# Supplementary material for: Integrated Single-Cell and RNA Sequencing Analysis Identifies Key Immune Cell and Dendritic Cells Associated Genes Participated in Myocarditis
Source: Hindawi journal article supplement (doi:10.1155/2022/8655343), 2022-10-03
Supplement: f1 [file 8655343.f1.zip]

| p_val | avg_log2F | pct.1 | pct.2 | p_val_adj | cluster   | gene     |
|-------|-----------|-------|-------|-----------|-----------|----------|
| 0     | 6.241712  | 0.991 | 0.273 | 0         | Fibroblas | Dcn      |
| 0     | 5.791857  | 0.992 | 0.537 | 0         | Fibroblas | Gsn      |
| 0     | 5.09981   | 0.967 | 0.148 | 0         | Fibroblas | Mgp      |
| 0     | 4.755996  | 0.978 | 0.082 | 0         | Fibroblas | Bgn      |
| 0     | 4.682293  | 0.984 | 0.135 | 0         | Fibroblas | Igfbp7   |
| 0     | 4.574651  | 0.972 | 0.07  | 0         | Fibroblas | Htra3    |
| 0     | 4.458437  | 0.962 | 0.068 | 0         | Fibroblas | Sparc    |
| 0     | 4.401816  | 0.954 | 0.048 | 0         | Fibroblas | Clec3b   |
| 0     | 4.273037  | 0.891 | 0.046 | 0         | Fibroblas | Lpl      |
| 0     | 4.233677  | 0.969 | 0.071 | 0         | Fibroblas | Sparcl1  |
| 0     | 4.187381  | 0.913 | 0.069 | 0         | Fibroblas | Col3a1   |
| 0     | 4.18565   | 0.96  | 0.057 | 0         | Fibroblas | Lum      |
| 0     | 4.177863  | 0.966 | 0.036 | 0         | Fibroblas | Serping1 |
| 0     | 4.000315  | 0.941 | 0.041 | 0         | Fibroblas | Colla2   |
| 0     | 3.859724  | 0.919 | 0.036 | 0         | Fibroblas | Serpinh1 |
| 0     | 3.857957  | 0.939 | 0.044 | 0         | Fibroblas | Gpx3     |
| 0     | 3.829328  | 0.915 | 0.039 | 0         | Fibroblas | Colla1   |
| 0     | 3.829208  | 0.908 | 0.035 | 0         | Fibroblas | Fbln1    |
| 0     | 3.732133  | 0.869 | 0.19  | 0         | Fibroblas | Mt1      |
| 0     | 3.713823  | 0.945 | 0.035 | 0         | Fibroblas | Pcolce   |
| 0     | 3.670387  | 0.953 | 0.051 | 0         | Fibroblas | Ltbp4    |
| 0     | 3.637268  | 0.965 | 0.327 | 0         | Fibroblas | Cebpd    |
| 0     | 3.625733  | 0.756 | 0.054 | 0         | Fibroblas | Hspb1    |
| 0     | 3.483854  | 0.95  | 0.029 | 0         | Fibroblas | Cygb     |
| 0     | 3.476809  | 0.913 | 0.159 | 0         | Fibroblas | Egr1     |
| 0     | 3.38306   | 0.935 | 0.327 | 0         | Fibroblas | Jun      |
| 0     | 3.352701  | 0.87  | 0.028 | 0         | Fibroblas | Smoc2    |
| 0     | 3.290302  | 0.902 | 0.028 | 0         | Fibroblas | Col6a1   |
| 0     | 3.257051  | 0.92  | 0.03  | 0         | Fibroblas | Cd34     |
| 0     | 3.23749   | 0.792 | 0.033 | 0         | Fibroblas | Mfap5    |
| 0     | 3.201867  | 0.879 | 0.027 | 0         | Fibroblas | Ccdc80   |
| 0     | 3.185358  | 0.896 | 0.027 | 0         | Fibroblas | Serpinf1 |
| 0     | 3.182546  | 0.914 | 0.028 | 0         | Fibroblas | Mmp2     |
| 0     | 3.182187  | 0.887 | 0.022 | 0         | Fibroblas | Col6a2   |
| 0     | 3.173664  | 0.619 | 0.041 | 0         | Fibroblas | Cxcl1    |
| 0     | 3.155207  | 0.862 | 0.026 | 0         | Fibroblas | Coll15a1 |
| 0     | 3.152484  | 0.896 | 0.04  | 0         | Fibroblas | Cfh      |
| 0     | 3.151253  | 0.883 | 0.025 | 0         | Fibroblas | Fbln2    |
| 0     | 3.151136  | 0.948 | 0.032 | 0         | Fibroblas | Rarres2  |
| 0     | 3.073758  | 0.958 | 0.116 | 0         | Fibroblas | Cd81     |
| 0     | 3.070649  | 0.317 | 0.016 | 0         | Fibroblas | Cxcl14   |
| 0     | 3.026673  | 0.732 | 0.018 | 0         | Fibroblas | Meg3     |
| 0     | 3.007128  | 0.738 | 0.019 | 0         | Fibroblas | Dpep1    |
| 0     | 2.993733  | 0.844 | 0.108 | 0         | Fibroblas | Klf4     |
| 0     | 2.957574  | 0.881 | 0.03  | 0         | Fibroblas | Fstl1    |
| 0     | 2.929779  | 0.901 | 0.023 | 0         | Fibroblas | Dpt      |
| 0     | 2.922159  | 0.929 | 0.068 | 0         | Fibroblas | Gstm1    |
| 0     | 2.885499  | 0.943 | 0.115 | 0         | Fibroblas | Igfbp4   |
| 0     | 2.869017  | 0.872 | 0.023 | 0         | Fibroblas | Nid1     |
| 0     | 2.820109  | 0.593 | 0.019 | 0         | Fibroblas | Cyr61    |
| 0     | 2.792105  | 0.822 | 0.018 | 0         | Fibroblas | Gas1     |
| 0     | 2.790571  | 0.926 | 0.025 | 0         | Fibroblas | Lhfp     |
| 0     | 2.779679  | 0.95  | 0.182 | 0         | Fibroblas | Ctsl     |

|            |       |       |                     |
|------------|-------|-------|---------------------|
| 0 2.769986 | 0.867 | 0.282 | 0 FibroblasPi16     |
| 0 2.734558 | 0.895 | 0.024 | 0 FibroblasPmp22    |
| 0 2.726921 | 0.934 | 0.114 | 0 FibroblasZbtb20   |
| 0 2.67426  | 0.873 | 0.023 | 0 FibroblasNfix     |
| 0 2.668038 | 0.86  | 0.022 | 0 FibroblasHspg2    |
| 0 2.661412 | 0.875 | 0.023 | 0 FibroblasRbp1     |
| 0 2.661101 | 0.839 | 0.021 | 0 FibroblasCol4a1   |
| 0 2.657951 | 0.786 | 0.098 | 0 FibroblasLy6a     |
| 0 2.656257 | 0.929 | 0.038 | 0 FibroblasSelenom  |
| 0 2.640362 | 0.876 | 0.034 | 0 FibroblasAxl      |
| 0 2.635108 | 0.832 | 0.088 | 0 FibroblasId3      |
| 0 2.622129 | 0.824 | 0.015 | 0 FibroblasPcsk6    |
| 0 2.606813 | 0.9   | 0.049 | 0 FibroblasLrp1     |
| 0 2.582505 | 0.778 | 0.033 | 0 FibroblasCkb      |
| 0 2.574819 | 0.857 | 0.017 | 0 FibroblasLoxl1    |
| 0 2.560858 | 0.97  | 0.21  | 0 FibroblasCd63     |
| 0 2.534107 | 0.848 | 0.017 | 0 FibroblasPrelp    |
| 0 2.518151 | 0.83  | 0.017 | 0 FibroblasPlpp3    |
| 0 2.515695 | 0.896 | 0.17  | 0 FibroblasCrispld2 |
| 0 2.496984 | 0.84  | 0.02  | 0 FibroblasTnxb     |
| 0 2.493252 | 0.871 | 0.04  | 0 FibroblasLamc1    |
| 0 2.488346 | 0.856 | 0.026 | 0 FibroblasSlc43a3  |
| 0 2.476219 | 0.943 | 0.249 | 0 FibroblasAnxa5    |
| 0 2.467021 | 0.77  | 0.015 | 0 FibroblasOgn      |
| 0 2.461419 | 0.802 | 0.018 | 0 FibroblasLamb1    |
| 0 2.453686 | 0.869 | 0.02  | 0 FibroblasSdc2     |
| 0 2.423712 | 0.857 | 0.02  | 0 FibroblasMxra8    |
| 0 2.416875 | 0.845 | 0.024 | 0 FibroblasAbca8a   |
| 0 2.416216 | 0.805 | 0.061 | 0 FibroblasEcml     |
| 0 2.401188 | 0.435 | 0.015 | 0 FibroblasMfap4    |
| 0 2.396018 | 0.903 | 0.154 | 0 FibroblasMtch1    |
| 0 2.383411 | 0.777 | 0.01  | 0 FibroblasIslr     |
| 0 2.381006 | 0.884 | 0.063 | 0 FibroblasKlf9     |
| 0 2.373134 | 0.851 | 0.05  | 0 FibroblasCrip2    |
| 0 2.365872 | 0.857 | 0.015 | 0 FibroblasNfib     |
| 0 2.364037 | 0.825 | 0.021 | 0 FibroblasGpm6b    |
| 0 2.359321 | 0.866 | 0.032 | 0 FibroblasRcn3     |
| 0 2.353622 | 0.787 | 0.236 | 0 FibroblasSocs3    |
| 0 2.311493 | 0.898 | 0.056 | 0 FibroblasNenf     |
| 0 2.302893 | 0.86  | 0.302 | 0 FibroblasHspal1b  |
| 0 2.297163 | 0.798 | 0.01  | 0 FibroblasTcf21    |
| 0 2.294079 | 0.664 | 0.151 | 0 FibroblasApoe     |
| 0 2.293227 | 0.894 | 0.066 | 0 FibroblasRnase4   |
| 0 2.291328 | 0.929 | 0.331 | 0 FibroblasTubala   |
| 0 2.287531 | 0.711 | 0.012 | 0 FibroblasCol8a1   |
| 0 2.275409 | 0.808 | 0.016 | 0 FibroblasOlfml3   |
| 0 2.272729 | 0.868 | 0.064 | 0 FibroblasTcf4     |
| 0 2.272397 | 0.842 | 0.016 | 0 FibroblasRhoj     |
| 0 2.265369 | 0.898 | 0.138 | 0 FibroblasSptbn1   |
| 0 2.258854 | 0.872 | 0.046 | 0 FibroblasCd302    |
| 0 2.249675 | 0.783 | 0.027 | 0 FibroblasSpry1    |
| 0 2.236685 | 0.849 | 0.083 | 0 FibroblasSerpnb6a |
| 0 2.223061 | 0.821 | 0.017 | 0 FibroblasCpq      |
| 0 2.221877 | 0.909 | 0.636 | 0 FibroblasFos      |

|            |       |       |                     |
|------------|-------|-------|---------------------|
| 0 2.206061 | 0.932 | 0.18  | 0 FibroblasCyb5a    |
| 0 2.204785 | 0.643 | 0.01  | 0 FibroblasSpon2    |
| 0 2.188465 | 0.508 | 0.017 | 0 FibroblasCtgf     |
| 0 2.187738 | 0.733 | 0.011 | 0 FibroblasAdamts5  |
| 0 2.155388 | 0.691 | 0.018 | 0 FibroblasTimp3    |
| 0 2.148102 | 0.764 | 0.015 | 0 FibroblasOaf      |
| 0 2.141603 | 0.542 | 0.038 | 0 FibroblasMt2      |
| 0 2.135343 | 0.647 | 0.017 | 0 FibroblasAspn     |
| 0 2.131067 | 0.788 | 0.013 | 0 FibroblasPtgis    |
| 0 2.126569 | 0.852 | 0.051 | 0 FibroblasNedd4    |
| 0 2.113845 | 0.692 | 0.011 | 0 FibroblasPcolce2  |
| 0 2.104526 | 0.752 | 0.02  | 0 FibroblasPam      |
| 0 2.10435  | 0.934 | 0.2   | 0 FibroblasSelenop  |
| 0 2.091383 | 0.708 | 0.012 | 0 FibroblasCol6a3   |
| 0 2.084352 | 0.785 | 0.016 | 0 FibroblasPlxdc2   |
| 0 2.08411  | 0.711 | 0.035 | 0 FibroblasAtf5     |
| 0 2.082043 | 0.801 | 0.009 | 0 FibroblasBicc1    |
| 0 2.073528 | 0.939 | 0.271 | 0 FibroblasLaptm4a  |
| 0 2.07214  | 0.763 | 0.012 | 0 FibroblasRamp2    |
| 0 2.068852 | 0.788 | 0.015 | 0 FibroblasCavin3   |
| 0 2.029463 | 0.777 | 0.012 | 0 FibroblasLama2    |
| 0 2.015071 | 0.616 | 0.012 | 0 FibroblasNbl1     |
| 0 1.993474 | 0.811 | 0.016 | 0 FibroblasFxyd1    |
| 0 1.992633 | 0.768 | 0.092 | 0 FibroblasErrfil   |
| 0 1.988165 | 0.812 | 0.177 | 0 FibroblasPmepal   |
| 0 1.968313 | 0.762 | 0.038 | 0 FibroblasNupr1    |
| 0 1.96818  | 0.985 | 0.696 | 0 FibroblasCst3     |
| 0 1.967625 | 0.754 | 0.012 | 0 FibroblasCol5a1   |
| 0 1.962545 | 0.791 | 0.299 | 0 FibroblasHspala   |
| 0 1.961406 | 0.777 | 0.02  | 0 FibroblasDdah2    |
| 0 1.950349 | 0.743 | 0.01  | 0 FibroblasAdamts2  |
| 0 1.94081  | 0.633 | 0.012 | 0 FibroblasGfpt2    |
| 0 1.937923 | 0.705 | 0.011 | 0 FibroblasFbn1     |
| 0 1.935616 | 0.734 | 0.01  | 0 FibroblasFbln5    |
| 0 1.920891 | 0.751 | 0.009 | 0 FibroblasEntpd2   |
| 0 1.902007 | 0.574 | 0.151 | 0 FibroblasC3       |
| 0 1.888182 | 0.805 | 0.076 | 0 FibroblasCamk2n1  |
| 0 1.867108 | 0.966 | 0.546 | 0 FibroblasVim      |
| 0 1.866808 | 0.732 | 0.013 | 0 FibroblasCol5a2   |
| 0 1.866036 | 0.749 | 0.015 | 0 FibroblasFhl1     |
| 0 1.857884 | 0.755 | 0.01  | 0 FibroblasPdgfra   |
| 0 1.854655 | 0.623 | 0.012 | 0 FibroblasEln      |
| 0 1.842787 | 0.51  | 0.01  | 0 FibroblasAckr3    |
| 0 1.842069 | 0.779 | 0.052 | 0 FibroblasNfic     |
| 0 1.835874 | 0.707 | 0.016 | 0 FibroblasAce      |
| 0 1.832779 | 0.806 | 0.082 | 0 FibroblasRhoc     |
| 0 1.827911 | 0.789 | 0.249 | 0 FibroblasFosb     |
| 0 1.819579 | 0.604 | 0.008 | 0 FibroblasGsta3    |
| 0 1.808015 | 0.701 | 0.008 | 0 FibroblasMedag    |
| 0 1.806922 | 0.907 | 0.318 | 0 FibroblasRho      |
| 0 1.804007 | 0.681 | 0.023 | 0 FibroblasSelenbp1 |
| 0 1.797572 | 0.745 | 0.023 | 0 FibroblasNfia     |
| 0 1.797403 | 0.653 | 0.071 | 0 FibroblasUap1     |
| 0 1.79475  | 0.979 | 0.425 | 0 FibroblasIfitm3   |

|   |          |       |       |                     |
|---|----------|-------|-------|---------------------|
| 0 | 1.790589 | 0.667 | 0.017 | 0 FibroblasSerpine2 |
| 0 | 1.788294 | 0.763 | 0.013 | 0 FibroblasSlc100a6 |
| 0 | 1.78161  | 0.709 | 0.015 | 0 FibroblasSod3     |
| 0 | 1.777742 | 0.708 | 0.02  | 0 FibroblasEmilin1  |
| 0 | 1.773558 | 0.644 | 0.01  | 0 FibroblasHtral    |
| 0 | 1.768221 | 0.747 | 0.018 | 0 FibroblasPkd2     |
| 0 | 1.752505 | 0.747 | 0.026 | 0 FibroblasItgb5    |
| 0 | 1.750936 | 0.85  | 0.126 | 0 FibroblasTmed3    |
| 0 | 1.748781 | 0.673 | 0.014 | 0 FibroblasPpp1r14a |
| 0 | 1.742074 | 0.751 | 0.049 | 0 FibroblasSlc29a1  |
| 0 | 1.739542 | 0.81  | 0.055 | 0 FibroblasFcgrt    |
| 0 | 1.729884 | 0.75  | 0.014 | 0 FibroblasFkbp9    |
| 0 | 1.724576 | 0.716 | 0.01  | 0 FibroblasMxra7    |
| 0 | 1.70444  | 0.858 | 0.173 | 0 FibroblasYbx3     |
| 0 | 1.702481 | 0.711 | 0.138 | 0 FibroblasPnp      |
| 0 | 1.702189 | 0.693 | 0.01  | 0 FibroblasLama4    |
| 0 | 1.699645 | 0.902 | 0.223 | 0 FibroblasSlc25a4  |
| 0 | 1.699528 | 0.559 | 0.084 | 0 FibroblasUgdh     |
| 0 | 1.682795 | 0.674 | 0.006 | 0 FibroblasAebp1    |
| 0 | 1.675365 | 0.694 | 0.02  | 0 FibroblasNav1     |
| 0 | 1.671557 | 0.601 | 0.009 | 0 FibroblasCol5a3   |
| 0 | 1.655779 | 0.738 | 0.016 | 0 FibroblasCald1    |
| 0 | 1.655614 | 0.721 | 0.01  | 0 FibroblasFermt2   |
| 0 | 1.650679 | 0.66  | 0.02  | 0 FibroblasAngptl2  |
| 0 | 1.642508 | 0.597 | 0.006 | 0 FibroblasSfrp1    |
| 0 | 1.628557 | 0.765 | 0.047 | 0 FibroblasVkorc1   |
| 0 | 1.627836 | 0.62  | 0.019 | 0 FibroblasPlala    |
| 0 | 1.620069 | 0.923 | 0.295 | 0 FibroblasBsg      |
| 0 | 1.617172 | 0.581 | 0.036 | 0 FibroblasBag3     |
| 0 | 1.612252 | 0.778 | 0.077 | 0 FibroblasTxndc5   |
| 0 | 1.609236 | 0.764 | 0.064 | 0 FibroblasCalu     |
| 0 | 1.608903 | 0.911 | 0.427 | 0 FibroblasCalr     |
| 0 | 1.602703 | 0.899 | 0.343 | 0 FibroblasHsp90b1  |
| 0 | 1.595889 | 0.565 | 0.008 | 0 FibroblasFibin    |
| 0 | 1.595851 | 0.915 | 0.339 | 0 FibroblasAldh2    |
| 0 | 1.595444 | 0.748 | 0.054 | 0 FibroblasRras     |
| 0 | 1.589339 | 0.731 | 0.169 | 0 FibroblasPhlda1   |
| 0 | 1.58096  | 0.674 | 0.014 | 0 FibroblasIl1lral  |
| 0 | 1.578209 | 0.928 | 0.344 | 0 FibroblasTimp2    |
| 0 | 1.577842 | 0.776 | 0.109 | 0 FibroblasEmp1     |
| 0 | 1.567125 | 0.702 | 0.084 | 0 FibroblasItm2a    |
| 0 | 1.565724 | 0.653 | 0.006 | 0 FibroblasVwal     |
| 0 | 1.565349 | 0.657 | 0.009 | 0 FibroblasDpysl3   |
| 0 | 1.564932 | 0.449 | 0.015 | 0 FibroblasTnfaip6  |
| 0 | 1.558169 | 0.521 | 0.007 | 0 FibroblasFmo2     |
| 0 | 1.557529 | 0.627 | 0.011 | 0 FibroblasCol4a2   |
| 0 | 1.554954 | 0.704 | 0.016 | 0 FibroblasFgfr1    |
| 0 | 1.55275  | 0.65  | 0.017 | 0 FibroblasTm4sf1   |
| 0 | 1.546501 | 0.886 | 0.331 | 0 FibroblasPdla3    |
| 0 | 1.544517 | 0.861 | 0.2   | 0 FibroblasApp      |
| 0 | 1.542733 | 0.913 | 0.33  | 0 FibroblasPtms     |
| 0 | 1.54208  | 0.684 | 0.046 | 0 FibroblasSocs2    |
| 0 | 1.536654 | 0.667 | 0.009 | 0 FibroblasMmp23    |
| 0 | 1.533409 | 0.587 | 0.01  | 0 FibroblasFxyd6    |

|   |          |       |       |   |                  |
|---|----------|-------|-------|---|------------------|
| 0 | 1.527816 | 0.705 | 0.013 | 0 | FibroblasFkbp7   |
| 0 | 1.524393 | 0.924 | 0.327 | 0 | FibroblasSelenof |
| 0 | 1.521298 | 0.554 | 0.013 | 0 | FibroblasAdamts1 |
| 0 | 1.50969  | 0.684 | 0.01  | 0 | FibroblasP3h3    |
| 0 | 1.501883 | 0.68  | 0.016 | 0 | FibroblasCavin1  |
| 0 | 1.500308 | 0.581 | 0.008 | 0 | FibroblasScara5  |
| 0 | 1.494355 | 0.55  | 0.011 | 0 | FibroblasGas6    |
| 0 | 1.485883 | 0.468 | 0.01  | 0 | FibroblasPgf     |
| 0 | 1.47772  | 0.84  | 0.187 | 0 | FibroblasDdost   |
| 0 | 1.470783 | 0.625 | 0.014 | 0 | FibroblasNdrp2   |
| 0 | 1.46604  | 0.808 | 0.139 | 0 | FibroblasAr11    |
| 0 | 1.447906 | 0.571 | 0.008 | 0 | FibroblasFrzb    |
| 0 | 1.445454 | 0.556 | 0.009 | 0 | FibroblasColl4a1 |
| 0 | 1.444861 | 0.574 | 0.008 | 0 | FibroblasLoxl2   |
| 0 | 1.443228 | 0.647 | 0.008 | 0 | FibroblasLpar1   |
| 0 | 1.440829 | 0.639 | 0.01  | 0 | FibroblasNdn     |
| 0 | 1.434848 | 0.642 | 0.009 | 0 | FibroblasSnhg18  |
| 0 | 1.431173 | 0.94  | 0.43  | 0 | FibroblasPpib    |
| 0 | 1.429669 | 0.545 | 0.134 | 0 | FibroblasGadd45g |
| 0 | 1.421921 | 0.816 | 0.208 | 0 | FibroblasPdia6   |
| 0 | 1.417932 | 0.623 | 0.106 | 0 | FibroblasGem     |
| 0 | 1.417806 | 0.505 | 0.009 | 0 | FibroblasVcam1   |
| 0 | 1.410271 | 0.58  | 0.011 | 0 | FibroblasMaged2  |
| 0 | 1.406565 | 0.588 | 0.008 | 0 | FibroblasAldh1a1 |
| 0 | 1.402019 | 0.685 | 0.04  | 0 | FibroblasMfge8   |
| 0 | 1.397301 | 0.654 | 0.018 | 0 | FibroblasEng     |
| 0 | 1.395619 | 0.505 | 0.042 | 0 | FibroblasTppp3   |
| 0 | 1.395088 | 0.723 | 0.055 | 0 | FibroblasTspan3  |
| 0 | 1.394742 | 0.643 | 0.012 | 0 | FibroblasNpdc1   |
| 0 | 1.394569 | 0.665 | 0.01  | 0 | FibroblasGpx8    |
| 0 | 1.390653 | 0.914 | 0.341 | 0 | FibroblasLamp1   |
| 0 | 1.389308 | 0.558 | 0.008 | 0 | FibroblasCp      |
| 0 | 1.387811 | 0.625 | 0.012 | 0 | FibroblasSteap3  |
| 0 | 1.385059 | 0.623 | 0.009 | 0 | FibroblasPlpp1   |
| 0 | 1.384601 | 0.673 | 0.034 | 0 | FibroblasThra    |
| 0 | 1.383178 | 0.684 | 0.042 | 0 | FibroblasRcn1    |
| 0 | 1.379902 | 0.73  | 0.094 | 0 | FibroblasDap     |
| 0 | 1.377184 | 0.65  | 0.021 | 0 | FibroblasTpst1   |
| 0 | 1.373765 | 0.608 | 0.01  | 0 | FibroblasPpic    |
| 0 | 1.370798 | 0.398 | 0.008 | 0 | FibroblasMeox1   |
| 0 | 1.367856 | 0.567 | 0.01  | 0 | FibroblasTbx20   |
| 0 | 1.36566  | 0.588 | 0.006 | 0 | FibroblasMatn2   |
| 0 | 1.357587 | 0.618 | 0.013 | 0 | FibroblasColec12 |
| 0 | 1.355696 | 0.601 | 0.007 | 0 | FibroblasKdelr3  |
| 0 | 1.355236 | 0.592 | 0.007 | 0 | FibroblasClra    |
| 0 | 1.350062 | 0.972 | 0.618 | 0 | FibroblasGnas    |
| 0 | 1.349395 | 0.642 | 0.009 | 0 | FibroblasSgce    |
| 0 | 1.346461 | 0.58  | 0.007 | 0 | FibroblasAbi3bp  |
| 0 | 1.345447 | 0.619 | 0.009 | 0 | FibroblasBmp1    |
| 0 | 1.344792 | 0.804 | 0.157 | 0 | FibroblasLmna    |
| 0 | 1.340968 | 0.664 | 0.035 | 0 | FibroblasCnn3    |
| 0 | 1.335175 | 0.566 | 0.149 | 0 | FibroblasHsd11b1 |
| 0 | 1.332485 | 0.498 | 0.005 | 0 | FibroblasThbs2   |
| 0 | 1.331349 | 0.816 | 0.181 | 0 | FibroblasItm2c   |

|   |          |       |       |                     |
|---|----------|-------|-------|---------------------|
| 0 | 1.327512 | 0.515 | 0.005 | 0 FibroblasMs4a4d   |
| 0 | 1.3246   | 0.418 | 0.04  | 0 FibroblasIgfbp6   |
| 0 | 1.318823 | 0.607 | 0.005 | 0 FibroblasMrc2     |
| 0 | 1.318022 | 0.627 | 0.013 | 0 FibroblasMaged1   |
| 0 | 1.316795 | 0.606 | 0.006 | 0 FibroblasGpr153   |
| 0 | 1.30713  | 0.706 | 0.069 | 0 FibroblasComt     |
| 0 | 1.300822 | 0.631 | 0.039 | 0 FibroblasVat1     |
| 0 | 1.294805 | 0.671 | 0.051 | 0 FibroblasLman1    |
| 0 | 1.290627 | 0.571 | 0.013 | 0 FibroblasAkap12   |
| 0 | 1.286099 | 0.512 | 0.006 | 0 FibroblasCpxm1    |
| 0 | 1.283153 | 0.737 | 0.132 | 0 FibroblasKdelr2   |
| 0 | 1.279517 | 0.585 | 0.014 | 0 FibroblasMmp14    |
| 0 | 1.2764   | 0.39  | 0.009 | 0 FibroblasSerpine1 |
| 0 | 1.275882 | 0.57  | 0.012 | 0 FibroblasLamb2    |
| 0 | 1.270822 | 0.616 | 0.044 | 0 FibroblasCyth3    |
| 0 | 1.270229 | 0.568 | 0.022 | 0 FibroblasAr       |
| 0 | 1.263907 | 0.556 | 0.009 | 0 FibroblasEcm2     |
| 0 | 1.263869 | 0.68  | 0.085 | 0 FibroblasDpys12   |
| 0 | 1.251698 | 0.49  | 0.006 | 0 FibroblasBmp4     |
| 0 | 1.251387 | 0.504 | 0.004 | 0 FibroblasPodn     |
| 0 | 1.244585 | 0.555 | 0.023 | 0 FibroblasAtpla2   |
| 0 | 1.243395 | 0.611 | 0.047 | 0 FibroblasHeg1     |
| 0 | 1.238472 | 0.624 | 0.014 | 0 FibroblasGng11    |
| 0 | 1.236154 | 0.556 | 0.006 | 0 FibroblasScn7a    |
| 0 | 1.232757 | 0.503 | 0.007 | 0 FibroblasC1s1     |
| 0 | 1.232402 | 0.478 | 0.007 | 0 FibroblasIgfl     |
| 0 | 1.231434 | 0.337 | 0.046 | 0 FibroblasMbd1     |
| 0 | 1.228588 | 0.616 | 0.05  | 0 FibroblasClic4    |
| 0 | 1.222543 | 0.579 | 0.014 | 0 Fibroblas 8-Sep   |
| 0 | 1.219417 | 0.543 | 0.006 | 0 FibroblasC1qtnf7  |
| 0 | 1.218426 | 0.668 | 0.056 | 0 FibroblasPtov1    |
| 0 | 1.2165   | 0.65  | 0.054 | 0 FibroblasPrdx4    |
| 0 | 1.210715 | 0.524 | 0.181 | 0 FibroblasGm12840  |
| 0 | 1.210013 | 0.802 | 0.2   | 0 FibroblasRpn2     |
| 0 | 1.207656 | 0.44  | 0.045 | 0 FibroblasHk2      |
| 0 | 1.207055 | 0.798 | 0.172 | 0 FibroblasHmgn1    |
| 0 | 1.206015 | 0.598 | 0.015 | 0 FibroblasRyk      |
| 0 | 1.197432 | 0.539 | 0.013 | 0 FibroblasPhlda3   |
| 0 | 1.191716 | 0.786 | 0.229 | 0 FibroblasDbi      |
| 0 | 1.185744 | 0.914 | 0.366 | 0 FibroblasPrdx1    |
| 0 | 1.182384 | 0.446 | 0.004 | 0 FibroblasRgs17    |
| 0 | 1.180121 | 0.581 | 0.014 | 0 FibroblasEhd2     |
| 0 | 1.179228 | 0.555 | 0.009 | 0 FibroblasSash1    |
| 0 | 1.178483 | 0.53  | 0.028 | 0 FibroblasVcan     |
| 0 | 1.177223 | 0.706 | 0.099 | 0 FibroblasAtraid   |
| 0 | 1.172894 | 0.762 | 0.26  | 0 FibroblasCdkn1a   |
| 0 | 1.168426 | 0.562 | 0.005 | 0 FibroblasNaalad2  |
| 0 | 1.161531 | 0.57  | 0.012 | 0 FibroblasLtbp3    |
| 0 | 1.161399 | 0.782 | 0.176 | 0 FibroblasOat      |
| 0 | 1.158707 | 0.796 | 0.199 | 0 FibroblasKdelr1   |
| 0 | 1.154112 | 0.576 | 0.019 | 0 FibroblasCrtp     |
| 0 | 1.152266 | 0.567 | 0.009 | 0 FibroblasGpx7     |
| 0 | 1.152055 | 0.514 | 0.035 | 0 FibroblasSulf2    |
| 0 | 1.149671 | 0.619 | 0.051 | 0 FibroblasCnpy2    |

|   |          |       |       |   |                   |
|---|----------|-------|-------|---|-------------------|
| 0 | 1.145847 | 0.862 | 0.284 | 0 | FibroblasFkbp1a   |
| 0 | 1.142201 | 0.56  | 0.016 | 0 | FibroblasTceal8   |
| 0 | 1.141605 | 0.528 | 0.007 | 0 | FibroblasKhdrbs3  |
| 0 | 1.134742 | 0.561 | 0.023 | 0 | FibroblasMast4    |
| 0 | 1.129232 | 0.496 | 0.005 | 0 | FibroblasGstm2    |
| 0 | 1.129168 | 0.82  | 0.225 | 0 | FibroblasSwi5     |
| 0 | 1.1266   | 0.679 | 0.092 | 0 | FibroblasPeal5a   |
| 0 | 1.125165 | 0.866 | 0.285 | 0 | FibroblasKrtcap2  |
| 0 | 1.120126 | 0.56  | 0.012 | 0 | FibroblasCopz2    |
| 0 | 1.116018 | 0.435 | 0.009 | 0 | FibroblasNdufa412 |
| 0 | 1.114781 | 0.423 | 0.106 | 0 | FibroblasLy6c1    |
| 0 | 1.1143   | 0.682 | 0.095 | 0 | FibroblasLrpap1   |
| 0 | 1.113896 | 0.686 | 0.136 | 0 | FibroblasPdlim2   |
| 0 | 1.110876 | 0.94  | 0.491 | 0 | FibroblasDynl11   |
| 0 | 1.108039 | 0.453 | 0.009 | 0 | FibroblasCryab    |
| 0 | 1.106903 | 0.479 | 0.006 | 0 | FibroblasPdgr1    |
| 0 | 1.106575 | 0.647 | 0.086 | 0 | FibroblasTceal9   |
| 0 | 1.102457 | 0.765 | 0.164 | 0 | FibroblasMap11c3a |
| 0 | 1.100558 | 0.652 | 0.081 | 0 | FibroblasIl6st    |
| 0 | 1.100442 | 0.424 | 0.005 | 0 | FibroblasEfemp1   |
| 0 | 1.100313 | 0.815 | 0.206 | 0 | FibroblasDstn     |
| 0 | 1.099326 | 0.572 | 0.034 | 0 | FibroblasEcel     |
| 0 | 1.098376 | 0.733 | 0.145 | 0 | FibroblasErgic3   |
| 0 | 1.093919 | 0.519 | 0.012 | 0 | FibroblasLimal    |
| 0 | 1.092263 | 0.549 | 0.011 | 0 | FibroblasEfemp2   |
| 0 | 1.091881 | 0.554 | 0.054 | 0 | FibroblasF2r      |
| 0 | 1.090672 | 0.535 | 0.005 | 0 | FibroblasTmem45a  |
| 0 | 1.090162 | 0.557 | 0.085 | 0 | FibroblasKcnqlot1 |
| 0 | 1.088483 | 0.509 | 0.007 | 0 | FibroblasFam198b  |
| 0 | 1.087311 | 0.758 | 0.174 | 0 | FibroblasPrdx2    |
| 0 | 1.086669 | 0.549 | 0.046 | 0 | FibroblasLrrc8a   |
| 0 | 1.083143 | 0.555 | 0.049 | 0 | FibroblasTubb6    |
| 0 | 1.081926 | 0.452 | 0.008 | 0 | FibroblasPlat     |
| 0 | 1.08138  | 0.991 | 0.911 | 0 | FibroblasItm2b    |
| 0 | 1.080727 | 0.478 | 0.005 | 0 | FibroblasSrp2     |
| 0 | 1.080634 | 0.881 | 0.534 | 0 | FibroblasHsp90aa1 |
| 0 | 1.079686 | 0.806 | 0.268 | 0 | FibroblasRrbp1    |
| 0 | 1.074027 | 0.607 | 0.045 | 0 | FibroblasGnal1    |
| 0 | 1.072953 | 0.655 | 0.177 | 0 | FibroblasGlul     |
| 0 | 1.069932 | 0.855 | 0.272 | 0 | FibroblasTubal1   |
| 0 | 1.069669 | 0.517 | 0.015 | 0 | FibroblasAcvr11   |
| 0 | 1.068908 | 0.979 | 0.895 | 0 | FibroblasJund     |
| 0 | 1.065489 | 0.574 | 0.031 | 0 | FibroblasTnfrsf12 |
| 0 | 1.063523 | 0.839 | 0.283 | 0 | FibroblasAhnak    |
| 0 | 1.06318  | 0.681 | 0.246 | 0 | FibroblasAtf3     |
| 0 | 1.061739 | 0.43  | 0.007 | 0 | FibroblasHey1     |
| 0 | 1.059643 | 0.5   | 0.006 | 0 | FibroblasGstt1    |
| 0 | 1.058982 | 0.812 | 0.237 | 0 | FibroblasPebp1    |
| 0 | 1.057326 | 0.544 | 0.017 | 0 | FibroblasClstn1   |
| 0 | 1.0541   | 0.992 | 0.686 | 0 | Fibroblasmt-Cytb  |
| 0 | 1.05291  | 0.526 | 0.017 | 0 | FibroblasLysmd2   |
| 0 | 1.052315 | 0.597 | 0.062 | 0 | FibroblasLrrc58   |
| 0 | 1.047788 | 0.636 | 0.155 | 0 | FibroblasPpp1r14b |
| 0 | 1.044529 | 0.475 | 0.005 | 0 | FibroblasClmp     |

|   |          |       |       |                     |
|---|----------|-------|-------|---------------------|
| 0 | 1.04338  | 0.545 | 0.032 | 0 FibroblasCd151    |
| 0 | 1.040424 | 0.51  | 0.008 | 0 FibroblasCreb311  |
| 0 | 1.038844 | 0.511 | 0.007 | 0 FibroblasArhgef40 |
| 0 | 1.035635 | 0.538 | 0.051 | 0 FibroblasRaph1    |
| 0 | 1.033291 | 0.418 | 0.007 | 0 FibroblasPrss23   |
| 0 | 1.032382 | 0.494 | 0.006 | 0 FibroblasGhr      |
| 0 | 1.032085 | 0.517 | 0.014 | 0 FibroblasDst      |
| 0 | 1.025316 | 0.764 | 0.253 | 0 FibroblasManf     |
| 0 | 1.023468 | 0.579 | 0.046 | 0 FibroblasFncl3b   |
| 0 | 1.022313 | 0.395 | 0.004 | 0 FibroblasSox9     |
| 0 | 1.017164 | 0.515 | 0.007 | 0 FibroblasParva    |
| 0 | 1.015259 | 0.454 | 0.02  | 0 FibroblasItih5    |
| 0 | 1.012197 | 0.624 | 0.114 | 0 FibroblasSlcla5   |
| 0 | 1.012142 | 0.718 | 0.155 | 0 FibroblasSsr2     |
| 0 | 1.011812 | 0.769 | 0.19  | 0 FibroblasP4hb     |
| 0 | 1.010982 | 0.484 | 0.014 | 0 FibroblasCreb312  |
| 0 | 1.00959  | 0.876 | 0.385 | 0 FibroblasArf4     |
| 0 | 1.009584 | 0.474 | 0.016 | 0 FibroblasCyp27a1  |
| 0 | 1.006788 | 0.497 | 0.029 | 0 FibroblasNrpl     |
| 0 | 1.00382  | 0.42  | 0.006 | 0 FibroblasSpon1    |
| 0 | 1.002337 | 0.553 | 0.047 | 0 FibroblasRbpms    |
| 0 | -1.01658 | 0.591 | 0.622 | 0 FibroblasMsn      |
| 0 | -1.01783 | 0.909 | 0.904 | 0 FibroblasCfl1     |
| 0 | -1.02813 | 0.974 | 0.969 | 0 FibroblasH3f3b    |
| 0 | -1.03097 | 0.066 | 0.278 | 0 FibroblasGng2     |
| 0 | -1.05025 | 0.018 | 0.273 | 0 FibroblasIkzf1    |
| 0 | -1.05566 | 0.04  | 0.265 | 0 FibroblasB4galnt1 |
| 0 | -1.05778 | 0.756 | 0.764 | 0 FibroblasRap1b    |
| 0 | -1.09321 | 0.021 | 0.279 | 0 FibroblasArhgap9  |
| 0 | -1.10657 | 0.022 | 0.284 | 0 FibroblasTbcd10c  |
| 0 | -1.11386 | 0.02  | 0.278 | 0 FibroblasPstpip1  |
| 0 | -1.1391  | 0.814 | 0.767 | 0 FibroblasPkm      |
| 0 | -1.13923 | 0.813 | 0.812 | 0 FibroblasPnrc1    |
| 0 | -1.1482  | 0.99  | 0.993 | 0 FibroblasFau      |
| 0 | -1.15539 | 0.088 | 0.324 | 0 FibroblasRasgrp2  |
| 0 | -1.16585 | 0.48  | 0.581 | 0 FibroblasSupt4a   |
| 0 | -1.16728 | 0.067 | 0.277 | 0 FibroblasSkap2    |
| 0 | -1.16766 | 0.151 | 0.345 | 0 FibroblasAtp11b   |
| 0 | -1.18777 | 0.104 | 0.331 | 0 FibroblasArl4c    |
| 0 | -1.19532 | 0.076 | 0.272 | 0 FibroblasSyk      |
| 0 | -1.20152 | 0.873 | 0.796 | 0 FibroblasMap11c3b |
| 0 | -1.22314 | 0.27  | 0.451 | 0 FibroblasApbb1ip  |
| 0 | -1.2283  | 0.038 | 0.281 | 0 FibroblasRetreg1  |
| 0 | -1.23457 | 0.807 | 0.805 | 0 FibroblasArpc3    |
| 0 | -1.24589 | 0.074 | 0.322 | 0 FibroblasChd7     |
| 0 | -1.24865 | 0.017 | 0.29  | 0 FibroblasItgb7    |
| 0 | -1.25147 | 0.072 | 0.296 | 0 FibroblasRassf3   |
| 0 | -1.25247 | 0.548 | 0.638 | 0 FibroblasClk1     |
| 0 | -1.2576  | 0.594 | 0.651 | 0 FibroblasH2afj    |
| 0 | -1.26164 | 0.029 | 0.331 | 0 FibroblasArhgap15 |
| 0 | -1.2689  | 0.022 | 0.274 | 0 FibroblasPtpn22   |
| 0 | -1.27268 | 0.086 | 0.307 | 0 Fibroblas 1-Sep   |
| 0 | -1.27595 | 0.083 | 0.285 | 0 FibroblasCsf2ra   |
| 0 | -1.27888 | 0.024 | 0.344 | 0 FibroblasArhgap30 |



|   |          |       |       |                          |
|---|----------|-------|-------|--------------------------|
| 0 | -1.28199 | 0.586 | 0.598 | 0 FibroblasSub1          |
| 0 | -1.28575 | 0.33  | 0.506 | 0 FibroblasPpplr18       |
| 0 | -1.29291 | 0.022 | 0.252 | 0 FibroblasThemis2       |
| 0 | -1.30132 | 0.021 | 0.258 | 0 FibroblasNfam1         |
| 0 | -1.30182 | 0.473 | 0.594 | 0 FibroblasDazap2        |
| 0 | -1.31365 | 0.021 | 0.27  | 0 FibroblasItgam         |
| 0 | -1.31551 | 0.02  | 0.344 | 0 FibroblasBin2          |
| 0 | -1.32784 | 0.017 | 0.275 | 0 FibroblasGimap1        |
| 0 | -1.33806 | 0.158 | 0.395 | 0 FibroblasFmnl1         |
| 0 | -1.35028 | 0.155 | 0.414 | 0 FibroblasAnkrd44       |
| 0 | -1.35194 | 0.572 | 0.674 | 0 FibroblasActr3         |
| 0 | -1.35723 | 0.351 | 0.49  | 0 FibroblasEzr           |
| 0 | -1.35999 | 0.024 | 0.33  | 0 FibroblasCd84          |
| 0 | -1.37005 | 0.134 | 0.403 | 0 FibroblasCd82          |
| 0 | -1.38254 | 0.026 | 0.369 | 0 FibroblasDock2         |
| 0 | -1.38778 | 0.409 | 0.607 | 0 FibroblasCnn2          |
| 0 | -1.38836 | 0.027 | 0.34  | 0 FibroblasInpp5d        |
| 0 | -1.38882 | 0.024 | 0.327 | 0 FibroblasPtpn6         |
| 0 | -1.39065 | 0.611 | 0.668 | 0 FibroblasCap1          |
| 0 | -1.40436 | 0.067 | 0.33  | 0 FibroblasLyn           |
| 0 | -1.40897 | 0.068 | 0.383 | 0 FibroblasSlc9a3r1      |
| 0 | -1.40965 | 0.024 | 0.276 | 0 FibroblasCd300lf       |
| 0 | -1.41215 | 0.2   | 0.459 | 0 FibroblasGrk2          |
| 0 | -1.41484 | 0.536 | 0.619 | 0 FibroblasIqgap1        |
| 0 | -1.41698 | 0.027 | 0.341 | 0 FibroblasMyolf         |
| 0 | -1.41943 | 0.779 | 0.845 | 0 FibroblasArpc2         |
| 0 | -1.44986 | 0.023 | 0.288 | 0 FibroblasPtprecap      |
| 0 | -1.45087 | 0.021 | 0.279 | 0 FibroblasLck           |
| 0 | -1.46184 | 0.022 | 0.279 | 0 FibroblasTrem3         |
| 0 | -1.46199 | 0.023 | 0.261 | 0 FibroblasAC110211.1    |
| 0 | -1.4794  | 0.021 | 0.283 | 0 FibroblasCd300a        |
| 0 | -1.48239 | 0.023 | 0.278 | 0 FibroblasPilra         |
| 0 | -1.48523 | 0.525 | 0.649 | 0 FibroblasOstf1         |
| 0 | -1.48729 | 0.053 | 0.278 | 0 FibroblasEntpd1        |
| 0 | -1.49091 | 0.114 | 0.404 | 0 FibroblasVsir          |
| 0 | -1.49577 | 0.029 | 0.261 | 0 FibroblasAnkrd33b      |
| 0 | -1.49924 | 0.969 | 0.983 | 0 FibroblasActg1         |
| 0 | -1.50426 | 0.976 | 0.989 | 0 FibroblasH2-D1         |
| 0 | -1.50876 | 0.641 | 0.734 | 0 FibroblasArpc5         |
| 0 | -1.51875 | 0.212 | 0.484 | 0 FibroblasLrrfipl       |
| 0 | -1.52048 | 0.669 | 0.773 | 0 FibroblasSh3bgrl3      |
| 0 | -1.52416 | 0.99  | 0.995 | 0 FibroblasActb          |
| 0 | -1.53501 | 0.119 | 0.358 | 0 FibroblasTnfaip3       |
| 0 | -1.53681 | 0.074 | 0.359 | 0 FibroblasDusp5         |
| 0 | -1.5387  | 0.329 | 0.515 | 0 FibroblasRhog          |
| 0 | -1.542   | 0.946 | 0.958 | 0 FibroblasH3f3a         |
| 0 | -1.54632 | 0.041 | 0.324 | 0 Fibroblas2310001H17Rik |
| 0 | -1.55277 | 0.016 | 0.269 | 0 FibroblasBcl2alb       |
| 0 | -1.56588 | 0.025 | 0.268 | 0 FibroblasCd93          |
| 0 | -1.56854 | 0.412 | 0.556 | 0 FibroblasAdgre5        |
| 0 | -1.57485 | 0.027 | 0.311 | 0 FibroblasPira2         |
| 0 | -1.57632 | 0.031 | 0.357 | 0 FibroblasGlipr1        |
| 0 | -1.58406 | 0.026 | 0.379 | 0 FibroblasAB124611      |
| 0 | -1.58598 | 0.021 | 0.3   | 0 FibroblasCd2           |

|   |          |       |       |                     |
|---|----------|-------|-------|---------------------|
| 0 | -1.59592 | 0.251 | 0.47  | 0 FibroblasEfhd2    |
| 0 | -1.5978  | 0.08  | 0.315 | 0 FibroblasSatb1    |
| 0 | -1.60268 | 0.517 | 0.591 | 0 FibroblasZyx      |
| 0 | -1.6072  | 0.182 | 0.471 | 0 FibroblasMan2b1   |
| 0 | -1.61126 | 0.147 | 0.41  | 0 FibroblasDennd4a  |
| 0 | -1.61481 | 0.022 | 0.321 | 0 FibroblasMs4a6b   |
| 0 | -1.62028 | 0.549 | 0.625 | 0 FibroblasPrr13    |
| 0 | -1.62259 | 0.052 | 0.318 | 0 FibroblasSlc15a3  |
| 0 | -1.63437 | 0.025 | 0.265 | 0 FibroblasPtafr    |
| 0 | -1.64965 | 0.022 | 0.273 | 0 FibroblasIl1rn    |
| 0 | -1.65261 | 0.026 | 0.315 | 0 FibroblasSlpi     |
| 0 | -1.66198 | 0.037 | 0.297 | 0 FibroblasGimap6   |
| 0 | -1.66834 | 0.021 | 0.304 | 0 FibroblasGm5150   |
| 0 | -1.67732 | 0.022 | 0.27  | 0 FibroblasCd300ld  |
| 0 | -1.6841  | 0.029 | 0.29  | 0 FibroblasGcnt2    |
| 0 | -1.69567 | 0.023 | 0.294 | 0 FibroblasArg2     |
| 0 | -1.69725 | 0.535 | 0.604 | 0 FibroblasCdk2ap2  |
| 0 | -1.70341 | 0.035 | 0.409 | 0 FibroblasItgal    |
| 0 | -1.71201 | 0.042 | 0.451 | 0 FibroblasFyb      |
| 0 | -1.71501 | 0.797 | 0.823 | 0 FibroblasCyba     |
| 0 | -1.71602 | 0.044 | 0.3   | 0 FibroblasSh2d3c   |
| 0 | -1.72784 | 0.349 | 0.61  | 0 FibroblasGpsm3    |
| 0 | -1.74699 | 0.216 | 0.4   | 0 FibroblasEts1     |
| 0 | -1.76798 | 0.062 | 0.335 | 0 FibroblasPygl     |
| 0 | -1.76899 | 0.303 | 0.599 | 0 FibroblasVasp     |
| 0 | -1.77535 | 0.648 | 0.776 | 0 FibroblasLspl     |
| 0 | -1.77641 | 0.029 | 0.335 | 0 FibroblasNcf1     |
| 0 | -1.80353 | 0.216 | 0.484 | 0 FibroblasGlrX     |
| 0 | -1.82136 | 0.029 | 0.335 | 0 FibroblasCd33     |
| 0 | -1.83807 | 0.213 | 0.555 | 0 FibroblasSamhd1   |
| 0 | -1.84196 | 0.03  | 0.399 | 0 FibroblasSnx20    |
| 0 | -1.85055 | 0.122 | 0.559 | 0 FibroblasFam49b   |
| 0 | -1.85545 | 0.026 | 0.368 | 0 FibroblasJaml     |
| 0 | -1.86517 | 0.039 | 0.356 | 0 FibroblasCd24a    |
| 0 | -1.87325 | 0.315 | 0.682 | 0 FibroblasUcp2     |
| 0 | -1.87914 | 0.053 | 0.538 | 0 FibroblasArhgap45 |
| 0 | -1.89123 | 0.036 | 0.495 | 0 FibroblasCd37     |
| 0 | -1.89602 | 0.897 | 0.963 | 0 FibroblasPfn1     |
| 0 | -1.89729 | 0.036 | 0.504 | 0 FibroblasHcls1    |
| 0 | -1.91436 | 0.02  | 0.252 | 0 FibroblasRgs1     |
| 0 | -1.93725 | 0.03  | 0.359 | 0 FibroblasSlfn1    |
| 0 | -1.95148 | 0.081 | 0.535 | 0 FibroblasFam107b  |
| 0 | -1.95934 | 0.445 | 0.678 | 0 FibroblasPim1     |
| 0 | -1.96198 | 0.029 | 0.316 | 0 FibroblasSlc7a11  |
| 0 | -2.01825 | 0.545 | 0.729 | 0 FibroblasZfp3612  |
| 0 | -2.02815 | 0.725 | 0.824 | 0 FibroblasMcl1     |
| 0 | -2.04703 | 0.13  | 0.362 | 0 FibroblasStx11    |
| 0 | -2.05198 | 0.042 | 0.406 | 0 FibroblasPlek     |
| 0 | -2.05557 | 0.032 | 0.369 | 0 FibroblasPla2g7   |
| 0 | -2.0667  | 0.843 | 0.748 | 0 FibroblasS100a11  |
| 0 | -2.0701  | 0.042 | 0.534 | 0 FibroblasItgb2    |
| 0 | -2.07329 | 0.102 | 0.439 | 0 FibroblasTpd52    |
| 0 | -2.0812  | 0.038 | 0.526 | 0 FibroblasPtpn18   |
| 0 | -2.12637 | 0.033 | 0.365 | 0 FibroblasDusp2    |

|   |          |       |       |                    |
|---|----------|-------|-------|--------------------|
| 0 | -2.1283  | 0.038 | 0.501 | 0 FibroblasNcf4    |
| 0 | -2.13781 | 0.044 | 0.402 | 0 FibroblasAdam8   |
| 0 | -2.14753 | 0.033 | 0.432 | 0 FibroblasCd3d    |
| 0 | -2.16498 | 0.054 | 0.468 | 0 FibroblasSor11   |
| 0 | -2.19567 | 0.032 | 0.424 | 0 FibroblasFcgr3   |
| 0 | -2.21789 | 0.04  | 0.536 | 0 FibroblasTspan13 |
| 0 | -2.2275  | 0.043 | 0.429 | 0 FibroblasLilr4b  |
| 0 | -2.24134 | 0.04  | 0.506 | 0 FibroblasSell    |
| 0 | -2.24972 | 0.194 | 0.461 | 0 FibroblasEts2    |
| 0 | -2.25107 | 0.032 | 0.336 | 0 FibroblasRdh12   |
| 0 | -2.25422 | 0.045 | 0.495 | 0 FibroblasCxcr4   |
| 0 | -2.2551  | 0.026 | 0.29  | 0 FibroblasCd3g    |
| 0 | -2.27306 | 0.037 | 0.384 | 0 FibroblasCxcr2   |
| 0 | -2.2971  | 0.607 | 0.694 | 0 FibroblasTaldol  |
| 0 | -2.29777 | 0.209 | 0.477 | 0 FibroblasRnf149  |
| 0 | -2.29921 | 0.036 | 0.411 | 0 FibroblasCyp4f18 |
| 0 | -2.30133 | 0.026 | 0.262 | 0 FibroblasAcod1   |
| 0 | -2.30565 | 0.022 | 0.32  | 0 FibroblasMs4a4b  |
| 0 | -2.30654 | 0.086 | 0.516 | 0 FibroblasNeurl3  |
| 0 | -2.31033 | 0.094 | 0.635 | 0 FibroblasLimd2   |
| 0 | -2.32578 | 0.072 | 0.541 | 0 FibroblasRgs2    |
| 0 | -2.32658 | 0.041 | 0.599 | 0 FibroblasHcst    |
| 0 | -2.33297 | 0.035 | 0.398 | 0 FibroblasMcempl  |
| 0 | -2.33984 | 0.028 | 0.29  | 0 FibroblasHcar2   |
| 0 | -2.34369 | 0.268 | 0.659 | 0 FibroblasHmgb2   |
| 0 | -2.34968 | 0.022 | 0.3   | 0 FibroblasTrbc2   |
| 0 | -2.37487 | 0.039 | 0.547 | 0 FibroblasLtb     |
| 0 | -2.38361 | 0.113 | 0.536 | 0 FibroblasCd44    |
| 0 | -2.41118 | 0.035 | 0.416 | 0 FibroblasC5ar1   |
| 0 | -2.41853 | 0.053 | 0.618 | 0 FibroblasEmb     |
| 0 | -2.46246 | 0.038 | 0.466 | 0 FibroblasSpi1    |
| 0 | -2.49743 | 0.667 | 0.878 | 0 FibroblasFxyd5   |
| 0 | -2.50458 | 0.324 | 0.785 | 0 FibroblasCot11   |
| 0 | -2.5198  | 0.874 | 0.804 | 0 FibroblasCebpb   |
| 0 | -2.54281 | 0.05  | 0.576 | 0 FibroblasSlfn2   |
| 0 | -2.627   | 0.039 | 0.446 | 0 FibroblasCcr1    |
| 0 | -2.63142 | 0.04  | 0.398 | 0 FibroblasClec4e  |
| 0 | -2.64416 | 0.044 | 0.546 | 0 FibroblasSamsn1  |
| 0 | -2.6454  | 0.038 | 0.409 | 0 FibroblasTrem1   |
| 0 | -2.65665 | 0.056 | 0.742 | 0 FibroblasCd53    |
| 0 | -2.65993 | 0.148 | 0.482 | 0 FibroblasPlaur   |
| 0 | -2.68702 | 0.097 | 0.526 | 0 FibroblasLgals3  |
| 0 | -2.71317 | 0.047 | 0.489 | 0 FibroblasNcf2    |
| 0 | -2.72417 | 0.033 | 0.338 | 0 FibroblasMmp8    |
| 0 | -2.7257  | 0.052 | 0.728 | 0 FibroblasGmfg    |
| 0 | -2.7631  | 0.061 | 0.773 | 0 FibroblasLaptm5  |
| 0 | -2.77453 | 0.054 | 0.722 | 0 FibroblasCytip   |
| 0 | -2.8239  | 0.196 | 0.832 | 0 FibroblasArhgdib |
| 0 | -2.83753 | 0.081 | 0.733 | 0 FibroblasSelplg  |
| 0 | -2.84707 | 0.077 | 0.5   | 0 FibroblasLmnbl   |
| 0 | -2.85299 | 0.988 | 1     | 0 FibroblasTmsb4x  |
| 0 | -2.88347 | 0.043 | 0.442 | 0 FibroblasClec4d  |
| 0 | -2.90978 | 0.041 | 0.409 | 0 FibroblasMmp9    |
| 0 | -2.9162  | 0.132 | 0.582 | 0 FibroblasVps37b  |

|       |          |       |       |       |                     |
|-------|----------|-------|-------|-------|---------------------|
| 0     | -2.91658 | 0.145 | 0.454 | 0     | FibroblasSlc16a3    |
| 0     | -2.92085 | 0.035 | 0.358 | 0     | FibroblasWfdc21     |
| 0     | -2.95804 | 0.064 | 0.78  | 0     | FibroblasPtprc      |
| 0     | -2.98074 | 0.064 | 0.326 | 0     | FibroblasCd14       |
| 0     | -2.98119 | 0.145 | 0.788 | 0     | FibroblasStk17b     |
| 0     | -2.99869 | 0.06  | 0.52  | 0     | FibroblasPglyrp1    |
| 0     | -3.04776 | 0.047 | 0.461 | 0     | FibroblasCsf3r      |
| 0     | -3.05736 | 0.095 | 0.5   | 0     | FibroblasLst1       |
| 0     | -3.1012  | 0.041 | 0.296 | 0     | FibroblasLcn2       |
| 0     | -3.15752 | 0.026 | 0.26  | 0     | FibroblasCcl4       |
| 0     | -3.20593 | 0.054 | 0.533 | 0     | FibroblasAlox5ap    |
| 0     | -3.2229  | 0.06  | 0.739 | 0     | FibroblasLcp1       |
| 0     | -3.25481 | 0.05  | 0.465 | 0     | FibroblasHp         |
| 0     | -3.35006 | 0.048 | 0.446 | 0     | FibroblasHdc        |
| 0     | -3.35451 | 0.135 | 0.397 | 0     | FibroblasCcr12      |
| 0     | -3.37071 | 0.131 | 0.603 | 0     | FibroblasMxd1       |
| 0     | -3.40126 | 0.569 | 0.955 | 0     | FibroblasBtg1       |
| 0     | -3.41154 | 0.073 | 0.875 | 0     | FibroblasRac2       |
| 0     | -3.44219 | 0.071 | 0.88  | 0     | FibroblasCorola     |
| 0     | -3.53499 | 0.072 | 0.618 | 0     | FibroblasFcer1g     |
| 0     | -3.59092 | 0.057 | 0.498 | 0     | FibroblasCcl6       |
| 0     | -3.66291 | 0.058 | 0.453 | 0     | FibroblasIl1r2      |
| 0     | -3.67188 | 0.353 | 0.592 | 0     | FibroblasMsrbl      |
| 0     | -3.81998 | 0.066 | 0.38  | 0     | FibroblasCxcl2      |
| 0     | -3.95078 | 0.066 | 0.468 | 0     | FibroblasIl1b       |
| 0     | -4.13445 | 0.081 | 0.926 | 0     | FibroblasCd52       |
| 0     | -4.33378 | 0.082 | 0.645 | 0     | FibroblasTyrobp     |
| 0     | -4.6103  | 0.104 | 0.525 | 0     | FibroblasLyz2       |
| 0     | -4.73159 | 0.171 | 0.967 | 0     | FibroblasSrgn       |
| 0     | -4.93352 | 0.156 | 0.509 | 0     | FibroblasRetnlg     |
| 0     | -5.29074 | 0.366 | 0.646 | 0     | FibroblasS100a9     |
| 0     | -5.34894 | 0.31  | 0.633 | 0     | FibroblasS100a8     |
| ##### | -1.0893  | 0.077 | 0.254 | ##### | FibroblasH2-Q7      |
| ##### | -1.34842 | 0.124 | 0.301 | ##### | FibroblasOgfrl1     |
| ##### | -1.23396 | 0.147 | 0.324 | ##### | FibroblasTnfrsflb   |
| ##### | -1.40194 | 0.459 | 0.536 | ##### | FibroblasAdipor1    |
| ##### | -1.67641 | 0.115 | 0.292 | ##### | FibroblasMarcksl1   |
| ##### | -1.00974 | 0.105 | 0.279 | ##### | FibroblasD16Ert472e |
| ##### | -1.62779 | 0.217 | 0.381 | ##### | FibroblasNinjl      |
| ##### | -1.52081 | 0.235 | 0.392 | ##### | FibroblasEmilin2    |
| ##### | -1.27429 | 0.828 | 0.723 | ##### | FibroblasCtsd       |
| ##### | -1.03871 | 0.987 | 0.951 | ##### | FibroblasRps27      |
| ##### | -1.26807 | 0.592 | 0.596 | ##### | FibroblasMrpl33     |
| ##### | -1.09993 | 0.369 | 0.485 | ##### | FibroblasPtbp3      |
| ##### | -1.07004 | 0.091 | 0.257 | ##### | FibroblasAbtb1      |
| ##### | -1.83805 | 0.674 | 0.609 | ##### | FibroblasLitaf      |
| ##### | -1.36763 | 0.287 | 0.425 | ##### | Fibroblas 7-Mar     |
| ##### | -1.15174 | 0.343 | 0.463 | ##### | FibroblasMyh9       |
| ##### | -1.71436 | 0.202 | 0.37  | ##### | FibroblasTgfb1      |
| ##### | -1.22458 | 0.151 | 0.315 | ##### | FibroblasGpcpd1     |
| ##### | -1.09469 | 0.584 | 0.635 | ##### | FibroblasIer5       |
| ##### | -1.08789 | 0.091 | 0.252 | ##### | FibroblasHopx       |
| ##### | -1.48716 | 0.179 | 0.338 | ##### | FibroblasPlk3       |
| ##### | -1.15856 | 0.165 | 0.326 | ##### | FibroblasItpkb      |

|          |          |       |       |          |                        |
|----------|----------|-------|-------|----------|------------------------|
| #####    | -2.00328 | 0.12  | 0.277 | #####    | FibroblasBasp1         |
| #####    | -1.14651 | 0.731 | 0.652 | #####    | FibroblasH2afz         |
| #####    | -1.52188 | 0.3   | 0.419 | #####    | FibroblasNudt4         |
| #####    | -1.18089 | 0.591 | 0.579 | #####    | FibroblasPrdx6         |
| #####    | -1.15211 | 0.149 | 0.304 | #####    | FibroblasSeph2         |
| #####    | -2.06677 | 0.571 | 0.555 | #####    | FibroblasGrina         |
| #####    | -1.58338 | 0.762 | 0.681 | #####    | FibroblasH2-K1         |
| #####    | -1.55267 | 0.675 | 0.609 | #####    | FibroblasPrdx5         |
| #####    | -1.17531 | 0.183 | 0.331 | #####    | FibroblasCrlf3         |
| #####    | -1.51819 | 0.322 | 0.436 | #####    | Fibroblas2810474019Rik |
| #####    | -1.09111 | 0.996 | 0.982 | #####    | FibroblasFtl1          |
| #####    | -1.13097 | 0.126 | 0.272 | #####    | FibroblasLyst          |
| #####    | 2.721554 | 0.663 | 0.675 | #####    | FibroblasHbb-bs        |
| #####    | -1.30951 | 0.469 | 0.512 | #####    | FibroblasKlf3          |
| #####    | -1.10492 | 0.38  | 0.459 | #####    | FibroblasPtpn1         |
| #####    | -1.12798 | 0.381 | 0.465 | #####    | FibroblasPsm8          |
| #####    | -1.05149 | 0.331 | 0.427 | #####    | FibroblasGrb2          |
| #####    | -1.12663 | 0.231 | 0.347 | #####    | FibroblasPrkd          |
| #####    | -1.17743 | 0.234 | 0.347 | #####    | FibroblasPgd           |
| #####    | -1.32699 | 0.23  | 0.347 | #####    | FibroblasKctd12        |
| #####    | -1.12652 | 0.429 | 0.484 | #####    | FibroblasFosl2         |
| #####    | -1.33249 | 0.475 | 0.495 | #####    | FibroblasPicalm        |
| #####    | -1.05712 | 0.157 | 0.28  | #####    | FibroblasRilpl2        |
| #####    | -1.39523 | 0.313 | 0.396 | #####    | FibroblasSnap23        |
| #####    | -1.9174  | 0.21  | 0.329 | #####    | FibroblasIsg15         |
| #####    | -1.12533 | 0.168 | 0.279 | #####    | FibroblasDgat1         |
| #####    | -1.01776 | 0.442 | 0.467 | #####    | FibroblasEno1          |
| #####    | -1.44359 | 0.277 | 0.356 | #####    | FibroblasTmcc1         |
| #####    | -1.11835 | 0.435 | 0.458 | #####    | FibroblasFam32a        |
| #####    | -1.24866 | 0.16  | 0.259 | #####    | FibroblasCpne2         |
| #####    | -1.27519 | 0.222 | 0.302 | #####    | FibroblasFbx15         |
| #####    | -1.0206  | 0.193 | 0.283 | 2.73E-96 | FibroblasHist1hlc      |
| #####    | -1.02157 | 0.849 | 0.694 | 1.16E-95 | FibroblasTxn1          |
| 4.30E-99 | -1.21089 | 0.366 | 0.41  | 7.75E-95 | FibroblasTrib1         |
| 2.94E-97 | -1.16905 | 0.357 | 0.389 | 5.30E-93 | FibroblasCard19        |
| 4.31E-92 | -1.02625 | 0.312 | 0.366 | 7.77E-88 | FibroblasGm26532       |
| 1.19E-88 | -1.02331 | 0.386 | 0.403 | 2.15E-84 | FibroblasAtg3          |
| 2.44E-87 | -1.00743 | 0.486 | 0.468 | 4.40E-83 | FibroblasCox17         |
| 6.21E-82 | -1.08869 | 0.491 | 0.463 | 1.12E-77 | FibroblasAtp2b1        |
| 7.54E-75 | -1.12408 | 0.49  | 0.448 | 1.36E-70 | FibroblasEhd1          |
| 1.23E-72 | 2.700321 | 0.499 | 0.502 | 2.21E-68 | FibroblasHba-a1        |
| 2.19E-63 | -1.62809 | 0.203 | 0.273 | 3.94E-59 | FibroblasIfitm1        |
| 1.70E-45 | -1.07477 | 0.516 | 0.443 | 3.07E-41 | FibroblasNdel1         |
| 1.23E-39 | -1.3361  | 0.563 | 0.335 | 2.21E-35 | FibroblasAW112010      |
| 2.83E-15 | -1.03891 | 0.671 | 0.505 | 5.10E-11 | FibroblasUba52         |
| 4.73E-12 | -1.2601  | 0.766 | 0.614 | 8.51E-08 | FibroblasNfkb1a        |
| 2.08E-06 | -1.05842 | 0.945 | 0.585 | 0.037393 | FibroblasTmsb10        |
| 0        | 6.700779 | 0.996 | 0.363 | 0        | NeutrophilS100a9       |
| 0        | 6.634196 | 0.997 | 0.318 | 0        | NeutrophilS100a8       |
| 0        | 6.261991 | 0.931 | 0.157 | 0        | NeutrophilRetnlg       |
| 0        | 4.741311 | 0.931 | 0.058 | 0        | NeutrophilIl1r2        |
| 0        | 4.506433 | 0.909 | 0.079 | 0        | NeutrophilIl1b         |
| 0        | 4.459004 | 0.997 | 0.32  | 0        | NeutrophilMsrbl        |
| 0        | 4.323117 | 0.702 | 0.082 | 0        | NeutrophilCxcl2        |

|            |       |       |                      |
|------------|-------|-------|----------------------|
| 0 4.320239 | 0.744 | 0.126 | 0 NeutrophilCcr12    |
| 0 4.16906  | 0.601 | 0.042 | 0 NeutrophilLcn2     |
| 0 4.130272 | 0.905 | 0.068 | 0 NeutrophilHp       |
| 0 4.080699 | 0.943 | 0.052 | 0 NeutrophilCsf3r    |
| 0 4.060252 | 0.933 | 0.046 | 0 NeutrophilHdc      |
| 0 4.031788 | 0.962 | 0.191 | 0 NeutrophilMxd1     |
| 0 3.996888 | 0.999 | 0.174 | 0 NeutrophilTyrobp   |
| 0 3.994772 | 0.881 | 0.033 | 0 NeutrophilMmp9     |
| 0 3.902983 | 0.886 | 0.129 | 0 NeutrophilSlc16a3  |
| 0 3.881032 | 0.733 | 0.039 | 0 NeutrophilWfdc21   |
| 0 3.846859 | 0.896 | 0.051 | 0 NeutrophilClec4d   |
| 0 3.753147 | 0.389 | 0.019 | 0 NeutrophilGm5483   |
| 0 3.726112 | 0.9   | 0.094 | 0 NeutrophilCcl6     |
| 0 3.703324 | 0.914 | 0.104 | 0 NeutrophilLmnb1    |
| 0 3.692749 | 0.677 | 0.042 | 0 NeutrophilMmp8     |
| 0 3.631827 | 0.886 | 0.114 | 0 NeutrophilPgylrpl  |
| 0 3.626454 | 0.47  | 0.024 | 0 NeutrophilAsprv1   |
| 0 3.61754  | 0.838 | 0.044 | 0 NeutrophilTrem1    |
| 0 3.594053 | 0.913 | 0.116 | 0 NeutrophilLst1     |
| 0 3.447878 | 0.317 | 0.017 | 0 NeutrophilBC100530 |
| 0 3.446827 | 0.772 | 0.057 | 0 NeutrophilClec4e   |
| 0 3.444012 | 0.997 | 0.434 | 0 NeutrophilSrgn     |
| 0 3.439129 | 0.868 | 0.059 | 0 NeutrophilCcr1     |
| 0 3.434774 | 0.588 | 0.08  | 0 NeutrophilCd14     |
| 0 3.412294 | 0.883 | 0.087 | 0 NeutrophilNcf2     |
| 0 3.381675 | 0.998 | 0.795 | 0 NeutrophilCebpb    |
| 0 3.343582 | 0.963 | 0.096 | 0 NeutrophilAlox5ap  |
| 0 3.299537 | 0.604 | 0.029 | 0 NeutrophilHcar2    |
| 0 3.275318 | 0.825 | 0.031 | 0 NeutrophilCxcr2    |
| 0 3.270239 | 0.254 | 0.014 | 0 NeutrophilNgp      |
| 0 3.233205 | 0.827 | 0.049 | 0 NeutrophilC5ar1    |
| 0 3.228056 | 0.797 | 0.046 | 0 NeutrophilMccmpl   |
| 0 3.207092 | 0.702 | 0.032 | 0 NeutrophilRdh12    |
| 0 3.154955 | 0.934 | 0.459 | 0 NeutrophilGrina    |
| 0 3.148833 | 0.797 | 0.174 | 0 NeutrophilPlaur    |
| 0 3.121863 | 0.372 | 0.013 | 0 NeutrophilStfa211  |
| 0 3.100237 | 0.882 | 0.147 | 0 NeutrophilLyz2     |
| 0 3.099237 | 0.841 | 0.418 | 0 NeutrophilG0s2     |
| 0 3.080824 | 0.557 | 0.023 | 0 NeutrophilAcod1    |
| 0 3.08039  | 0.84  | 0.078 | 0 NeutrophilSpi1     |
| 0 3.074925 | 0.938 | 0.236 | 0 NeutrophilLcp1     |
| 0 3.069408 | 0.819 | 0.184 | 0 NeutrophilEts2     |
| 0 3.052166 | 0.809 | 0.207 | 0 NeutrophilRnf149   |
| 0 3.001    | 0.953 | 0.564 | 0 NeutrophilTaldol   |
| 0 2.99981  | 0.988 | 0.743 | 0 NeutrophilS100a11  |
| 0 2.98499  | 0.775 | 0.061 | 0 NeutrophilCyp4f18  |
| 0 2.982117 | 0.556 | 0.094 | 0 NeutrophilBaspl    |
| 0 2.933558 | 0.971 | 0.159 | 0 NeutrophilFcerlg   |
| 0 2.899048 | 0.667 | 0.123 | 0 NeutrophilStx11    |
| 0 2.886766 | 0.672 | 0.026 | 0 NeutrophilSlc7a11  |
| 0 2.74599  | 0.534 | 0.193 | 0 NeutrophilIsg15    |
| 0 2.744339 | 0.939 | 0.559 | 0 NeutrophilLitaf    |
| 0 2.700754 | 0.736 | 0.072 | 0 NeutrophilAdam8    |
| 0 2.687486 | 0.692 | 0.056 | 0 NeutrophilPla2g7   |

|             |        |        |                           |
|-------------|--------|--------|---------------------------|
| 0 2. 659686 | 0. 753 | 0. 115 | 0 NeutrophilSor11         |
| 0 2. 641471 | 0. 676 | 0. 038 | 0 NeutrophilCd33          |
| 0 2. 624053 | 0. 748 | 0. 13  | 0 NeutrophilTpd52         |
| 0 2. 613893 | 0. 675 | 0. 059 | 0 NeutrophilPygl          |
| 0 2. 600966 | 0. 643 | 0. 062 | 0 NeutrophilSlfn1         |
| 0 2. 551409 | 0. 618 | 0. 024 | 0 NeutrophilArg2          |
| 0 2. 541154 | 0. 572 | 0. 022 | 0 NeutrophilCd300ld       |
| 0 2. 53391  | 0. 507 | 0. 161 | 0 NeutrophilIfitm1        |
| 0 2. 518114 | 0. 592 | 0. 049 | 0 NeutrophilSh2d3c        |
| 0 2. 509524 | 0. 795 | 0. 184 | 0 NeutrophilCd44          |
| 0 2. 505116 | 0. 945 | 0. 725 | 0 NeutrophilMcl1          |
| 0 2. 502788 | 0. 742 | 0. 076 | 0 NeutrophilFcgr3         |
| 0 2. 491418 | 0. 774 | 0. 151 | 0 NeutrophilSamsn1        |
| 0 2. 491376 | 0. 721 | 0. 092 | 0 NeutrophilLilr4b        |
| 0 2. 484397 | 0. 744 | 0. 182 | 0 NeutrophilSlfn2         |
| 0 2. 450125 | 0. 544 | 0. 028 | 0 NeutrophilPtafr         |
| 0 2. 445022 | 0. 575 | 0. 038 | 0 NeutrophilGcnt2         |
| 0 2. 440467 | 0. 648 | 0. 065 | 0 NeutrophilCd24a         |
| 0 2. 428194 | 0. 395 | 0. 014 | 0 NeutrophilLy6g          |
| 0 2. 423938 | 0. 618 | 0. 053 | 0 NeutrophilNcf1          |
| 0 2. 421854 | 0. 971 | 0. 713 | 0 NeutrophilFxyd5         |
| 0 2. 415019 | 0. 751 | 0. 13  | 0 NeutrophilSell          |
| 0 2. 411064 | 0. 905 | 0. 332 | 0 NeutrophilStkl7b        |
| 0 2. 348378 | 0. 627 | 0. 07  | 0 NeutrophilJaml          |
| 0 2. 343661 | 0. 989 | 0. 691 | 0 NeutrophilBtgl          |
| 0 2. 338196 | 0. 74  | 0. 152 | 0 NeutrophilTspan13       |
| 0 2. 334896 | 0. 601 | 0. 063 | 0 NeutrophilSlc15a3       |
| 0 2. 327571 | 0. 487 | 0. 12  | 0 NeutrophilMarcks11      |
| 0 2. 3258   | 0. 724 | 0. 255 | 0 NeutrophilNudt4         |
| 0 2. 318508 | 0. 632 | 0. 202 | 0 NeutrophilNinjl         |
| 0 2. 316585 | 0. 552 | 0. 026 | 0 NeutrophilAnkrd33b      |
| 0 2. 314683 | 0. 642 | 0. 223 | 0 NeutrophilTmcc1         |
| 0 2. 310183 | 0. 855 | 0. 468 | 0 NeutrophilZyx           |
| 0 2. 300575 | 0. 717 | 0. 135 | 0 NeutrophilNcf4          |
| 0 2. 294068 | 0. 561 | 0. 02  | 0 NeutrophilAC110211. 1   |
| 0 2. 290709 | 0. 496 | 0. 017 | 0 NeutrophilFpr1          |
| 0 2. 286833 | 0. 584 | 0. 286 | 0 NeutrophilTnfaip2       |
| 0 2. 286405 | 0. 768 | 0. 28  | 0 NeutrophilTrib1         |
| 0 2. 281161 | 0. 489 | 0. 019 | 0 NeutrophilF630028010Rik |
| 0 2. 260094 | 0. 529 | 0. 036 | 0 NeutrophilIl1rn         |
| 0 2. 25238  | 0. 618 | 0. 106 | 0 NeutrophilPlek          |
| 0 2. 244399 | 0. 504 | 0. 042 | 0 NeutrophilCd93          |
| 0 2. 240642 | 0. 701 | 0. 255 | 0 NeutrophilSnap23        |
| 0 2. 23752  | 0. 564 | 0. 029 | 0 NeutrophilPilra         |
| 0 2. 236546 | 0. 978 | 0. 355 | 0 NeutrophilCd52          |
| 0 2. 235461 | 0. 572 | 0. 027 | 0 NeutrophilTrem3         |
| 0 2. 233603 | 0. 835 | 0. 352 | 0 NeutrophilHmgb2         |
| 0 2. 217427 | 0. 836 | 0. 588 | 0 NeutrophilPrdx5         |
| 0 2. 19364  | 0. 526 | 0. 06  | 0 NeutrophilEntpd1        |
| 0 2. 190823 | 0. 856 | 0. 247 | 0 NeutrophilGmfg          |
| 0 2. 181256 | 0. 556 | 0. 047 | 0 NeutrophilGm5150        |
| 0 2. 169782 | 0. 576 | 0. 106 | 0 NeutrophilSnx20         |
| 0 2. 164266 | 0. 593 | 0. 102 | 0 NeutrophilOgfr11        |
| 0 2. 156898 | 0. 34  | 0. 021 | 0 NeutrophilLrg1          |

|   |          |       |       |   |                         |
|---|----------|-------|-------|---|-------------------------|
| 0 | 2.134193 | 0.564 | 0.052 | 0 | NeutrophilPira2         |
| 0 | 2.129758 | 0.525 | 0.118 | 0 | NeutrophilCpne2         |
| 0 | 2.128137 | 0.567 | 0.069 | 0 | Neutrophil2310001H17Rik |
| 0 | 2.112875 | 0.683 | 0.192 | 0 | NeutrophilRgs2          |
| 0 | 2.105692 | 0.628 | 0.307 | 0 | Neutrophil2810474019Rik |
| 0 | 2.103909 | 0.931 | 0.333 | 0 | NeutrophilCorola        |
| 0 | 2.101892 | 0.687 | 0.205 | 0 | NeutrophilEmilin2       |
| 0 | 2.09195  | 0.787 | 0.414 | 0 | NeutrophilAdipor1       |
| 0 | 2.090106 | 0.536 | 0.039 | 0 | NeutrophilCd300a        |
| 0 | 2.089395 | 0.615 | 0.165 | 0 | NeutrophilCxcr4         |
| 0 | 2.076643 | 1     | 0.992 | 0 | NeutrophilTmsb4x        |
| 0 | 2.069745 | 0.423 | 0.042 | 0 | NeutrophilOsm           |
| 0 | 2.066279 | 0.86  | 0.268 | 0 | NeutrophilSelplg        |
| 0 | 2.050706 | 0.358 | 0.01  | 0 | NeutrophilMrgpra2b      |
| 0 | 2.037734 | 0.516 | 0.042 | 0 | NeutrophilCd300lf       |
| 0 | 2.033344 | 0.45  | 0.02  | 0 | NeutrophilChil1         |
| 0 | 2.032397 | 0.802 | 0.49  | 0 | NeutrophilPim1          |
| 0 | 2.026867 | 0.671 | 0.539 | 0 | NeutrophilCdk2ap2       |
| 0 | 2.024039 | 0.913 | 0.653 | 0 | NeutrophilLspl          |
| 0 | 2.01401  | 0.512 | 0.19  | 0 | NeutrophilFbxl5         |
| 0 | 2.00907  | 0.512 | 0.027 | 0 | NeutrophilThemis2       |
| 0 | 2.003979 | 0.535 | 0.178 | 0 | NeutrophilPlk3          |
| 0 | 2.000681 | 0.769 | 0.534 | 0 | NeutrophilPrr13         |
| 0 | 1.996082 | 0.561 | 0.085 | 0 | NeutrophilGlipr1        |
| 0 | 1.994022 | 0.777 | 0.391 | 0 | NeutrophilGpsm3         |
| 0 | 1.970568 | 0.69  | 0.25  | 0 | NeutrophilGlrX          |
| 0 | 1.966605 | 0.707 | 0.338 | 0 | NeutrophilRhog          |
| 0 | 1.964844 | 0.906 | 0.516 | 0 | NeutrophilCd9           |
| 0 | 1.958638 | 0.935 | 0.807 | 0 | NeutrophilMap1lc3b      |
| 0 | 1.955519 | 0.998 | 0.995 | 0 | NeutrophilFth1          |
| 0 | 1.955203 | 0.573 | 0.284 | 0 | NeutrophilJdp2          |
| 0 | 1.954349 | 0.718 | 0.414 | 0 | NeutrophilNdel1         |
| 0 | 1.942471 | 0.422 | 0.045 | 0 | NeutrophilTlr2          |
| 0 | 1.940311 | 0.898 | 0.739 | 0 | NeutrophilTxn1          |
| 0 | 1.938693 | 0.492 | 0.036 | 0 | NeutrophilNfam1         |
| 0 | 1.92912  | 0.717 | 0.419 | 0 | NeutrophilPicalm        |
| 0 | 1.923835 | 0.551 | 0.213 | 0 | NeutrophilKctd12        |
| 0 | 1.915737 | 0.575 | 0.051 | 0 | NeutrophilSlpi          |
| 0 | 1.891078 | 0.398 | 0.026 | 0 | NeutrophilNlrp3         |
| 0 | 1.883962 | 0.916 | 0.336 | 0 | NeutrophilRac2          |
| 0 | 1.874557 | 0.832 | 0.294 | 0 | NeutrophilPtprc         |
| 0 | 1.871514 | 0.897 | 0.743 | 0 | NeutrophilCtsd          |
| 0 | 1.851032 | 1     | 0.986 | 0 | NeutrophilFtl1          |
| 0 | 1.819539 | 0.422 | 0.023 | 0 | NeutrophilFpr2          |
| 0 | 1.812348 | 0.571 | 0.21  | 0 | NeutrophilPgd           |
| 0 | 1.811237 | 0.753 | 0.208 | 0 | NeutrophilEmb           |
| 0 | 1.810776 | 0.703 | 0.43  | 0 | NeutrophilKlf3          |
| 0 | 1.806697 | 0.552 | 0.097 | 0 | NeutrophilAB124611      |
| 0 | 1.805756 | 0.998 | 0.969 | 0 | NeutrophilActg1         |
| 0 | 1.802709 | 0.356 | 0.012 | 0 | NeutrophilPtgs2os2      |
| 0 | 1.796272 | 0.429 | 0.056 | 0 | NeutrophilSlc2a3        |
| 0 | 1.792711 | 0.5   | 0.091 | 0 | NeutrophilCsf2ra        |
| 0 | 1.787418 | 0.578 | 0.29  | 0 | Neutrophil 7-Mar        |
| 0 | 1.7848   | 0.419 | 0.089 | 0 | NeutrophilRab20         |



|   |          |       |       |   |                     |
|---|----------|-------|-------|---|---------------------|
| 0 | 1.783859 | 0.385 | 0.089 | 0 | NeutrophilDuspl6    |
| 0 | 1.778226 | 0.625 | 0.161 | 0 | NeutrophilHcls1     |
| 0 | 1.774181 | 0.488 | 0.115 | 0 | NeutrophilLyst      |
| 0 | 1.773834 | 0.68  | 0.41  | 0 | NeutrophilEhd1      |
| 0 | 1.772273 | 0.412 | 0.015 | 0 | NeutrophilDhrs9     |
| 0 | 1.767838 | 0.663 | 0.174 | 0 | NeutrophilItgb2     |
| 0 | 1.765643 | 0.579 | 0.314 | 0 | NeutrophilCard19    |
| 0 | 1.763612 | 0.85  | 0.463 | 0 | NeutrophilCotl1     |
| 0 | 1.763167 | 0.441 | 0.032 | 0 | NeutrophilLpcat2    |
| 0 | 1.759436 | 0.278 | 0.041 | 0 | NeutrophilIfitm6    |
| 0 | 1.754142 | 0.377 | 0.037 | 0 | NeutrophilSlc40a1   |
| 0 | 1.748512 | 0.677 | 0.296 | 0 | NeutrophilSamhd1    |
| 0 | 1.748094 | 0.452 | 0.041 | 0 | NeutrophilFgr       |
| 0 | 1.745808 | 0.44  | 0.104 | 0 | NeutrophilRabgef1   |
| 0 | 1.742606 | 0.931 | 0.775 | 0 | NeutrophilCyba      |
| 0 | 1.739175 | 0.565 | 0.168 | 0 | NeutrophilVsr       |
| 0 | 1.73425  | 0.605 | 0.243 | 0 | NeutrophilMan2b1    |
| 0 | 1.733581 | 0.66  | 0.386 | 0 | NeutrophilFam32a    |
| 0 | 1.730755 | 0.75  | 0.528 | 0 | NeutrophilIqgap1    |
| 0 | 1.713521 | 0.759 | 0.6   | 0 | NeutrophilRab7      |
| 0 | 1.710324 | 0.532 | 0.203 | 0 | NeutrophilDennd4a   |
| 0 | 1.709777 | 0.699 | 0.376 | 0 | NeutrophilVasp      |
| 0 | 1.704322 | 0.492 | 0.149 | 0 | NeutrophilSeps2     |
| 0 | 1.703355 | 0.652 | 0.194 | 0 | NeutrophilNeurl3    |
| 0 | 1.700404 | 0.514 | 0.085 | 0 | NeutrophilMyolf     |
| 0 | 1.691825 | 0.605 | 0.288 | 0 | NeutrophilEfhd2     |
| 0 | 1.683851 | 0.484 | 0.159 | 0 | NeutrophilGpcpd1    |
| 0 | 1.67366  | 0.461 | 0.09  | 0 | NeutrophilAbtb1     |
| 0 | 1.669097 | 0.426 | 0.033 | 0 | NeutrophilHck       |
| 0 | 1.663112 | 0.408 | 0.043 | 0 | NeutrophilActa2     |
| 0 | 1.661538 | 0.768 | 0.545 | 0 | NeutrophilMrpl33    |
| 0 | 1.661242 | 0.782 | 0.529 | 0 | NeutrophilOstf1     |
| 0 | 1.651516 | 0.802 | 0.593 | 0 | NeutrophilCap1      |
| 0 | 1.651181 | 0.506 | 0.107 | 0 | NeutrophilLyn       |
| 0 | 1.649459 | 0.434 | 0.045 | 0 | NeutrophilPirb      |
| 0 | 1.644257 | 0.894 | 0.675 | 0 | NeutrophilNeat1     |
| 0 | 1.640784 | 0.833 | 0.413 | 0 | NeutrophilArhgdib   |
| 0 | 1.639006 | 0.411 | 0.055 | 0 | NeutrophilRin3      |
| 0 | 1.63866  | 0.419 | 0.086 | 0 | NeutrophilSlc27a4   |
| 0 | 1.636442 | 0.598 | 0.336 | 0 | NeutrophilAtg3      |
| 0 | 1.634965 | 0.42  | 0.049 | 0 | NeutrophilHacd4     |
| 0 | 1.63399  | 0.462 | 0.087 | 0 | NeutrophilSkap2     |
| 0 | 1.632825 | 0.457 | 0.103 | 0 | NeutrophilRassf3    |
| 0 | 1.630393 | 0.758 | 0.272 | 0 | NeutrophilCytip     |
| 0 | 1.617709 | 0.774 | 0.281 | 0 | NeutrophilCd53      |
| 0 | 1.613249 | 0.387 | 0.04  | 0 | NeutrophilLrrc25    |
| 0 | 1.611093 | 0.387 | 0.036 | 0 | NeutrophilRab11fip1 |
| 0 | 1.60335  | 0.633 | 0.433 | 0 | NeutrophilDhrs7     |
| 0 | 1.600569 | 0.363 | 0.014 | 0 | NeutrophilTrpm2     |
| 0 | 1.598435 | 0.375 | 0.021 | 0 | NeutrophilCd300lb   |
| 0 | 1.592505 | 0.512 | 0.201 | 0 | NeutrophilSirpa     |
| 0 | 1.584981 | 0.412 | 0.105 | 0 | NeutrophilFem1c     |
| 0 | 1.57819  | 0.59  | 0.413 | 0 | NeutrophilR3hdm4    |
| 0 | 1.573841 | 0.435 | 0.059 | 0 | NeutrophilItgam     |

|   |          |       |       |   |                         |
|---|----------|-------|-------|---|-------------------------|
| 0 | 1.569291 | 0.443 | 0.095 | 0 | NeutrophilSyk           |
| 0 | 1.569044 | 0.531 | 0.2   | 0 | NeutrophilFmnl1         |
| 0 | 1.5683   | 0.984 | 0.943 | 0 | NeutrophilH3f3a         |
| 0 | 1.560017 | 0.315 | 0.025 | 0 | NeutrophilCd177         |
| 0 | 1.558255 | 0.788 | 0.637 | 0 | NeutrophilSdcbp         |
| 0 | 1.548206 | 0.715 | 0.55  | 0 | NeutrophilPtp4a1        |
| 0 | 1.545441 | 0.427 | 0.164 | 0 | NeutrophilDgat1         |
| 0 | 1.539779 | 0.422 | 0.049 | 0 | NeutrophilDok3          |
| 0 | 1.536782 | 0.42  | 0.095 | 0 | NeutrophilCfap43        |
| 0 | 1.520741 | 0.534 | 0.264 | 0 | NeutrophilGda           |
| 0 | 1.516456 | 0.454 | 0.092 | 0 | NeutrophilPtpn6         |
| 0 | 1.514048 | 0.504 | 0.136 | 0 | NeutrophilItgal         |
| 0 | 1.50152  | 0.512 | 0.315 | 0 | NeutrophilKpna4         |
| 0 | 1.492836 | 0.816 | 0.65  | 0 | NeutrophilArpc5         |
| 0 | 1.477905 | 0.296 | 0.009 | 0 | NeutrophilIl1f9         |
| 0 | 1.471874 | 0.307 | 0.061 | 0 | NeutrophilOsgin1        |
| 0 | 1.471268 | 0.303 | 0.02  | 0 | NeutrophilCd300c2       |
| 0 | 1.466003 | 0.323 | 0.031 | 0 | NeutrophilMirt1         |
| 0 | 1.460676 | 0.357 | 0.045 | 0 | NeutrophilSt3gal5       |
| 0 | 1.455177 | 0.834 | 0.674 | 0 | NeutrophilYpel3         |
| 0 | 1.449589 | 0.336 | 0.046 | 0 | NeutrophilCsf2rb        |
| 0 | 1.44553  | 0.339 | 0.022 | 0 | NeutrophilSlc2a6        |
| 0 | 1.443796 | 0.998 | 0.991 | 0 | NeutrophilActb          |
| 0 | 1.442841 | 0.424 | 0.179 | 0 | NeutrophilTnfrsf1b      |
| 0 | 1.436888 | 0.481 | 0.231 | 0 | NeutrophilCcpg1         |
| 0 | 1.430331 | 0.473 | 0.262 | 0 | NeutrophilAntxr2        |
| 0 | 1.429879 | 0.557 | 0.285 | 0 | NeutrophilLrrfip1       |
| 0 | 1.417777 | 0.368 | 0.038 | 0 | NeutrophilClec4a2       |
| 0 | 1.409424 | 0.69  | 0.488 | 0 | NeutrophilDazap2        |
| 0 | 1.401437 | 0.651 | 0.49  | 0 | NeutrophilTnfrsf1a      |
| 0 | 1.395075 | 0.859 | 0.791 | 0 | NeutrophilArpc3         |
| 0 | 1.391711 | 0.289 | 0.028 | 0 | NeutrophilMpzl3         |
| 0 | 1.386552 | 0.96  | 0.837 | 0 | NeutrophilS100a6        |
| 0 | 1.381219 | 0.53  | 0.268 | 0 | NeutrophilGrk2          |
| 0 | 1.375838 | 0.632 | 0.28  | 0 | NeutrophilLimd2         |
| 0 | 1.374406 | 0.45  | 0.176 | 0 | NeutrophilActn1         |
| 0 | 1.371734 | 0.382 | 0.093 | 0 | NeutrophilRetreg1       |
| 0 | 1.367727 | 0.328 | 0.02  | 0 | NeutrophilRasgrp4       |
| 0 | 1.361998 | 0.745 | 0.571 | 0 | NeutrophilIer5          |
| 0 | 1.351048 | 0.494 | 0.229 | 0 | NeutrophilPrkcd         |
| 0 | 1.346475 | 0.273 | 0.016 | 0 | Neutrophil1600010M07Rik |
| 0 | 1.344931 | 0.297 | 0.015 | 0 | NeutrophilFcgr4         |
| 0 | 1.342828 | 0.338 | 0.083 | 0 | NeutrophilAdrb2         |
| 0 | 1.331603 | 0.476 | 0.276 | 0 | NeutrophilZcchc6        |
| 0 | 1.32955  | 0.256 | 0.013 | 0 | Neutrophil4833407H14Rik |
| 0 | 1.328975 | 0.299 | 0.014 | 0 | NeutrophilA530064D06Rik |
| 0 | 1.325792 | 0.548 | 0.36  | 0 | NeutrophilMyh9          |
| 0 | 1.324889 | 0.408 | 0.135 | 0 | NeutrophilChd7          |
| 0 | 1.324486 | 0.615 | 0.411 | 0 | NeutrophilFosl2         |
| 0 | 1.321838 | 0.409 | 0.106 | 0 | NeutrophilCd84          |
| 0 | 1.317287 | 0.324 | 0.089 | 0 | NeutrophilSgms2         |
| 0 | 1.316326 | 0.91  | 0.868 | 0 | NeutrophilGnai2         |
| 0 | 1.312819 | 0.282 | 0.008 | 0 | NeutrophilCeacam10      |
| 0 | 1.301758 | 0.289 | 0.01  | 0 | NeutrophilKlra17        |

|   |          |       |       |   |                        |
|---|----------|-------|-------|---|------------------------|
| 0 | 1.296013 | 0.59  | 0.201 | 0 | NeutrophilTb           |
| 0 | 1.288084 | 0.862 | 0.727 | 0 | NeutrophilIfitm2       |
| 0 | 1.28637  | 0.838 | 0.778 | 0 | NeutrophiPkm           |
| 0 | 1.282873 | 0.592 | 0.262 | 0 | NeutrophiFam49b        |
| 0 | 1.277248 | 0.653 | 0.208 | 0 | NeutrophiLgals3        |
| 0 | 1.276243 | 0.289 | 0.014 | 0 | NeutrophiPilrb2        |
| 0 | 1.275953 | 0.25  | 0.011 | 0 | NeutrophiSlfn4         |
| 0 | 1.261843 | 0.301 | 0.052 | 0 | NeutrophiDck           |
| 0 | 1.261597 | 0.728 | 0.592 | 0 | NeutrophiH2afj         |
| 0 | 1.257301 | 0.281 | 0.017 | 0 | NeutrophiTlr13         |
| 0 | 1.256328 | 0.291 | 0.028 | 0 | NeutrophiIgsf6         |
| 0 | 1.253336 | 0.522 | 0.337 | 0 | NeutrophiGrb2          |
| 0 | 1.251062 | 0.667 | 0.46  | 0 | NeutrophiCnn2          |
| 0 | 1.246994 | 0.378 | 0.142 | 0 | NeutrophiSlc6a6        |
| 0 | 1.246624 | 0.953 | 0.788 | 0 | NeutrophiDusp1         |
| 0 | 1.243756 | 0.581 | 0.369 | 0 | NeutrophiPpplr18       |
| 0 | 1.243211 | 0.729 | 0.654 | 0 | NeutrophiAtp6vlg1      |
| 0 | 1.235746 | 0.43  | 0.193 | 0 | NeutrophiAtp11b        |
| 0 | 1.233754 | 0.282 | 0.016 | 0 | NeutrophiNfe2          |
| 0 | 1.230342 | 0.302 | 0.102 | 0 | NeutrophiSlc22a15      |
| 0 | 1.228992 | 0.286 | 0.014 | 0 | NeutrophiPadi4         |
| 0 | 1.22679  | 0.7   | 0.561 | 0 | NeutrophiClk1          |
| 0 | 1.225364 | 0.42  | 0.166 | 0 | NeutrophiSlc9a3r1      |
| 0 | 1.224734 | 0.935 | 0.856 | 0 | NeutrophiGabarap       |
| 0 | 1.213486 | 0.27  | 0.062 | 0 | NeutrophiCcl3          |
| 0 | 1.213451 | 0.751 | 0.664 | 0 | NeutrophiUbe2b         |
| 0 | 1.197885 | 0.734 | 0.316 | 0 | NeutrophiLaptm5        |
| 0 | 1.195034 | 0.363 | 0.143 | 0 | NeutrophiPnkp          |
| 0 | 1.193876 | 0.307 | 0.053 | 0 | NeutrophiMir142hg      |
| 0 | 1.191094 | 0.257 | 0.008 | 0 | Neutrophi9830107B12Rik |
| 0 | 1.178984 | 0.278 | 0.035 | 0 | NeutrophiSirpblb       |
| 0 | 1.174676 | 0.308 | 0.079 | 0 | NeutrophiMsra          |
| 0 | 1.173512 | 0.458 | 0.231 | 0 | NeutrophiAnkrd44       |
| 0 | 1.167092 | 0.977 | 0.915 | 0 | NeutrophiPfn1          |
| 0 | 1.165174 | 0.719 | 0.594 | 0 | NeutrophiActr3         |
| 0 | 1.156208 | 0.34  | 0.11  | 0 | NeutrophiUnc119        |
| 0 | 1.156137 | 0.477 | 0.205 | 0 | NeutrophiCd82          |
| 0 | 1.154806 | 0.848 | 0.799 | 0 | NeutrophiMy112b        |
| 0 | 1.15013  | 0.25  | 0.067 | 0 | NeutrophiAcsl1         |
| 0 | 1.147172 | 0.251 | 0.031 | 0 | NeutrophiDgat2         |
| 0 | 1.131336 | 0.463 | 0.178 | 0 | NeutrophiFyb           |
| 0 | 1.126716 | 0.277 | 0.054 | 0 | NeutrophiCybb          |
| 0 | 1.126244 | 0.297 | 0.093 | 0 | NeutrophiRnf144a       |
| 0 | 1.125291 | 0.252 | 0.016 | 0 | NeutrophiLilra6        |
| 0 | 1.12222  | 0.77  | 0.664 | 0 | NeutrophiGpx1          |
| 0 | 1.118977 | 0.316 | 0.101 | 0 | NeutrophiFes           |
| 0 | 1.116089 | 0.861 | 0.822 | 0 | NeutrophiGng5          |
| 0 | 1.102342 | 0.608 | 0.229 | 0 | NeutrophiHcst          |
| 0 | 1.10223  | 0.262 | 0.012 | 0 | NeutrophiAlox5         |
| 0 | 1.092289 | 0.865 | 0.796 | 0 | NeutrophiArpc2         |
| 0 | 1.089892 | 0.281 | 0.082 | 0 | NeutrophiAtg2a         |
| 0 | 1.086258 | 0.366 | 0.127 | 0 | NeutrophiInpp5d        |
| 0 | 1.079788 | 0.296 | 0.076 | 0 | NeutrophiPtpre         |
| 0 | 1.072945 | 0.334 | 0.092 | 0 | NeutrophiPstpip1       |

|   |          |       |       |   |                   |
|---|----------|-------|-------|---|-------------------|
| 0 | 1.067772 | 0.252 | 0.014 | 0 | NeutrophilMctpl   |
| 0 | 1.059818 | 0.29  | 0.062 | 0 | NeutrophilSema4d  |
| 0 | 1.05809  | 0.848 | 0.742 | 0 | NeutrophilSat1    |
| 0 | 1.051294 | 0.255 | 0.023 | 0 | NeutrophilTarm1   |
| 0 | 1.050443 | 0.606 | 0.193 | 0 | NeutrophilTgfbi   |
| 0 | 1.038948 | 0.27  | 0.047 | 0 | NeutrophilPlbd1   |
| 0 | 1.023086 | 0.323 | 0.097 | 0 | NeutrophilArhgap9 |
| 0 | 1.020478 | 0.87  | 0.725 | 0 | NeutrophilAnxa2   |
| 0 | 1.005996 | 0.305 | 0.092 | 0 | NeutrophilMap4k2  |
| 0 | 1.001766 | 0.3   | 0.087 | 0 | NeutrophilSema4a  |
| 0 | -1.0013  | 0.042 | 0.517 | 0 | NeutrophilPhb2    |
| 0 | -1.00332 | 0.003 | 0.33  | 0 | NeutrophilThbs2   |
| 0 | -1.00346 | 0.004 | 0.395 | 0 | NeutrophilTubb6   |
| 0 | -1.00706 | 0.066 | 0.556 | 0 | NeutrophilCct7    |
| 0 | -1.00726 | 0.161 | 0.68  | 0 | NeutrophilSrsf3   |
| 0 | -1.00842 | 0.004 | 0.383 | 0 | NeutrophilAkap12  |
| 0 | -1.00862 | 0.013 | 0.455 | 0 | NeutrophilPolr2m  |
| 0 | -1.00886 | 0.018 | 0.477 | 0 | NeutrophilTomm5   |
| 0 | -1.00908 | 0.009 | 0.437 | 0 | NeutrophilCnpy2   |
| 0 | -1.0095  | 0.015 | 0.465 | 0 | NeutrophilTcpl    |
| 0 | -1.01038 | 0.004 | 0.365 | 0 | NeutrophilVcan    |
| 0 | -1.01073 | 0.112 | 0.617 | 0 | NeutrophilPolr1d  |
| 0 | -1.01084 | 0.035 | 0.479 | 0 | NeutrophilDek     |
| 0 | -1.01176 | 0.003 | 0.392 | 0 | NeutrophilRbpms   |
| 0 | -1.01257 | 0.037 | 0.51  | 0 | NeutrophilPsm4    |
| 0 | -1.01293 | 0.007 | 0.412 | 0 | NeutrophilBmp1    |
| 0 | -1.01524 | 0.045 | 0.54  | 0 | NeutrophilEmc7    |
| 0 | -1.01596 | 0.005 | 0.399 | 0 | NeutrophilKdelr3  |
| 0 | -1.01722 | 0.163 | 0.692 | 0 | NeutrophilSmdt1   |
| 0 | -1.01741 | 0.022 | 0.466 | 0 | NeutrophilFkbp3   |
| 0 | -1.01847 | 0.022 | 0.443 | 0 | NeutrophilBola2   |
| 0 | -1.01985 | 0.042 | 0.526 | 0 | NeutrophilSsb     |
| 0 | -1.01993 | 0.113 | 0.624 | 0 | NeutrophilArl6ip5 |
| 0 | -1.02025 | 0.033 | 0.495 | 0 | NeutrophilRom1    |
| 0 | -1.02139 | 0.018 | 0.379 | 0 | NeutrophilAblim1  |
| 0 | -1.02277 | 0.011 | 0.395 | 0 | NeutrophilTmem64  |
| 0 | -1.02333 | 0.004 | 0.393 | 0 | NeutrophilClra    |
| 0 | -1.02414 | 0.003 | 0.385 | 0 | NeutrophilAbi3bp  |
| 0 | -1.02416 | 0.033 | 0.475 | 0 | NeutrophilAtplal  |
| 0 | -1.02492 | 0.011 | 0.458 | 0 | NeutrophilTmem109 |
| 0 | -1.02558 | 0.013 | 0.458 | 0 | NeutrophilAkr1b3  |
| 0 | -1.0263  | 0.044 | 0.473 | 0 | NeutrophilHnrnpa1 |
| 0 | -1.02828 | 0.006 | 0.397 | 0 | NeutrophilF2r     |
| 0 | -1.02908 | 0.005 | 0.427 | 0 | NeutrophilSgce    |
| 0 | -1.03349 | 0.221 | 0.749 | 0 | NeutrophilAtp5c1  |
| 0 | -1.03363 | 0.002 | 0.393 | 0 | NeutrophilMmp14   |
| 0 | -1.03453 | 0.003 | 0.387 | 0 | NeutrophilAr      |
| 0 | -1.03462 | 0.003 | 0.42  | 0 | NeutrophilMaged1  |
| 0 | -1.03601 | 0.04  | 0.526 | 0 | NeutrophilCct8    |
| 0 | -1.03627 | 0.241 | 0.775 | 0 | NeutrophilCox7a2l |
| 0 | -1.03644 | 0.005 | 0.39  | 0 | NeutrophilMatn2   |
| 0 | -1.03823 | 0.169 | 0.721 | 0 | NeutrophilNdufa6  |
| 0 | -1.03972 | 0.172 | 0.703 | 0 | NeutrophilPsm4    |
| 0 | -1.04069 | 0.005 | 0.378 | 0 | NeutrophilTbx20   |

|   |          |       |       |                     |
|---|----------|-------|-------|---------------------|
| 0 | -1.0412  | 0.005 | 0.265 | 0 NeutrophilMeox1   |
| 0 | -1.04217 | 0.013 | 0.458 | 0 NeutrophilFkbp2   |
| 0 | -1.04551 | 0.025 | 0.49  | 0 NeutrophilPsmc7   |
| 0 | -1.0457  | 0.211 | 0.735 | 0 NeutrophilSec62   |
| 0 | -1.04584 | 0.059 | 0.55  | 0 NeutrophilCanx    |
| 0 | -1.05024 | 0.026 | 0.488 | 0 NeutrophilImpdh2  |
| 0 | -1.05044 | 0.857 | 0.961 | 0 NeutrophilJund    |
| 0 | -1.05066 | 0.025 | 0.505 | 0 NeutrophilDdrgk1  |
| 0 | -1.0517  | 0.004 | 0.413 | 0 NeutrophilColec12 |
| 0 | -1.05445 | 0.006 | 0.39  | 0 NeutrophilAldh1a1 |
| 0 | -1.05459 | 0.181 | 0.647 | 0 NeutrophilRrbp1   |
| 0 | -1.05619 | 0.091 | 0.624 | 0 NeutrophilRnf187  |
| 0 | -1.05836 | 0.004 | 0.414 | 0 NeutrophilPlpp1   |
| 0 | -1.05908 | 0.03  | 0.532 | 0 NeutrophilPdcd5   |
| 0 | -1.06037 | 0.014 | 0.447 | 0 NeutrophilP4ha1   |
| 0 | -1.06068 | 0.092 | 0.626 | 0 NeutrophilSpcs2   |
| 0 | -1.06162 | 0.104 | 0.522 | 0 NeutrophilH2-Q4   |
| 0 | -1.06407 | 0.017 | 0.483 | 0 NeutrophilBcl7c   |
| 0 | -1.06696 | 0.016 | 0.313 | 0 NeutrophilHk2     |
| 0 | -1.06704 | 0.017 | 0.325 | 0 NeutrophilBcl2    |
| 0 | -1.06956 | 0.485 | 0.834 | 0 NeutrophilDnaj1   |
| 0 | -1.06977 | 0.003 | 0.371 | 0 NeutrophilCp      |
| 0 | -1.07252 | 0.01  | 0.466 | 0 NeutrophilMrpl23  |
| 0 | -1.07417 | 0.466 | 0.903 | 0 NeutrophilChchd2  |
| 0 | -1.07536 | 0.017 | 0.478 | 0 NeutrophilHexb    |
| 0 | -1.07569 | 0.476 | 0.915 | 0 NeutrophilCox4i1  |
| 0 | -1.07653 | 0.003 | 0.406 | 0 NeutrophilPpic    |
| 0 | -1.07729 | 0.004 | 0.43  | 0 NeutrophilNpdc1   |
| 0 | -1.07983 | 0.099 | 0.514 | 0 NeutrophilGlul    |
| 0 | -1.08059 | 0.004 | 0.443 | 0 NeutrophilGpx8    |
| 0 | -1.08152 | 0.003 | 0.418 | 0 NeutrophilSteap3  |
| 0 | -1.08495 | 0.005 | 0.337 | 0 NeutrophilVcam1   |
| 0 | -1.08561 | 0.085 | 0.606 | 0 NeutrophilCope    |
| 0 | -1.08582 | 0.163 | 0.684 | 0 NeutrophilNcl     |
| 0 | -1.08695 | 0.011 | 0.485 | 0 NeutrophilFundc2  |
| 0 | -1.087   | 0.058 | 0.558 | 0 NeutrophilSelenos |
| 0 | -1.08826 | 0.009 | 0.431 | 0 NeutrophilCyth3   |
| 0 | -1.08972 | 0.099 | 0.633 | 0 NeutrophilEif2s2  |
| 0 | -1.09552 | 0.005 | 0.43  | 0 NeutrophilLpar1   |
| 0 | -1.09769 | 0.005 | 0.439 | 0 NeutrophilTpst1   |
| 0 | -1.09898 | 0.003 | 0.388 | 0 NeutrophilMaged2  |
| 0 | -1.10065 | 0.005 | 0.425 | 0 NeutrophilNdn     |
| 0 | -1.10142 | 0.027 | 0.439 | 0 NeutrophilBst2    |
| 0 | -1.10184 | 0.009 | 0.434 | 0 NeutrophilClic4   |
| 0 | -1.10268 | 0.004 | 0.418 | 0 NeutrophilGngl1   |
| 0 | -1.10612 | 0.005 | 0.427 | 0 NeutrophilSnhg18  |
| 0 | -1.10721 | 0.032 | 0.517 | 0 NeutrophilAtraid  |
| 0 | -1.11061 | 0.003 | 0.38  | 0 NeutrophilFrzb    |
| 0 | -1.11081 | 0.079 | 0.6   | 0 NeutrophilOstc    |
| 0 | -1.11245 | 0.018 | 0.475 | 0 NeutrophilTceal9  |
| 0 | -1.11588 | 0.003 | 0.382 | 0 NeutrophilLoxl2   |
| 0 | -1.11593 | 0.004 | 0.371 | 0 NeutrophilCol14a1 |
| 0 | -1.11598 | 0.243 | 0.748 | 0 NeutrophilArf4    |
| 0 | -1.1191  | 0.094 | 0.637 | 0 NeutrophilSpcs1   |

|   |          |       |       |                           |
|---|----------|-------|-------|---------------------------|
| 0 | -1.11944 | 0.005 | 0.461 | 0 NeutrophilPrdx4         |
| 0 | -1.12001 | 0.012 | 0.436 | 0 NeutrophilNrip1         |
| 0 | -1.12643 | 0.027 | 0.521 | 0 NeutrophilHdgf          |
| 0 | -1.1271  | 0.011 | 0.428 | 0 NeutrophilHegl          |
| 0 | -1.12728 | 0.052 | 0.558 | 0 NeutrophilErgic3        |
| 0 | -1.12873 | 0.005 | 0.439 | 0 NeutrophilVat1          |
| 0 | -1.1299  | 0.141 | 0.7   | 0 Neutrophil2010107E04Rik |
| 0 | -1.13125 | 0.038 | 0.533 | 0 NeutrophilNop10         |
| 0 | -1.13232 | 0.013 | 0.461 | 0 NeutrophilThra          |
| 0 | -1.13494 | 0.024 | 0.522 | 0 NeutrophilTimm13        |
| 0 | -1.1354  | 0.007 | 0.482 | 0 NeutrophilCapn2         |
| 0 | -1.13959 | 0.007 | 0.385 | 0 NeutrophilScara5        |
| 0 | -1.13965 | 0.033 | 0.521 | 0 NeutrophilTbrg1         |
| 0 | -1.14448 | 0.017 | 0.504 | 0 NeutrophilLrpap1        |
| 0 | -1.14591 | 0.018 | 0.3   | 0 NeutrophilTnfaip6       |
| 0 | -1.14611 | 0.129 | 0.655 | 0 NeutrophilS100a13       |
| 0 | -1.14742 | 0.014 | 0.414 | 0 NeutrophilNop58         |
| 0 | -1.15005 | 0.003 | 0.32  | 0 NeutrophilMafb          |
| 0 | -1.15011 | 0.023 | 0.528 | 0 NeutrophilNdufc1        |
| 0 | -1.15111 | 0.035 | 0.53  | 0 NeutrophilPura          |
| 0 | -1.15463 | 0.066 | 0.614 | 0 NeutrophilNdufb10       |
| 0 | -1.15539 | 0.041 | 0.547 | 0 NeutrophilAtp5g3        |
| 0 | -1.1562  | 0.003 | 0.441 | 0 NeutrophilEng           |
| 0 | -1.15752 | 0.043 | 0.546 | 0 NeutrophilSet           |
| 0 | -1.15772 | 0.01  | 0.52  | 0 NeutrophilGlrx3         |
| 0 | -1.15783 | 0.003 | 0.314 | 0 NeutrophilPgf           |
| 0 | -1.15991 | 0.139 | 0.716 | 0 NeutrophilPasma3        |
| 0 | -1.16124 | 0.015 | 0.428 | 0 NeutrophilTubb2a        |
| 0 | -1.16217 | 0.01  | 0.476 | 0 NeutrophilIl6st         |
| 0 | -1.16267 | 0.086 | 0.612 | 0 NeutrophilVcp           |
| 0 | -1.16346 | 0.148 | 0.686 | 0 NeutrophilCapns1        |
| 0 | -1.16391 | 0.071 | 0.601 | 0 NeutrophilCycs          |
| 0 | -1.16492 | 0.005 | 0.472 | 0 NeutrophilLman1         |
| 0 | -1.16492 | 0.006 | 0.455 | 0 NeutrophilP3h3          |
| 0 | -1.16634 | 0.318 | 0.869 | 0 NeutrophilUqcrh         |
| 0 | -1.1707  | 0.01  | 0.518 | 0 NeutrophilNdufa5        |
| 0 | -1.17203 | 0.074 | 0.604 | 0 NeutrophilP4hb          |
| 0 | -1.17282 | 0.034 | 0.572 | 0 NeutrophilNdufb5        |
| 0 | -1.1749  | 0.006 | 0.471 | 0 NeutrophilFkbp7         |
| 0 | -1.17566 | 0.005 | 0.458 | 0 NeutrophilCnn3          |
| 0 | -1.18228 | 0.026 | 0.413 | 0 NeutrophilPlala         |
| 0 | -1.18262 | 0.008 | 0.344 | 0 NeutrophilSdc4          |
| 0 | -1.18322 | 0.004 | 0.368 | 0 NeutrophilGas6          |
| 0 | -1.18508 | 0.002 | 0.42  | 0 NeutrophilNdrp2         |
| 0 | -1.18544 | 0.031 | 0.561 | 0 NeutrophilCct2          |
| 0 | -1.18553 | 0.005 | 0.443 | 0 NeutrophilMmp23         |
| 0 | -1.18913 | 0.098 | 0.636 | 0 NeutrophilHnrnpa3       |
| 0 | -1.19075 | 0.014 | 0.399 | 0 NeutrophilHsph1         |
| 0 | -1.19179 | 0.008 | 0.479 | 0 NeutrophilTmem256       |
| 0 | -1.19266 | 0.221 | 0.798 | 0 NeutrophilHmgb1         |
| 0 | -1.19509 | 0.076 | 0.603 | 0 NeutrophilOat           |
| 0 | -1.19602 | 0.035 | 0.561 | 0 NeutrophilCct4          |
| 0 | -1.19796 | 0.004 | 0.433 | 0 NeutrophilVwal          |
| 0 | -1.19933 | 0.013 | 0.504 | 0 NeutrophilComt          |

|   |          |       |       |                      |
|---|----------|-------|-------|----------------------|
| 0 | -1.19987 | 0.036 | 0.564 | 0 NeutrophilEif3m    |
| 0 | -1.2005  | 0.024 | 0.54  | 0 NeutrophilAnapc5   |
| 0 | -1.20212 | 0.006 | 0.475 | 0 NeutrophilRcn1     |
| 0 | -1.20342 | 0.049 | 0.601 | 0 NeutrophilCct5     |
| 0 | -1.20452 | 0.026 | 0.554 | 0 NeutrophilSptssa   |
| 0 | -1.20529 | 0.013 | 0.517 | 0 NeutrophilRanbp1   |
| 0 | -1.20539 | 0.005 | 0.436 | 0 NeutrophilDpysl3   |
| 0 | -1.20603 | 0.021 | 0.537 | 0 NeutrophilRexo2    |
| 0 | -1.20732 | 0.007 | 0.472 | 0 NeutrophilFgfr1    |
| 0 | -1.20773 | 0.317 | 0.706 | 0 NeutrophilRho      |
| 0 | -1.20886 | 0.07  | 0.618 | 0 NeutrophilAnp32b   |
| 0 | -1.2096  | 0.004 | 0.346 | 0 NeutrophilFmo2     |
| 0 | -1.21051 | 0.005 | 0.391 | 0 NeutrophilFxyd6    |
| 0 | -1.21192 | 0.043 | 0.563 | 0 NeutrophilDnajc3   |
| 0 | -1.2123  | 0.017 | 0.549 | 0 NeutrophilNdufa11  |
| 0 | -1.21255 | 0.079 | 0.614 | 0 NeutrophilAplp2    |
| 0 | -1.21321 | 0.007 | 0.456 | 0 NeutrophilCavin1   |
| 0 | -1.21633 | 0.201 | 0.726 | 0 NeutrophilCtsb     |
| 0 | -1.21783 | 0.01  | 0.501 | 0 NeutrophilPea15a   |
| 0 | -1.2236  | 0.018 | 0.336 | 0 NeutrophilThy1     |
| 0 | -1.22487 | 0.009 | 0.479 | 0 NeutrophilSlc1a5   |
| 0 | -1.22682 | 0.005 | 0.376 | 0 NeutrophilFibin    |
| 0 | -1.2273  | 0.897 | 0.99  | 0 NeutrophilRps27    |
| 0 | -1.22985 | 0.005 | 0.418 | 0 NeutrophilCol4a2   |
| 0 | -1.23156 | 0.007 | 0.451 | 0 NeutrophilIl1lra1  |
| 0 | -1.23615 | 0.008 | 0.418 | 0 NeutrophilKcnqlot1 |
| 0 | -1.23757 | 0.847 | 0.99  | 0 NeutrophilRps27a   |
| 0 | -1.24245 | 0.008 | 0.37  | 0 NeutrophilAdamts1  |
| 0 | -1.24898 | 0.08  | 0.67  | 0 NeutrophilSec11a   |
| 0 | -1.2497  | 0.31  | 0.719 | 0 NeutrophilPtms     |
| 0 | -1.2526  | 0.009 | 0.508 | 0 NeutrophilTspan3   |
| 0 | -1.25294 | 0.141 | 0.743 | 0 NeutrophilPsmbl    |
| 0 | -1.25416 | 0.082 | 0.639 | 0 NeutrophilNdufv3   |
| 0 | -1.25665 | 0.04  | 0.586 | 0 NeutrophilDpm3     |
| 0 | -1.26284 | 0.024 | 0.546 | 0 NeutrophilSlc50a1  |
| 0 | -1.26674 | 0.062 | 0.636 | 0 NeutrophilPsmbl    |
| 0 | -1.26847 | 0.003 | 0.396 | 0 NeutrophilSfrp1    |
| 0 | -1.26969 | 0.014 | 0.54  | 0 NeutrophilSnrf     |
| 0 | -1.26987 | 0.005 | 0.474 | 0 NeutrophilMfge8    |
| 0 | -1.27132 | 0.041 | 0.601 | 0 NeutrophilEmc10    |
| 0 | -1.27442 | 0.062 | 0.648 | 0 NeutrophilSnul3    |
| 0 | -1.27693 | 0.182 | 0.793 | 0 NeutrophilAtp5d    |
| 0 | -1.27725 | 0.038 | 0.529 | 0 NeutrophilDap      |
| 0 | -1.27726 | 0.022 | 0.571 | 0 NeutrophilMdh1     |
| 0 | -1.27944 | 0.065 | 0.654 | 0 NeutrophilPark7    |
| 0 | -1.28317 | 0.086 | 0.656 | 0 NeutrophilSwi5     |
| 0 | -1.28364 | 0.07  | 0.658 | 0 NeutrophilCox7b    |
| 0 | -1.2876  | 0.095 | 0.639 | 0 NeutrophilMbnl1    |
| 0 | -1.29125 | 0.039 | 0.556 | 0 NeutrophilKdelr2   |
| 0 | -1.29157 | 0.038 | 0.601 | 0 NeutrophilSnrpe    |
| 0 | -1.29349 | 0.023 | 0.563 | 0 NeutrophilSsr2     |
| 0 | -1.29711 | 0.005 | 0.399 | 0 NeutrophilCol5a3   |
| 0 | -1.29804 | 0.008 | 0.498 | 0 NeutrophilDpysl2   |
| 0 | -1.30525 | 0.12  | 0.69  | 0 NeutrophilAkr1a1   |

|   |          |       |       |   |                    |
|---|----------|-------|-------|---|--------------------|
| 0 | -1.30558 | 0.003 | 0.447 | 0 | NeutrophilAebp1    |
| 0 | -1.30812 | 0.102 | 0.717 | 0 | NeutrophilSnrbp    |
| 0 | -1.30942 | 0.019 | 0.545 | 0 | NeutrophilNme1     |
| 0 | -1.31295 | 0.013 | 0.562 | 0 | NeutrophilNdufc2   |
| 0 | -1.31693 | 0.031 | 0.612 | 0 | NeutrophilSnrpd2   |
| 0 | -1.31946 | 0.011 | 0.492 | 0 | NeutrophilRora     |
| 0 | -1.32025 | 0.126 | 0.712 | 0 | NeutrophilYwhae    |
| 0 | -1.32453 | 0.285 | 0.853 | 0 | NeutrophilCox6c    |
| 0 | -1.32536 | 0.041 | 0.563 | 0 | NeutrophilMat2a    |
| 0 | -1.32579 | 0.003 | 0.48  | 0 | NeutrophilFermt2   |
| 0 | -1.32764 | 0.005 | 0.357 | 0 | NeutrophilTppp3    |
| 0 | -1.33044 | 0.23  | 0.764 | 0 | NeutrophilIfngr1   |
| 0 | -1.33168 | 0.005 | 0.461 | 0 | NeutrophilLama4    |
| 0 | -1.33777 | 0.026 | 0.608 | 0 | NeutrophilEif3i    |
| 0 | -1.3398  | 0.007 | 0.467 | 0 | NeutrophilNav1     |
| 0 | -1.34031 | 0.032 | 0.547 | 0 | NeutrophilMif      |
| 0 | -1.34259 | 0.134 | 0.743 | 0 | NeutrophilAtp5a1   |
| 0 | -1.34385 | 0.096 | 0.555 | 0 | NeutrophilRhoc     |
| 0 | -1.34509 | 0.133 | 0.727 | 0 | NeutrophilYwhaq    |
| 0 | -1.34943 | 0.084 | 0.568 | 0 | NeutrophilGm11808  |
| 0 | -1.35131 | 0.008 | 0.437 | 0 | NeutrophilTm4sf1   |
| 0 | -1.35182 | 0.008 | 0.285 | 0 | NeutrophilIrf8     |
| 0 | -1.35463 | 0.069 | 0.65  | 0 | NeutrophilSfr1     |
| 0 | -1.355   | 0.061 | 0.403 | 0 | NeutrophilUgdh     |
| 0 | -1.35511 | 0.026 | 0.539 | 0 | NeutrophilHspd1    |
| 0 | -1.35577 | 0.008 | 0.5   | 0 | NeutrophilFkbp9    |
| 0 | -1.35666 | 0.01  | 0.402 | 0 | NeutrophilBag3     |
| 0 | -1.35979 | 0.004 | 0.476 | 0 | NeutrophilMxra7    |
| 0 | -1.3622  | 0.004 | 0.446 | 0 | NeutrophilAngptl2  |
| 0 | -1.3667  | 0.023 | 0.498 | 0 | NeutrophilNfia     |
| 0 | -1.36886 | 0.051 | 0.628 | 0 | NeutrophilRps27l   |
| 0 | -1.37761 | 0.006 | 0.429 | 0 | NeutrophilHtral    |
| 0 | -1.38198 | 0.133 | 0.768 | 0 | NeutrophilEif3k    |
| 0 | -1.38331 | 0.262 | 0.771 | 0 | NeutrophilEmp3     |
| 0 | -1.38441 | 0.017 | 0.521 | 0 | NeutrophilRas      |
| 0 | -1.38466 | 0.233 | 0.842 | 0 | NeutrophilAtp5h    |
| 0 | -1.38661 | 0.049 | 0.656 | 0 | NeutrophilAtp5o.1  |
| 0 | -1.38806 | 0.331 | 0.602 | 0 | NeutrophilCrispld2 |
| 0 | -1.38869 | 0.241 | 0.747 | 0 | NeutrophilLamp1    |
| 0 | -1.39179 | 0.066 | 0.661 | 0 | Neutrophilmt-Nd5   |
| 0 | -1.399   | 0.009 | 0.501 | 0 | NeutrophilPkd2     |
| 0 | -1.3992  | 0.008 | 0.493 | 0 | NeutrophilCald1    |
| 0 | -1.40327 | 0.055 | 0.376 | 0 | NeutrophilEts1     |
| 0 | -1.4053  | 0.005 | 0.465 | 0 | NeutrophilMedag    |
| 0 | -1.40666 | 0.015 | 0.511 | 0 | NeutrophilPpp1r14b |
| 0 | -1.4089  | 0.007 | 0.531 | 0 | NeutrophilVkorc1   |
| 0 | -1.41523 | 0.006 | 0.401 | 0 | NeutrophilGsta3    |
| 0 | -1.41954 | 0.007 | 0.477 | 0 | NeutrophilEmilin1  |
| 0 | -1.42146 | 0.007 | 0.477 | 0 | NeutrophilSocs2    |
| 0 | -1.42314 | 0.063 | 0.674 | 0 | NeutrophilRan      |
| 0 | -1.42387 | 0.09  | 0.705 | 0 | NeutrophilSsr4     |
| 0 | -1.42592 | 0.023 | 0.585 | 0 | NeutrophilMrpl52   |
| 0 | -1.4321  | 0.043 | 0.533 | 0 | NeutrophilNfic     |
| 0 | -1.43339 | 0.006 | 0.45  | 0 | NeutrophilPpp1r14a |



|            |       |       |                      |
|------------|-------|-------|----------------------|
| 0 -1.43436 | 0.011 | 0.505 | 0 NeutrophilItgb5    |
| 0 -1.43687 | 0.006 | 0.509 | 0 NeutrophilSl00a16  |
| 0 -1.43767 | 0.137 | 0.548 | 0 NeutrophilPhlda1   |
| 0 -1.44548 | 0.008 | 0.447 | 0 NeutrophilSerpine2 |
| 0 -1.44622 | 0.215 | 0.614 | 0 NeutrophilFosb     |
| 0 -1.44634 | 0.007 | 0.501 | 0 NeutrophilPdgfra   |
| 0 -1.45374 | 0.006 | 0.46  | 0 NeutrophilSelenbp1 |
| 0 -1.45713 | 0.007 | 0.474 | 0 NeutrophilSod3     |
| 0 -1.45772 | 0.007 | 0.34  | 0 NeutrophilAckr3    |
| 0 -1.45857 | 0.087 | 0.636 | 0 NeutrophilDbi      |
| 0 -1.45929 | 0.041 | 0.67  | 0 NeutrophilRtraf    |
| 0 -1.46412 | 0.039 | 0.607 | 0 NeutrophilAr11     |
| 0 -1.47205 | 0.01  | 0.541 | 0 NeutrophilCalu     |
| 0 -1.47368 | 0.007 | 0.416 | 0 NeutrophilEln      |
| 0 -1.4756  | 0.057 | 0.659 | 0 NeutrophilNsa2     |
| 0 -1.47718 | 0.008 | 0.488 | 0 NeutrophilCol5a2   |
| 0 -1.47741 | 0.009 | 0.5   | 0 NeutrophilFhl1     |
| 0 -1.48842 | 0.044 | 0.68  | 0 NeutrophilTbca     |
| 0 -1.49461 | 0.005 | 0.474 | 0 NeutrophilAce      |
| 0 -1.49574 | 0.204 | 0.824 | 0 NeutrophilNpc2     |
| 0 -1.5071  | 0.748 | 0.988 | 0 NeutrophilRpl37    |
| 0 -1.50892 | 0.006 | 0.498 | 0 NeutrophilEntpd2   |
| 0 -1.51175 | 0.011 | 0.421 | 0 NeutrophilGfpt2    |
| 0 -1.52421 | 0.012 | 0.604 | 0 NeutrophilPrdx2    |
| 0 -1.53101 | 0.162 | 0.815 | 0 NeutrophilSumo2    |
| 0 -1.53373 | 0.006 | 0.524 | 0 NeutrophilSlc29a1  |
| 0 -1.5385  | 0.092 | 0.747 | 0 NeutrophilNdufa4   |
| 0 -1.54434 | 0.005 | 0.47  | 0 NeutrophilFbn1     |
| 0 -1.5453  | 0.449 | 0.949 | 0 NeutrophilRps25    |
| 0 -1.54757 | 0.006 | 0.494 | 0 NeutrophilAdamts2  |
| 0 -1.54888 | 0.009 | 0.501 | 0 NeutrophilCol5a1   |
| 0 -1.54985 | 0.006 | 0.488 | 0 NeutrophilFbln5    |
| 0 -1.55014 | 0.283 | 0.908 | 0 NeutrophilBtf3     |
| 0 -1.552   | 0.187 | 0.829 | 0 NeutrophilCox7c    |
| 0 -1.55489 | 0.008 | 0.558 | 0 NeutrophilTxndc5   |
| 0 -1.558   | 0.352 | 0.67  | 0 NeutrophilCd63     |
| 0 -1.55839 | 0.167 | 0.854 | 0 NeutrophilCnbp     |
| 0 -1.55935 | 0.024 | 0.467 | 0 NeutrophilUap1     |
| 0 -1.57489 | 0.012 | 0.521 | 0 NeutrophilDdah2    |
| 0 -1.57991 | 0.073 | 0.728 | 0 NeutrophilSerbp1   |
| 0 -1.58789 | 0.398 | 0.814 | 0 NeutrophilH2-K1    |
| 0 -1.59842 | 0.288 | 0.89  | 0 NeutrophilYbx1     |
| 0 -1.60155 | 0.012 | 0.512 | 0 NeutrophilItm2a    |
| 0 -1.60386 | 0.008 | 0.411 | 0 NeutrophilNbl1     |
| 0 -1.60926 | 0.031 | 0.683 | 0 NeutrophilAtp5g1   |
| 0 -1.60954 | 0.01  | 0.565 | 0 NeutrophilFcgrt    |
| 0 -1.61384 | 0.007 | 0.517 | 0 NeutrophilLama2    |
| 0 -1.61805 | 0.067 | 0.722 | 0 NeutrophilTmed9    |
| 0 -1.61823 | 0.006 | 0.543 | 0 NeutrophilFxyd1    |
| 0 -1.62036 | 0.027 | 0.678 | 0 NeutrophilEif3e    |
| 0 -1.62693 | 0.026 | 0.646 | 0 NeutrophilRpn2     |
| 0 -1.64165 | 0.037 | 0.685 | 0 NeutrophilUqcrb    |
| 0 -1.64348 | 0.049 | 0.625 | 0 NeutrophilTmed3    |
| 0 -1.64704 | 0.018 | 0.628 | 0 NeutrophilHmg1     |

|   |          |       |       |                     |
|---|----------|-------|-------|---------------------|
| 0 | -1.65596 | 0.005 | 0.531 | 0 NeutrophilBicc1   |
| 0 | -1.6627  | 0.039 | 0.543 | 0 NeutrophilPnp     |
| 0 | -1.66663 | 0.008 | 0.471 | 0 NeutrophilCol6a3  |
| 0 | -1.67412 | 0.074 | 0.766 | 0 NeutrophilAtp5g2  |
| 0 | -1.67502 | 0.03  | 0.642 | 0 NeutrophilItm2c   |
| 0 | -1.67873 | 0.03  | 0.642 | 0 NeutrophilItgb1   |
| 0 | -1.6834  | 0.008 | 0.524 | 0 NeutrophilPlxdc2  |
| 0 | -1.68392 | 0.033 | 0.631 | 0 NeutrophilSmc6    |
| 0 | -1.6871  | 0.007 | 0.461 | 0 NeutrophilPcolce2 |
| 0 | -1.69014 | 0.009 | 0.523 | 0 NeutrophilNupr1   |
| 0 | -1.69505 | 0.02  | 0.484 | 0 NeutrophilAtf5    |
| 0 | -1.69935 | 0.006 | 0.526 | 0 NeutrophilCavin3  |
| 0 | -1.69953 | 0.023 | 0.339 | 0 NeutrophilCd3e    |
| 0 | -1.70786 | 0.013 | 0.473 | 0 NeutrophilGem     |
| 0 | -1.70917 | 0.01  | 0.505 | 0 NeutrophilPam     |
| 0 | -1.71091 | 0.008 | 0.508 | 0 NeutrophilRamp2   |
| 0 | -1.71297 | 0.009 | 0.524 | 0 NeutrophilPtgis   |
| 0 | -1.71665 | 0.032 | 0.651 | 0 NeutrophilManf    |
| 0 | -1.71901 | 0.007 | 0.51  | 0 NeutrophilOaf     |
| 0 | -1.72793 | 0.019 | 0.677 | 0 NeutrophilPebp1   |
| 0 | -1.74373 | 0.012 | 0.433 | 0 NeutrophilAspn    |
| 0 | -1.75155 | 0.008 | 0.427 | 0 NeutrophilSpon2   |
| 0 | -1.75182 | 0.04  | 0.719 | 0 NeutrophilGlo1    |
| 0 | -1.75524 | 0.049 | 0.759 | 0 NeutrophilDad1    |
| 0 | -1.75539 | 0.212 | 0.865 | 0 NeutrophilDynl11  |
| 0 | -1.75576 | 0.008 | 0.487 | 0 NeutrophilAdamts5 |
| 0 | -1.77488 | 0.013 | 0.341 | 0 NeutrophilCtgf    |
| 0 | -1.79592 | 0.009 | 0.549 | 0 NeutrophilCpq     |
| 0 | -1.80878 | 0.128 | 0.756 | 0 NeutrophilBsg     |
| 0 | -1.81142 | 0.028 | 0.585 | 0 NeutrophilNedd4   |
| 0 | -1.81547 | 0.057 | 0.614 | 0 NeutrophilRnase4  |
| 0 | -1.81862 | 0.05  | 0.672 | 0 NeutrophilZfp3611 |
| 0 | -1.82397 | 0.012 | 0.538 | 0 NeutrophilOlfml3  |
| 0 | -1.82701 | 0.051 | 0.767 | 0 NeutrophilSnrg    |
| 0 | -1.83198 | 0.011 | 0.574 | 0 NeutrophilCamk2n1 |
| 0 | -1.83203 | 0.016 | 0.665 | 0 NeutrophilDdost   |
| 0 | -1.84191 | 0.019 | 0.574 | 0 NeutrophilEmp1    |
| 0 | -1.84388 | 0.007 | 0.53  | 0 NeutrophilTcf21   |
| 0 | -1.85271 | 0.007 | 0.474 | 0 NeutrophilCol8a1  |
| 0 | -1.85744 | 0.008 | 0.562 | 0 NeutrophilRhoj    |
| 0 | -1.86804 | 0.19  | 0.734 | 0 NeutrophilLaptm4a |
| 0 | -1.869   | 0.007 | 0.464 | 0 NeutrophilTimp3   |
| 0 | -1.86977 | 0.038 | 0.656 | 0 NeutrophilPdia6   |
| 0 | -1.87068 | 0.19  | 0.613 | 0 NeutrophilDnajb1  |
| 0 | -1.8707  | 0.012 | 0.542 | 0 NeutrophilEbf1    |
| 0 | -1.87111 | 0.149 | 0.715 | 0 NeutrophilUba52   |
| 0 | -1.87443 | 0.254 | 0.895 | 0 NeutrophilEef1b2  |
| 0 | -1.88284 | 0.125 | 0.821 | 0 NeutrophilSec61g  |
| 0 | -1.88422 | 0.067 | 0.806 | 0 NeutrophilHint1   |
| 0 | -1.88473 | 0.088 | 0.433 | 0 NeutrophilGm12840 |
| 0 | -1.89397 | 0.019 | 0.622 | 0 NeutrophilLmna    |
| 0 | -1.90048 | 0.016 | 0.375 | 0 NeutrophilMt2     |
| 0 | -1.91037 | 0.1   | 0.835 | 0 NeutrophilEif3h   |
| 0 | -1.92347 | 0.008 | 0.516 | 0 NeutrophilSlr     |

|   |          |       |       |                      |
|---|----------|-------|-------|----------------------|
| 0 | -1.9238  | 0.009 | 0.53  | 0 NeutrophilSpry1    |
| 0 | -1.92858 | 0.027 | 0.556 | 0 NeutrophilErrfi1   |
| 0 | -1.93529 | 0.013 | 0.599 | 0 NeutrophilCd302    |
| 0 | -1.93886 | 0.014 | 0.292 | 0 NeutrophilMfap4    |
| 0 | -1.94036 | 0.073 | 0.818 | 0 NeutrophilEef1d    |
| 0 | -1.94176 | 0.008 | 0.571 | 0 NeutrophilNfib     |
| 0 | -1.95411 | 0.008 | 0.554 | 0 NeutrophilGpm6b    |
| 0 | -1.95489 | 0.061 | 0.787 | 0 NeutrophilEef1g    |
| 0 | -1.95739 | 0.603 | 0.984 | 0 NeutrophilRpl17    |
| 0 | -1.96068 | 0.017 | 0.567 | 0 NeutrophilAbca8a   |
| 0 | -1.97695 | 0.101 | 0.784 | 0 NeutrophilSelenof  |
| 0 | -1.9799  | 0.011 | 0.587 | 0 NeutrophilRcn3     |
| 0 | -1.99141 | 0.009 | 0.574 | 0 NeutrophilMxra8    |
| 0 | -1.99613 | 0.012 | 0.512 | 0 NeutrophilOgn      |
| 0 | -2.00715 | 0.026 | 0.741 | 0 NeutrophilKrtcap2  |
| 0 | -2.00832 | 0.013 | 0.581 | 0 NeutrophilSdc2     |
| 0 | -2.00904 | 0.01  | 0.536 | 0 NeutrophilLamb1    |
| 0 | -2.01582 | 0.771 | 0.996 | 0 NeutrophilRpl41    |
| 0 | -2.02035 | 0.025 | 0.666 | 0 NeutrophilYbx3     |
| 0 | -2.02165 | 0.186 | 0.902 | 0 NeutrophilEif3f    |
| 0 | -2.03015 | 0.026 | 0.737 | 0 NeutrophilFkbp1a   |
| 0 | -2.03316 | 0.044 | 0.748 | 0 NeutrophilTubb5    |
| 0 | -2.03468 | 0.038 | 0.748 | 0 NeutrophilHspe1    |
| 0 | -2.03577 | 0.014 | 0.562 | 0 NeutrophilTnxb     |
| 0 | -2.03581 | 0.012 | 0.623 | 0 NeutrophilNenf     |
| 0 | -2.04575 | 0.744 | 0.992 | 0 NeutrophilRps29    |
| 0 | -2.04579 | 0.018 | 0.575 | 0 NeutrophilSlc43a3  |
| 0 | -2.04783 | 0.029 | 0.603 | 0 NeutrophilSerp1b6a |
| 0 | -2.0734  | 0.073 | 0.708 | 0 NeutrophilRpl13a   |
| 0 | -2.07643 | 0.009 | 0.555 | 0 NeutrophilPlpp3    |
| 0 | -2.07673 | 0.013 | 0.566 | 0 NeutrophilPrep     |
| 0 | -2.08374 | 0.68  | 0.991 | 0 NeutrophilRpl18a   |
| 0 | -2.0928  | 0.032 | 0.723 | 0 NeutrophilTuba1b   |
| 0 | -2.09833 | 0.267 | 0.941 | 0 NeutrophilRpl27    |
| 0 | -2.10104 | 0.877 | 0.997 | 0 NeutrophilTpt1     |
| 0 | -2.10423 | 0.771 | 0.994 | 0 NeutrophilRps16    |
| 0 | -2.11227 | 0.014 | 0.608 | 0 NeutrophilTcf4     |
| 0 | -2.11298 | 0.158 | 0.621 | 0 NeutrophilSocs3    |
| 0 | -2.11486 | 0.011 | 0.571 | 0 NeutrophilLox11    |
| 0 | -2.11973 | 0.09  | 0.665 | 0 NeutrophilMtch1    |
| 0 | -2.13639 | 0.091 | 0.764 | 0 NeutrophilPd1a3    |
| 0 | -2.13676 | 0.093 | 0.839 | 0 NeutrophilTagln2   |
| 0 | -2.14021 | 0.37  | 0.921 | 0 NeutrophilGnas     |
| 0 | -2.14697 | 0.011 | 0.549 | 0 NeutrophilPcsk6    |
| 0 | -2.15355 | 0.02  | 0.562 | 0 NeutrophilEc1      |
| 0 | -2.15495 | 0.012 | 0.595 | 0 NeutrophilLamc1    |
| 0 | -2.15513 | 0.018 | 0.616 | 0 NeutrophilKlf9     |
| 0 | -2.16273 | 0.121 | 0.875 | 0 NeutrophilRpl31    |
| 0 | -2.16333 | 0.048 | 0.821 | 0 NeutrophilRpl36a1  |
| 0 | -2.17201 | 0.061 | 0.829 | 0 Neutrophilmt-Nd3   |
| 0 | -2.1828  | 0.066 | 0.707 | 0 NeutrophilCyb5a    |
| 0 | -2.18586 | 0.601 | 0.961 | 0 NeutrophilHspa8    |
| 0 | -2.18766 | 0.616 | 0.98  | 0 NeutrophilRps10    |
| 0 | -2.18886 | 0.696 | 0.989 | 0 NeutrophilRpl9     |

|            |       |       |                      |
|------------|-------|-------|----------------------|
| 0 -2.19102 | 0.105 | 0.71  | 0 NeutrophilSelenop  |
| 0 -2.19193 | 0.01  | 0.589 | 0 NeutrophilCrip2    |
| 0 -2.20863 | 0.028 | 0.721 | 0 NeutrophilAhnak    |
| 0 -2.21587 | 0.066 | 0.844 | 0 NeutrophilNpml     |
| 0 -2.22071 | 0.016 | 0.528 | 0 NeutrophilCkb      |
| 0 -2.2228  | 0.013 | 0.587 | 0 NeutrophilRbp1     |
| 0 -2.23328 | 0.023 | 0.727 | 0 NeutrophilSlc25a4  |
| 0 -2.23578 | 0.012 | 0.576 | 0 NeutrophilHspg2    |
| 0 -2.23832 | 0.011 | 0.562 | 0 NeutrophilCol4a1   |
| 0 -2.23912 | 0.01  | 0.586 | 0 NeutrophilNfix     |
| 0 -2.24153 | 0.014 | 0.594 | 0 NeutrophilAxl      |
| 0 -2.2513  | 0.664 | 0.984 | 0 NeutrophilRps12    |
| 0 -2.25577 | 0.038 | 0.667 | 0 NeutrophilSptbn1   |
| 0 -2.26085 | 0.488 | 0.981 | 0 NeutrophilRps13    |
| 0 -2.27045 | 0.405 | 0.979 | 0 NeutrophilRplp2    |
| 0 -2.29042 | 0.013 | 0.601 | 0 NeutrophilPmp22    |
| 0 -2.29067 | 0.014 | 0.631 | 0 NeutrophilSelenom  |
| 0 -2.29148 | 0.011 | 0.62  | 0 NeutrophilLrpl     |
| 0 -2.30703 | 0.014 | 0.549 | 0 NeutrophilGas1     |
| 0 -2.31347 | 0.452 | 0.985 | 0 NeutrophilRps14    |
| 0 -2.31683 | 0.437 | 0.978 | 0 NeutrophilRpl10    |
| 0 -2.33308 | 0.12  | 0.854 | 0 NeutrophilPpib     |
| 0 -2.34701 | 0.013 | 0.399 | 0 NeutrophilCyr61    |
| 0 -2.34966 | 0.015 | 0.621 | 0 NeutrophilLhfp     |
| 0 -2.36256 | 0.16  | 0.934 | 0 NeutrophilNaca     |
| 0 -2.36798 | 0.545 | 0.685 | 0 NeutrophilCebpd    |
| 0 -2.36944 | 0.528 | 0.971 | 0 NeutrophilRpl30    |
| 0 -2.38012 | 0.602 | 0.989 | 0 NeutrophilRpl23    |
| 0 -2.38284 | 0.149 | 0.734 | 0 NeutrophilAnxa5    |
| 0 -2.38611 | 0.162 | 0.693 | 0 NeutrophilCtsl     |
| 0 -2.38696 | 0.016 | 0.584 | 0 NeutrophilNid1     |
| 0 -2.39337 | 0.044 | 0.818 | 0 NeutrophilPrdx1    |
| 0 -2.39986 | 0.081 | 0.866 | 0 NeutrophilRps17    |
| 0 -2.40185 | 0.519 | 0.986 | 0 NeutrophilRpl34    |
| 0 -2.40632 | 0.031 | 0.571 | 0 NeutrophilAW112010 |
| 0 -2.41371 | 0.525 | 0.991 | 0 NeutrophilRpl35a   |
| 0 -2.4264  | 0.216 | 0.935 | 0 NeutrophilRpl23a   |
| 0 -2.43086 | 0.017 | 0.603 | 0 NeutrophilDpt      |
| 0 -2.43182 | 0.474 | 0.984 | 0 NeutrophilRps3     |
| 0 -2.43785 | 0.41  | 0.97  | 0 NeutrophilEef2     |
| 0 -2.44315 | 0.02  | 0.639 | 0 NeutrophilPmpa1    |
| 0 -2.46695 | 0.331 | 0.975 | 0 NeutrophilRpl24    |
| 0 -2.47717 | 0.023 | 0.592 | 0 NeutrophilFstl1    |
| 0 -2.47842 | 0.245 | 0.964 | 0 NeutrophilRps26    |
| 0 -2.48245 | 0.143 | 0.826 | 0 NeutrophilCalr     |
| 0 -2.48795 | 0.491 | 0.986 | 0 NeutrophilRpl37a   |
| 0 -2.50617 | 0.067 | 0.787 | 0 NeutrophilHsp90b1  |
| 0 -2.514   | 0.042 | 0.871 | 0 NeutrophilSelenow  |
| 0 -2.52182 | 0.012 | 0.494 | 0 NeutrophilDpep1    |
| 0 -2.52373 | 0.016 | 0.488 | 0 NeutrophilMeg3     |
| 0 -2.52802 | 0.535 | 0.989 | 0 NeutrophilRpl27a   |
| 0 -2.52935 | 0.528 | 0.995 | 0 Neutrophilmt-Col   |
| 0 -2.5358  | 0.155 | 0.775 | 0 NeutrophilTubala   |
| 0 -2.53835 | 0.186 | 0.95  | 0 NeutrophilRpl26    |

|   |          |       |       |                      |
|---|----------|-------|-------|----------------------|
| 0 | -2.56445 | 0.206 | 0.949 | 0 NeutrophilRps6     |
| 0 | -2.5866  | 0.044 | 0.42  | 0 NeutrophilCxcl1    |
| 0 | -2.59004 | 0.025 | 0.647 | 0 NeutrophilGstm1    |
| 0 | -2.60756 | 0.446 | 0.983 | 0 NeutrophilRpl21    |
| 0 | -2.6116  | 0.221 | 0.957 | 0 NeutrophilRpl7a    |
| 0 | -2.61185 | 0.372 | 0.982 | 0 NeutrophilRps23    |
| 0 | -2.62317 | 0.425 | 0.986 | 0 NeutrophilRpl8     |
| 0 | -2.63183 | 0.023 | 0.577 | 0 NeutrophilCol15a1  |
| 0 | -2.63736 | 0.024 | 0.596 | 0 NeutrophilId3      |
| 0 | -2.63826 | 0.366 | 0.982 | 0 NeutrophilRpl18    |
| 0 | -2.64144 | 0.289 | 0.941 | 0 NeutrophilHsp90ab1 |
| 0 | -2.64825 | 0.426 | 0.978 | 0 NeutrophilRpl28    |
| 0 | -2.65576 | 0.02  | 0.591 | 0 NeutrophilFbln2    |
| 0 | -2.67012 | 0.207 | 0.965 | 0 NeutrophilRps15    |
| 0 | -2.67271 | 0.023 | 0.613 | 0 NeutrophilMmp2     |
| 0 | -2.6741  | 0.049 | 0.89  | 0 NeutrophilRpl2211  |
| 0 | -2.6764  | 0.03  | 0.678 | 0 NeutrophilZbtb20   |
| 0 | -2.67662 | 0.451 | 0.983 | 0 NeutrophilRps21    |
| 0 | -2.68225 | 0.115 | 0.935 | 0 NeutrophilRpl5     |
| 0 | -2.68946 | 0.016 | 0.593 | 0 NeutrophilCol6a2   |
| 0 | -2.69249 | 0.016 | 0.602 | 0 NeutrophilSerpinf1 |
| 0 | -2.69295 | 0.026 | 0.608 | 0 NeutrophilCfh      |
| 0 | -2.70034 | 0.346 | 0.982 | 0 NeutrophilRpl7     |
| 0 | -2.70348 | 0.309 | 0.974 | 0 Neutrophilmt-Nd4   |
| 0 | -2.70468 | 0.201 | 0.857 | 0 NeutrophilHsp90aa1 |
| 0 | -2.71655 | 0.019 | 0.591 | 0 NeutrophilCcdc80   |
| 0 | -2.73287 | 0.017 | 0.639 | 0 NeutrophilRarres2  |
| 0 | -2.73369 | 0.338 | 0.984 | 0 NeutrophilRpl11    |
| 0 | -2.73768 | 0.027 | 0.534 | 0 NeutrophilMfap5    |
| 0 | -2.74328 | 0.406 | 0.981 | 0 NeutrophilRps11    |
| 0 | -2.76056 | 0.319 | 0.985 | 0 NeutrophilRpl38    |
| 0 | -2.76541 | 0.39  | 0.986 | 0 NeutrophilRpl39    |
| 0 | -2.77073 | 0.021 | 0.618 | 0 NeutrophilCd34     |
| 0 | -2.77411 | 0.023 | 0.604 | 0 NeutrophilCol6a1   |
| 0 | -2.78826 | 0.127 | 0.944 | 0 NeutrophilRpl4     |
| 0 | -2.81168 | 0.565 | 0.994 | 0 NeutrophilRps8     |
| 0 | -2.83313 | 0.023 | 0.584 | 0 NeutrophilSmoc2    |
| 0 | -2.84262 | 0.05  | 0.844 | 0 NeutrophilS100a10  |
| 0 | -2.8537  | 0.467 | 0.994 | 0 Neutrophilmt-Co2   |
| 0 | -2.86439 | 0.144 | 0.978 | 0 Neutrophilmt-Nd1   |
| 0 | -2.86743 | 0.372 | 0.982 | 0 NeutrophilRps7     |
| 0 | -2.86949 | 0.343 | 0.88  | 0 NeutrophilVim      |
| 0 | -2.89718 | 0.026 | 0.572 | 0 NeutrophilLy6a     |
| 0 | -2.89827 | 0.368 | 0.986 | 0 NeutrophilRps3a1   |
| 0 | -2.90495 | 0.13  | 0.664 | 0 NeutrophilEgr1     |
| 0 | -2.94263 | 0.601 | 0.997 | 0 Neutrophilmt-Co3   |
| 0 | -2.9459  | 0.205 | 0.976 | 0 NeutrophilRpl36    |
| 0 | -2.96359 | 0.119 | 0.951 | 0 NeutrophilRack1    |
| 0 | -2.97003 | 0.111 | 0.956 | 0 NeutrophilRpl22    |
| 0 | -2.98334 | 0.057 | 0.687 | 0 NeutrophilCd81     |
| 0 | -2.99636 | 0.209 | 0.973 | 0 NeutrophilRpl15    |
| 0 | -2.99732 | 0.268 | 0.981 | 0 NeutrophilRpl6     |
| 0 | -3.00221 | 0.157 | 0.973 | 0 NeutrophilPpia     |
| 0 | -3.01167 | 0.142 | 0.947 | 0 Neutrophilmt-Nd2   |

|            |       |       |                      |
|------------|-------|-------|----------------------|
| 0 -3.02092 | 0.021 | 0.638 | 0 NeutrophilCygb     |
| 0 -3.02657 | 0.342 | 0.987 | 0 NeutrophilRpl19    |
| 0 -3.02777 | 0.108 | 0.96  | 0 NeutrophilRpl36a   |
| 0 -3.05345 | 0.479 | 0.992 | 0 NeutrophilRplp1    |
| 0 -3.05783 | 0.554 | 0.998 | 0 Neutrophilmt-Atp6  |
| 0 -3.06579 | 0.327 | 0.989 | 0 Neutrophilmt-Cytb  |
| 0 -3.07607 | 0.206 | 0.977 | 0 NeutrophilPtma     |
| 0 -3.07616 | 0.139 | 0.974 | 0 NeutrophilRpl14    |
| 0 -3.08578 | 0.026 | 0.616 | 0 NeutrophilKlf4     |
| 0 -3.10356 | 0.291 | 0.983 | 0 NeutrophilRps2     |
| 0 -3.10443 | 0.034 | 0.683 | 0 NeutrophilIgfbp4   |
| 0 -3.13508 | 0.105 | 0.944 | 0 NeutrophilRpl35    |
| 0 -3.14317 | 0.194 | 0.97  | 0 NeutrophilRps28    |
| 0 -3.14524 | 0.065 | 0.846 | 0 NeutrophilCrip1    |
| 0 -3.17698 | 0.071 | 0.511 | 0 NeutrophilApoE     |
| 0 -3.20261 | 0.041 | 0.647 | 0 NeutrophilLtbp4    |
| 0 -3.20398 | 0.347 | 0.99  | 0 NeutrophilRplp0    |
| 0 -3.20411 | 0.028 | 0.636 | 0 NeutrophilPcolce   |
| 0 -3.22704 | 0.439 | 0.992 | 0 NeutrophilRps24    |
| 0 -3.25903 | 0.111 | 0.959 | 0 NeutrophilRps18    |
| 0 -3.26156 | 0.233 | 0.985 | 0 NeutrophilRps15a   |
| 0 -3.26466 | 0.099 | 0.958 | 0 NeutrophilRpl12    |
| 0 -3.26741 | 0.616 | 0.995 | 0 NeutrophilEef1a1   |
| 0 -3.28552 | 0.041 | 0.616 | 0 NeutrophilColla1   |
| 0 -3.29231 | 0.029 | 0.612 | 0 NeutrophilFbln1    |
| 0 -3.32485 | 0.035 | 0.521 | 0 NeutrophilHspb1    |
| 0 -3.33152 | 0.076 | 0.968 | 0 NeutrophilRpl10a   |
| 0 -3.3583  | 0.031 | 0.637 | 0 NeutrophilGpx3     |
| 0 -3.37327 | 0.117 | 0.954 | 0 NeutrophilTmsb10   |
| 0 -3.40207 | 0.229 | 0.988 | 0 NeutrophilRps5     |
| 0 -3.40223 | 0.054 | 0.852 | 0 NeutrophilLgals1   |
| 0 -3.4171  | 0.023 | 0.621 | 0 NeutrophilSerpinh1 |
| 0 -3.42821 | 0.097 | 0.973 | 0 NeutrophilRpl3     |
| 0 -3.44439 | 0.411 | 0.996 | 0 NeutrophilRpl13    |
| 0 -3.48478 | 0.208 | 0.986 | 0 NeutrophilRps19    |
| 0 -3.50514 | 0.185 | 0.987 | 0 NeutrophilRpl32    |
| 0 -3.51286 | 0.035 | 0.635 | 0 NeutrophilColla2   |
| 0 -3.58775 | 0.144 | 0.98  | 0 NeutrophilRps20    |
| 0 -3.63859 | 0.052 | 0.653 | 0 NeutrophilLum      |
| 0 -3.64595 | 0.257 | 0.991 | 0 NeutrophilRps4x    |
| 0 -3.68607 | 0.063 | 0.626 | 0 NeutrophilCol3a1   |
| 0 -3.69418 | 0.025 | 0.652 | 0 NeutrophilSerp1ng1 |
| 0 -3.70692 | 0.159 | 0.984 | 0 NeutrophilRpsa     |
| 0 -3.76022 | 0.04  | 0.604 | 0 NeutrophilLpl      |
| 0 -3.84133 | 0.063 | 0.664 | 0 NeutrophilSparcl1  |
| 0 -3.87911 | 0.037 | 0.648 | 0 NeutrophilClec3b   |
| 0 -3.88654 | 0.109 | 0.677 | 0 NeutrophilHspalA   |
| 0 -4.0249  | 0.123 | 0.656 | 0 NeutrophilMt1      |
| 0 -4.02861 | 0.059 | 0.667 | 0 NeutrophilHtra3    |
| 0 -4.04477 | 0.099 | 0.727 | 0 NeutrophilHspalb   |
| 0 -4.05738 | 0.13  | 0.783 | 0 NeutrophilJun      |
| 0 -4.19862 | 0.052 | 0.661 | 0 NeutrophilSparc    |
| 0 -4.31318 | 0.066 | 0.676 | 0 NeutrophilBgn      |
| 0 -4.46677 | 0.101 | 0.704 | 0 NeutrophilIgfbp7   |

|       |          |       |       |       |                         |
|-------|----------|-------|-------|-------|-------------------------|
| 0     | -4.71633 | 0.116 | 0.696 | 0     | NeutrophilMgp           |
| 0     | -4.94699 | 0.609 | 0.816 | 0     | NeutrophilGsn           |
| 0     | -5.75959 | 0.253 | 0.752 | 0     | NeutrophilDcn           |
| ##### | 1.056544 | 0.268 | 0.082 | ##### | NeutrophilKlhl2         |
| ##### | 1.280501 | 0.454 | 0.26  | ##### | NeutrophilAnxal1        |
| ##### | 1.122724 | 0.341 | 0.136 | ##### | NeutrophilXpo6          |
| ##### | 1.149699 | 0.594 | 0.447 | ##### | NeutrophilVamp8         |
| ##### | 1.142959 | 0.34  | 0.133 | ##### | NeutrophilPag1          |
| ##### | 1.372169 | 0.425 | 0.219 | ##### | NeutrophilHmgn2         |
| ##### | -1.72459 | 0.019 | 0.271 | ##### | NeutrophilSl00a4        |
| ##### | -1.06301 | 0.626 | 0.733 | ##### | NeutrophilIfitm3        |
| ##### | 1.10924  | 0.379 | 0.169 | ##### | NeutrophilLbr           |
| ##### | 1.059651 | 0.274 | 0.088 | ##### | NeutrophiTtc7           |
| ##### | 1.44284  | 0.594 | 0.451 | ##### | NeutrophilAdgre5        |
| ##### | 1.107328 | 0.508 | 0.316 | ##### | NeutrophilApbb1ip       |
| ##### | 1.521339 | 0.609 | 0.524 | ##### | NeutrophilMgst1         |
| ##### | 1.149497 | 0.318 | 0.124 | ##### | NeutrophilSmim3         |
| ##### | 1.000521 | 0.33  | 0.13  | ##### | NeutrophilArrb2         |
| ##### | 1.297298 | 0.487 | 0.314 | ##### | NeutrophilSbnol         |
| ##### | 1.286521 | 0.562 | 0.433 | ##### | NeutrophilHectd1        |
| ##### | 1.209689 | 0.333 | 0.143 | ##### | NeutrophilSp140         |
| ##### | 1.265914 | 0.549 | 0.424 | ##### | NeutrophilCreg1         |
| ##### | 1.09557  | 0.275 | 0.096 | ##### | NeutrophilAbr           |
| ##### | 1.146025 | 0.279 | 0.1   | ##### | NeutrophilEll2          |
| ##### | -1.26355 | 0.841 | 0.845 | ##### | NeutrophilCst3          |
| ##### | 1.063999 | 0.612 | 0.506 | ##### | NeutrophilSupt4a        |
| ##### | 1.222136 | 0.452 | 0.282 | ##### | NeutrophilRaf1          |
| ##### | 1.351848 | 0.289 | 0.098 | ##### | NeutrophilCcl4          |
| ##### | 1.023119 | 0.712 | 0.729 | ##### | NeutrophilD8ErtD738e    |
| ##### | -1.02007 | 0.134 | 0.404 | ##### | NeutrophilGadd45g       |
| ##### | 1.074637 | 0.294 | 0.122 | ##### | NeutrophilMtus1         |
| ##### | 1.409103 | 0.317 | 0.142 | ##### | NeutrophilHist1h2bc     |
| ##### | 1.36379  | 0.602 | 0.547 | ##### | NeutrophilCtnnb1        |
| ##### | 1.196653 | 0.44  | 0.277 | ##### | NeutrophilHipk1         |
| ##### | 1.378592 | 0.636 | 0.584 | ##### | NeutrophilAnxal         |
| ##### | 1.269563 | 0.468 | 0.314 | ##### | NeutrophilPer1          |
| ##### | 1.297837 | 0.387 | 0.212 | ##### | NeutrophilPnpla2        |
| ##### | 1.213109 | 0.309 | 0.138 | ##### | NeutrophilBraf          |
| ##### | 1.158575 | 0.39  | 0.221 | ##### | NeutrophilPxn           |
| ##### | 1.177956 | 0.521 | 0.389 | ##### | NeutrophilPtpn1         |
| ##### | 1.30648  | 0.489 | 0.364 | ##### | NeutrophilSelenon       |
| ##### | 1.258481 | 0.45  | 0.306 | ##### | NeutrophilTcn2          |
| ##### | 1.225433 | 0.466 | 0.302 | ##### | NeutrophilGm26532       |
| ##### | 1.174405 | 0.452 | 0.307 | ##### | NeutrophilMax           |
| ##### | 1.056218 | 0.525 | 0.398 | ##### | NeutrophilPtbp3         |
| ##### | 1.113103 | 0.558 | 0.502 | ##### | Neutrophil1110008F13Rik |
| ##### | 1.092579 | 0.463 | 0.317 | ##### | NeutrophilCdc42sel      |
| ##### | 1.245456 | 0.56  | 0.453 | ##### | NeutrophilKdm6b         |
| ##### | 1.080555 | 0.491 | 0.373 | ##### | NeutrophilRnf130        |
| ##### | 1.034272 | 0.291 | 0.131 | ##### | NeutrophilNotch1        |
| ##### | 1.389754 | 0.367 | 0.2   | ##### | NeutrophilHist1h1c      |
| ##### | 1.135191 | 0.347 | 0.191 | ##### | NeutrophilHgsnat        |
| ##### | 1.234819 | 0.373 | 0.218 | ##### | NeutrophilIgflr         |
| ##### | 1.102444 | 0.296 | 0.139 | ##### | NeutrophilDusp6         |

|          |          |       |       |          |                    |
|----------|----------|-------|-------|----------|--------------------|
| #####    | 1.166962 | 0.48  | 0.371 | #####    | NeutrophilNadk     |
| #####    | 1.034784 | 0.403 | 0.254 | #####    | NeutrophilHpcal1   |
| #####    | 1.229426 | 0.432 | 0.297 | #####    | NeutrophilDdit3    |
| #####    | 1.067056 | 0.376 | 0.223 | #####    | NeutrophilKdm7a    |
| #####    | -1.2957  | 0.732 | 0.788 | #####    | NeutrophilFos      |
| #####    | 1.132951 | 0.533 | 0.5   | #####    | NeutrophilTkt      |
| #####    | -1.54778 | 0.506 | 0.604 | #####    | NeutrophilPil6     |
| #####    | 1.050179 | 0.48  | 0.383 | #####    | NeutrophilSsu72    |
| #####    | 1.218285 | 0.533 | 0.461 | #####    | NeutrophilCox17    |
| #####    | 1.192418 | 0.276 | 0.129 | #####    | NeutrophilTrf      |
| #####    | 1.053783 | 0.447 | 0.344 | #####    | NeutrophilMap2k3   |
| #####    | 1.06094  | 0.533 | 0.473 | #####    | NeutrophilCoq10b   |
| #####    | 1.081147 | 0.261 | 0.127 | #####    | NeutrophilSt3gal6  |
| #####    | 1.007637 | 0.312 | 0.174 | #####    | NeutrophilMboat7   |
| #####    | 1.073853 | 0.36  | 0.227 | #####    | NeutrophilNotch2   |
| #####    | 1.117517 | 0.261 | 0.121 | #####    | NeutrophilPtgs2    |
| #####    | 1.531148 | 0.513 | 0.439 | #####    | NeutrophilNfkbiz   |
| #####    | 1.088348 | 0.341 | 0.212 | #####    | NeutrophilTmem189  |
| #####    | 1.230583 | 0.454 | 0.375 | #####    | NeutrophilMapkapk2 |
| #####    | 1.074538 | 0.361 | 0.245 | #####    | NeutrophilPreb     |
| #####    | -1.14485 | 0.225 | 0.408 | #####    | NeutrophilC3       |
| #####    | 1.028414 | 0.428 | 0.358 | #####    | NeutrophilEtf1     |
| 2.05E-82 | 1.073467 | 0.42  | 0.375 | 3.69E-78 | NeutrophilEmd      |
| 4.07E-82 | 1.075118 | 0.4   | 0.327 | 7.33E-78 | NeutrophilGadd45a  |
| 4.80E-76 | 1.65551  | 0.436 | 0.378 | 8.64E-72 | NeutrophilThbs1    |
| 8.86E-75 | -2.08193 | 0.647 | 0.675 | 1.60E-70 | NeutrophilHbb-bs   |
| 2.50E-72 | 1.088426 | 0.382 | 0.329 | 4.50E-68 | NeutrophilPlin2    |
| 4.83E-36 | 1.493389 | 0.606 | 0.716 | 8.70E-32 | NeutrophilNfkbia   |
| 2.73E-30 | 1.049703 | 0.444 | 0.487 | 4.91E-26 | NeutrophilAtp2b1   |
| 2.45E-22 | -2.0963  | 0.479 | 0.506 | 4.41E-18 | NeutrophilHba-al   |
| 0        | 3.169906 | 0.899 | 0.064 | 0        | T cells Trbc2      |
| 0        | 2.804744 | 0.89  | 0.061 | 0        | T cells Cd3g       |
| 0        | 2.608806 | 0.788 | 0.041 | 0        | T cells Trac       |
| 0        | 2.50985  | 0.724 | 0.053 | 0        | T cells Cd28       |
| 0        | 2.488974 | 0.795 | 0.087 | 0        | T cells Ms4a4b     |
| 0        | 2.374579 | 0.524 | 0.065 | 0        | T cells Trbc1      |
| 0        | 2.335249 | 0.906 | 0.141 | 0        | T cells Cd3d       |
| 0        | 2.329106 | 0.704 | 0.095 | 0        | T cells Gimap6     |
| 0        | 2.2516   | 0.487 | 0.047 | 0        | T cells Ccr7       |
| 0        | 2.244881 | 0.456 | 0.033 | 0        | T cells Icos       |
| 0        | 2.220824 | 0.763 | 0.092 | 0        | T cells Ms4a6b     |
| 0        | 2.208727 | 0.517 | 0.078 | 0        | T cells Dusp10     |
| 0        | 2.174123 | 0.867 | 0.234 | 0        | T cells Ets1       |
| 0        | 2.161649 | 0.725 | 0.084 | 0        | T cells Cd2        |
| 0        | 2.133503 | 0.725 | 0.052 | 0        | T cells Lat        |
| 0        | 2.076032 | 0.978 | 0.69  | 0        | T cells H2-K1      |
| 0        | 2.074876 | 0.785 | 0.296 | 0        | T cells Vps37b     |
| 0        | 2.051239 | 0.328 | 0.02  | 0        | T cells Ctla4      |
| 0        | 2.046058 | 0.882 | 0.192 | 0        | T cells Cd3e       |
| 0        | 1.985146 | 0.301 | 0.006 | 0        | T cells Tnfrsf4    |
| 0        | 1.965119 | 0.512 | 0.029 | 0        | T cells Il17r      |
| 0        | 1.956397 | 0.987 | 0.741 | 0        | T cells Rpl12      |
| 0        | 1.952248 | 0.651 | 0.062 | 0        | T cells Gimap3     |
| 0        | 1.935432 | 0.673 | 0.075 | 0        | T cells Gimap1     |



|   |          |       |       |           |               |
|---|----------|-------|-------|-----------|---------------|
| 0 | 1.915571 | 0.702 | 0.076 | 0 T cells | Lck           |
| 0 | 1.890965 | 0.484 | 0.02  | 0 T cells | Lef1          |
| 0 | 1.829037 | 0.995 | 0.854 | 0 T cells | Rps24         |
| 0 | 1.817647 | 0.993 | 0.741 | 0 T cells | Tmsb10        |
| 0 | 1.768642 | 0.555 | 0.044 | 0 T cells | Itk           |
| 0 | 1.767053 | 0.634 | 0.207 | 0 T cells | Cr1f3         |
| 0 | 1.759156 | 0.532 | 0.151 | 0 T cells | Satb1         |
| 0 | 1.752392 | 0.832 | 0.205 | 0 T cells | Ptpn18        |
| 0 | 1.748583 | 0.442 | 0.041 | 0 T cells | Tnfrsf18      |
| 0 | 1.725825 | 0.632 | 0.058 | 0 T cells | Skap1         |
| 0 | 1.720368 | 0.552 | 0.137 | 0 T cells | Gramd3        |
| 0 | 1.716374 | 0.526 | 0.053 | 0 T cells | Cd27          |
| 0 | 1.710753 | 0.993 | 0.829 | 0 T cells | Rps7          |
| 0 | 1.709786 | 0.568 | 0.06  | 0 T cells | Gimap4        |
| 0 | 1.701426 | 0.994 | 0.797 | 0 T cells | Rps15a        |
| 0 | 1.621092 | 0.429 | 0.096 | 0 T cells | Rgs1          |
| 0 | 1.617557 | 0.993 | 0.778 | 0 T cells | Rpsa          |
| 0 | 1.610745 | 0.993 | 0.792 | 0 T cells | Rps19         |
| 0 | 1.603731 | 0.99  | 0.771 | 0 T cells | Rps20         |
| 0 | 1.600024 | 0.996 | 0.83  | 0 T cells | Rplp0         |
| 0 | 1.597403 | 0.996 | 0.966 | 0 T cells | Rps27         |
| 0 | 1.590738 | 0.998 | 0.938 | 0 T cells | Rps16         |
| 0 | 1.573917 | 0.994 | 0.857 | 0 T cells | Rps13         |
| 0 | 1.570713 | 0.978 | 0.747 | 0 T cells | Rps18         |
| 0 | 1.569542 | 0.994 | 0.856 | 0 T cells | Rps3          |
| 0 | 1.559502 | 0.994 | 0.826 | 0 T cells | Rpl19         |
| 0 | 1.546175 | 0.401 | 0.007 | 0 T cells | Cd4           |
| 0 | 1.540299 | 0.993 | 0.835 | 0 T cells | Rplp2         |
| 0 | 1.527523 | 0.995 | 0.787 | 0 T cells | Rpl32         |
| 0 | 1.527101 | 0.994 | 0.931 | 0 T cells | Rps29         |
| 0 | 1.506439 | 0.565 | 0.112 | 0 T cells | H2-Q7         |
| 0 | 1.504502 | 0.459 | 0.039 | 0 T cells | Gm8369        |
| 0 | 1.50328  | 0.557 | 0.1   | 0 T cells | Ptpcrap       |
| 0 | 1.502344 | 0.962 | 0.728 | 0 T cells | Rpl5          |
| 0 | 1.49862  | 0.416 | 0.025 | 0 T cells | Cd6           |
| 0 | 1.497819 | 0.989 | 0.889 | 0 T cells | Rps10         |
| 0 | 1.493399 | 0.992 | 0.838 | 0 T cells | Rpl39         |
| 0 | 1.492715 | 0.647 | 0.277 | 0 T cells | Zc3hav1       |
| 0 | 1.479234 | 0.476 | 0.034 | 0 T cells | Cd247         |
| 0 | 1.47143  | 0.431 | 0.033 | 0 T cells | 1700097N02Rik |
| 0 | 1.461608 | 0.467 | 0.167 | 0 T cells | Smc4          |
| 0 | 1.455205 | 0.996 | 0.888 | 0 T cells | Rpl17         |
| 0 | 1.451373 | 0.995 | 0.837 | 0 T cells | Rps11         |
| 0 | 1.433621 | 0.663 | 0.413 | 0 T cells | Saraf         |
| 0 | 1.433496 | 0.992 | 0.828 | 0 T cells | Rpl18         |
| 0 | 1.433396 | 0.611 | 0.14  | 0 T cells | 1-Sep         |
| 0 | 1.429389 | 0.993 | 0.851 | 0 T cells | Rps14         |
| 0 | 1.428492 | 0.427 | 0.065 | 0 T cells | Cd69          |
| 0 | 1.42741  | 0.57  | 0.228 | 0 T cells | Thy1          |
| 0 | 1.415844 | 0.361 | 0.015 | 0 T cells | Cd5           |
| 0 | 1.414824 | 0.397 | 0.023 | 0 T cells | Bcl11b        |
| 0 | 1.412115 | 0.831 | 0.56  | 0 T cells | Uba52         |
| 0 | 1.411517 | 0.994 | 0.832 | 0 T cells | Rps3a1        |
| 0 | 1.395129 | 0.992 | 0.865 | 0 T cells | Rplp1         |

|   |          |       |       |           |         |
|---|----------|-------|-------|-----------|---------|
| 0 | 1.394247 | 0.996 | 0.913 | 0 T cells | Rpl18a  |
| 0 | 1.390744 | 0.993 | 0.818 | 0 T cells | Rpl38   |
| 0 | 1.38836  | 0.974 | 0.77  | 0 T cells | Rpl27   |
| 0 | 1.383016 | 0.932 | 0.731 | 0 T cells | Eef1b2  |
| 0 | 1.381636 | 0.989 | 0.783 | 0 T cells | Rpl36   |
| 0 | 1.375898 | 0.965 | 0.763 | 0 T cells | Rps6    |
| 0 | 1.374129 | 0.895 | 0.644 | 0 T cells | Npm1    |
| 0 | 1.374073 | 0.529 | 0.102 | 0 T cells | Itgb7   |
| 0 | 1.371974 | 0.981 | 0.745 | 0 T cells | Rpl10a  |
| 0 | 1.371322 | 0.388 | 0.02  | 0 T cells | Tcf7    |
| 0 | 1.371105 | 0.732 | 0.383 | 0 T cells | Psmb8   |
| 0 | 1.370927 | 0.991 | 0.85  | 0 T cells | Rps21   |
| 0 | 1.364863 | 0.976 | 0.777 | 0 T cells | Rps28   |
| 0 | 1.362834 | 0.992 | 0.754 | 0 T cells | Rpl3    |
| 0 | 1.347869 | 0.997 | 0.892 | 0 T cells | Rpl23   |
| 0 | 1.335985 | 0.966 | 0.786 | 0 T cells | Rps26   |
| 0 | 1.333663 | 0.994 | 0.829 | 0 T cells | Rps23   |
| 0 | 1.328462 | 0.526 | 0.096 | 0 T cells | Ptpn22  |
| 0 | 1.323463 | 0.461 | 0.062 | 0 T cells | P2ry10  |
| 0 | 1.319856 | 0.444 | 0.061 | 0 T cells | Gimap9  |
| 0 | 1.319387 | 0.985 | 0.859 | 0 T cells | Rpl30   |
| 0 | 1.319048 | 0.99  | 0.847 | 0 T cells | Rpl8    |
| 0 | 1.313577 | 0.994 | 0.822 | 0 T cells | Rpl11   |
| 0 | 1.306874 | 0.793 | 0.485 | 0 T cells | Mbnl1   |
| 0 | 1.298762 | 0.888 | 0.667 | 0 T cells | Shisa5  |
| 0 | 1.297819 | 0.994 | 0.869 | 0 T cells | Rpl34   |
| 0 | 1.288026 | 0.81  | 0.561 | 0 T cells | Rps27rt |
| 0 | 1.281244 | 0.594 | 0.19  | 0 T cells | Tnfaip3 |
| 0 | 1.27695  | 0.43  | 0.053 | 0 T cells | Txk     |
| 0 | 1.275643 | 0.46  | 0.116 | 0 T cells | Dgka    |
| 0 | 1.270408 | 0.553 | 0.204 | 0 T cells | Itpkb   |
| 0 | 1.265337 | 0.992 | 0.799 | 0 T cells | Rps5    |
| 0 | 1.262248 | 0.994 | 0.862 | 0 T cells | Rpl37a  |
| 0 | 1.262052 | 0.983 | 0.782 | 0 T cells | Rpl15   |
| 0 | 1.260031 | 0.989 | 0.849 | 0 T cells | Rpl21   |
| 0 | 1.255715 | 0.966 | 0.742 | 0 T cells | Rack1   |
| 0 | 1.247501 | 0.992 | 0.803 | 0 T cells | Rpl6    |
| 0 | 1.245202 | 0.995 | 0.876 | 0 T cells | Rpl27a  |
| 0 | 1.234257 | 0.967 | 0.748 | 0 T cells | Rpl36a  |
| 0 | 1.232397 | 0.383 | 0.028 | 0 T cells | Klk8    |
| 0 | 1.23237  | 0.942 | 0.736 | 0 T cells | Rpl35   |
| 0 | 1.228894 | 0.995 | 0.916 | 0 T cells | Rpl9    |
| 0 | 1.224649 | 0.437 | 0.062 | 0 T cells | Sh2d2a  |
| 0 | 1.217515 | 0.967 | 0.776 | 0 T cells | Rps15   |
| 0 | 1.214468 | 0.366 | 0.026 | 0 T cells | Inpp4b  |
| 0 | 1.213704 | 0.996 | 0.808 | 0 T cells | Rps4x   |
| 0 | 1.200071 | 0.997 | 0.94  | 0 T cells | Rpl41   |
| 0 | 1.198164 | 0.306 | 0.047 | 0 T cells | Gpr183  |
| 0 | 1.194026 | 0.437 | 0.09  | 0 T cells | H2-Q6   |
| 0 | 1.192319 | 0.973 | 0.744 | 0 T cells | Rpl22   |
| 0 | 1.190149 | 0.995 | 0.954 | 0 T cells | Rps27a  |
| 0 | 1.188677 | 0.353 | 0.034 | 0 T cells | Zap70   |
| 0 | 1.177768 | 0.99  | 0.875 | 0 T cells | Rpl35a  |
| 0 | 1.167361 | 0.32  | 0.023 | 0 T cells | Slpr1   |

|   |          |       |       |           |         |
|---|----------|-------|-------|-----------|---------|
| 0 | 1.158636 | 0.637 | 0.242 | 0 T cells | Ltb     |
| 0 | 1.158202 | 0.339 | 0.029 | 0 T cells | Grap2   |
| 0 | 1.156105 | 0.303 | 0.046 | 0 T cells | Traf1   |
| 0 | 1.146128 | 0.37  | 0.039 | 0 T cells | Gpr132  |
| 0 | 1.137896 | 0.981 | 0.765 | 0 T cells | Rpl14   |
| 0 | 1.136192 | 0.923 | 0.738 | 0 T cells | Pabpc1  |
| 0 | 1.132438 | 0.984 | 0.898 | 0 T cells | B2m     |
| 0 | 1.125218 | 0.514 | 0.208 | 0 T cells | Pdcd4   |
| 0 | 1.124779 | 0.711 | 0.262 | 0 T cells | Hcst    |
| 0 | 1.114807 | 0.987 | 0.811 | 0 T cells | Rps2    |
| 0 | 1.11012  | 0.992 | 0.823 | 0 T cells | Rpl7    |
| 0 | 1.106703 | 0.997 | 0.967 | 0 T cells | Tpt1    |
| 0 | 1.100831 | 0.998 | 0.851 | 0 T cells | Rpl13   |
| 0 | 1.084581 | 0.389 | 0.063 | 0 T cells | Rhoh    |
| 0 | 1.078705 | 0.954 | 0.74  | 0 T cells | Rpl4    |
| 0 | 1.071788 | 0.943 | 0.755 | 0 T cells | Rpl23a  |
| 0 | 1.071665 | 0.309 | 0.034 | 0 T cells | Il21r   |
| 0 | 1.064238 | 0.499 | 0.156 | 0 T cells | Dusp2   |
| 0 | 1.063115 | 0.456 | 0.102 | 0 T cells | Ikzf1   |
| 0 | 1.06296  | 0.997 | 0.901 | 0 T cells | Eef1a1  |
| 0 | 1.061607 | 0.948 | 0.74  | 0 T cells | Naca    |
| 0 | 1.047332 | 0.997 | 0.991 | 0 T cells | Fau     |
| 0 | 1.045816 | 0.867 | 0.623 | 0 T cells | Rpl36a1 |
| 0 | 1.041642 | 0.993 | 0.888 | 0 T cells | Rps8    |
| 0 | 1.040069 | 0.431 | 0.08  | 0 T cells | Il2rg   |
| 0 | 1.04     | 0.99  | 0.814 | 0 T cells | Rpl24   |
| 0 | 1.036102 | 0.595 | 0.196 | 0 T cells | Fyb     |
| 0 | 1.033675 | 0.986 | 0.769 | 0 T cells | Ppia    |
| 0 | 1.030799 | 0.882 | 0.683 | 0 T cells | Rpl2211 |
| 0 | 1.029539 | 0.665 | 0.256 | 0 T cells | Fam107b |
| 0 | 1.023484 | 0.951 | 0.761 | 0 T cells | Rpl26   |
| 0 | 1.020322 | 0.974 | 0.841 | 0 T cells | Rpl28   |
| 0 | 1.009426 | 0.35  | 0.081 | 0 T cells | Frat2   |
| 0 | 1.008668 | 0.346 | 0.05  | 0 T cells | Gimap5  |
| 0 | 1.004569 | 0.733 | 0.31  | 0 T cells | Limd2   |
| 0 | 1.000353 | 0.295 | 0.044 | 0 T cells | Tagap   |
| 0 | -1.19081 | 0.627 | 0.905 | 0 T cells | Gabarap |
| 0 | -1.20756 | 0.008 | 0.422 | 0 T cells | Fermt2  |
| 0 | -1.23363 | 0.014 | 0.44  | 0 T cells | Fkbp9   |
| 0 | -1.25239 | 0.018 | 0.439 | 0 T cells | Selenon |
| 0 | -1.26555 | 0.013 | 0.434 | 0 T cells | Cald1   |
| 0 | -1.27325 | 0.018 | 0.44  | 0 T cells | Pkd2    |
| 0 | -1.29236 | 0.014 | 0.447 | 0 T cells | S100a16 |
| 0 | -1.30022 | 0.015 | 0.444 | 0 T cells | Itgb5   |
| 0 | -1.31155 | 0.249 | 0.677 | 0 T cells | Ptms    |
| 0 | -1.33508 | 0.014 | 0.441 | 0 T cells | Pdgfra  |
| 0 | -1.33747 | 0.015 | 0.442 | 0 T cells | Nfia    |
| 0 | -1.35034 | 0.049 | 0.473 | 0 T cells | Nfic    |
| 0 | -1.35851 | 0.016 | 0.44  | 0 T cells | Fhl1    |
| 0 | -1.3813  | 0.011 | 0.438 | 0 T cells | Entpd2  |
| 0 | -1.39954 | 0.315 | 0.676 | 0 T cells | Lamp1   |
| 0 | -1.40366 | 0.011 | 0.434 | 0 T cells | Adamts2 |
| 0 | -1.40571 | 0.163 | 0.627 | 0 T cells | Ctsz    |
| 0 | -1.41348 | 0.103 | 0.571 | 0 T cells | Dstn    |

|   |          |       |       |           |          |
|---|----------|-------|-------|-----------|----------|
| 0 | -1.42072 | 0.009 | 0.429 | 0 T cells | Fbln5    |
| 0 | -1.42176 | 0.014 | 0.441 | 0 T cells | Col5a1   |
| 0 | -1.42369 | 0.893 | 0.96  | 0 T cells | Itm2b    |
| 0 | -1.44615 | 0.019 | 0.458 | 0 T cells | Ddah2    |
| 0 | -1.45878 | 0.018 | 0.476 | 0 T cells | Fxyd1    |
| 0 | -1.46898 | 0.082 | 0.582 | 0 T cells | Tnfrsf1a |
| 0 | -1.47114 | 0.015 | 0.455 | 0 T cells | Lama2    |
| 0 | -1.48429 | 0.022 | 0.496 | 0 T cells | Fcgrt    |
| 0 | -1.5025  | 0.989 | 0.997 | 0 T cells | Fth1     |
| 0 | -1.50666 | 0.119 | 0.639 | 0 T cells | Lamp2    |
| 0 | -1.50955 | 0.019 | 0.46  | 0 T cells | Plxdc2   |
| 0 | -1.50981 | 0.474 | 0.914 | 0 T cells | S100a6   |
| 0 | -1.51432 | 0.013 | 0.467 | 0 T cells | Bicc1    |
| 0 | -1.51836 | 0.044 | 0.506 | 0 T cells | Rhoc     |
| 0 | -1.52776 | 0.018 | 0.462 | 0 T cells | Cavin3   |
| 0 | -1.53661 | 0.475 | 0.802 | 0 T cells | Sat1     |
| 0 | -1.54347 | 0.018 | 0.459 | 0 T cells | Nupr1    |
| 0 | -1.55135 | 0.017 | 0.444 | 0 T cells | Pam      |
| 0 | -1.56293 | 0.584 | 0.855 | 0 T cells | Dusp1    |
| 0 | -1.5754  | 0.013 | 0.461 | 0 T cells | Ptgis    |
| 0 | -1.5863  | 0.017 | 0.448 | 0 T cells | Oaf      |
| 0 | -1.58995 | 0.01  | 0.447 | 0 T cells | Ramp2    |
| 0 | -1.59678 | 0.038 | 0.557 | 0 T cells | Myadm    |
| 0 | -1.59979 | 0.954 | 0.993 | 0 T cells | Ftl1     |
| 0 | -1.62286 | 0.01  | 0.429 | 0 T cells | Adamts5  |
| 0 | -1.63532 | 0.052 | 0.482 | 0 T cells | Gpm6b    |
| 0 | -1.65452 | 0.468 | 0.845 | 0 T cells | Psap     |
| 0 | -1.65515 | 0.014 | 0.483 | 0 T cells | Cpq      |
| 0 | -1.66484 | 0.021 | 0.474 | 0 T cells | Olfml3   |
| 0 | -1.67453 | 0.03  | 0.517 | 0 T cells | Nedd4    |
| 0 | -1.67555 | 0.141 | 0.566 | 0 T cells | Cdkn1a   |
| 0 | -1.71185 | 0.015 | 0.494 | 0 T cells | Rhoj     |
| 0 | -1.72214 | 0.01  | 0.466 | 0 T cells | Tcf21    |
| 0 | -1.72501 | 0.258 | 0.659 | 0 T cells | Laptm4a  |
| 0 | -1.72705 | 0.04  | 0.514 | 0 T cells | Rcn3     |
| 0 | -1.75152 | 0.057 | 0.543 | 0 T cells | Nenf     |
| 0 | -1.76232 | 0.063 | 0.518 | 0 T cells | Lamc1    |
| 0 | -1.7648  | 0.063 | 0.546 | 0 T cells | Rnase4   |
| 0 | -1.77886 | 0.012 | 0.454 | 0 T cells | Islr     |
| 0 | -1.78534 | 0.015 | 0.502 | 0 T cells | Nfib     |
| 0 | -1.79237 | 0.031 | 0.503 | 0 T cells | Mxra8    |
| 0 | -1.79773 | 0.297 | 0.715 | 0 T cells | Zfp36    |
| 0 | -1.8056  | 0.167 | 0.586 | 0 T cells | Mtch1    |
| 0 | -1.81491 | 0.018 | 0.528 | 0 T cells | Cd302    |
| 0 | -1.82632 | 0.011 | 0.478 | 0 T cells | Ebf1     |
| 0 | -1.82741 | 0.025 | 0.499 | 0 T cells | Abca8a   |
| 0 | -1.83195 | 0.025 | 0.471 | 0 T cells | Lamb1    |
| 0 | -1.83725 | 0.245 | 0.822 | 0 T cells | Anxa2    |
| 0 | -1.8392  | 0.022 | 0.511 | 0 T cells | Sdc2     |
| 0 | -1.8678  | 0.185 | 0.58  | 0 T cells | Zbtb20   |
| 0 | -1.87314 | 0.035 | 0.505 | 0 T cells | Slc43a3  |
| 0 | -1.87729 | 0.013 | 0.452 | 0 T cells | Ogn      |
| 0 | -1.88584 | 0.292 | 0.645 | 0 T cells | Anxa5    |
| 0 | -1.91712 | 0.247 | 0.668 | 0 T cells | Rhob     |

|   |          |       |       |           |          |
|---|----------|-------|-------|-----------|----------|
| 0 | -1.91737 | 0.02  | 0.498 | 0 T cells | Prelp    |
| 0 | -1.9205  | 0.017 | 0.495 | 0 T cells | Tnxb     |
| 0 | -1.9217  | 0.026 | 0.534 | 0 T cells | Tcf4     |
| 0 | -1.92583 | 0.044 | 0.54  | 0 T cells | Klf9     |
| 0 | -1.9276  | 0.019 | 0.502 | 0 T cells | Loxl1    |
| 0 | -1.93515 | 0.021 | 0.578 | 0 T cells | Marcks   |
| 0 | -1.93991 | 0.03  | 0.604 | 0 T cells | App      |
| 0 | -1.9438  | 0.015 | 0.488 | 0 T cells | Plpp3    |
| 0 | -1.95036 | 0.048 | 0.519 | 0 T cells | Axl      |
| 0 | -1.95221 | 0.348 | 0.771 | 0 T cells | Neat1    |
| 0 | -1.99736 | 0.028 | 0.515 | 0 T cells | Rbp1     |
| 0 | -2.00779 | 0.016 | 0.483 | 0 T cells | Pcsk6    |
| 0 | -2.01679 | 0.044 | 0.553 | 0 T cells | Selenom  |
| 0 | -2.03632 | 0.025 | 0.515 | 0 T cells | Nfix     |
| 0 | -2.04446 | 0.024 | 0.465 | 0 T cells | Ckb      |
| 0 | -2.04758 | 0.027 | 0.506 | 0 T cells | Hspg2    |
| 0 | -2.05485 | 0.023 | 0.494 | 0 T cells | Col4a1   |
| 0 | -2.11643 | 0.023 | 0.528 | 0 T cells | Pmp22    |
| 0 | -2.12183 | 0.02  | 0.545 | 0 T cells | Lrp1     |
| 0 | -2.1223  | 0.076 | 0.662 | 0 T cells | Anxa1    |
| 0 | -2.16144 | 0.019 | 0.483 | 0 T cells | Gas1     |
| 0 | -2.19843 | 0.022 | 0.547 | 0 T cells | Lhfp     |
| 0 | -2.20719 | 0.02  | 0.609 | 0 T cells | Mgst1    |
| 0 | -2.22536 | 0.025 | 0.514 | 0 T cells | Nid1     |
| 0 | -2.24707 | 0.189 | 0.654 | 0 T cells | Cd9      |
| 0 | -2.25756 | 0.034 | 0.522 | 0 T cells | Fstl1    |
| 0 | -2.29256 | 0.022 | 0.531 | 0 T cells | Dpt      |
| 0 | -2.30369 | 0.051 | 0.523 | 0 T cells | Atf3     |
| 0 | -2.33054 | 0.021 | 0.435 | 0 T cells | Dpep1    |
| 0 | -2.33076 | 0.111 | 0.71  | 0 T cells | Litaf    |
| 0 | -2.35273 | 0.138 | 0.708 | 0 T cells | Timp2    |
| 0 | -2.37023 | 0.014 | 0.431 | 0 T cells | Meg3     |
| 0 | -2.45089 | 0.031 | 0.52  | 0 T cells | Fbln2    |
| 0 | -2.45712 | 0.035 | 0.519 | 0 T cells | Ccdc80   |
| 0 | -2.46755 | 0.03  | 0.509 | 0 T cells | Col15a1  |
| 0 | -2.47117 | 0.032 | 0.571 | 0 T cells | Gstm1    |
| 0 | -2.47697 | 0.023 | 0.522 | 0 T cells | Col6a2   |
| 0 | -2.47968 | 0.033 | 0.529 | 0 T cells | Serpinfl |
| 0 | -2.48862 | 0.039 | 0.471 | 0 T cells | Mfap5    |
| 0 | -2.49983 | 0.029 | 0.541 | 0 T cells | Mmp2     |
| 0 | -2.52486 | 0.122 | 0.602 | 0 T cells | Cd81     |
| 0 | -2.52762 | 0.539 | 0.806 | 0 T cells | Fos      |
| 0 | -2.52955 | 0.038 | 0.536 | 0 T cells | Cfh      |
| 0 | -2.56238 | 0.025 | 0.563 | 0 T cells | Rarres2  |
| 0 | -2.56247 | 0.033 | 0.544 | 0 T cells | Cd34     |
| 0 | -2.59389 | 0.146 | 0.631 | 0 T cells | Ctsl     |
| 0 | -2.60687 | 0.028 | 0.533 | 0 T cells | Col6a1   |
| 0 | -2.62873 | 0.04  | 0.71  | 0 T cells | Aldh2    |
| 0 | -2.64963 | 0.033 | 0.514 | 0 T cells | Smoc2    |
| 0 | -2.71388 | 0.543 | 0.877 | 0 T cells | Cebpb    |
| 0 | -2.77947 | 0.056 | 0.54  | 0 T cells | Klf4     |
| 0 | -2.79251 | 0.162 | 0.833 | 0 T cells | Ifitm2   |
| 0 | -2.80255 | 0.02  | 0.609 | 0 T cells | Crispld2 |
| 0 | -2.81609 | 0.03  | 0.562 | 0 T cells | Cygb     |

|       |          |       |       |               |          |
|-------|----------|-------|-------|---------------|----------|
| 0     | -2.87499 | 0.17  | 0.778 | 0 T cells     | Ifitm3   |
| 0     | -2.93621 | 0.048 | 0.67  | 0 T cells     | Cd63     |
| 0     | -2.97977 | 0.036 | 0.561 | 0 T cells     | Pcolce   |
| 0     | -3.00483 | 0.048 | 0.573 | 0 T cells     | Ltbp4    |
| 0     | -3.01255 | 0.166 | 0.594 | 0 T cells     | Egr1     |
| 0     | -3.06273 | 0.04  | 0.546 | 0 T cells     | Colla1   |
| 0     | -3.08889 | 0.047 | 0.539 | 0 T cells     | Fbln1    |
| 0     | -3.09771 | 0.037 | 0.547 | 0 T cells     | Serpinh1 |
| 0     | -3.15431 | 0.047 | 0.561 | 0 T cells     | Gpx3     |
| 0     | -3.16005 | 0.416 | 0.899 | 0 T cells     | Cst3     |
| 0     | -3.1769  | 0.045 | 0.561 | 0 T cells     | Colla2   |
| 0     | -3.19523 | 0.031 | 0.573 | 0 T cells     | G0s2     |
| 0     | -3.2921  | 0.053 | 0.649 | 0 T cells     | Pi16     |
| 0     | -3.33182 | 0.071 | 0.557 | 0 T cells     | Col3a1   |
| 0     | -3.40061 | 0.066 | 0.578 | 0 T cells     | Lum      |
| 0     | -3.41337 | 0.176 | 0.584 | 0 T cells     | Mt1      |
| 0     | -3.42678 | 0.041 | 0.574 | 0 T cells     | Serping1 |
| 0     | -3.62021 | 0.053 | 0.571 | 0 T cells     | Clec3b   |
| 0     | -3.62269 | 0.041 | 0.536 | 0 T cells     | Lpl      |
| 0     | -3.6793  | 0.07  | 0.585 | 0 T cells     | Sparc    |
| 0     | -3.72595 | 0.065 | 0.591 | 0 T cells     | Sparcl1  |
| 0     | -3.78678 | 0.169 | 0.622 | 0 T cells     | Igfbp7   |
| 0     | -3.85201 | 0.078 | 0.591 | 0 T cells     | Htra3    |
| 0     | -3.92829 | 0.09  | 0.599 | 0 T cells     | Bgn      |
| 0     | -4.35562 | 0.085 | 0.727 | 0 T cells     | Cebpd    |
| 0     | -4.45653 | 0.157 | 0.621 | 0 T cells     | Mgp      |
| 0     | -5.40185 | 0.424 | 0.815 | 0 T cells     | Gsn      |
| 0     | -5.40273 | 0.288 | 0.687 | 0 T cells     | Dcn      |
| ##### | -1.77586 | 0.07  | 0.491 | ##### T cells | Ier3     |
| ##### | -1.31444 | 0.017 | 0.429 | ##### T cells | Col5a2   |
| ##### | -2.66318 | 0.03  | 0.437 | ##### T cells | Thbs1    |
| ##### | -1.08973 | 0.011 | 0.42  | ##### T cells | Ckap4    |
| ##### | -1.22411 | 0.013 | 0.418 | ##### T cells | Mxra7    |
| ##### | -1.34971 | 0.012 | 0.416 | ##### T cells | Ace      |
| ##### | -1.3025  | 0.014 | 0.417 | ##### T cells | Sod3     |
| ##### | -1.21426 | 0.01  | 0.411 | ##### T cells | Nav1     |
| ##### | -1.28352 | 0.017 | 0.418 | ##### T cells | Emilin1  |
| ##### | 1.027453 | 0.498 | 0.176 | ##### T cells | Dusp5    |
| ##### | -1.60045 | 0.099 | 0.507 | ##### T cells | Crip2    |
| ##### | -2.06429 | 0.117 | 0.515 | ##### T cells | Id3      |
| ##### | -1.10322 | 0.014 | 0.414 | ##### T cells | Fgfr1    |
| ##### | -1.20307 | 0.05  | 0.456 | ##### T cells | Rras     |
| ##### | -1.51037 | 0.016 | 0.414 | ##### T cells | Col6a3   |
| ##### | -3.09105 | 0.061 | 0.459 | ##### T cells | Hspb1    |
| ##### | 1.219925 | 0.575 | 0.288 | ##### T cells | Peli1    |
| ##### | -1.37674 | 0.015 | 0.412 | ##### T cells | Fbn1     |
| ##### | -1.6615  | 0.019 | 0.416 | ##### T cells | Col8a1   |
| ##### | -1.2825  | 0.014 | 0.408 | ##### T cells | Medag    |
| ##### | -1.21345 | 0.011 | 0.405 | ##### T cells | Lama4    |
| ##### | -1.0536  | 0.017 | 0.413 | ##### T cells | Fkbp7    |
| ##### | -1.71545 | 0.015 | 0.408 | ##### T cells | Timp3    |
| ##### | -2.00752 | 0.193 | 0.611 | ##### T cells | Grina    |
| ##### | -2.72262 | 0.415 | 0.668 | ##### T cells | Jun      |
| ##### | -1.24807 | 0.145 | 0.543 | ##### T cells | Tmed3    |

|       |          |       |       |       |         |           |
|-------|----------|-------|-------|-------|---------|-----------|
| ##### | -1.34629 | 0.008 | 0.396 | ##### | T cells | Ppp1r14a  |
| ##### | -1.11765 | 0.011 | 0.401 | ##### | T cells | Cavin1    |
| ##### | -1.05928 | 0.011 | 0.4   | ##### | T cells | P3h3      |
| ##### | -1.67586 | 0.091 | 0.487 | ##### | T cells | Ecml      |
| ##### | -1.51827 | 0.015 | 0.405 | ##### | T cells | Pcolce2   |
| ##### | -1.76534 | 0.01  | 0.395 | ##### | T cells | Tnfaip2   |
| ##### | -3.28882 | 0.072 | 0.458 | ##### | T cells | Apoe      |
| ##### | -1.19249 | 0.009 | 0.392 | ##### | T cells | Aebp1     |
| ##### | 1.212303 | 0.697 | 0.431 | ##### | T cells | Gm11808   |
| ##### | -1.30792 | 0.017 | 0.404 | ##### | T cells | Selenbp1  |
| ##### | -1.52569 | 0.037 | 0.426 | ##### | T cells | Atf5      |
| ##### | -1.23846 | 0.112 | 0.523 | ##### | T cells | Dhrs7     |
| ##### | -2.04903 | 0.026 | 0.411 | ##### | T cells | C3        |
| ##### | -1.01907 | 0.077 | 0.485 | ##### | T cells | Hexa      |
| ##### | -1.15507 | 0.116 | 0.524 | ##### | T cells | Sntb2     |
| ##### | -1.13968 | 0.084 | 0.482 | ##### | T cells | Txndc5    |
| ##### | -1.47808 | 0.216 | 0.568 | ##### | T cells | Sptbn1    |
| ##### | -1.04427 | 0.068 | 0.469 | ##### | T cells | Grn       |
| ##### | -1.4213  | 0.064 | 0.46  | ##### | T cells | Spry1     |
| ##### | -1.10351 | 0.049 | 0.444 | ##### | T cells | Rnf130    |
| ##### | -1.11419 | 0.017 | 0.396 | ##### | T cells | Il11ral   |
| ##### | -1.04829 | 0.013 | 0.389 | ##### | T cells | Mmp23     |
| ##### | -1.26733 | 0.011 | 0.384 | ##### | T cells | Tm4sf1    |
| ##### | -1.08709 | 0.01  | 0.383 | ##### | T cells | Dpysl3    |
| ##### | -1.03231 | 0.014 | 0.386 | ##### | T cells | Eng       |
| ##### | -1.28827 | 0.018 | 0.393 | ##### | T cells | Serpine2  |
| ##### | -1.08177 | 0.009 | 0.38  | ##### | T cells | Vwal      |
| ##### | -1.00268 | 0.009 | 0.378 | ##### | T cells | Lpar1     |
| ##### | -1.27058 | 0.011 | 0.377 | ##### | T cells | Htral     |
| ##### | -1.00219 | 0.239 | 0.642 | ##### | T cells | Bri3      |
| ##### | 1.18356  | 0.559 | 0.289 | ##### | T cells | Smad7     |
| ##### | -1.46757 | 0.286 | 0.614 | ##### | T cells | Selenop   |
| ##### | -1.63056 | 0.013 | 0.376 | ##### | T cells | Spon2     |
| ##### | -1.25659 | 0.107 | 0.495 | ##### | T cells | Empl      |
| ##### | -1.59353 | 0.018 | 0.381 | ##### | T cells | Aspn      |
| ##### | -1.22177 | 0.008 | 0.368 | ##### | T cells | Plala     |
| ##### | 1.018382 | 0.439 | 0.181 | ##### | T cells | Srpkl     |
| ##### | -1.0846  | 0.088 | 0.466 | ##### | T cells | Calu      |
| ##### | -1.00011 | 0.038 | 0.412 | ##### | T cells | Zeb2      |
| ##### | -1.11462 | 0.008 | 0.367 | ##### | T cells | Col4a2    |
| ##### | -1.04689 | 0.079 | 0.459 | ##### | T cells | Vkorc1    |
| ##### | -1.40637 | 0.013 | 0.371 | ##### | T cells | Gfpt2     |
| ##### | -1.06526 | 0.24  | 0.637 | ##### | T cells | Ppp1r2    |
| ##### | -1.38513 | 0.026 | 0.388 | ##### | T cells | Jdp2      |
| ##### | -1.51951 | 0.112 | 0.481 | ##### | T cells | Errfil    |
| ##### | -1.17894 | 0.204 | 0.566 | ##### | T cells | Ybx3      |
| ##### | -1.34703 | 0.013 | 0.365 | ##### | T cells | Eln       |
| ##### | -1.28928 | 0.013 | 0.363 | ##### | T cells | Gda       |
| ##### | -2.72011 | 0.029 | 0.377 | ##### | T cells | Cxcl1     |
| ##### | -1.45425 | 0.014 | 0.361 | ##### | T cells | Nbl1      |
| ##### | -1.05291 | 0.024 | 0.377 | ##### | T cells | Tcn2      |
| ##### | -1.33362 | 0.161 | 0.517 | ##### | T cells | Serpinb6a |
| ##### | -1.18188 | 0.01  | 0.351 | ##### | T cells | Col5a3    |
| ##### | -1.30012 | 0.011 | 0.353 | ##### | T cells | Gsta3     |

|       |          |       |       |       |         |         |
|-------|----------|-------|-------|-------|---------|---------|
| ##### | -2.97039 | 0.038 | 0.376 | ##### | T cells | Fcer1g  |
| ##### | -1.64411 | 0.469 | 0.839 | ##### | T cells | S100a11 |
| ##### | 1.265286 | 0.75  | 0.545 | ##### | T cells | Rpl13a  |
| ##### | -1.1388  | 0.012 | 0.347 | ##### | T cells | Sfrp1   |
| ##### | -1.05494 | 0.006 | 0.34  | ##### | T cells | Scara5  |
| ##### | -1.05044 | 0.369 | 0.649 | ##### | T cells | Bsg     |
| ##### | -1.51044 | 0.015 | 0.349 | ##### | T cells | Emilin2 |
| ##### | -1.07533 | 0.096 | 0.45  | ##### | T cells | Slc29a1 |
| ##### | -1.59298 | 0.077 | 0.427 | ##### | T cells | Trib1   |
| ##### | -1.05672 | 0.041 | 0.387 | ##### | T cells | Angptl2 |
| ##### | -1.09811 | 0.011 | 0.344 | ##### | T cells | Fxyd6   |
| ##### | -1.20041 | 0.49  | 0.81  | ##### | T cells | Txn1    |
| ##### | -3.80873 | 0.066 | 0.393 | ##### | T cells | Tyropb  |
| ##### | -1.11495 | 0.126 | 0.491 | ##### | T cells | Camk2n1 |
| ##### | -2.18281 | 0.02  | 0.351 | ##### | T cells | Cyr61   |
| ##### | -3.23865 | 0.172 | 0.507 | ##### | T cells | Msrbl   |
| ##### | -1.12378 | 0.011 | 0.33  | ##### | T cells | Fibin   |
| ##### | -1.02627 | 0.128 | 0.492 | ##### | T cells | Cregl   |
| ##### | -1.37298 | 0.231 | 0.594 | ##### | T cells | Zyx     |
| ##### | -1.12881 | 0.316 | 0.676 | ##### | T cells | Rab7    |
| ##### | -1.1456  | 0.011 | 0.326 | ##### | T cells | Adamts1 |
| ##### | -1.39125 | 0.328 | 0.683 | ##### | T cells | Prdx5   |
| ##### | -1.04683 | 0.012 | 0.323 | ##### | T cells | Gas6    |
| ##### | -1.21139 | 0.32  | 0.597 | ##### | T cells | Cyb5a   |
| ##### | -1.10694 | 0.006 | 0.305 | ##### | T cells | Fmo2    |
| ##### | -1.08918 | 0.008 | 0.302 | ##### | T cells | Sirpa   |
| ##### | -1.18038 | 0.015 | 0.313 | ##### | T cells | Tppp3   |
| ##### | -2.61457 | 0.027 | 0.32  | ##### | T cells | Alox5ap |
| ##### | 1.003822 | 0.546 | 0.329 | ##### | T cells | Atp1b3  |
| ##### | -1.25518 | 0.074 | 0.388 | ##### | T cells | Snap23  |
| ##### | -1.32233 | 0.011 | 0.299 | ##### | T cells | Ackr3   |
| ##### | -1.38925 | 0.27  | 0.559 | ##### | T cells | Fosb    |
| ##### | -1.13323 | 0.184 | 0.518 | ##### | T cells | Ndel1   |
| ##### | -1.46686 | 0.076 | 0.379 | ##### | T cells | Gadd45g |
| ##### | 1.213994 | 0.45  | 0.232 | ##### | T cells | Bcl2    |
| ##### | -1.6601  | 0.019 | 0.301 | ##### | T cells | Ctgf    |
| ##### | -2.16465 | 0.016 | 0.293 | ##### | T cells | Ncf2    |
| ##### | -1.27358 | 0.018 | 0.298 | ##### | T cells | Tgm2    |
| ##### | -1.04096 | 0.176 | 0.507 | ##### | T cells | Ehd1    |
| ##### | -1.07215 | 0.052 | 0.349 | ##### | T cells | Bag3    |
| ##### | -1.72304 | 0.034 | 0.315 | ##### | T cells | Tgfb1   |
| ##### | -1.20998 | 0.102 | 0.403 | ##### | T cells | Uap1    |
| ##### | -1.05184 | 0.008 | 0.275 | ##### | T cells | Pgf     |
| ##### | -1.90962 | 0.011 | 0.276 | ##### | T cells | Spil    |
| ##### | 1.007295 | 0.325 | 0.116 | ##### | T cells | Bcl2a1b |
| ##### | -2.53404 | 0.015 | 0.278 | ##### | T cells | Csf3r   |
| ##### | -1.447   | 0.188 | 0.485 | ##### | T cells | Ly6a    |
| ##### | -1.07887 | 0.642 | 0.777 | ##### | T cells | Vim     |
| ##### | -2.3943  | 0.052 | 0.322 | ##### | T cells | Lst1    |
| ##### | -1.18898 | 0.019 | 0.286 | ##### | T cells | Hmox1   |
| ##### | -2.7454  | 0.021 | 0.282 | ##### | T cells | Hp      |
| ##### | -2.32133 | 0.056 | 0.326 | ##### | T cells | Slc16a3 |
| ##### | -1.00706 | 0.018 | 0.28  | ##### | T cells | Mafb    |
| ##### | -2.91251 | 0.039 | 0.301 | ##### | T cells | Ccl6    |



|          |          |       |       |          |           |          |
|----------|----------|-------|-------|----------|-----------|----------|
| #####    | -2.33994 | 0.012 | 0.266 | #####    | T cells   | Clec4d   |
| #####    | -1.71714 | 0.313 | 0.546 | #####    | T cells   | Socs3    |
| #####    | -1.44802 | 0.054 | 0.327 | #####    | T cells   | Mt2      |
| #####    | -1.13306 | 0.012 | 0.267 | #####    | T cells   | Tnfaip6  |
| #####    | 1.098713 | 0.355 | 0.163 | #####    | T cells   | Ass1     |
| #####    | -2.79143 | 0.019 | 0.27  | #####    | T cells   | Hdc      |
| #####    | -1.14403 | 0.013 | 0.262 | #####    | T cells   | Igfbp6   |
| #####    | -2.01877 | 0.077 | 0.341 | #####    | T cells   | Plaur    |
| #####    | -3.50613 | 0.041 | 0.29  | #####    | T cells   | Il1b     |
| #####    | -1.16427 | 0.052 | 0.317 | #####    | T cells   | Kctd12   |
| #####    | 1.679255 | 0.391 | 0.193 | #####    | T cells   | S100a4   |
| #####    | -1.09436 | 0.307 | 0.57  | #####    | T cells   | Igfbp4   |
| #####    | -1.80555 | 0.015 | 0.258 | #####    | T cells   | Mfap4    |
| #####    | -1.99937 | 0.024 | 0.264 | #####    | T cells   | Ccr1     |
| #####    | -3.0076  | 0.04  | 0.277 | #####    | T cells   | Il1r2    |
| #####    | -1.62639 | 0.41  | 0.68  | #####    | T cells   | Taldol   |
| #####    | -1.97232 | 0.03  | 0.264 | #####    | T cells   | Ifitm1   |
| #####    | -2.8575  | 0.055 | 0.289 | #####    | T cells   | Ccr12    |
| #####    | -1.1661  | 0.099 | 0.357 | #####    | T cells   | Ugdh     |
| #####    | -1.05709 | 0.056 | 0.296 | #####    | T cells   | Ly6c1    |
| #####    | -4.25942 | 0.107 | 0.335 | #####    | T cells   | Lyz2     |
| #####    | -1.05265 | 0.135 | 0.392 | #####    | T cells   | Hsd11b1  |
| #####    | -1.18633 | 0.095 | 0.343 | #####    | T cells   | Tmcc1    |
| #####    | -1.43997 | 0.065 | 0.292 | #####    | T cells   | Tpd52    |
| #####    | -1.16207 | 0.137 | 0.386 | #####    | T cells   | Nudt4    |
| #####    | -1.09919 | 0.55  | 0.649 | #####    | T cells   | Tubala   |
| #####    | -6.14933 | 0.273 | 0.492 | #####    | T cells   | S100a8   |
| #####    | -1.04706 | 0.214 | 0.46  | #####    | T cells   | Pnp      |
| #####    | 1.186522 | 0.586 | 0.435 | #####    | T cells   | AW112010 |
| #####    | -5.26821 | 0.141 | 0.352 | #####    | T cells   | Retnlg   |
| #####    | -1.22461 | 0.097 | 0.322 | #####    | T cells   | Ninjl    |
| #####    | -6.39315 | 0.317 | 0.526 | #####    | T cells   | S100a9   |
| #####    | -1.04153 | 0.153 | 0.39  | #####    | T cells   | Fgl2     |
| 2.46E-99 | -1.1562  | 0.43  | 0.609 | 4.43E-95 | T cells   | Hspalb   |
| 7.40E-94 | -1.53231 | 0.162 | 0.362 | 1.33E-89 | T cells   | Rnf149   |
| 5.12E-92 | -1.3364  | 0.069 | 0.251 | 9.22E-88 | T cells   | Lilr4b   |
| 1.03E-91 | -1.43489 | 0.149 | 0.346 | 1.85E-87 | T cells   | Ets2     |
| 1.05E-85 | -1.36805 | 0.085 | 0.263 | 1.89E-81 | T cells   | Stx11    |
| 1.16E-58 | -1.70689 | 0.166 | 0.297 | 2.10E-54 | T cells   | Lmnbl    |
| 6.12E-42 | -1.04243 | 0.214 | 0.332 | 1.10E-37 | T cells   | Cd44     |
| 1.43E-38 | -1.40741 | 0.197 | 0.295 | 2.58E-34 | T cells   | Pglyrp1  |
| 1.83E-27 | -1.85557 | 0.312 | 0.367 | 3.29E-23 | T cells   | Mxd1     |
| 1.38E-26 | -1.11576 | 0.179 | 0.279 | 2.49E-22 | T cells   | Isg15    |
| 2.11E-09 | -2.39464 | 0.671 | 0.669 | 3.80E-05 | T cells   | Hbb-bs   |
| 0        | 5.325862 | 0.49  | 0.015 |          | Monocytes | Ccl24    |
| 0        | 4.039436 | 0.809 | 0.08  |          | Monocytes | Plac8    |
| 0        | 3.754968 | 0.935 | 0.088 |          | Monocytes | Ctss     |
| 0        | 3.739459 | 0.823 | 0.024 |          | Monocytes | Ccl9     |
| 0        | 3.553024 | 0.336 | 0.007 |          | Monocytes | Arg1     |
| 0        | 3.322264 | 0.909 | 0.255 |          | Monocytes | Tgfb1    |
| 0        | 3.134635 | 0.734 | 0.031 |          | Monocytes | Fcgr2b   |
| 0        | 3.103267 | 0.406 | 0.054 |          | Monocytes | H2-Ab1   |
| 0        | 3.073171 | 0.943 | 0.276 |          | Monocytes | Lgals3   |
| 0        | 3.033736 | 0.467 | 0.01  |          | Monocytes | Chil3    |

|   |          |       |       |                    |
|---|----------|-------|-------|--------------------|
| 0 | 2.974895 | 0.807 | 0.025 | 0 MonocytesMs4a6c  |
| 0 | 2.959182 | 0.736 | 0.004 | 0 MonocytesMs4a6d  |
| 0 | 2.943074 | 0.433 | 0.057 | 0 MonocytesH2-Aa   |
| 0 | 2.870181 | 0.705 | 0.165 | 0 MonocytesFn1     |
| 0 | 2.850571 | 0.617 | 0.09  | 0 MonocytesCd74    |
| 0 | 2.766497 | 0.621 | 0.006 | 0 MonocytesGatm    |
| 0 | 2.752429 | 0.909 | 0.281 | 0 MonocytesLyz2    |
| 0 | 2.640781 | 0.447 | 0.068 | 0 MonocytesCcl2    |
| 0 | 2.586441 | 0.892 | 0.184 | 0 MonocytesS100a4  |
| 0 | 2.371573 | 0.737 | 0.058 | 0 MonocytesCcr2    |
| 0 | 2.36191  | 0.99  | 0.794 | 0 MonocytesPsap    |
| 0 | 2.352148 | 0.712 | 0.092 | 0 MonocytesCtsc    |
| 0 | 2.241866 | 0.519 | 0.019 | 0 MonocytesH2-DMb1 |
| 0 | 2.16606  | 0.661 | 0.007 | 0 MonocytesPld4    |
| 0 | 2.126497 | 0.695 | 0.05  | 0 MonocytesWfdc17  |
| 0 | 2.083702 | 0.917 | 0.615 | 0 MonocytesRbm3    |
| 0 | 2.01572  | 0.581 | 0.046 | 0 MonocytesH2-DMA  |
| 0 | 2.004632 | 0.329 | 0.002 | 0 MonocytesMrc1    |
| 0 | 2.003896 | 0.542 | 0.109 | 0 MonocytesLy6c2   |
| 0 | 1.939564 | 0.452 | 0.002 | 0 MonocytesF13a1   |
| 0 | 1.906394 | 0.945 | 0.675 | 0 MonocytesGpx1    |
| 0 | 1.882045 | 0.498 | 0.003 | 0 MonocytesF10     |
| 0 | 1.879738 | 0.659 | 0.12  | 0 MonocytesCtsh    |
| 0 | 1.872053 | 0.503 | 0.003 | 0 MonocytesAif1    |
| 0 | 1.781763 | 0.661 | 0.083 | 0 MonocytesNapsa   |
| 0 | 1.776008 | 0.596 | 0.08  | 0 MonocytesCybb    |
| 0 | 1.754171 | 0.605 | 0.086 | 0 MonocytesCfp     |
| 0 | 1.727696 | 0.311 | 0.005 | 0 MonocytesCdh1    |
| 0 | 1.682083 | 0.614 | 0.065 | 0 MonocytesCsflr   |
| 0 | 1.660508 | 0.927 | 0.31  | 0 MonocytesFcer1g  |
| 0 | 1.648492 | 0.569 | 0.055 | 0 MonocytesMpeg1   |
| 0 | 1.642724 | 0.998 | 0.871 | 0 MonocytesRpl37a  |
| 0 | 1.61685  | 0.575 | 0.03  | 0 MonocytesPlekho1 |
| 0 | 1.608394 | 0.607 | 0.078 | 0 MonocytesCd68    |
| 0 | 1.595757 | 0.996 | 0.79  | 0 MonocytesRps28   |
| 0 | 1.583206 | 0.594 | 0.073 | 0 MonocytesPlbd1   |
| 0 | 1.572448 | 0.456 | 0.092 | 0 MonocytesCasp6   |
| 0 | 1.549045 | 0.595 | 0.141 | 0 MonocytesPycard  |
| 0 | 1.544623 | 0.466 | 0.004 | 0 MonocytesClec4a1 |
| 0 | 1.526389 | 0.482 | 0.049 | 0 MonocytesLtb4r1  |
| 0 | 1.525471 | 1     | 0.944 | 0 MonocytesRpl41   |
| 0 | 1.518985 | 0.655 | 0.186 | 0 MonocytesFam96a  |
| 0 | 1.46571  | 0.546 | 0.059 | 0 MonocytesIrf5    |
| 0 | 1.436955 | 0.973 | 0.811 | 0 MonocytesCox4i1  |
| 0 | 1.424713 | 0.452 | 0.014 | 0 MonocytesLy86    |
| 0 | 1.415909 | 0.747 | 0.198 | 0 MonocytesFcgr3   |
| 0 | 1.400148 | 0.508 | 0.074 | 0 MonocytesIfitm6  |
| 0 | 1.380197 | 0.334 | 0.035 | 0 MonocytesGngt2   |
| 0 | 1.369103 | 0.893 | 0.259 | 0 MonocytesAlox5ap |
| 0 | 1.359548 | 0.408 | 0.006 | 0 MonocytesClec4a3 |
| 0 | 1.344341 | 0.545 | 0.113 | 0 MonocytesRpl29   |
| 0 | 1.336634 | 0.385 | 0.015 | 0 MonocytesMs4a4c  |
| 0 | 1.269778 | 0.342 | 0.001 | 0 MonocytesMsr1    |
| 0 | 1.261177 | 0.587 | 0.121 | 0 MonocytesItgam   |

|       |          |       |       |       |                  |
|-------|----------|-------|-------|-------|------------------|
| 0     | 1.243644 | 0.496 | 0.107 | 0     | MonocytesMcu     |
| 0     | 1.236558 | 0.347 | 0.008 | 0     | MonocytesP2ry6   |
| 0     | 1.22516  | 0.384 | 0.039 | 0     | MonocytesCcr5    |
| 0     | 1.218931 | 0.274 | 0.001 | 0     | MonocytesFcgr1   |
| 0     | 1.171249 | 0.307 | 0.001 | 0     | MonocytesTrem2   |
| 0     | 1.115527 | 0.293 | 0.008 | 0     | MonocytesLair1   |
| 0     | 1.10212  | 0.417 | 0.029 | 0     | MonocytesNrros   |
| 0     | 1.091362 | 0.478 | 0.07  | 0     | MonocytesSirpb1b |
| 0     | 1.074101 | 0.469 | 0.061 | 0     | MonocytesSirpb1c |
| 0     | 1.063617 | 0.259 | 0.003 | 0     | MonocytesBatf3   |
| 0     | 1.044504 | 0.997 | 0.986 | 0     | MonocytesRps9    |
| 0     | 1.0295   | 0.338 | 0.004 | 0     | MonocytesRassf4  |
| 0     | 1.024591 | 0.322 | 0.005 | 0     | MonocytesAdgre1  |
| ##### | 1.480032 | 0.836 | 0.311 | ##### | MonocytesFam49b  |
| ##### | 1.202241 | 0.996 | 0.935 | ##### | MonocytesRps29   |
| ##### | 1.577736 | 0.923 | 0.676 | ##### | MonocytesNpc2    |
| ##### | 2.322149 | 0.661 | 0.231 | ##### | MonocytesMafb    |
| ##### | 1.044902 | 0.526 | 0.109 | ##### | MonocytesCyth4   |
| ##### | 1.438124 | 0.572 | 0.142 | ##### | MonocytesTrf     |
| ##### | 1.552272 | 0.977 | 0.763 | ##### | MonocytesRps18   |
| ##### | 1.730475 | 0.748 | 0.308 | ##### | MonocytesAprt    |
| ##### | 1.128477 | 0.481 | 0.093 | ##### | MonocytesClec4a2 |
| ##### | -1.0617  | 0.996 | 0.996 | ##### | MonocytesMalat1  |
| ##### | 1.396962 | 0.961 | 0.797 | ##### | MonocytesAtp5l   |
| ##### | 1.061513 | 0.385 | 0.063 | ##### | MonocytesIfi209  |
| ##### | 1.594192 | 0.655 | 0.228 | ##### | MonocytesNme2    |
| ##### | 1.583343 | 0.956 | 0.751 | ##### | MonocytesRpl35   |
| ##### | 1.326628 | 0.936 | 0.771 | ##### | MonocytesSem1    |
| ##### | 1.609199 | 0.92  | 0.656 | ##### | MonocytesSec61g  |
| ##### | 2.241062 | 0.626 | 0.223 | ##### | MonocytesLgmn    |
| ##### | 1.147321 | 0.964 | 0.904 | ##### | MonocytesCfl1    |
| ##### | 1.421496 | 0.908 | 0.639 | ##### | MonocytesRpl36a1 |
| ##### | 1.345009 | 0.961 | 0.768 | ##### | MonocytesRpl23a  |
| ##### | 1.403523 | 0.93  | 0.682 | ##### | MonocytesRps17   |
| ##### | 1.125797 | 0.995 | 0.846 | ##### | MonocytesRplp2   |
| ##### | 1.858838 | 0.867 | 0.577 | ##### | MonocytesUba52   |
| ##### | 1.504832 | 0.852 | 0.557 | ##### | MonocytesAtox1   |
| ##### | 1.499731 | 0.85  | 0.563 | ##### | MonocytesSlc25a5 |
| ##### | 1.137263 | 0.964 | 0.854 | ##### | MonocytesRpl10   |
| ##### | 1.279272 | 0.397 | 0.089 | ##### | MonocytesFam129b |
| ##### | 1.252545 | 0.879 | 0.476 | ##### | MonocytesUcp2    |
| ##### | 1.63781  | 0.798 | 0.439 | ##### | MonocytesEno1    |
| ##### | 1.525256 | 0.862 | 0.554 | ##### | MonocytesRpl13a  |
| ##### | 1.002333 | 0.612 | 0.175 | ##### | MonocytesLyn     |
| ##### | 1.249698 | 0.792 | 0.297 | ##### | MonocytesCd44    |
| ##### | 1.427377 | 0.707 | 0.31  | ##### | MonocytesGm2a    |
| ##### | 1.544086 | 0.586 | 0.22  | ##### | MonocytesHebp1   |
| ##### | 1.704699 | 0.789 | 0.446 | ##### | MonocytesMrpl52  |
| ##### | 1.293237 | 0.948 | 0.778 | ##### | MonocytesRps6    |
| ##### | 1.283937 | 0.883 | 0.579 | ##### | MonocytesSub1    |
| ##### | 1.200268 | 0.934 | 0.804 | ##### | MonocytesCyba    |
| ##### | 1.334538 | 0.619 | 0.229 | ##### | MonocytesUnc93b1 |
| ##### | 1.265233 | 0.439 | 0.107 | ##### | MonocytesDok2    |
| ##### | 1.368819 | 0.815 | 0.498 | ##### | MonocytesCapza2  |

|       |          |       |       |       |                        |
|-------|----------|-------|-------|-------|------------------------|
| ##### | 1.484811 | 0.669 | 0.288 | ##### | MonocytesSnx5          |
| ##### | 1.271273 | 0.886 | 0.653 | ##### | MonocytesSec61b        |
| ##### | 1.736641 | 0.735 | 0.383 | ##### | MonocytesCstb          |
| ##### | 1.268147 | 0.594 | 0.216 | ##### | MonocytesMetrnl        |
| ##### | 1.255875 | 0.866 | 0.562 | ##### | MonocytesCtsz          |
| ##### | 1.08029  | 0.917 | 0.806 | ##### | MonocytesArpc2         |
| ##### | 1.306132 | 0.814 | 0.508 | ##### | MonocytesEif4a1        |
| ##### | 1.30391  | 0.844 | 0.564 | ##### | Monocytes2010107E04Rik |
| ##### | 1.645958 | 0.748 | 0.372 | ##### | MonocytesId2           |
| ##### | 1.017024 | 0.369 | 0.088 | ##### | MonocytesArrdc4        |
| ##### | 1.51553  | 0.87  | 0.598 | ##### | MonocytesCtsb          |
| ##### | 1.588351 | 0.912 | 0.663 | ##### | MonocytesCrip1         |
| ##### | 1.186391 | 0.497 | 0.154 | ##### | MonocytesHopx          |
| ##### | 1.432462 | 0.462 | 0.154 | ##### | MonocytesNaaa          |
| ##### | -2.33016 | 0.077 | 0.557 | ##### | MonocytesZbtb20        |
| ##### | -3.53296 | 0.078 | 0.553 | ##### | MonocytesSparcl1       |
| ##### | -1.88398 | 0.238 | 0.663 | ##### | MonocytesTimp2         |
| ##### | 1.340235 | 0.756 | 0.448 | ##### | MonocytesCops9         |
| ##### | 1.227658 | 0.825 | 0.575 | ##### | MonocytesPsma7         |
| ##### | -3.86635 | 0.1   | 0.562 | ##### | MonocytesBgn           |
| ##### | 1.201333 | 0.862 | 0.675 | ##### | MonocytesClta          |
| ##### | -2.48469 | 0.094 | 0.563 | ##### | MonocytesCrispld2      |
| ##### | -2.25737 | 0.286 | 0.655 | ##### | MonocytesTubala        |
| ##### | 1.185034 | 0.77  | 0.447 | ##### | MonocytesGm11808       |
| ##### | -3.24594 | 0.061 | 0.535 | ##### | MonocytesSerp1ng1      |
| ##### | -1.43121 | 0.432 | 0.83  | ##### | MonocytesPnrc1         |
| ##### | -2.83786 | 0.058 | 0.535 | ##### | MonocytesLtbp4         |
| ##### | -2.65034 | 0.04  | 0.523 | ##### | MonocytesCygb          |
| ##### | 2.281794 | 0.265 | 0.049 | ##### | MonocytesH2-Eb1        |
| ##### | 1.264722 | 0.797 | 0.487 | ##### | MonocytesRps27l        |
| ##### | -3.15561 | 0.046 | 0.524 | ##### | MonocytesColla2        |
| ##### | 1.041595 | 0.875 | 0.67  | ##### | MonocytesCox6b1        |
| ##### | 1.025573 | 0.901 | 0.678 | ##### | MonocytesCox7c         |
| ##### | -3.7933  | 0.089 | 0.547 | ##### | MonocytesSparc         |
| ##### | -3.08684 | 0.027 | 0.51  | ##### | MonocytesColla1        |
| ##### | 1.31348  | 0.682 | 0.361 | ##### | MonocytesTmem256       |
| ##### | -3.2345  | 0.082 | 0.541 | ##### | MonocytesLum           |
| ##### | 1.147086 | 0.751 | 0.449 | ##### | MonocytesPitpna        |
| ##### | 1.017523 | 0.721 | 0.341 | ##### | MonocytesEfhd2         |
| ##### | -3.13286 | 0.039 | 0.51  | ##### | MonocytesSerp1nh1      |
| ##### | -2.83615 | 0.062 | 0.522 | ##### | MonocytesPcolce        |
| ##### | -1.35699 | 0.847 | 0.943 | ##### | MonocytesJund          |
| ##### | -2.41179 | 0.034 | 0.504 | ##### | MonocytesMmp2          |
| ##### | 1.007965 | 0.802 | 0.464 | ##### | MonocytesVamp8         |
| ##### | -3.4499  | 0.085 | 0.533 | ##### | MonocytesClec3b        |
| ##### | -2.08451 | 0.164 | 0.622 | ##### | MonocytesCd9           |
| ##### | 1.257131 | 0.637 | 0.271 | ##### | MonocytesPrkcd         |
| ##### | 1.220309 | 0.753 | 0.455 | ##### | MonocytesUsmg5         |
| ##### | -3.47033 | 0.129 | 0.552 | ##### | MonocytesHtra3         |
| ##### | 1.075263 | 0.855 | 0.611 | ##### | MonocytesH2afj         |
| ##### | -2.02266 | 0.05  | 0.508 | ##### | MonocytesLhfp          |
| ##### | -3.85392 | 0.211 | 0.588 | ##### | MonocytesIgfbp7        |
| ##### | -2.43177 | 0.052 | 0.507 | ##### | MonocytesCd34          |
| ##### | -3.33367 | 0.075 | 0.522 | ##### | MonocytesCol3a1        |

|       |          |       |       |       |                   |
|-------|----------|-------|-------|-------|-------------------|
| ##### | -2.48737 | 0.043 | 0.497 | ##### | MonocytesCol6a1   |
| ##### | -4.89508 | 0.362 | 0.655 | ##### | MonocytesDcn      |
| ##### | -2.94568 | 0.052 | 0.503 | ##### | MonocytesFbln1    |
| ##### | -2.2456  | 0.036 | 0.487 | ##### | MonocytesFstl1    |
| ##### | -2.12144 | 0.046 | 0.493 | ##### | MonocytesDpt      |
| ##### | -1.16822 | 0.448 | 0.757 | ##### | MonocytesAes      |
| ##### | -2.12577 | 0.029 | 0.479 | ##### | MonocytesNid1     |
| ##### | -1.63778 | 0.019 | 0.47  | ##### | MonocytesCamk2n1  |
| ##### | 1.054347 | 0.902 | 0.786 | ##### | MonocytesPkm      |
| ##### | -2.44935 | 0.04  | 0.484 | ##### | MonocytesCcnc80   |
| ##### | -2.36386 | 0.039 | 0.485 | ##### | MonocytesFbln2    |
| ##### | -2.36256 | 0.041 | 0.485 | ##### | MonocytesCol6a2   |
| ##### | -2.56354 | 0.033 | 0.48  | ##### | MonocytesSmoc2    |
| ##### | -1.71013 | 0.018 | 0.467 | ##### | MonocytesNfib     |
| ##### | 1.076218 | 0.812 | 0.555 | ##### | MonocytesUqcrq    |
| ##### | -1.60287 | 0.036 | 0.482 | ##### | MonocytesNedd4    |
| ##### | -3.20378 | 0.392 | 0.667 | ##### | MonocytesCebpd    |
| ##### | 1.089161 | 0.848 | 0.595 | ##### | MonocytesNdufa2   |
| ##### | -2.11661 | 0.149 | 0.567 | ##### | MonocytesCd81     |
| ##### | -2.46939 | 0.163 | 0.557 | ##### | MonocytesIgfbp4   |
| ##### | -1.76249 | 0.031 | 0.476 | ##### | MonocytesSdc2     |
| ##### | -2.17793 | 0.088 | 0.521 | ##### | MonocytesRarres2  |
| ##### | -1.74474 | 0.027 | 0.469 | ##### | MonocytesMxra8    |
| ##### | -2.35329 | 0.032 | 0.475 | ##### | MonocytesCol15a1  |
| ##### | 1.681327 | 0.361 | 0.111 | ##### | MonocytesDab2     |
| ##### | -1.85392 | 0.093 | 0.514 | ##### | MonocytesSelenom  |
| ##### | 1.008902 | 0.736 | 0.441 | ##### | MonocytesBrk1     |
| ##### | 1.149511 | 0.67  | 0.364 | ##### | MonocytesAtplal   |
| ##### | -2.32883 | 0.066 | 0.492 | ##### | MonocytesSerpinfl |
| ##### | -1.79372 | 0.032 | 0.471 | ##### | MonocytesSlc43a3  |
| ##### | -1.8485  | 0.237 | 0.617 | ##### | MonocytesCd63     |
| ##### | -2.76925 | 0.109 | 0.522 | ##### | MonocytesGpx3     |
| ##### | 1.435375 | 0.704 | 0.412 | ##### | MonocytesPgk1     |
| ##### | 1.067862 | 0.804 | 0.568 | ##### | MonocytesArpc4    |
| ##### | -1.81954 | 0.032 | 0.467 | ##### | MonocytesLoxl1    |
| ##### | -1.77994 | 0.054 | 0.486 | ##### | MonocytesLamc1    |
| ##### | -1.77703 | 0.027 | 0.463 | ##### | MonocytesPrelp    |
| ##### | 1.007415 | 0.82  | 0.619 | ##### | MonocytesEif3k    |
| ##### | -1.88674 | 0.038 | 0.471 | ##### | MonocytesHspg2    |
| ##### | -3.24703 | 0.081 | 0.498 | ##### | MonocytesLpl      |
| ##### | -1.57966 | 0.03  | 0.459 | ##### | MonocytesRhoj     |
| ##### | -1.77027 | 0.016 | 0.444 | ##### | MonocytesEbf1     |
| ##### | -1.94145 | 0.034 | 0.46  | ##### | MonocytesCol4a1   |
| ##### | -1.82622 | 0.027 | 0.453 | ##### | MonocytesPlpp3    |
| ##### | -2.08167 | 0.024 | 0.45  | ##### | MonocytesGas1     |
| ##### | 1.042398 | 0.812 | 0.572 | ##### | MonocytesCox6a1   |
| ##### | 2.433839 | 0.531 | 0.258 | ##### | MonocytesSdc4     |
| ##### | 1.039757 | 0.87  | 0.701 | ##### | MonocytesRpl31    |
| ##### | -1.68766 | 0.077 | 0.495 | ##### | MonocytesSerpnb6a |
| ##### | 1.260348 | 0.824 | 0.686 | ##### | MonocytesH2afz    |
| ##### | -1.20758 | 0.689 | 0.805 | ##### | MonocytesGnas     |
| ##### | -1.66871 | 0.028 | 0.452 | ##### | MonocytesGpm6b    |
| ##### | -1.8006  | 0.073 | 0.49  | ##### | MonocytesPmp22    |
| ##### | 1.138734 | 0.685 | 0.428 | ##### | MonocytesCtsa     |

|       |          |       |       |       |                  |
|-------|----------|-------|-------|-------|------------------|
| ##### | -1.78295 | 0.068 | 0.48  | ##### | MonocytesCrip2   |
| ##### | -1.81342 | 0.064 | 0.479 | ##### | MonocytesRbp1    |
| ##### | -1.83096 | 0.033 | 0.449 | ##### | MonocytesPcsk6   |
| ##### | 1.098216 | 0.997 | 0.992 | ##### | MonocytesActb    |
| ##### | -1.68891 | 0.019 | 0.434 | ##### | MonocytesSpry1   |
| ##### | -1.81282 | 0.077 | 0.477 | ##### | MonocytesNfix    |
| ##### | -1.43429 | 0.022 | 0.434 | ##### | MonocytesBicc1   |
| ##### | 1.137451 | 0.62  | 0.33  | ##### | MonocytesAp2s1   |
| ##### | -1.76203 | 0.027 | 0.439 | ##### | MonocytesLamb1   |
| ##### | -1.64753 | 0.05  | 0.464 | ##### | MonocytesAbca8a  |
| ##### | -1.78431 | 0.075 | 0.484 | ##### | MonocytesAxl     |
| ##### | -1.7159  | 0.013 | 0.422 | ##### | MonocytesIslr    |
| ##### | -1.47645 | 0.02  | 0.43  | ##### | MonocytesCavin3  |
| ##### | 1.047829 | 0.746 | 0.505 | ##### | MonocytesPomp    |
| ##### | -1.66094 | 0.05  | 0.459 | ##### | MonocytesTnxb    |
| ##### | -1.58083 | 0.024 | 0.432 | ##### | MonocytesTcf21   |
| ##### | -1.779   | 0.117 | 0.521 | ##### | MonocytesPmepa1  |
| ##### | -1.43365 | 0.062 | 0.472 | ##### | MonocytesRhoc    |
| ##### | -1.58753 | 0.036 | 0.441 | ##### | MonocytesOlfml3  |
| ##### | -1.54929 | 0.077 | 0.478 | ##### | MonocytesRcn3    |
| ##### | -1.41558 | 0.023 | 0.423 | ##### | MonocytesLama2   |
| ##### | -2.4973  | 0.042 | 0.44  | ##### | MonocytesMfap5   |
| ##### | -1.32012 | 0.037 | 0.442 | ##### | MonocytesFxyd1   |
| ##### | -1.4592  | 0.026 | 0.429 | ##### | MonocytesPtgis   |
| ##### | -1.19955 | 0.156 | 0.556 | ##### | MonocytesIfi27   |
| ##### | -1.25354 | 0.617 | 0.858 | ##### | MonocytesBtg2    |
| ##### | -2.51754 | 0.295 | 0.595 | ##### | MonocytesPil6    |
| ##### | -1.48119 | 0.022 | 0.415 | ##### | MonocytesRamp2   |
| ##### | -1.37612 | 0.025 | 0.419 | ##### | MonocytesItm2a   |
| ##### | 1.156677 | 0.489 | 0.218 | ##### | MonocytesCndp2   |
| ##### | -1.25947 | 0.017 | 0.41  | ##### | MonocytesPdgfra  |
| ##### | 1.211401 | 0.679 | 0.412 | ##### | MonocytesGrn     |
| ##### | -1.34712 | 0.036 | 0.426 | ##### | MonocytesDdah2   |
| ##### | 1.016811 | 0.675 | 0.378 | ##### | MonocytesTgfb1   |
| ##### | -1.73245 | 0.03  | 0.419 | ##### | MonocytesOgn     |
| ##### | -1.33183 | 0.023 | 0.41  | ##### | MonocytesCol5a1  |
| ##### | -1.4602  | 0.067 | 0.447 | ##### | MonocytesCpq     |
| ##### | -1.38755 | 0.039 | 0.428 | ##### | MonocytesPlxdc2  |
| ##### | -1.22792 | 0.018 | 0.404 | ##### | MonocytesCald1   |
| ##### | -1.27644 | 0.02  | 0.407 | ##### | MonocytesEntpd2  |
| ##### | -1.26908 | 0.023 | 0.409 | ##### | MonocytesFhl1    |
| ##### | -2.52197 | 0.24  | 0.56  | ##### | MonocytesEgr1    |
| ##### | 1.01621  | 0.541 | 0.267 | ##### | MonocytesMrpl54  |
| ##### | -3.83294 | 0.307 | 0.581 | ##### | MonocytesMgp     |
| ##### | -1.13635 | 0.012 | 0.392 | ##### | MonocytesFermt2  |
| ##### | -1.29721 | 0.02  | 0.403 | ##### | MonocytesAdamts2 |
| ##### | -1.17608 | 0.031 | 0.415 | ##### | MonocytesS100a16 |
| ##### | -1.25308 | 0.03  | 0.41  | ##### | MonocytesNfia    |
| ##### | -1.13153 | 0.028 | 0.409 | ##### | MonocytesFkbp9   |
| ##### | -2.28734 | 0.024 | 0.401 | ##### | MonocytesMeg3    |
| ##### | -1.52064 | 0.019 | 0.398 | ##### | MonocytesAdamts5 |
| ##### | -1.33178 | 0.02  | 0.399 | ##### | MonocytesFbln5   |
| ##### | -1.25587 | 0.019 | 0.399 | ##### | MonocytesCol5a2  |
| ##### | 1.110037 | 0.694 | 0.441 | ##### | MonocytesAtp5k   |

|          |          |       |       |          |                   |
|----------|----------|-------|-------|----------|-------------------|
| #####    | -2.37515 | 0.1   | 0.468 | #####    | MonocytesLy6a     |
| #####    | -2.07701 | 0.14  | 0.495 | #####    | MonocytesCfh      |
| #####    | -1.15118 | 0.025 | 0.403 | #####    | MonocytesRora     |
| #####    | 1.01302  | 0.752 | 0.5   | #####    | MonocytesUqcr11   |
| #####    | -1.47109 | 0.014 | 0.386 | #####    | MonocytesCol6a3   |
| #####    | -1.29545 | 0.54  | 0.819 | #####    | MonocytesKlf2     |
| #####    | -4.42553 | 0.751 | 0.772 | #####    | MonocytesGsn      |
| #####    | -1.52302 | 0.137 | 0.501 | #####    | MonocytesKlf9     |
| #####    | -2.06522 | 0.141 | 0.529 | #####    | MonocytesG0s2     |
| #####    | 1.160671 | 0.503 | 0.241 | #####    | MonocytesSyngr2   |
| #####    | -1.21409 | 0.013 | 0.38  | #####    | MonocytesMedag    |
| #####    | 1.265385 | 0.637 | 0.385 | #####    | MonocytesSys1     |
| #####    | -1.123   | 0.02  | 0.388 | #####    | MonocytesMxra7    |
| #####    | -1.16227 | 0.116 | 0.495 | #####    | MonocytesSntb2    |
| #####    | 1.083727 | 0.698 | 0.451 | #####    | MonocytesSrp9     |
| #####    | -1.32101 | 0.022 | 0.384 | #####    | MonocytesFbn1     |
| #####    | -1.59886 | 0.024 | 0.387 | #####    | MonocytesCol8a1   |
| #####    | -1.24072 | 0.025 | 0.387 | #####    | MonocytesSod3     |
| #####    | -1.11021 | 0.016 | 0.376 | #####    | MonocytesLama4    |
| #####    | -1.39021 | 0.055 | 0.415 | #####    | MonocytesOaf      |
| #####    | -1.01203 | 0.015 | 0.372 | #####    | MonocytesP3h3     |
| #####    | -1.47937 | 0.023 | 0.376 | 6.04E-99 | MonocytesPcolce2  |
| #####    | -1.12295 | 0.011 | 0.365 | 9.78E-99 | MonocytesAebp1    |
| #####    | -1.45557 | 0.232 | 0.542 | 4.29E-98 | MonocytesSptbn1   |
| #####    | -1.11627 | 0.051 | 0.409 | 1.67E-97 | MonocytesPkd2     |
| #####    | -1.32969 | 0.054 | 0.411 | 1.34E-96 | MonocytesPam      |
| #####    | -1.04798 | 0.006 | 0.354 | 1.99E-96 | MonocytesVwa1     |
| #####    | -1.05676 | 0.011 | 0.357 | 2.78E-96 | MonocytesDpys13   |
| #####    | -2.13978 | 0.053 | 0.403 | 3.76E-96 | MonocytesDpep1    |
| #####    | 2.344463 | 0.276 | 0.081 | 6.17E-96 | MonocytesCcl7     |
| #####    | -1.09368 | 0.142 | 0.5   | 1.06E-95 | MonocytesTubb4b   |
| 1.71E-98 | -1.09703 | 0.385 | 0.724 | 3.07E-94 | MonocytesYpel3    |
| 3.24E-98 | -1.56939 | 0.009 | 0.35  | 5.84E-94 | MonocytesSpon2    |
| 4.54E-98 | 1.122279 | 0.452 | 0.196 | 8.17E-94 | MonocytesIl4ra    |
| 1.89E-97 | -1.5537  | 0.015 | 0.355 | 3.41E-93 | MonocytesAspn     |
| 2.54E-97 | -1.52228 | 0.031 | 0.379 | 4.57E-93 | MonocytesTimp3    |
| 7.44E-97 | -1.21843 | 0.013 | 0.351 | 1.34E-92 | MonocytesHtra1    |
| 9.89E-97 | -1.42278 | 0.041 | 0.387 | 1.78E-92 | MonocytesGem      |
| 4.42E-96 | -1.07201 | 0.876 | 0.936 | 7.95E-92 | MonocytesJunb     |
| 6.14E-96 | 1.029133 | 0.675 | 0.453 | 1.11E-91 | MonocytesRnh1     |
| 3.34E-95 | 1.095395 | 0.658 | 0.419 | 6.02E-91 | MonocytesNme1     |
| 1.29E-94 | -1.21019 | 0.027 | 0.366 | 2.32E-90 | MonocytesSerpine2 |
| 1.32E-94 | 1.024845 | 0.392 | 0.15  | 2.38E-90 | MonocytesTmem176b |
| 1.25E-93 | 1.10689  | 0.484 | 0.226 | 2.25E-89 | MonocytesHif1a    |
| 5.64E-93 | -1.09164 | 0.086 | 0.425 | 1.02E-88 | MonocytesSlc29a1  |
| 6.74E-93 | -1.32991 | 0.015 | 0.345 | 1.21E-88 | MonocytesGfpt2    |
| 1.50E-90 | -1.03088 | 0.048 | 0.389 | 2.71E-86 | MonocytesSocs2    |
| 3.04E-90 | -1.02305 | 0.017 | 0.341 | 5.47E-86 | MonocytesCol4a2   |
| 3.15E-90 | 1.027462 | 0.488 | 0.25  | 5.67E-86 | MonocytesAp2a2    |
| 3.38E-90 | -1.0389  | 0.07  | 0.406 | 6.08E-86 | MonocytesSelenon  |
| 6.25E-90 | -2.60979 | 0.098 | 0.429 | 1.12E-85 | MonocytesHspb1    |
| 8.74E-90 | -1.40073 | 0.015 | 0.336 | 1.57E-85 | MonocytesNbl1     |
| 8.74E-90 | -1.16315 | 0.601 | 0.846 | 1.57E-85 | MonocytesMap1lc3b |
| 2.13E-89 | -1.27233 | 0.018 | 0.34  | 3.84E-85 | MonocytesEln      |

|          |          |       |       |          |                        |
|----------|----------|-------|-------|----------|------------------------|
| 3.35E-89 | -1.08235 | 0.037 | 0.363 | 6.03E-85 | MonocytesAngptl2       |
| 8.11E-89 | -1.15953 | 0.041 | 0.367 | 1.46E-84 | MonocytesPpplr14a      |
| 1.39E-88 | 1.05963  | 0.68  | 0.43  | 2.50E-84 | MonocytesBC005537      |
| 2.98E-88 | -1.11498 | 0.114 | 0.44  | 5.36E-84 | MonocytesNfic          |
| 4.63E-88 | -1.0707  | 0.032 | 0.357 | 8.34E-84 | MonocytesTm4sf1        |
| 5.33E-88 | -1.56883 | 0.236 | 0.54  | 9.60E-84 | MonocytesFosb          |
| 6.58E-88 | -1.12871 | 0.012 | 0.327 | 1.18E-83 | MonocytesCol5a3        |
| 6.65E-87 | -1.2239  | 0.014 | 0.328 | 1.20E-82 | MonocytesGsta3         |
| 3.09E-86 | -1.09232 | 0.013 | 0.323 | 5.56E-82 | MonocytesSfrp1         |
| 3.57E-86 | -1.24524 | 0.197 | 0.505 | 6.42E-82 | MonocytesRnase4        |
| 5.66E-86 | -1.11892 | 0.157 | 0.492 | 1.02E-81 | MonocytesDhrs7         |
| 5.95E-86 | -1.12667 | 0.029 | 0.341 | 1.07E-81 | MonocytesPlala         |
| 4.83E-85 | 1.168524 | 0.706 | 0.401 | 8.69E-81 | MonocytesApoE          |
| 2.34E-84 | -2.33409 | 0.06  | 0.371 | 4.21E-80 | MonocytesGm12840       |
| 2.55E-84 | -1.67153 | 0.125 | 0.429 | 4.60E-80 | MonocytesCkb           |
| 7.03E-83 | -1.06195 | 0.584 | 0.765 | 1.27E-78 | MonocytesDnaj1         |
| 1.28E-82 | -1.06609 | 0.077 | 0.387 | 2.31E-78 | MonocytesEmilin1       |
| 3.38E-82 | 1.065273 | 0.496 | 0.27  | 6.08E-78 | MonocytesSnx2          |
| 9.30E-82 | -2.09341 | 0.026 | 0.327 | 1.67E-77 | MonocytesCyr61         |
| 5.69E-80 | -1.101   | 0.011 | 0.303 | 1.02E-75 | MonocytesAdamts1       |
| 5.01E-78 | 2.42122  | 0.459 | 0.258 | 9.02E-74 | MonocytesTgm2          |
| 1.15E-77 | -1.30385 | 0.077 | 0.376 | 2.08E-73 | MonocytesHsd11b1       |
| 2.49E-77 | -1.60273 | 0.29  | 0.52  | 4.48E-73 | MonocytesGstm1         |
| 7.88E-77 | -1.20777 | 0.356 | 0.576 | 1.42E-72 | MonocytesCyb5a         |
| 8.26E-74 | -1.30893 | 0.005 | 0.279 | 1.49E-69 | MonocytesAckr3         |
| 4.27E-72 | -1.0962  | 0.253 | 0.499 | 7.69E-68 | MonocytesNenf          |
| 1.01E-71 | -1.0236  | 0.208 | 0.489 | 1.81E-67 | MonocytesTcf4          |
| 2.38E-71 | -1.48066 | 0.041 | 0.318 | 4.29E-67 | MonocytesEts1          |
| 2.47E-71 | -1.2658  | 0.349 | 0.547 | 4.45E-67 | MonocytesMtch1         |
| 1.74E-70 | -1.92896 | 0.066 | 0.35  | 3.14E-66 | MonocytesCxcl1         |
| 3.33E-69 | -1.20317 | 0.113 | 0.395 | 5.99E-65 | MonocytesAtf5          |
| 8.63E-68 | -1.00767 | 0.296 | 0.536 | 1.55E-63 | MonocytesYbx3          |
| 6.67E-65 | -1.51601 | 0.025 | 0.28  | 1.20E-60 | MonocytesCtgf          |
| 1.04E-63 | 1.903478 | 0.353 | 0.174 | 1.88E-59 | MonocytesTimp1         |
| 3.71E-63 | -1.01706 | 0.542 | 0.639 | 6.68E-59 | MonocytesAldh2         |
| 2.17E-62 | 1.249896 | 0.374 | 0.186 | 3.90E-58 | MonocytesId1           |
| 5.42E-62 | -1.54148 | 0.034 | 0.281 | 9.75E-58 | MonocytesCd3e          |
| 8.50E-62 | 1.370492 | 0.458 | 0.247 | 1.53E-57 | MonocytesHmox1         |
| 3.56E-59 | -1.01068 | 0.032 | 0.277 | 6.40E-55 | MonocytesThy1          |
| 8.46E-54 | -1.20635 | 0.1   | 0.339 | 1.52E-49 | MonocytesUgdh          |
| 1.63E-51 | -1.13738 | 0.231 | 0.452 | 2.94E-47 | MonocytesEcml          |
| 6.43E-50 | 1.024259 | 0.508 | 0.335 | 1.16E-45 | MonocytesCltc          |
| 1.64E-49 | 1.147709 | 0.585 | 0.427 | 2.95E-45 | MonocytesMif           |
| 2.06E-48 | -1.15973 | 0.138 | 0.368 | 3.72E-44 | MonocytesNudt4         |
| 1.32E-47 | -1.04323 | 0.25  | 0.48  | 2.38E-43 | MonocytesId3           |
| 4.17E-47 | -1.02908 | 0.157 | 0.379 | 7.50E-43 | MonocytesUap1          |
| 4.30E-41 | -1.21551 | 0.333 | 0.528 | 7.74E-37 | MonocytesDnajb1        |
| 1.03E-38 | -1.07103 | 0.182 | 0.386 | 1.86E-34 | Monocytes2810474019Rik |
| 3.22E-35 | -1.79571 | 0.192 | 0.358 | 5.80E-31 | MonocytesVps37b        |
| 6.89E-32 | -1.31549 | 0.392 | 0.571 | 1.24E-27 | MonocytesGrina         |
| 1.06E-30 | -1.22627 | 0.731 | 0.778 | 1.90E-26 | MonocytesFos           |
| 3.82E-28 | -2.50214 | 0.803 | 0.663 | 6.88E-24 | MonocytesHbb-bs        |
| 2.57E-26 | -1.05447 | 0.228 | 0.398 | 4.62E-22 | MonocytesThbs1         |
| 3.71E-22 | -3.05919 | 0.71  | 0.456 | 6.69E-18 | MonocytesS100a8        |



|          |          |       |       |          |                  |
|----------|----------|-------|-------|----------|------------------|
| 3.73E-22 | -1.63883 | 0.17  | 0.289 | 6.72E-18 | MonocytesPglyrp1 |
| 3.62E-21 | -2.34846 | 0.635 | 0.494 | 6.52E-17 | MonocytesHba-a1  |
| 6.38E-18 | -1.8646  | 0.275 | 0.365 | 1.15E-13 | MonocytesMxd1    |
| 1.05E-15 | -1.09694 | 0.204 | 0.29  | 1.89E-11 | MonocytesLtb     |
| 2.29E-15 | -1.19779 | 0.163 | 0.273 | 4.12E-11 | MonocytesIsg15   |
| 5.50E-13 | -1.22832 | 0.223 | 0.292 | 9.89E-09 | MonocytesSamsn1  |
| 2.62E-11 | -2.21301 | 0.191 | 0.253 | 4.72E-07 | MonocytesIl1r2   |
| 9.53E-11 | -1.49872 | 0.227 | 0.285 | 1.72E-06 | MonocytesLmnbl   |
| 0        | 5.269303 | 0.609 | 0.007 | 0        | ILC Gzma         |
| 0        | 3.96232  | 0.877 | 0.087 | 0        | ILC Ccl5         |
| 0        | 3.626446 | 0.717 | 0.201 | 0        | ILC Irf8         |
| 0        | 3.494566 | 0.901 | 0.088 | 0        | ILC Nkg7         |
| 0        | 3.341147 | 0.691 | 0.018 | 0        | ILC Prf1         |
| 0        | 3.120423 | 0.949 | 0.429 | 0        | ILC AW112010     |
| 0        | 3.093218 | 0.679 | 0.026 | 0        | ILC Serpinb6b    |
| 0        | 2.952265 | 0.842 | 0.066 | 0        | ILC Il12rb       |
| 0        | 2.812467 | 0.692 | 0.003 | 0        | ILC Ncr1         |
| 0        | 2.808587 | 0.404 | 0.007 | 0        | ILC Xcl1         |
| 0        | 2.751081 | 0.767 | 0.029 | 0        | ILC Klrd1        |
| 0        | 2.656328 | 0.653 | 0.117 | 0        | ILC Serpinb9     |
| 0        | 2.605837 | 0.745 | 0.156 | 0        | ILC Ugcg         |
| 0        | 2.488341 | 0.596 | 0.044 | 0        | ILC Ctla2a       |
| 0        | 2.448282 | 0.766 | 0.059 | 0        | ILC Ctsw         |
| 0        | 2.400014 | 0.547 | 0.025 | 0        | ILC Klrc1        |
| 0        | 2.3794   | 0.612 | 0.004 | 0        | ILC Klrel        |
| 0        | 2.354205 | 0.728 | 0.066 | 0        | ILC Txk          |
| 0        | 2.344169 | 0.494 | 0.039 | 0        | ILC Gzmb         |
| 0        | 2.302625 | 0.552 | 0.028 | 0        | ILC Cd7          |
| 0        | 2.244881 | 0.502 | 0.006 | 0        | ILC Eomes        |
| 0        | 2.212043 | 0.621 | 0.025 | 0        | ILC Klrk1        |
| 0        | 2.186182 | 0.669 | 0.146 | 0        | ILC Nr4a2        |
| 0        | 2.034063 | 0.647 | 0.079 | 0        | ILC Sh2d2a       |
| 0        | 1.972257 | 0.887 | 0.326 | 0        | ILC Vps37b       |
| 0        | 1.952595 | 0.801 | 0.165 | 0        | ILC 1-Sep        |
| 0        | 1.949782 | 0.655 | 0.109 | 0        | ILC Rgs1         |
| 0        | 1.948775 | 0.734 | 0.169 | 0        | ILC Dusp2        |
| 0        | 1.941944 | 0.354 | 0.003 | 0        | ILC Cma1         |
| 0        | 1.86647  | 0.845 | 0.368 | 0        | ILC Id2          |
| 0        | 1.813667 | 0.333 | 0.003 | 0        | ILC Trdc         |
| 0        | 1.805311 | 0.768 | 0.139 | 0        | ILC Ms4a4b       |
| 0        | 1.797648 | 0.286 | 0.002 | 0        | ILC Klra3        |
| 0        | 1.785731 | 0.995 | 0.759 | 0        | ILC Tmsb10       |
| 0        | 1.78077  | 0.657 | 0.097 | 0        | ILC Dok2         |
| 0        | 1.730154 | 0.432 | 0.002 | 0        | ILC Klrb1c       |
| 0        | 1.697908 | 0.739 | 0.088 | 0        | ILC Trbc1        |
| 0        | 1.69773  | 0.715 | 0.12  | 0        | ILC Lck          |
| 0        | 1.695521 | 0.466 | 0.068 | 0        | ILC Stmn1        |
| 0        | 1.675737 | 0.697 | 0.127 | 0        | ILC Ptprecap     |
| 0        | 1.644014 | 0.53  | 0.062 | 0        | ILC Gimap5       |
| 0        | 1.604139 | 0.449 | 0.029 | 0        | ILC Fas1         |
| 0        | 1.528502 | 0.487 | 0.066 | 0        | ILC Runx3        |
| 0        | 1.520184 | 0.399 | 0.019 | 0        | ILC Klrc2        |
| 0        | 1.508413 | 0.811 | 0.282 | 0        | ILC Ets1         |
| 0        | 1.504929 | 0.425 | 0.025 | 0        | ILC Tbx21        |

|       |          |       |       |       |     |          |
|-------|----------|-------|-------|-------|-----|----------|
| 0     | 1.482465 | 0.605 | 0.123 | 0     | ILC | Ptpn22   |
| 0     | 1.448031 | 0.69  | 0.19  | 0     | ILC | Dusp5    |
| 0     | 1.434245 | 0.81  | 0.25  | 0     | ILC | Ptpn18   |
| 0     | 1.410177 | 0.41  | 0.042 | 0     | ILC | Atp1b1   |
| 0     | 1.388321 | 0.532 | 0.098 | 0     | ILC | Gimap4   |
| 0     | 1.346825 | 0.355 | 0.015 | 0     | ILC | Syt13    |
| 0     | 1.341785 | 0.597 | 0.121 | 0     | ILC | Gimap1   |
| 0     | 1.34118  | 0.562 | 0.103 | 0     | ILC | Skap1    |
| 0     | 1.333893 | 0.27  | 0.007 | 0     | ILC | Klrg1    |
| 0     | 1.328987 | 0.584 | 0.129 | 0     | ILC | B4galnt1 |
| 0     | 1.270882 | 0.439 | 0.064 | 0     | ILC | Stat4    |
| 0     | 1.223855 | 0.322 | 0.004 | 0     | ILC | Klrb1f   |
| 0     | 1.192622 | 0.385 | 0.056 | 0     | ILC | Lamb3    |
| 0     | 1.190121 | 0.428 | 0.07  | 0     | ILC | Tnfrsf18 |
| 0     | 1.168428 | 0.351 | 0.034 | 0     | ILC | Il18r1   |
| 0     | 1.145367 | 0.332 | 0.041 | 0     | ILC | Ccr5     |
| 0     | 1.131997 | 0.396 | 0.056 | 0     | ILC | Prkch    |
| 0     | 1.119903 | 0.358 | 0.051 | 0     | ILC | Spn      |
| 0     | -3.21259 | 0.098 | 0.788 | 0     | ILC | Ifitm2   |
| ##### | -3.62043 | 0.075 | 0.739 | ##### | ILC | Ifitm3   |
| ##### | 1.436621 | 0.924 | 0.374 | ##### | ILC | Selplg   |
| ##### | 1.994025 | 0.909 | 0.634 | ##### | ILC | Ifngr1   |
| ##### | 1.10829  | 0.422 | 0.073 | ##### | ILC | Cd48     |
| ##### | 1.287188 | 0.498 | 0.102 | ##### | ILC | Il2rg    |
| ##### | 1.203618 | 0.459 | 0.087 | ##### | ILC | Gimap9   |
| ##### | -2.98629 | 0.515 | 0.86  | ##### | ILC | Cst3     |
| ##### | 1.770378 | 0.937 | 0.681 | ##### | ILC | H2afz    |
| ##### | 1.825491 | 0.677 | 0.237 | ##### | ILC | Bcl2     |
| ##### | 1.870901 | 0.646 | 0.228 | ##### | ILC | Pik3r1   |
| ##### | 1.750083 | 0.935 | 0.62  | ##### | ILC | Zfp3612  |
| ##### | 1.318014 | 0.593 | 0.158 | ##### | ILC | Bin2     |
| ##### | 1.394468 | 0.907 | 0.389 | ##### | ILC | Ptpnc    |
| ##### | 1.126527 | 0.994 | 0.784 | ##### | ILC | Ppia     |
| ##### | 1.031551 | 0.995 | 0.848 | ##### | ILC | Rps11    |
| ##### | 1.181318 | 0.565 | 0.137 | ##### | ILC | Cd2      |
| ##### | 1.329291 | 0.972 | 0.711 | ##### | ILC | H2-K1    |
| ##### | -4.35979 | 0.081 | 0.681 | ##### | ILC | Cebpd    |
| ##### | 1.261142 | 0.49  | 0.112 | ##### | ILC | Gimap3   |
| ##### | 1.200359 | 0.564 | 0.144 | ##### | ILC | Gimap6   |
| ##### | 1.027393 | 0.399 | 0.073 | ##### | ILC | Ccr2     |
| ##### | 1.172155 | 0.893 | 0.385 | ##### | ILC | Laptm5   |
| ##### | -5.7309  | 0.403 | 0.788 | ##### | ILC | Gsn      |
| ##### | 1.16105  | 0.792 | 0.29  | ##### | ILC | Hest     |
| ##### | 1.079003 | 0.376 | 0.072 | ##### | ILC | Il18rap  |
| ##### | -2.36264 | 0.083 | 0.66  | ##### | ILC | Aldh2    |
| ##### | 1.084993 | 0.378 | 0.074 | ##### | ILC | Slpr4    |
| ##### | 1.131775 | 0.515 | 0.133 | ##### | ILC | Itgb7    |
| ##### | -2.89365 | 0.057 | 0.626 | ##### | ILC | Cd63     |
| ##### | -1.88241 | 0.495 | 0.882 | ##### | ILC | S100a6   |
| ##### | 1.093179 | 0.467 | 0.115 | ##### | ILC | Tm6sf1   |
| ##### | 1.08158  | 0.964 | 0.44  | ##### | ILC | Rac2     |
| ##### | 1.025743 | 0.592 | 0.176 | ##### | ILC | Satb1    |
| ##### | 1.078034 | 0.965 | 0.785 | ##### | ILC | Rpl27    |
| ##### | -3.21732 | 0.053 | 0.607 | ##### | ILC | Pi16     |

|       |          |       |       |       |     |          |
|-------|----------|-------|-------|-------|-----|----------|
| ##### | -2.93204 | 0.06  | 0.6   | ##### | ILC | Cts1     |
| ##### | -2.1735  | 0.175 | 0.666 | ##### | ILC | Timp2    |
| ##### | 1.233435 | 0.483 | 0.147 | ##### | ILC | Ev1      |
| ##### | 1.017314 | 0.407 | 0.093 | ##### | ILC | P2ry10   |
| ##### | 1.380732 | 0.71  | 0.276 | ##### | ILC | Neurl3   |
| ##### | 1.156248 | 0.473 | 0.125 | ##### | ILC | Ccl4     |
| ##### | 1.038951 | 0.993 | 0.926 | ##### | ILC | Pfn1     |
| ##### | 1.105233 | 0.515 | 0.155 | ##### | ILC | Prex1    |
| ##### | -2.74377 | 0.024 | 0.567 | ##### | ILC | Crispld2 |
| ##### | 1.132476 | 0.708 | 0.269 | ##### | ILC | Arhgap45 |
| ##### | -1.90278 | 0.02  | 0.564 | ##### | ILC | App      |
| ##### | 1.185418 | 0.862 | 0.58  | ##### | ILC | Sub1     |
| ##### | 1.128083 | 0.941 | 0.656 | ##### | ILC | S100a10  |
| ##### | -2.08959 | 0.02  | 0.567 | ##### | ILC | Mgst1    |
| ##### | -1.33399 | 0.994 | 0.996 | ##### | ILC | Fth1     |
| ##### | 1.166288 | 0.694 | 0.262 | ##### | ILC | Itgb2    |
| ##### | -4.27849 | 0.113 | 0.593 | ##### | ILC | Igfbp7   |
| ##### | 1.147688 | 0.924 | 0.663 | ##### | ILC | Tagln2   |
| ##### | 1.208911 | 0.814 | 0.506 | ##### | ILC | Mbnl1    |
| ##### | 1.60591  | 0.497 | 0.175 | ##### | ILC | Spry2    |
| ##### | -1.89558 | 0.016 | 0.539 | ##### | ILC | Marcks   |
| ##### | -3.45103 | 0.027 | 0.537 | ##### | ILC | Serping1 |
| ##### | -2.63245 | 0.094 | 0.602 | ##### | ILC | Ifi2712a |
| ##### | -2.76754 | 0.065 | 0.562 | ##### | ILC | Igfbp4   |
| ##### | -3.82999 | 0.061 | 0.555 | ##### | ILC | Htra3    |
| ##### | -3.70862 | 0.061 | 0.554 | ##### | ILC | Sparcl1  |
| ##### | 1.053622 | 0.715 | 0.269 | ##### | ILC | Samsn1   |
| ##### | 1.049969 | 0.381 | 0.092 | ##### | ILC | Itga4    |
| ##### | -5.64687 | 0.265 | 0.659 | ##### | ILC | Dcn      |
| ##### | -4.67134 | 0.122 | 0.589 | ##### | ILC | Mgp      |
| ##### | -3.02299 | 0.02  | 0.525 | ##### | ILC | Pcolce   |
| ##### | 1.42409  | 0.521 | 0.189 | ##### | ILC | Crem     |
| ##### | -3.95446 | 0.066 | 0.549 | ##### | ILC | Sparc    |
| ##### | -4.03844 | 0.093 | 0.563 | ##### | ILC | Bgn      |
| ##### | -3.45425 | 0.057 | 0.542 | ##### | ILC | Lum      |
| ##### | -1.7154  | 0.09  | 0.598 | ##### | ILC | Ly6e     |
| ##### | -2.7814  | 0.027 | 0.524 | ##### | ILC | Cygb     |
| ##### | -3.04924 | 0.027 | 0.534 | ##### | ILC | G0s2     |
| ##### | -2.48969 | 0.028 | 0.524 | ##### | ILC | Rarres2  |
| ##### | -2.9767  | 0.049 | 0.535 | ##### | ILC | Ltbp4    |
| ##### | -2.53075 | 0.095 | 0.569 | ##### | ILC | Cd81     |
| ##### | -3.63578 | 0.051 | 0.535 | ##### | ILC | Clec3b   |
| ##### | -2.06233 | 0.021 | 0.518 | ##### | ILC | Selenom  |
| ##### | -3.26679 | 0.038 | 0.525 | ##### | ILC | Colla2   |
| ##### | -3.12573 | 0.042 | 0.525 | ##### | ILC | Gpx3     |
| ##### | 1.08026  | 0.59  | 0.219 | ##### | ILC | Tnfaip3  |
| ##### | -2.5555  | 0.021 | 0.508 | ##### | ILC | Cd34     |
| ##### | -2.11449 | 0.208 | 0.624 | ##### | ILC | Anxa5    |
| ##### | -2.04128 | 0.022 | 0.507 | ##### | ILC | Lrp1     |
| ##### | 1.325994 | 0.581 | 0.258 | ##### | ILC | Vgl14    |
| ##### | -3.1202  | 0.034 | 0.511 | ##### | ILC | Serpinh1 |
| ##### | 1.260763 | 0.654 | 0.327 | ##### | ILC | Stk24    |
| ##### | -2.10503 | 0.028 | 0.509 | ##### | ILC | Lhfp     |
| ##### | -2.51315 | 0.022 | 0.501 | ##### | ILC | Cfh      |

|       |          |       |       |       |     |          |
|-------|----------|-------|-------|-------|-----|----------|
| ##### | -2.58698 | 0.021 | 0.498 | ##### | ILC | Col6a1   |
| ##### | -2.43064 | 0.03  | 0.504 | ##### | ILC | Mmp2     |
| ##### | -3.07128 | 0.04  | 0.51  | ##### | ILC | Colla1   |
| ##### | -3.06558 | 0.031 | 0.505 | ##### | ILC | Fbln1    |
| ##### | -2.08673 | 0.014 | 0.493 | ##### | ILC | Pmp22    |
| ##### | -1.84577 | 0.033 | 0.513 | ##### | ILC | Rnase4   |
| ##### | -2.2259  | 0.021 | 0.495 | ##### | ILC | Dpt      |
| ##### | -2.47972 | 0.014 | 0.487 | ##### | ILC | Col6a2   |
| ##### | -1.75404 | 0.016 | 0.491 | ##### | ILC | Cd302    |
| ##### | -3.56005 | 0.035 | 0.501 | ##### | ILC | Lpl      |
| ##### | -2.42345 | 0.029 | 0.494 | ##### | ILC | Serpinf1 |
| ##### | -2.44629 | 0.02  | 0.486 | ##### | ILC | Fbln2    |
| ##### | -1.83981 | 0.01  | 0.477 | ##### | ILC | Sdc2     |
| ##### | -1.97674 | 0.014 | 0.48  | ##### | ILC | Nfix     |
| ##### | -2.27918 | 0.025 | 0.488 | ##### | ILC | Fstl1    |
| ##### | -1.72183 | 0.048 | 0.509 | ##### | ILC | Nenf     |
| ##### | -2.02606 | 0.019 | 0.481 | ##### | ILC | Rbp1     |
| ##### | -3.43804 | 0.081 | 0.522 | ##### | ILC | Col3a1   |
| ##### | -2.4592  | 0.029 | 0.485 | ##### | ILC | Ccdc80   |
| ##### | -3.94696 | 0.124 | 0.558 | ##### | ILC | Mt1      |
| ##### | 1.224175 | 0.541 | 0.228 | ##### | ILC | Pdcd4    |
| ##### | -1.73591 | 0.011 | 0.468 | ##### | ILC | Nfib     |
| ##### | -1.98188 | 0.032 | 0.486 | ##### | ILC | Axl      |
| ##### | -1.36414 | 0.138 | 0.601 | ##### | ILC | Lamp2    |
| ##### | -2.43748 | 0.024 | 0.475 | ##### | ILC | Coll5a1  |
| ##### | -1.86385 | 0.017 | 0.472 | ##### | ILC | Slc43a3  |
| ##### | -2.00904 | 0.019 | 0.472 | ##### | ILC | Hspg2    |
| ##### | -2.57832 | 0.029 | 0.48  | ##### | ILC | Smoc2    |
| ##### | -1.85982 | 0.035 | 0.487 | ##### | ILC | Lamc1    |
| ##### | -2.1267  | 0.03  | 0.479 | ##### | ILC | Nid1     |
| ##### | -1.45054 | 0.062 | 0.519 | ##### | ILC | Myadm    |
| ##### | -1.88611 | 0.016 | 0.468 | ##### | ILC | Loxl1    |
| ##### | -1.44804 | 0.009 | 0.463 | ##### | ILC | Fcgrt    |
| ##### | -1.87737 | 0.013 | 0.464 | ##### | ILC | Prelp    |
| ##### | -1.6575  | 0.01  | 0.46  | ##### | ILC | Rhoj     |
| ##### | 1.231425 | 0.797 | 0.579 | ##### | ILC | Jak1     |
| ##### | -1.696   | 0.031 | 0.48  | ##### | ILC | Rcn3     |
| ##### | -1.89014 | 0.007 | 0.455 | ##### | ILC | Plpp3    |
| ##### | 1.011489 | 0.851 | 0.684 | ##### | ILC | Shisa5   |
| ##### | -1.77676 | 0.02  | 0.465 | ##### | ILC | Abca8a   |
| ##### | -2.3173  | 0.047 | 0.49  | ##### | ILC | Id3      |
| ##### | -1.98905 | 0.016 | 0.461 | ##### | ILC | Col4a1   |
| ##### | -1.74368 | 0.01  | 0.453 | ##### | ILC | Gpm6b    |
| ##### | -1.70438 | 0.027 | 0.469 | ##### | ILC | Mxra8    |
| ##### | -1.81123 | 0.018 | 0.461 | ##### | ILC | Tnxb     |
| ##### | -1.93294 | 0.011 | 0.45  | ##### | ILC | Pcsk6    |
| ##### | -1.77726 | 0.005 | 0.445 | ##### | ILC | Ebf1     |
| ##### | -1.35338 | 0.092 | 0.539 | ##### | ILC | Dstn     |
| ##### | -1.57401 | 0.014 | 0.449 | ##### | ILC | Cpq      |
| ##### | -1.83264 | 0.045 | 0.481 | ##### | ILC | Crip2    |
| ##### | -1.43563 | 0.009 | 0.444 | ##### | ILC | Fxyd1    |
| ##### | 1.226035 | 0.604 | 0.302 | ##### | ILC | Ccnd2    |
| ##### | -2.08298 | 0.018 | 0.45  | ##### | ILC | Gas1     |
| ##### | -2.34488 | 0.038 | 0.471 | ##### | ILC | Ly6a     |

|       |          |       |       |       |     |           |
|-------|----------|-------|-------|-------|-----|-----------|
| ##### | -1.90108 | 0.029 | 0.462 | ##### | ILC | Ecml      |
| ##### | -1.80414 | 0.014 | 0.44  | ##### | ILC | Lamb1     |
| ##### | -1.45336 | 0.007 | 0.435 | ##### | ILC | Bicc1     |
| ##### | -1.64973 | 0.009 | 0.433 | ##### | ILC | Tcf21     |
| ##### | -2.85351 | 0.197 | 0.562 | ##### | ILC | Egr1      |
| ##### | -1.50984 | 0.006 | 0.431 | ##### | ILC | Cavin3    |
| ##### | -1.62134 | 0.017 | 0.442 | ##### | ILC | Olfml3    |
| ##### | -1.52547 | 0.009 | 0.429 | ##### | ILC | Ptgis     |
| ##### | -1.51193 | 0.011 | 0.428 | ##### | ILC | Nupr1     |
| ##### | -1.84831 | 0.042 | 0.462 | ##### | ILC | Ier3      |
| ##### | -2.23019 | 0.558 | 0.786 | ##### | ILC | Fos       |
| ##### | -1.55839 | 0.005 | 0.418 | ##### | ILC | Oaf       |
| ##### | -1.71181 | 0.01  | 0.422 | ##### | ILC | Islr      |
| ##### | -1.41662 | 0.01  | 0.423 | ##### | ILC | Lama2     |
| ##### | -1.81336 | 0.009 | 0.421 | ##### | ILC | Ogn       |
| ##### | -2.5321  | 0.032 | 0.441 | ##### | ILC | Mfap5     |
| ##### | -1.3911  | 0.015 | 0.427 | ##### | ILC | Ddah2     |
| ##### | -1.45238 | 0.018 | 0.429 | ##### | ILC | Plxdc2    |
| ##### | -1.64983 | 0.021 | 0.434 | ##### | ILC | Spry1     |
| ##### | -1.66236 | 0.092 | 0.494 | ##### | ILC | Serpinb6a |
| ##### | 1.078835 | 0.518 | 0.232 | ##### | ILC | Zcchc11   |
| ##### | -1.54803 | 0.205 | 0.583 | ##### | ILC | Cyb5a     |
| ##### | -1.25737 | 0.007 | 0.416 | ##### | ILC | S100a16   |
| ##### | 1.074167 | 0.684 | 0.438 | ##### | ILC | Higd1a    |
| ##### | -2.0836  | 0.077 | 0.488 | ##### | ILC | Atf3      |
| ##### | -1.51283 | 0.011 | 0.416 | ##### | ILC | Ramp2     |
| ##### | -1.96159 | 0.029 | 0.433 | ##### | ILC | Ckb       |
| ##### | -1.20536 | 0.007 | 0.41  | ##### | ILC | Fkbp9     |
| ##### | -1.71212 | 0.302 | 0.635 | ##### | ILC | Rhob      |
| ##### | -1.32726 | 0.007 | 0.408 | ##### | ILC | Entpd2    |
| ##### | -1.26266 | 0.012 | 0.414 | ##### | ILC | Itgb5     |
| ##### | -1.27533 | 0.011 | 0.41  | ##### | ILC | Pdgfra    |
| ##### | -1.28737 | 0.012 | 0.411 | ##### | ILC | Nfia      |
| ##### | -1.3094  | 0.012 | 0.41  | ##### | ILC | Fhl1      |
| ##### | -1.34512 | 0.009 | 0.404 | ##### | ILC | Adamts2   |
| ##### | -1.21052 | 0.013 | 0.41  | ##### | ILC | Pkd2      |
| ##### | -1.86239 | 0.149 | 0.527 | ##### | ILC | Gstm1     |
| ##### | -1.36889 | 0.006 | 0.399 | ##### | ILC | Fbln5     |
| ##### | -1.34204 | 0.016 | 0.41  | ##### | ILC | Col5a1    |
| ##### | 1.060208 | 0.719 | 0.487 | ##### | ILC | Anp32b    |
| ##### | -2.30484 | 0.015 | 0.405 | ##### | ILC | Dpep1     |
| ##### | -1.20999 | 0.987 | 0.989 | ##### | ILC | Ftl1      |
| ##### | -1.21167 | 0.012 | 0.404 | ##### | ILC | Cald1     |
| ##### | -1.28888 | 0.01  | 0.4   | ##### | ILC | Col5a2    |
| ##### | -3.04207 | 0.042 | 0.432 | ##### | ILC | Hspb1     |
| ##### | -1.15379 | 0.005 | 0.393 | ##### | ILC | Fermt2    |
| ##### | -1.53527 | 0.011 | 0.399 | ##### | ILC | Adamts5   |
| ##### | -1.29446 | 0.05  | 0.443 | ##### | ILC | Nfic      |
| ##### | -1.19951 | 0.092 | 0.496 | ##### | ILC | Sntb2     |
| ##### | -2.31935 | 0.017 | 0.401 | ##### | ILC | Meg3      |
| ##### | -1.19091 | 0.005 | 0.389 | ##### | ILC | Mxra7     |
| ##### | -1.46816 | 0.026 | 0.413 | ##### | ILC | Pam       |
| ##### | -1.30446 | 0.006 | 0.388 | ##### | ILC | Sod3      |
| ##### | -1.598   | 0.216 | 0.553 | ##### | ILC | Mtch1     |

|          |          |       |       |          |     |          |
|----------|----------|-------|-------|----------|-----|----------|
| #####    | -1.30601 | 0.007 | 0.388 | #####    | ILC | Ace      |
| #####    | -1.2563  | 0.003 | 0.381 | #####    | ILC | Medag    |
| #####    | -1.18394 | 0.005 | 0.383 | #####    | ILC | Nav1     |
| #####    | -1.04304 | 0.01  | 0.391 | #####    | ILC | Ckap4    |
| #####    | -1.17083 | 0.13  | 0.544 | #####    | ILC | Tnfrsf1a |
| #####    | -1.63775 | 0.01  | 0.388 | #####    | ILC | Col8a1   |
| #####    | -1.35112 | 0.009 | 0.385 | #####    | ILC | Fbn1     |
| #####    | -1.05755 | 0.05  | 0.441 | #####    | ILC | Grn      |
| #####    | -1.2356  | 0.014 | 0.39  | #####    | ILC | Emilin1  |
| #####    | -1.45617 | 0.011 | 0.386 | #####    | ILC | Col6a3   |
| #####    | -2.06796 | 0.011 | 0.385 | #####    | ILC | C3       |
| #####    | -1.0601  | 0.011 | 0.386 | #####    | ILC | Fgfr1    |
| #####    | -2.48197 | 0.034 | 0.408 | #####    | ILC | Thbs1    |
| #####    | -1.13058 | 0.61  | 0.812 | #####    | ILC | Psap     |
| #####    | -1.02451 | 0.012 | 0.385 | #####    | ILC | Fkbp7    |
| #####    | -1.17354 | 0.225 | 0.591 | #####    | ILC | Ctsz     |
| #####    | -3.18155 | 0.061 | 0.431 | #####    | ILC | Apoe     |
| #####    | -1.64542 | 0.01  | 0.38  | #####    | ILC | Timp3    |
| #####    | -1.49735 | 0.009 | 0.377 | #####    | ILC | Pcolce2  |
| #####    | -1.16164 | 0.009 | 0.377 | #####    | ILC | Lama4    |
| #####    | -1.70564 | 0.029 | 0.404 | #####    | ILC | Trib1    |
| #####    | -1.46721 | 0.122 | 0.493 | #####    | ILC | Tcf4     |
| #####    | -1.01924 | 0.005 | 0.373 | #####    | ILC | P3h3     |
| #####    | -1.33613 | 0.096 | 0.487 | #####    | ILC | Ehd1     |
| #####    | -1.28982 | 0.004 | 0.369 | #####    | ILC | Ppp1r14a |
| #####    | 1.087819 | 0.741 | 0.543 | #####    | ILC | Ankrd11  |
| #####    | -1.06404 | 0.007 | 0.373 | #####    | ILC | Cavin1   |
| #####    | -1.18775 | 0.369 | 0.648 | #####    | ILC | Lamp1    |
| #####    | -1.09851 | 0.009 | 0.369 | #####    | ILC | Il11ra1  |
| #####    | -1.13275 | 0.005 | 0.365 | #####    | ILC | Aebp1    |
| #####    | -1.03392 | 0.004 | 0.363 | #####    | ILC | Mmp23    |
| #####    | -1.48125 | 0.035 | 0.398 | #####    | ILC | Atf5     |
| #####    | -1.15907 | 0.145 | 0.514 | #####    | ILC | Tmed3    |
| #####    | -1.31587 | 0.358 | 0.626 | #####    | ILC | Laptm4a  |
| #####    | -1.4564  | 0.263 | 0.591 | #####    | ILC | Selenop  |
| #####    | -1.06292 | 0.002 | 0.354 | 1.45E-99 | ILC | Vwal     |
| #####    | -1.05795 | 0.005 | 0.357 | 4.97E-99 | ILC | Dpysl3   |
| #####    | -1.1651  | 0.011 | 0.364 | 9.82E-99 | ILC | Angptl2  |
| #####    | -1.26631 | 0.013 | 0.366 | 9.88E-99 | ILC | Serpine2 |
| #####    | -1.06954 | 0.057 | 0.426 | 1.74E-98 | ILC | Rras     |
| #####    | -1.05043 | 0.066 | 0.432 | 9.37E-98 | ILC | Vkorc1   |
| #####    | -1.21294 | 0.009 | 0.358 | 2.52E-97 | ILC | Tm4sf1   |
| #####    | -1.15    | 0.308 | 0.624 | 1.05E-96 | ILC | Ctsb     |
| #####    | -1.21885 | 0.006 | 0.351 | 7.40E-96 | ILC | Htral    |
| 2.71E-99 | -1.49115 | 0.392 | 0.681 | 4.88E-95 | ILC | Zfp36    |
| 2.97E-99 | -1.27804 | 0.104 | 0.468 | 5.35E-95 | ILC | Emp1     |
| 7.66E-99 | -1.6038  | 0.019 | 0.367 | 1.38E-94 | ILC | Tnfaip2  |
| 1.45E-98 | -1.20136 | 0.028 | 0.376 | 2.61E-94 | ILC | Selenbp1 |
| 1.88E-98 | -1.56272 | 0.01  | 0.35  | 3.39E-94 | ILC | Spon2    |
| 5.56E-98 | -1.55003 | 0.015 | 0.355 | 1.00E-93 | ILC | Aspn     |
| 3.72E-97 | -1.3694  | 0.009 | 0.346 | 6.71E-93 | ILC | Gfpt2    |
| 5.28E-96 | -1.45189 | 0.004 | 0.337 | 9.51E-92 | ILC | Nb11     |
| 5.81E-96 | -1.06665 | 0.007 | 0.342 | 1.05E-91 | ILC | Col4a2   |
| 1.24E-95 | -1.28921 | 0.006 | 0.341 | 2.23E-91 | ILC | Eln      |

|          |          |       |       |          |     |         |
|----------|----------|-------|-------|----------|-----|---------|
| 7.31E-95 | -1.16782 | 0.011 | 0.342 | 1.32E-90 | ILC | Plala   |
| 6.69E-92 | -1.08125 | 0.083 | 0.425 | 1.21E-87 | ILC | Slc29a1 |
| 7.41E-92 | -1.2528  | 0.005 | 0.329 | 1.33E-87 | ILC | Gsta3   |
| 1.42E-91 | -1.11325 | 0.003 | 0.324 | 2.56E-87 | ILC | Sfrp1   |
| 1.02E-89 | -1.19773 | 0.016 | 0.338 | 1.83E-85 | ILC | Gda     |
| 2.80E-89 | -1.11262 | 0.009 | 0.327 | 5.05E-85 | ILC | Col5a3  |
| 1.07E-88 | -1.01531 | 0.003 | 0.316 | 1.92E-84 | ILC | Scara5  |
| 1.90E-87 | -1.13293 | 0.155 | 0.477 | 3.42E-83 | ILC | Nedd4   |
| 1.91E-87 | -1.053   | 0.007 | 0.32  | 3.44E-83 | ILC | Fxyd6   |
| 1.38E-85 | -1.34837 | 0.215 | 0.532 | 2.48E-81 | ILC | Cdkn1a  |
| 1.14E-84 | -2.10255 | 0.02  | 0.327 | 2.06E-80 | ILC | Cyr61   |
| 1.49E-84 | -2.55739 | 0.042 | 0.351 | 2.69E-80 | ILC | Cxcl1   |
| 2.68E-84 | -1.04513 | 0.001 | 0.301 | 4.82E-80 | ILC | Gas6    |
| 5.16E-84 | -1.0725  | 0.005 | 0.308 | 9.30E-80 | ILC | Fibin   |
| 4.91E-83 | -1.31349 | 0.691 | 0.83  | 8.84E-79 | ILC | Duspl   |
| 1.34E-82 | -1.0978  | 0.005 | 0.304 | 2.42E-78 | ILC | Adamts1 |
| 5.47E-81 | -1.22942 | 0.185 | 0.499 | 9.84E-77 | ILC | Klf9    |
| 4.69E-79 | -2.05988 | 0.067 | 0.37  | 8.44E-75 | ILC | Gm12840 |
| 1.74E-78 | -3.00037 | 0.175 | 0.483 | 3.13E-74 | ILC | Msrbl   |
| 5.71E-78 | -1.08856 | 0.031 | 0.329 | 1.03E-73 | ILC | Bag3    |
| 1.07E-77 | 1.172158 | 0.631 | 0.45  | 1.93E-73 | ILC | Ubal2   |
| 1.23E-77 | -1.02893 | 0.155 | 0.468 | 2.22E-73 | ILC | Rhoc    |
| 1.28E-77 | -1.13265 | 0.542 | 0.776 | 2.31E-73 | ILC | Sat1    |
| 2.48E-77 | -1.06585 | 0.002 | 0.284 | 4.47E-73 | ILC | Fmo2    |
| 2.95E-77 | -1.19884 | 0.277 | 0.54  | 5.31E-73 | ILC | Sptbn1  |
| 4.89E-77 | -1.7926  | 0.266 | 0.531 | 8.80E-73 | ILC | Socs3   |
| 7.33E-77 | -1.68619 | 0.021 | 0.309 | 1.32E-72 | ILC | Mt2     |
| 7.50E-76 | -1.31248 | 0.146 | 0.453 | 1.35E-71 | ILC | Errfil  |
| 9.17E-75 | -1.13533 | 0.013 | 0.292 | 1.65E-70 | ILC | Tppp3   |
| 7.25E-74 | -1.63126 | 0.007 | 0.281 | 1.31E-69 | ILC | Ctgf    |
| 3.10E-73 | -1.71233 | 0.221 | 0.498 | 5.58E-69 | ILC | Klf4    |
| 1.50E-71 | -1.26384 | 0.01  | 0.279 | 2.69E-67 | ILC | Ackr3   |
| 3.55E-71 | -1.01875 | 0.013 | 0.281 | 6.40E-67 | ILC | Sirpa   |
| 4.60E-71 | -1.73451 | 0.025 | 0.296 | 8.29E-67 | ILC | Tgfb1   |
| 2.29E-70 | -1.09701 | 0.402 | 0.7   | 4.13E-66 | ILC | Gpx1    |
| 2.59E-70 | -1.25664 | 0.321 | 0.545 | 4.66E-66 | ILC | Zbtb20  |
| 2.89E-70 | -2.45248 | 0.033 | 0.299 | 5.20E-66 | ILC | Alox5ap |
| 1.97E-69 | -1.23042 | 0.014 | 0.279 | 3.54E-65 | ILC | Tgm2    |
| 3.90E-69 | -1.16698 | 0.007 | 0.268 | 7.02E-65 | ILC | Hmox1   |
| 1.83E-68 | -1.66383 | 0.6   | 0.806 | 3.30E-64 | ILC | S100a11 |
| 2.84E-68 | -1.27562 | 0.494 | 0.645 | 5.11E-64 | ILC | Tubal1  |
| 5.62E-68 | -2.32175 | 0.041 | 0.304 | 1.01E-63 | ILC | Lst1    |
| 8.74E-68 | -1.14686 | 0.096 | 0.382 | 1.57E-63 | ILC | Uap1    |
| 6.02E-66 | -2.33165 | 0.047 | 0.307 | 1.08E-61 | ILC | Slc16a3 |
| 2.06E-61 | -1.78296 | 0.018 | 0.257 | 3.71E-57 | ILC | Spil    |
| 2.38E-61 | -2.76905 | 0.04  | 0.282 | 4.29E-57 | ILC | Ccl6    |
| 6.10E-61 | -2.57383 | 0.025 | 0.263 | 1.10E-56 | ILC | Hp      |
| 3.32E-60 | -1.62204 | 0.295 | 0.576 | 5.98E-56 | ILC | Grina   |
| 9.59E-60 | -2.33374 | 0.024 | 0.259 | 1.73E-55 | ILC | Csf3r   |
| 1.60E-59 | -2.79267 | 0.025 | 0.261 | 2.88E-55 | ILC | Il1r2   |
| 1.19E-58 | -2.05488 | 0.55  | 0.643 | 2.15E-54 | ILC | Jun     |
| 1.52E-58 | -1.13174 | 0.296 | 0.537 | 2.73E-54 | ILC | Fosb    |
| 2.42E-58 | -1.08852 | 0.259 | 0.514 | 4.36E-54 | ILC | Pmepal  |
| 1.10E-55 | -1.03948 | 0.593 | 0.782 | 1.99E-51 | ILC | Txn1    |

|          |          |       |       |          |         |           |
|----------|----------|-------|-------|----------|---------|-----------|
| 2.01E-55 | -2.58621 | 0.029 | 0.252 | 3.62E-51 | ILC     | Hdc       |
| 3.24E-55 | -3.16061 | 0.046 | 0.272 | 5.84E-51 | ILC     | I11b      |
| 8.30E-55 | -1.05074 | 0.362 | 0.607 | 1.49E-50 | ILC     | Anxa1     |
| 4.38E-54 | -1.93788 | 0.051 | 0.272 | 7.89E-50 | ILC     | Ncf2      |
| 1.21E-53 | -4.04727 | 0.096 | 0.319 | 2.18E-49 | ILC     | Lyz2      |
| 2.69E-53 | -1.86242 | 0.09  | 0.321 | 4.83E-49 | ILC     | Plaur     |
| 3.57E-53 | -1.19742 | 0.109 | 0.356 | 6.42E-49 | ILC     | Gadd45g   |
| 3.25E-50 | -1.53089 | 0.116 | 0.35  | 5.86E-46 | ILC     | Rnf149    |
| 4.36E-50 | -1.54629 | 0.107 | 0.334 | 7.85E-46 | ILC     | Ets2      |
| 4.44E-49 | -1.40632 | 0.063 | 0.275 | 7.99E-45 | ILC     | Tpd52     |
| 5.23E-48 | -1.53226 | 0.793 | 0.663 | 9.42E-44 | ILC     | Hbb-bs    |
| 6.01E-48 | -4.98204 | 0.127 | 0.337 | 1.08E-43 | ILC     | Retnlg    |
| 2.16E-45 | -1.0746  | 0.103 | 0.325 | 3.88E-41 | ILC     | Tmcc1     |
| 3.97E-43 | -5.30271 | 0.281 | 0.476 | 7.15E-39 | ILC     | S100a8    |
| 2.98E-40 | -1.0888  | 0.418 | 0.653 | 5.37E-36 | ILC     | Prdx5     |
| 3.98E-38 | -1.53762 | 0.649 | 0.493 | 7.16E-34 | ILC     | Hba-a1    |
| 5.06E-35 | -1.79312 | 0.731 | 0.845 | 9.10E-31 | ILC     | Cebpb     |
| 2.22E-32 | -1.80553 | 0.132 | 0.29  | 4.00E-28 | ILC     | Lmnbl     |
| 6.31E-31 | -5.26727 | 0.35  | 0.509 | 1.14E-26 | ILC     | S100a9    |
| 1.03E-28 | -1.31331 | 0.472 | 0.658 | 1.85E-24 | ILC     | Talldol   |
| 7.59E-22 | -2.32166 | 0.14  | 0.268 | 1.37E-17 | ILC     | Ccrl2     |
| 1.59E-15 | -1.24176 | 0.159 | 0.273 | 2.86E-11 | ILC     | Isg15     |
| 0        | 6.943457 | 0.985 | 0.049 | 0        | B cells | Igkc      |
| 0        | 5.568732 | 0.991 | 0.081 | 0        | B cells | Cd74      |
| 0        | 5.229647 | 0.98  | 0.01  | 0        | B cells | Cd79a     |
| 0        | 4.863345 | 0.948 | 0.031 | 0        | B cells | Ighm      |
| 0        | 4.462581 | 0.966 | 0.04  | 0        | B cells | H2-Aa     |
| 0        | 4.373685 | 0.958 | 0.025 | 0        | B cells | H2-Eb1    |
| 0        | 3.790688 | 0.939 | 0.037 | 0        | B cells | H2-Ab1    |
| 0        | 3.384176 | 0.828 | 0.005 | 0        | B cells | Ighd      |
| 0        | 3.241432 | 0.684 | 0.004 | 0        | B cells | Cd79b     |
| 0        | 3.17758  | 0.349 | 0.003 | 0        | B cells | Iglc3     |
| 0        | 3.141209 | 0.962 | 0.405 | 0        | B cells | Ebf1      |
| 0        | 3.104077 | 0.757 | 0.004 | 0        | B cells | Fcmr      |
| 0        | 2.995951 | 0.52  | 0.003 | 0        | B cells | Iglc2     |
| 0        | 2.992748 | 0.813 | 0.145 | 0        | B cells | Mef2c     |
| 0        | 2.887555 | 0.702 | 0.09  | 0        | B cells | Cd83      |
| 0        | 2.860872 | 0.801 | 0.071 | 0        | B cells | Ccr7      |
| 0        | 2.599509 | 0.617 | 0.004 | 0        | B cells | Pou2af1   |
| 0        | 2.430012 | 0.606 | 0.007 | 0        | B cells | Tnfrsf13c |
| 0        | 2.410608 | 0.548 | 0.006 | 0        | B cells | Fcrla     |
| 0        | 2.295446 | 0.863 | 0.237 | 0        | B cells | Cd37      |
| 0        | 2.295338 | 0.581 | 0.007 | 0        | B cells | Bank1     |
| 0        | 2.230033 | 0.493 | 0.003 | 0        | B cells | Ms4a1     |
| 0        | 2.195721 | 0.466 | 0.004 | 0        | B cells | Mzb1      |
| 0        | 2.168041 | 0.602 | 0.116 | 0        | B cells | Rel       |
| 0        | 2.154162 | 0.674 | 0.088 | 0        | B cells | Napsa     |
| 0        | 2.14541  | 0.737 | 0.174 | 0        | B cells | Satb1     |
| 0        | 2.116172 | 0.52  | 0.006 | 0        | B cells | H2-DMb2   |
| 0        | 2.084804 | 0.504 | 0.004 | 0        | B cells | H2-Ob     |
| 0        | 1.983413 | 0.569 | 0.051 | 0        | B cells | H2-DMa    |
| 0        | 1.965338 | 0.408 | 0.002 | 0        | B cells | Fcer2a    |
| 0        | 1.928832 | 0.812 | 0.283 | 0        | B cells | Fam107b   |
| 0        | 1.882303 | 0.472 | 0.002 | 0        | B cells | Cd19      |



|       |          |       |       |               |          |
|-------|----------|-------|-------|---------------|----------|
| 0     | 1.772923 | 0.438 | 0.032 | 0 B cells     | Ralgps2  |
| 0     | 1.754604 | 0.282 | 0.002 | 0 B cells     | Ly6d     |
| 0     | 1.706155 | 0.395 | 0.004 | 0 B cells     | Cxcr5    |
| 0     | 1.689875 | 0.317 | 0.001 | 0 B cells     | Vpreb3   |
| 0     | 1.66113  | 0.715 | 0.175 | 0 B cells     | Dusp2    |
| 0     | 1.579391 | 0.373 | 0.013 | 0 B cells     | H2-0a    |
| 0     | 1.573847 | 0.346 | 0.007 | 0 B cells     | Siglecg  |
| 0     | 1.484827 | 0.416 | 0.058 | 0 B cells     | Lamb3    |
| 0     | 1.433841 | 0.314 | 0.002 | 0 B cells     | Pax5     |
| 0     | 1.346167 | 0.308 | 0.014 | 0 B cells     | Cd72     |
| 0     | 1.331468 | 0.26  | 0.002 | 0 B cells     | Spib     |
| 0     | 1.323911 | 0.313 | 0.023 | 0 B cells     | Ly86     |
| 0     | 1.300425 | 0.302 | 0.016 | 0 B cells     | Mtss1    |
| 0     | 1.282633 | 1     | 0.991 | 0 B cells     | Fau      |
| 0     | 1.22528  | 0.592 | 0.108 | 0 B cells     | Ctss     |
| 0     | 1.15057  | 0.256 | 0.002 | 0 B cells     | Gm31243  |
| 0     | -4.24932 | 0.109 | 0.892 | 0 B cells     | S100a6   |
| ##### | -2.06663 | 0.703 | 0.962 | ##### B cells | Itm2b    |
| ##### | 1.547646 | 0.614 | 0.135 | ##### B cells | Ptprecap |
| ##### | 1.40831  | 1     | 0.865 | ##### B cells | Rps24    |
| ##### | 1.501471 | 0.996 | 0.788 | ##### B cells | Rps20    |
| ##### | 1.121402 | 0.301 | 0.031 | ##### B cells | H2-DMb1  |
| ##### | 2.468643 | 0.862 | 0.486 | ##### B cells | Smc6     |
| ##### | 1.41868  | 0.999 | 0.968 | ##### B cells | Rps27    |
| ##### | 1.648543 | 0.428 | 0.071 | ##### B cells | Stap1    |
| ##### | 1.329393 | 0.999 | 0.808 | ##### B cells | Rps19    |
| ##### | 1.482205 | 0.354 | 0.049 | ##### B cells | Gpr171   |
| ##### | 1.532946 | 0.989 | 0.95  | ##### B cells | H3f3a    |
| ##### | -3.42344 | 0.068 | 0.783 | ##### B cells | Ifitm2   |
| ##### | 1.20263  | 0.997 | 0.844 | ##### B cells | Rps3a1   |
| ##### | 1.322588 | 0.259 | 0.025 | ##### B cells | Pou2f2   |
| ##### | -2.71134 | 0.053 | 0.783 | ##### B cells | Anxa2    |
| ##### | 1.195252 | 0.999 | 0.92  | ##### B cells | Rpl18a   |
| ##### | 1.215516 | 0.996 | 0.842 | ##### B cells | Rps7     |
| ##### | 1.097179 | 0.999 | 0.884 | ##### B cells | Rpl35a   |
| ##### | 1.158419 | 1     | 0.867 | ##### B cells | Rps13    |
| ##### | 1.061106 | 0.999 | 0.922 | ##### B cells | Rpl9     |
| ##### | -2.39366 | 0.105 | 0.802 | ##### B cells | Ctsd     |
| ##### | 1.535726 | 0.462 | 0.094 | ##### B cells | P2ry10   |
| ##### | -3.55905 | 0.058 | 0.734 | ##### B cells | Ifitm3   |
| ##### | 1.136769 | 0.999 | 0.935 | ##### B cells | Rps29    |
| ##### | 1.302176 | 0.332 | 0.05  | ##### B cells | Trp53i11 |
| ##### | 1.468987 | 0.332 | 0.051 | ##### B cells | Hvcn1    |
| ##### | 1.106092 | 0.989 | 0.836 | ##### B cells | Rpl7     |
| ##### | 1.826626 | 0.867 | 0.567 | ##### B cells | Serp1    |
| ##### | 1.154611 | 0.313 | 0.044 | ##### B cells | Plekhol  |
| ##### | 1.056097 | 0.999 | 0.858 | ##### B cells | Rpl8     |
| ##### | 1.084662 | 1     | 0.812 | ##### B cells | Rps15a   |
| ##### | -2.32075 | 0.147 | 0.797 | ##### B cells | Txn1     |
| ##### | 1.054287 | 0.999 | 0.878 | ##### B cells | Rpl34    |
| ##### | 1.074552 | 0.999 | 0.867 | ##### B cells | Rps3     |
| ##### | 1.023242 | 1     | 0.823 | ##### B cells | Rps4x    |
| ##### | 1.05888  | 0.997 | 0.818 | ##### B cells | Rpl6     |
| ##### | 1.045473 | 0.997 | 0.873 | ##### B cells | mt-Co2   |

|       |          |       |       |       |         |          |
|-------|----------|-------|-------|-------|---------|----------|
| ##### | 1.248906 | 0.314 | 0.046 | ##### | B cells | Ppp1r16b |
| ##### | 1.260059 | 0.991 | 0.8   | ##### | B cells | Ptma     |
| ##### | 1.186104 | 0.985 | 0.761 | ##### | B cells | Rpl12    |
| ##### | 1.055251 | 0.999 | 0.804 | ##### | B cells | Rpl32    |
| ##### | 1.273063 | 0.582 | 0.148 | ##### | B cells | Gimap6   |
| ##### | 1.042897 | 0.997 | 0.896 | ##### | B cells | Rpl17    |
| ##### | 1.029167 | 0.997 | 0.85  | ##### | B cells | Rpl39    |
| ##### | 1.432071 | 0.469 | 0.106 | ##### | B cells | I12rg    |
| ##### | 1.083692 | 0.995 | 0.897 | ##### | B cells | Rps10    |
| ##### | 1.001102 | 0.997 | 0.839 | ##### | B cells | Rpl19    |
| ##### | 1.162259 | 0.293 | 0.043 | ##### | B cells | Chchd10  |
| ##### | -2.67931 | 0.023 | 0.667 | ##### | B cells | Timp2    |
| ##### | 1.253033 | 0.972 | 0.763 | ##### | B cells | mt-Nd2   |
| ##### | 1.586394 | 0.732 | 0.29  | ##### | B cells | Ets1     |
| ##### | -4.2722  | 0.073 | 0.676 | ##### | B cells | Cebpd    |
| ##### | 1.782041 | 0.68  | 0.297 | ##### | B cells | Foxp1    |
| ##### | -2.75399 | 0.256 | 0.817 | ##### | B cells | S100a11  |
| ##### | -2.74379 | 0.127 | 0.697 | ##### | B cells | Lgals1   |
| ##### | -3.01659 | 0.02  | 0.622 | ##### | B cells | Cd63     |
| ##### | 1.025654 | 0.985 | 0.787 | ##### | B cells | mt-Nd1   |
| ##### | 1.016818 | 0.989 | 0.861 | ##### | B cells | Rps21    |
| ##### | 1.758675 | 0.534 | 0.186 | ##### | B cells | Scd1     |
| ##### | -2.79655 | 0.028 | 0.623 | ##### | B cells | Cd9      |
| ##### | 1.684407 | 0.65  | 0.292 | ##### | B cells | Snx5     |
| ##### | -2.47641 | 0.227 | 0.79  | ##### | B cells | Fxyd5    |
| ##### | -2.26189 | 0.027 | 0.617 | ##### | B cells | Anxa1    |
| ##### | 1.191442 | 0.341 | 0.069 | ##### | B cells | Prkcb    |
| ##### | -3.24622 | 0.034 | 0.603 | ##### | B cells | Pi16     |
| ##### | 1.233142 | 0.359 | 0.076 | ##### | B cells | Gm8369   |
| ##### | 1.364932 | 0.469 | 0.139 | ##### | B cells | Cyth1    |
| ##### | -5.34528 | 0.416 | 0.784 | ##### | B cells | Gsn      |
| ##### | 1.455875 | 0.828 | 0.637 | ##### | B cells | Gdi2     |
| ##### | 1.359818 | 0.763 | 0.335 | ##### | B cells | Vps37b   |
| ##### | 1.283539 | 0.456 | 0.132 | ##### | B cells | Ctsh     |
| ##### | -2.33288 | 0.101 | 0.624 | ##### | B cells | Anxa5    |
| ##### | -2.70987 | 0.02  | 0.562 | ##### | B cells | Crispld2 |
| ##### | -2.74208 | 0.08  | 0.595 | ##### | B cells | Ctsl     |
| ##### | -2.90275 | 0.024 | 0.559 | ##### | B cells | Igfbp4   |
| ##### | -1.85341 | 0.019 | 0.559 | ##### | B cells | App      |
| ##### | -1.6792  | 0.007 | 0.545 | ##### | B cells | Tnfrsf1a |
| ##### | 1.63491  | 0.524 | 0.202 | ##### | B cells | Ptp4a3   |
| ##### | -1.83202 | 0.135 | 0.647 | ##### | B cells | Ptms     |
| ##### | -4.23098 | 0.089 | 0.589 | ##### | B cells | Igfbp7   |
| ##### | -2.07405 | 0.024 | 0.562 | ##### | B cells | Mgst1    |
| ##### | -2.17496 | 0.072 | 0.596 | ##### | B cells | Selenop  |
| ##### | -4.05641 | 0.057 | 0.56  | ##### | B cells | Bgn      |
| ##### | 1.533653 | 0.691 | 0.38  | ##### | B cells | Tgfb1    |
| ##### | 1.244314 | 0.858 | 0.685 | ##### | B cells | Shisa5   |
| ##### | 1.13765  | 0.341 | 0.08  | ##### | B cells | Acp5     |
| ##### | -3.40196 | 0.024 | 0.532 | ##### | B cells | Serping1 |
| ##### | -4.55676 | 0.102 | 0.586 | ##### | B cells | Mgp      |
| ##### | -3.7622  | 0.054 | 0.551 | ##### | B cells | Htra3    |
| ##### | 1.221854 | 0.362 | 0.09  | ##### | B cells | Rhoh     |
| ##### | 1.656975 | 0.706 | 0.408 | ##### | B cells | Ezr      |

|       |          |       |       |       |         |          |
|-------|----------|-------|-------|-------|---------|----------|
| ##### | -3.93747 | 0.052 | 0.545 | ##### | B cells | Sparc    |
| ##### | -3.18263 | 0.02  | 0.53  | ##### | B cells | G0s2     |
| ##### | -3.44355 | 0.045 | 0.538 | ##### | B cells | Lum      |
| ##### | -2.1324  | 0.431 | 0.774 | ##### | B cells | Vim      |
| ##### | -5.45103 | 0.257 | 0.656 | ##### | B cells | Dcn      |
| ##### | -1.90794 | 0.442 | 0.838 | ##### | B cells | Dusp1    |
| ##### | -3.57295 | 0.041 | 0.531 | ##### | B cells | Clec3b   |
| ##### | -2.95431 | 0.025 | 0.52  | ##### | B cells | Pcolce   |
| ##### | -2.91264 | 0.045 | 0.531 | ##### | B cells | Ltbp4    |
| ##### | -3.49106 | 0.076 | 0.549 | ##### | B cells | Sparcl1  |
| ##### | -2.70521 | 0.025 | 0.52  | ##### | B cells | Cygb     |
| ##### | -2.06502 | 0.023 | 0.513 | ##### | B cells | Selenom  |
| ##### | -1.9062  | 0.012 | 0.509 | ##### | B cells | Rnase4   |
| ##### | 1.187278 | 0.366 | 0.099 | ##### | B cells | Dgkd     |
| ##### | -2.41103 | 0.028 | 0.52  | ##### | B cells | Rarres2  |
| ##### | -3.2053  | 0.038 | 0.52  | ##### | B cells | Colla2   |
| ##### | -2.32024 | 0.04  | 0.528 | ##### | B cells | Gstm1    |
| ##### | -3.00858 | 0.036 | 0.521 | ##### | B cells | Gpx3     |
| ##### | -1.55983 | 0.135 | 0.628 | ##### | B cells | Ctsb     |
| ##### | -2.12469 | 0.016 | 0.505 | ##### | B cells | Lhfp     |
| ##### | -1.35198 | 0.267 | 0.747 | ##### | B cells | Tspo     |
| ##### | -2.54435 | 0.432 | 0.789 | ##### | B cells | Fos      |
| ##### | -1.5224  | 0.034 | 0.525 | ##### | B cells | Itm2c    |
| ##### | 1.132997 | 0.765 | 0.365 | ##### | B cells | Cytip    |
| ##### | -2.04678 | 0.016 | 0.503 | ##### | B cells | Lrp1     |
| ##### | -3.03091 | 0.099 | 0.563 | ##### | B cells | Egr1     |
| ##### | -1.77962 | 0.109 | 0.583 | ##### | B cells | Cyb5a    |
| ##### | -1.5656  | 0.2   | 0.691 | ##### | B cells | Crip1    |
| ##### | -1.72536 | 0.041 | 0.533 | ##### | B cells | Marcks   |
| ##### | 1.451676 | 0.499 | 0.193 | ##### | B cells | Crem     |
| ##### | -2.49446 | 0.028 | 0.504 | ##### | B cells | Cd34     |
| ##### | -3.06654 | 0.037 | 0.506 | ##### | B cells | Serpinh1 |
| ##### | -2.5646  | 0.02  | 0.494 | ##### | B cells | Col6a1   |
| ##### | -3.03305 | 0.027 | 0.501 | ##### | B cells | Fbln1    |
| ##### | 1.225971 | 0.365 | 0.096 | ##### | B cells | Cd69     |
| ##### | -2.4801  | 0.024 | 0.497 | ##### | B cells | Cfh      |
| ##### | -3.00121 | 0.041 | 0.506 | ##### | B cells | Colla1   |
| ##### | -3.41613 | 0.06  | 0.519 | ##### | B cells | Col3a1   |
| ##### | -1.8643  | 0.081 | 0.571 | ##### | B cells | Zyx      |
| ##### | -2.04768 | 0.016 | 0.488 | ##### | B cells | Pmp22    |
| ##### | -1.36835 | 0.424 | 0.817 | ##### | B cells | Psap     |
| ##### | 1.265102 | 0.797 | 0.581 | ##### | B cells | Rps27rt  |
| ##### | -2.00289 | 0.013 | 0.483 | ##### | B cells | Axl      |
| ##### | -2.03112 | 0.009 | 0.477 | ##### | B cells | Rbp1     |
| ##### | -1.71394 | 0.016 | 0.487 | ##### | B cells | Cd302    |
| ##### | -2.41601 | 0.025 | 0.49  | ##### | B cells | Serpinf1 |
| ##### | -1.64461 | 0.005 | 0.47  | ##### | B cells | Rhoc     |
| ##### | -2.43116 | 0.017 | 0.482 | ##### | B cells | Fbln2    |
| ##### | -1.78049 | 0.011 | 0.477 | ##### | B cells | Rcn3     |
| ##### | -2.13936 | 0.024 | 0.49  | ##### | B cells | Dpt      |
| ##### | -2.43109 | 0.02  | 0.482 | ##### | B cells | Col6a2   |
| ##### | -2.31819 | 0.04  | 0.5   | ##### | B cells | Mmp2     |
| ##### | -2.27196 | 0.02  | 0.484 | ##### | B cells | Fstl1    |
| ##### | -2.49336 | 0.02  | 0.481 | ##### | B cells | Ccdc80   |

|       |          |       |       |       |         |           |
|-------|----------|-------|-------|-------|---------|-----------|
| ##### | -2.00216 | 0.013 | 0.476 | ##### | B cells | Nfix      |
| ##### | -3.83504 | 0.107 | 0.554 | ##### | B cells | Mt1       |
| ##### | -3.47369 | 0.041 | 0.496 | ##### | B cells | Lpl       |
| ##### | -1.42693 | 0.058 | 0.536 | ##### | B cells | Dstn      |
| ##### | -1.8342  | 0.029 | 0.493 | ##### | B cells | Serpinb6a |
| ##### | -1.27013 | 0.158 | 0.658 | ##### | B cells | Rbms1     |
| ##### | -1.68684 | 0.042 | 0.505 | ##### | B cells | Nenf      |
| ##### | -1.41246 | 0.028 | 0.495 | ##### | B cells | Sntb2     |
| ##### | -2.43762 | 0.016 | 0.472 | ##### | B cells | Col15a1   |
| ##### | -1.65863 | 0.013 | 0.472 | ##### | B cells | Fosl2     |
| ##### | 1.189119 | 0.336 | 0.094 | ##### | B cells | Map3k1    |
| ##### | -2.48901 | 0.085 | 0.536 | ##### | B cells | Socs3     |
| ##### | -1.99101 | 0.013 | 0.468 | ##### | B cells | Hspg2     |
| ##### | -2.10047 | 0.021 | 0.475 | ##### | B cells | Nid1      |
| ##### | -2.57245 | 0.027 | 0.476 | ##### | B cells | Smoc2     |
| ##### | -1.71206 | 0.011 | 0.464 | ##### | B cells | Nfib      |
| ##### | -2.15564 | 0.106 | 0.581 | ##### | B cells | Grina     |
| ##### | -1.87894 | 0.009 | 0.46  | ##### | B cells | Prelp     |
| ##### | -1.87489 | 0.072 | 0.535 | ##### | B cells | Cdkn1a    |
| ##### | 1.240926 | 0.786 | 0.585 | ##### | B cells | Sub1      |
| ##### | -1.78622 | 0.117 | 0.554 | ##### | B cells | Mtch1     |
| ##### | -1.65162 | 0.008 | 0.456 | ##### | B cells | Rhoj      |
| ##### | -1.73258 | 0.017 | 0.466 | ##### | B cells | Mxra8     |
| ##### | -1.74001 | 0.021 | 0.472 | ##### | B cells | Sdc2      |
| ##### | -1.86608 | 0.017 | 0.464 | ##### | B cells | Loxl1     |
| ##### | -1.84655 | 0.011 | 0.457 | ##### | B cells | Tnxb      |
| ##### | -1.57022 | 0.031 | 0.479 | ##### | B cells | Nedd4     |
| ##### | -1.9935  | 0.013 | 0.457 | ##### | B cells | Col4a1    |
| ##### | -1.86923 | 0.013 | 0.459 | ##### | B cells | Ier3      |
| ##### | -1.57775 | 0.021 | 0.466 | ##### | B cells | Camk2n1   |
| ##### | -1.74525 | 0.007 | 0.449 | ##### | B cells | Gpm6b     |
| ##### | 1.02945  | 0.451 | 0.145 | ##### | B cells | Cd2       |
| ##### | -2.23291 | 0.041 | 0.485 | ##### | B cells | Atf3      |
| ##### | -1.36014 | 0.038 | 0.493 | ##### | B cells | Dhrs7     |
| ##### | -1.75533 | 0.024 | 0.468 | ##### | B cells | Slc43a3   |
| ##### | -1.35764 | 0.069 | 0.524 | ##### | B cells | Itgb1     |
| ##### | -1.61379 | 0.025 | 0.468 | ##### | B cells | Emp1      |
| ##### | -1.9308  | 0.019 | 0.458 | ##### | B cells | Ecml      |
| ##### | -1.71905 | 0.021 | 0.461 | ##### | B cells | Abca8a    |
| ##### | -1.57653 | 0.012 | 0.446 | ##### | B cells | Cpq       |
| ##### | -1.78861 | 0.038 | 0.477 | ##### | B cells | Crip2     |
| ##### | -1.66649 | 0.007 | 0.438 | ##### | B cells | Olfml3    |
| ##### | -2.06872 | 0.015 | 0.447 | ##### | B cells | Gas1      |
| ##### | -1.89637 | 0.016 | 0.446 | ##### | B cells | Pcsk6     |
| ##### | -2.51883 | 0.036 | 0.467 | ##### | B cells | Ly6a      |
| ##### | -1.46155 | 0.004 | 0.431 | ##### | B cells | Bicc1     |
| ##### | -1.41009 | 0.011 | 0.44  | ##### | B cells | Fxyd1     |
| ##### | -1.71208 | 0.232 | 0.635 | ##### | B cells | Rhob      |
| ##### | -1.79586 | 0.023 | 0.45  | ##### | B cells | Plpp3     |
| ##### | -1.51721 | 0.004 | 0.427 | ##### | B cells | Cavin3    |
| ##### | -1.79158 | 0.012 | 0.436 | ##### | B cells | Lamb1     |
| ##### | 1.215319 | 0.321 | 0.095 | ##### | B cells | Cnp       |
| ##### | 1.274227 | 0.336 | 0.105 | ##### | B cells | Nsf       |
| ##### | -1.62128 | 0.008 | 0.43  | ##### | B cells | Tcf21     |

|          |          |       |       |          |         |          |
|----------|----------|-------|-------|----------|---------|----------|
| #####    | -1.36883 | 0.143 | 0.611 | #####    | B cells | Mrpl33   |
| #####    | -1.32192 | 0.076 | 0.514 | #####    | B cells | Tmed3    |
| #####    | -1.69073 | 0.011 | 0.431 | #####    | B cells | Spry1    |
| #####    | -1.47346 | 0.009 | 0.426 | #####    | B cells | Plxdc2   |
| #####    | 1.219236 | 0.52  | 0.236 | #####    | B cells | Unc93b1  |
| #####    | -1.41404 | 0.911 | 0.978 | #####    | B cells | Actg1    |
| #####    | -1.27936 | 0.001 | 0.413 | #####    | B cells | S100a16  |
| #####    | -1.53987 | 0.003 | 0.413 | #####    | B cells | Ramp2    |
| #####    | -1.49385 | 0.012 | 0.426 | #####    | B cells | Ptgis    |
| #####    | -1.36442 | 0.023 | 0.44  | #####    | B cells | Nfic     |
| #####    | -1.49172 | 0.012 | 0.424 | 1.01E-99 | B cells | Nupr1    |
| #####    | -1.98083 | 0.019 | 0.43  | 2.73E-99 | B cells | Ckb      |
| #####    | -1.5462  | 0.005 | 0.414 | 3.12E-99 | B cells | Oaf      |
| #####    | -1.66858 | 0.036 | 0.454 | 8.67E-99 | B cells | Errfil   |
| #####    | -1.25396 | 0     | 0.406 | 9.92E-99 | B cells | Selenon  |
| #####    | -1.80443 | 0.009 | 0.417 | 1.41E-98 | B cells | Ogn      |
| #####    | -1.69149 | 0.011 | 0.419 | 1.57E-98 | B cells | Islr     |
| #####    | -1.59016 | 0.08  | 0.5   | 2.29E-98 | B cells | Klf9     |
| #####    | -1.26525 | 0.038 | 0.457 | 1.94E-97 | B cells | Fcgrt    |
| #####    | -2.45427 | 0.032 | 0.437 | 2.87E-97 | B cells | Mfap5    |
| #####    | -1.39176 | 0.013 | 0.42  | 4.44E-97 | B cells | Lama2    |
| #####    | -1.24648 | 0.004 | 0.407 | 4.69E-97 | B cells | Pkd2     |
| #####    | -1.12005 | 0.11  | 0.554 | 1.58E-96 | B cells | Ifi27    |
| #####    | -1.28104 | 0.005 | 0.407 | 4.25E-96 | B cells | Pdgfra   |
| #####    | -1.37724 | 0.007 | 0.407 | 5.03E-96 | B cells | Col5a1   |
| #####    | -1.14081 | 0.155 | 0.596 | 6.13E-96 | B cells | Lamp2    |
| #####    | -1.29732 | 0.007 | 0.408 | 7.21E-96 | B cells | Nfia     |
| #####    | -1.33355 | 0.005 | 0.404 | 1.31E-95 | B cells | Entpd2   |
| 2.04E-99 | -1.17656 | 0.007 | 0.406 | 3.67E-95 | B cells | Fkbp9    |
| 3.74E-99 | -1.30569 | 0.085 | 0.504 | 6.73E-95 | B cells | Lmna     |
| 4.01E-99 | 1.011416 | 0.45  | 0.17  | 7.22E-95 | B cells | Inpp5d   |
| 4.50E-99 | -1.26593 | 0.02  | 0.424 | 8.11E-95 | B cells | Slc29a1  |
| 6.12E-99 | 1.218786 | 0.729 | 0.564 | 1.10E-94 | B cells | Ncl      |
| 2.23E-98 | -1.49145 | 0.012 | 0.41  | 4.02E-94 | B cells | Pam      |
| 2.35E-98 | -1.30662 | 0.009 | 0.406 | 4.23E-94 | B cells | Fhl1     |
| 2.80E-98 | -1.35623 | 0.005 | 0.4   | 5.05E-94 | B cells | Adamts2  |
| 5.77E-98 | -1.5848  | 0.081 | 0.481 | 1.04E-93 | B cells | Lamc1    |
| 9.63E-98 | -1.23971 | 0.013 | 0.41  | 1.73E-93 | B cells | Itgb5    |
| 1.81E-97 | -1.53898 | 0.215 | 0.659 | 3.25E-93 | B cells | Prdx5    |
| 5.86E-97 | -1.18403 | 0.008 | 0.4   | 1.06E-92 | B cells | Rora     |
| 6.80E-97 | -1.31435 | 0.005 | 0.396 | 1.22E-92 | B cells | Col5a2   |
| 2.12E-96 | -1.22819 | 0.009 | 0.401 | 3.82E-92 | B cells | Cald1    |
| 2.93E-96 | -2.16592 | 0.061 | 0.467 | 5.27E-92 | B cells | AW112010 |
| 4.95E-96 | -1.10243 | 0.025 | 0.424 | 8.92E-92 | B cells | Snx18    |
| 7.93E-96 | -1.15945 | 0.003 | 0.389 | 1.43E-91 | B cells | Fermt2   |
| 3.46E-95 | 1.360022 | 0.462 | 0.222 | 6.24E-91 | B cells | Pkig     |
| 4.14E-95 | -1.27608 | 0.027 | 0.423 | 7.45E-91 | B cells | Ddah2    |
| 3.57E-94 | -1.29943 | 0.178 | 0.583 | 6.43E-90 | B cells | Ahnak    |
| 5.42E-94 | -2.24568 | 0.017 | 0.402 | 9.75E-90 | B cells | Dpep1    |
| 6.98E-94 | -2.29669 | 0.015 | 0.398 | 1.26E-89 | B cells | Meg3     |
| 7.02E-94 | -1.65591 | 0.759 | 0.847 | 1.26E-89 | B cells | Cst3     |
| 3.42E-93 | -1.25174 | 0.007 | 0.387 | 6.16E-89 | B cells | Emilin1  |
| 5.28E-93 | -1.17631 | 0.005 | 0.386 | 9.51E-89 | B cells | Mxra7    |
| 6.21E-93 | -1.52837 | 0.013 | 0.395 | 1.12E-88 | B cells | Adamts5  |

|          |          |       |       |          |         |          |
|----------|----------|-------|-------|----------|---------|----------|
| 9.50E-93 | -3.35187 | 0.092 | 0.483 | 1.71E-88 | B cells | Msrb1    |
| 1.51E-92 | -1.32909 | 0.028 | 0.416 | 2.72E-88 | B cells | Itm2a    |
| 2.15E-92 | -1.27518 | 0.012 | 0.396 | 3.87E-88 | B cells | Fbln5    |
| 2.94E-92 | -2.55692 | 0.024 | 0.405 | 5.30E-88 | B cells | Thbs1    |
| 4.14E-92 | -1.07201 | 0.005 | 0.383 | 7.46E-88 | B cells | Fgfr1    |
| 5.45E-92 | -1.03862 | 0.005 | 0.382 | 9.80E-88 | B cells | Fkbp7    |
| 5.52E-92 | -2.91346 | 0.044 | 0.428 | 9.94E-88 | B cells | Hspb1    |
| 2.23E-91 | -1.6448  | 0.009 | 0.384 | 4.01E-87 | B cells | Col8a1   |
| 2.48E-91 | -1.38817 | 0.089 | 0.499 | 4.47E-87 | B cells | Picalm   |
| 3.92E-91 | -1.2881  | 0.009 | 0.385 | 7.06E-87 | B cells | Sod3     |
| 4.02E-91 | -2.40395 | 0.527 | 0.851 | 7.24E-87 | B cells | Cebpb    |
| 4.04E-91 | -1.48059 | 0.009 | 0.383 | 7.27E-87 | B cells | Col6a3   |
| 6.11E-91 | -1.29508 | 0.001 | 0.374 | 1.10E-86 | B cells | Selenbp1 |
| 8.83E-91 | -1.02927 | 0.044 | 0.438 | 1.59E-86 | B cells | Grn      |
| 1.55E-90 | -1.28044 | 0.009 | 0.384 | 2.78E-86 | B cells | Ace      |
| 1.86E-90 | -1.52418 | 0.02  | 0.396 | 3.35E-86 | B cells | Atf5     |
| 2.35E-90 | -1.23261 | 0.005 | 0.377 | 4.23E-86 | B cells | Medag    |
| 3.25E-90 | -1.66279 | 0.005 | 0.377 | 5.86E-86 | B cells | Timp3    |
| 4.52E-90 | -1.55469 | 0.183 | 0.548 | 8.14E-86 | B cells | Zbtb20   |
| 7.52E-90 | -1.28859 | 0.297 | 0.626 | 1.35E-85 | B cells | Laptm4a  |
| 1.14E-89 | -1.09167 | 0.042 | 0.432 | 2.05E-85 | B cells | Pdlim2   |
| 1.53E-89 | -1.3301  | 0.009 | 0.381 | 2.75E-85 | B cells | Fbn1     |
| 1.71E-89 | -1.1554  | 0.008 | 0.379 | 3.09E-85 | B cells | Nav1     |
| 9.97E-89 | -2.02978 | 0.012 | 0.381 | 1.80E-84 | B cells | C3       |
| 1.09E-88 | 1.193162 | 0.337 | 0.122 | 1.95E-84 | B cells | Cerk     |
| 3.17E-88 | -1.00603 | 0.015 | 0.385 | 5.70E-84 | B cells | Rcn1     |
| 3.99E-88 | -1.48715 | 0.008 | 0.374 | 7.18E-84 | B cells | Pcolce2  |
| 9.26E-88 | -1.10457 | 0.003 | 0.366 | 1.67E-83 | B cells | Il11ral  |
| 3.51E-87 | -1.09499 | 0.07  | 0.466 | 6.31E-83 | B cells | Creg1    |
| 3.58E-87 | -1.67794 | 0.003 | 0.365 | 6.44E-83 | B cells | Tnfaip2  |
| 6.95E-87 | -1.06752 | 0.052 | 0.438 | 1.25E-82 | B cells | Calu     |
| 7.06E-87 | -1.40327 | 0.082 | 0.471 | 1.27E-82 | B cells | Phlda1   |
| 2.39E-86 | -1.12067 | 0.275 | 0.63  | 4.31E-82 | B cells | Bsg      |
| 2.57E-86 | -1.0398  | 0.001 | 0.36  | 4.62E-82 | B cells | Mmp23    |
| 3.71E-86 | -1.12    | 0.003 | 0.362 | 6.68E-82 | B cells | Aebp1    |
| 3.88E-86 | -1.09359 | 0.049 | 0.429 | 6.98E-82 | B cells | Ugp2     |
| 4.02E-86 | -1.11362 | 0.415 | 0.805 | 7.24E-82 | B cells | Pkm      |
| 4.79E-86 | -1.14946 | 0.208 | 0.585 | 8.63E-82 | B cells | Slc25a4  |
| 7.30E-86 | -1.02089 | 0.046 | 0.43  | 1.31E-81 | B cells | Vkorc1   |
| 1.13E-85 | -1.12004 | 0.012 | 0.373 | 2.03E-81 | B cells | Lama4    |
| 1.31E-85 | -1.46388 | 0.015 | 0.376 | 2.35E-81 | B cells | Hsd11b1  |
| 1.64E-85 | -1.16371 | 0.021 | 0.387 | 2.96E-81 | B cells | Socs2    |
| 2.90E-85 | -2.20944 | 0.353 | 0.65  | 5.23E-81 | B cells | Jun      |
| 4.65E-85 | -1.18373 | 0.005 | 0.361 | 8.38E-81 | B cells | Angptl2  |
| 1.19E-84 | 1.470628 | 0.524 | 0.298 | 2.15E-80 | B cells | Tcp1l12  |
| 3.81E-84 | -1.41275 | 0.007 | 0.36  | 6.86E-80 | B cells | Jdp2     |
| 1.41E-82 | -1.01052 | 0.005 | 0.354 | 2.53E-78 | B cells | Fam129a  |
| 1.44E-82 | -1.19619 | 0.005 | 0.355 | 2.58E-78 | B cells | Tm4sf1   |
| 1.86E-82 | -1.39695 | 0.338 | 0.68  | 3.35E-78 | B cells | Zfp36    |
| 1.94E-82 | -1.23204 | 0.013 | 0.365 | 3.49E-78 | B cells | Ppp1r14a |
| 2.25E-82 | -1.04199 | 0.005 | 0.354 | 4.05E-78 | B cells | Dpysl3   |
| 2.33E-82 | -1.0453  | 0.004 | 0.351 | 4.19E-78 | B cells | Vwal     |
| 3.57E-82 | -1.22935 | 0.003 | 0.348 | 6.42E-78 | B cells | Htra1    |
| 4.82E-82 | -1.57479 | 0.007 | 0.353 | 8.68E-78 | B cells | Aspn     |

|          |          |       |       |          |         |          |
|----------|----------|-------|-------|----------|---------|----------|
| 1.32E-81 | 1.005515 | 0.261 | 0.08  | 2.37E-77 | B cells | Ttpal    |
| 1.59E-81 | -1.40992 | 0.088 | 0.469 | 2.87E-77 | B cells | Nfkbiz   |
| 5.14E-81 | -1.03693 | 0.122 | 0.513 | 9.26E-77 | B cells | Myadm    |
| 8.98E-81 | -1.23315 | 0.016 | 0.363 | 1.62E-76 | B cells | Serpine2 |
| 2.22E-80 | -1.00094 | 0.02  | 0.369 | 4.00E-76 | B cells | Cavin1   |
| 8.67E-80 | 1.182033 | 0.646 | 0.471 | 1.56E-75 | B cells | Kras     |
| 1.19E-79 | -1.45374 | 0.399 | 0.735 | 2.14E-75 | B cells | Neat1    |
| 1.92E-79 | 1.262463 | 0.515 | 0.294 | 3.45E-75 | B cells | Cd55     |
| 3.05E-79 | -1.0163  | 0.06  | 0.423 | 5.50E-75 | B cells | Ras      |
| 5.23E-79 | -1.75167 | 0.032 | 0.376 | 9.41E-75 | B cells | Fgl2     |
| 6.52E-79 | -1.0199  | 0.004 | 0.34  | 1.17E-74 | B cells | Ndr2     |
| 2.35E-78 | -1.06698 | 0.004 | 0.339 | 4.23E-74 | B cells | Col4a2   |
| 3.77E-78 | -2.05876 | 0.162 | 0.498 | 6.78E-74 | B cells | Klf4     |
| 3.77E-78 | -2.93488 | 0.016 | 0.35  | 6.79E-74 | B cells | Fcer1g   |
| 3.85E-78 | -1.24654 | 0.003 | 0.336 | 6.92E-74 | B cells | Gda      |
| 5.38E-78 | -1.1705  | 0.005 | 0.34  | 9.69E-74 | B cells | Plala    |
| 1.49E-77 | -2.37112 | 0.032 | 0.369 | 2.69E-73 | B cells | Gm12840  |
| 4.20E-77 | -1.52784 | 0.013 | 0.347 | 7.56E-73 | B cells | Spon2    |
| 4.85E-77 | 1.049691 | 0.493 | 0.246 | 8.73E-73 | B cells | Cr1f3    |
| 6.23E-77 | -1.29418 | 0.007 | 0.338 | 1.12E-72 | B cells | Eln      |
| 2.41E-76 | -1.59598 | 0.057 | 0.4   | 4.33E-72 | B cells | Trib1    |
| 3.88E-76 | -1.10138 | 0.267 | 0.661 | 6.98E-72 | B cells | Ifn1     |
| 1.18E-75 | -1.31756 | 0.012 | 0.343 | 2.13E-71 | B cells | Gfpt2    |
| 1.28E-75 | -1.43373 | 0.008 | 0.334 | 2.30E-71 | B cells | Nbl1     |
| 7.25E-75 | -1.79036 | 0.267 | 0.601 | 1.31E-70 | B cells | Hspalb   |
| 9.51E-75 | -1.49028 | 0.054 | 0.401 | 1.71E-70 | B cells | Id2      |
| 1.18E-73 | -1.4812  | 0.004 | 0.323 | 2.13E-69 | B cells | Emilin2  |
| 1.64E-73 | -1.10203 | 0.003 | 0.321 | 2.96E-69 | B cells | Sfrp1    |
| 1.92E-73 | 1.119076 | 0.359 | 0.152 | 3.45E-69 | B cells | Nfatc3   |
| 4.39E-73 | -1.21883 | 0.206 | 0.54  | 7.90E-69 | B cells | Sptbn1   |
| 9.30E-73 | -1.2161  | 0.007 | 0.326 | 1.67E-68 | B cells | Gsta3    |
| 3.80E-72 | -1.05907 | 0.188 | 0.538 | 6.85E-68 | B cells | Ybx3     |
| 5.01E-72 | -1.48511 | 0.034 | 0.358 | 9.02E-68 | B cells | Glrx     |
| 5.64E-72 | 1.285236 | 0.509 | 0.315 | 1.02E-67 | B cells | Pold4    |
| 6.71E-72 | -1.10872 | 0.025 | 0.352 | 1.21E-67 | B cells | Plin2    |
| 2.91E-71 | -2.5637  | 0.032 | 0.349 | 5.24E-67 | B cells | Cxcl1    |
| 2.94E-71 | -1.10829 | 0.126 | 0.494 | 5.29E-67 | B cells | Ndel1    |
| 3.12E-71 | -1.05623 | 0.159 | 0.528 | 5.62E-67 | B cells | Dbi      |
| 7.53E-71 | -1.17859 | 0.013 | 0.327 | 1.36E-66 | B cells | Bag3     |
| 9.55E-71 | -1.06459 | 0.22  | 0.6   | 1.72E-66 | B cells | Ptp4a1   |
| 9.65E-71 | 1.03844  | 0.646 | 0.5   | 1.74E-66 | B cells | Polr1d   |
| 1.02E-70 | -1.05756 | 0.007 | 0.317 | 1.84E-66 | B cells | Fxyd6    |
| 4.86E-70 | -2.10391 | 0.015 | 0.325 | 8.75E-66 | B cells | Cyr61    |
| 2.02E-69 | -1.0893  | 0.001 | 0.305 | 3.64E-65 | B cells | Fibin    |
| 1.92E-68 | -1.05572 | 0.015 | 0.324 | 3.46E-64 | B cells | Col5a3   |
| 3.02E-68 | -2.52575 | 0.005 | 0.306 | 5.44E-64 | B cells | Slc16a3  |
| 2.26E-66 | -1.74825 | 0.101 | 0.409 | 4.06E-62 | B cells | Selplg   |
| 2.26E-66 | -1.02554 | 0.004 | 0.298 | 4.06E-62 | B cells | Gas6     |
| 4.00E-66 | -1.07168 | 0.005 | 0.301 | 7.20E-62 | B cells | Adamts1  |
| 1.76E-64 | -2.48859 | 0.013 | 0.302 | 3.17E-60 | B cells | Lst1     |
| 1.90E-64 | -2.70537 | 0.074 | 0.371 | 3.42E-60 | B cells | Mxd1     |
| 3.39E-64 | -1.08512 | 0.064 | 0.384 | 6.10E-60 | B cells | Card19   |
| 2.16E-63 | 1.082452 | 0.275 | 0.103 | 3.89E-59 | B cells | Dmx11    |
| 1.01E-62 | -1.14887 | 0.007 | 0.29  | 1.82E-58 | B cells | Tppp3    |

|          |          |       |       |          |         |               |
|----------|----------|-------|-------|----------|---------|---------------|
| 2.97E-62 | -1.5795  | 0.176 | 0.481 | 5.35E-58 | B cells | Id3           |
| 4.11E-62 | -1.66738 | 0.02  | 0.307 | 7.40E-58 | B cells | Mt2           |
| 4.11E-61 | -1.75181 | 0.013 | 0.294 | 7.41E-57 | B cells | Tgfbf         |
| 3.07E-60 | -1.03249 | 0.005 | 0.279 | 5.53E-56 | B cells | Sirpa         |
| 4.42E-60 | -1.12907 | 0.073 | 0.381 | 7.95E-56 | B cells | Uap1          |
| 5.22E-60 | -1.7337  | 0.057 | 0.35  | 9.39E-56 | B cells | Rnf149        |
| 6.68E-60 | 1.24635  | 0.455 | 0.273 | 1.20E-55 | B cells | Got1          |
| 7.89E-60 | -1.0205  | 0.007 | 0.281 | 1.42E-55 | B cells | Fmo2          |
| 1.02E-59 | -3.64903 | 0.097 | 0.366 | 1.84E-55 | B cells | Tyrbp         |
| 1.12E-59 | -1.30352 | 0.239 | 0.537 | 2.01E-55 | B cells | Fosb          |
| 1.14E-59 | -2.52194 | 0.024 | 0.297 | 2.05E-55 | B cells | Alox5ap       |
| 2.26E-59 | -1.22826 | 0.069 | 0.369 | 4.07E-55 | B cells | Nudt4         |
| 2.87E-59 | 1.128316 | 0.383 | 0.199 | 5.17E-55 | B cells | Egln2         |
| 5.34E-59 | -1.28505 | 0.007 | 0.276 | 9.62E-55 | B cells | Ackr3         |
| 5.05E-58 | -1.15066 | 0.072 | 0.368 | 9.09E-54 | B cells | Efh2          |
| 6.08E-58 | -1.23008 | 0.008 | 0.276 | 1.09E-53 | B cells | Tgm2          |
| 3.31E-57 | -1.26208 | 0.052 | 0.338 | 5.96E-53 | B cells | Ugdh          |
| 4.20E-57 | -1.10634 | 0.004 | 0.266 | 7.55E-53 | B cells | Hmx1          |
| 2.20E-56 | 1.156222 | 0.531 | 0.364 | 3.95E-52 | B cells | 4930523C07Rik |
| 2.22E-56 | -1.58506 | 0.016 | 0.279 | 4.00E-52 | B cells | Cd3e          |
| 2.34E-56 | -3.00519 | 0.02  | 0.281 | 4.21E-52 | B cells | Ccl6          |
| 6.15E-56 | -1.58287 | 0.016 | 0.278 | 1.11E-51 | B cells | Ctgf          |
| 6.78E-56 | -2.75383 | 0.005 | 0.261 | 1.22E-51 | B cells | Hp            |
| 2.50E-55 | -1.08201 | 0.013 | 0.276 | 4.50E-51 | B cells | Thy1          |
| 3.12E-54 | -1.88872 | 0.019 | 0.277 | 5.62E-50 | B cells | Isg15         |
| 5.18E-54 | -2.94698 | 0.017 | 0.272 | 9.33E-50 | B cells | Ccl2          |
| 1.14E-53 | -2.46266 | 0.008 | 0.257 | 2.06E-49 | B cells | Csf3r         |
| 1.00E-52 | 1.012032 | 0.687 | 0.589 | 1.80E-48 | B cells | Hsp1          |
| 3.32E-52 | -1.11854 | 0.024 | 0.278 | 5.98E-48 | B cells | Ly6c1         |
| 4.48E-52 | -3.4649  | 0.024 | 0.271 | 8.06E-48 | B cells | Il1b          |
| 4.69E-52 | -1.11872 | 0.267 | 0.562 | 8.43E-48 | B cells | Hspal         |
| 4.99E-52 | -2.82179 | 0.008 | 0.25  | 8.99E-48 | B cells | Hdc           |
| 1.25E-51 | -3.10286 | 0.016 | 0.259 | 2.25E-47 | B cells | Il1r2         |
| 1.09E-50 | -1.34035 | 0.414 | 0.553 | 1.96E-46 | B cells | Cd81          |
| 5.03E-50 | -6.66679 | 0.216 | 0.477 | 9.06E-46 | B cells | S100a8        |
| 5.19E-50 | -1.52129 | 0.345 | 0.661 | 9.34E-46 | B cells | Talol         |
| 1.37E-49 | -5.46505 | 0.088 | 0.337 | 2.48E-45 | B cells | Retnl         |
| 5.16E-48 | -6.86536 | 0.245 | 0.512 | 9.29E-44 | B cells | S100a9        |
| 1.90E-47 | -4.10271 | 0.081 | 0.317 | 3.43E-43 | B cells | Lyz2          |
| 3.65E-47 | -2.05444 | 0.054 | 0.291 | 6.56E-43 | B cells | Lmb1          |
| 9.98E-46 | -1.04565 | 0.033 | 0.264 | 1.80E-41 | B cells | Vsir          |
| 5.41E-45 | -1.34166 | 0.099 | 0.337 | 9.74E-41 | B cells | Emb           |
| 8.21E-45 | -1.54257 | 0.027 | 0.251 | 1.48E-40 | B cells | Stx11         |
| 1.45E-44 | -1.12857 | 0.034 | 0.265 | 2.61E-40 | B cells | Plk3          |
| 6.64E-44 | -1.46469 | 0.09  | 0.327 | 1.19E-39 | B cells | Cd44          |
| 9.12E-42 | -1.02036 | 0.182 | 0.452 | 1.64E-37 | B cells | Gadd45b       |
| 6.54E-39 | 1.073695 | 0.467 | 0.344 | 1.18E-34 | B cells | Tmem123       |
| 3.07E-38 | -1.13771 | 0.119 | 0.353 | 5.52E-34 | B cells | Gadd45g       |
| 6.85E-38 | -1.97378 | 0.086 | 0.292 | 1.23E-33 | B cells | Pglyrpl       |
| 1.47E-37 | -1.19736 | 0.106 | 0.32  | 2.65E-33 | B cells | Hcst          |
| 1.04E-34 | -1.5465  | 0.11  | 0.313 | 1.87E-30 | B cells | Lgals3        |
| 1.06E-34 | -1.06902 | 0.358 | 0.588 | 1.91E-30 | B cells | Ifi2712a      |
| 2.90E-27 | -1.23287 | 0.145 | 0.331 | 5.22E-23 | B cells | Ets2          |
| 7.04E-24 | -1.2431  | 0.138 | 0.294 | 1.27E-19 | B cells | Samsn1        |



|          |          |       |       |          |         |         |
|----------|----------|-------|-------|----------|---------|---------|
| 3.14E-23 | -1.7792  | 0.696 | 0.668 | 5.66E-19 | B cells | Hbb-bs  |
| 8.99E-23 | 1.012948 | 0.373 | 0.288 | 1.62E-18 | B cells | Foxo1   |
| 5.69E-07 | -1.00855 | 0.361 | 0.392 | 0.010235 | B cells | Lcp1    |
| 0        | 4.866536 | 0.981 | 0.102 | 0        | NKT     | Ccl5    |
| 0        | 3.444586 | 0.989 | 0.104 | 0        | NKT     | Nkg7    |
| 0        | 3.388602 | 0.845 | 0.016 | 0        | NKT     | Cd8a    |
| 0        | 3.369274 | 0.638 | 0.046 | 0        | NKT     | Gzmb    |
| 0        | 3.346079 | 0.85  | 0.022 | 0        | NKT     | Cd8b1   |
| 0        | 3.234701 | 0.968 | 0.136 | 0        | NKT     | Cd3g    |
| 0        | 2.950438 | 0.962 | 0.148 | 0        | NKT     | Ms4a4b  |
| 0        | 2.688342 | 0.725 | 0.053 | 0        | NKT     | Ctla2a  |
| 0        | 2.664026 | 0.953 | 0.139 | 0        | NKT     | Trbc2   |
| 0        | 2.614352 | 0.826 | 0.074 | 0        | NKT     | Ctsw    |
| 0        | 2.604025 | 0.907 | 0.252 | 0        | NKT     | Thy1    |
| 0        | 2.556567 | 0.549 | 0.034 | 0        | NKT     | Pdcd1   |
| 0        | 2.526412 | 0.644 | 0.035 | 0        | NKT     | Klrc1   |
| 0        | 2.522349 | 0.843 | 0.179 | 0        | NKT     | Dusp2   |
| 0        | 2.496712 | 0.864 | 0.108 | 0        | NKT     | Trac    |
| 0        | 2.488628 | 0.822 | 0.117 | 0        | NKT     | Rgs1    |
| 0        | 2.477297 | 0.657 | 0.038 | 0        | NKT     | Cxcr6   |
| 0        | 2.428367 | 0.472 | 0.03  | 0        | NKT     | Ifng    |
| 0        | 2.34486  | 0.96  | 0.254 | 0        | NKT     | Cd3e    |
| 0        | 2.327305 | 0.943 | 0.211 | 0        | NKT     | Cd3d    |
| 0        | 2.314645 | 0.873 | 0.152 | 0        | NKT     | Ms4a6b  |
| 0        | 2.214397 | 0.839 | 0.111 | 0        | NKT     | Lat     |
| 0        | 2.20947  | 0.727 | 0.114 | 0        | NKT     | Ly6c2   |
| 0        | 2.201438 | 0.799 | 0.148 | 0        | NKT     | H2-Q7   |
| 0        | 2.175917 | 0.837 | 0.131 | 0        | NKT     | Lck     |
| 0        | 2.084132 | 0.739 | 0.114 | 0        | NKT     | Cd28    |
| 0        | 1.875322 | 0.566 | 0.04  | 0        | NKT     | Klrl1   |
| 0        | 1.874198 | 0.549 | 0.065 | 0        | NKT     | Gpr183  |
| 0        | 1.858591 | 0.758 | 0.13  | 0        | NKT     | Ptpn22  |
| 0        | 1.851796 | 0.631 | 0.093 | 0        | NKT     | Sh2d2a  |
| 0        | 1.826719 | 0.528 | 0.025 | 0        | NKT     | Klrc2   |
| 0        | 1.743772 | 0.502 | 0.038 | 0        | NKT     | Fasl    |
| 0        | 1.676626 | 0.559 | 0.069 | 0        | NKT     | Icos    |
| 0        | 1.664085 | 0.532 | 0.051 | 0        | NKT     | Klrd1   |
| 0        | 1.609403 | 0.475 | 0.048 | 0        | NKT     | Epstil  |
| 0        | 1.58578  | 0.506 | 0.059 | 0        | NKT     | Cd6     |
| 0        | 1.585528 | 0.494 | 0.034 | 0        | NKT     | Cxcr3   |
| 0        | 1.515593 | 0.511 | 0.057 | 0        | NKT     | Klk8    |
| 0        | 1.479656 | 0.47  | 0.041 | 0        | NKT     | Cst7    |
| #####    | 2.394308 | 0.841 | 0.201 | #####    | NKT     | S100a4  |
| #####    | 1.060002 | 0.322 | 0.025 | #####    | NKT     | Themis  |
| #####    | 1.784496 | 0.735 | 0.139 | #####    | NKT     | Ptprcap |
| #####    | 1.519589 | 0.5   | 0.061 | #####    | NKT     | Bcl2ald |
| #####    | 1.6465   | 0.646 | 0.111 | #####    | NKT     | Skap1   |
| #####    | 1.832958 | 0.684 | 0.127 | #####    | NKT     | Bcl2alb |
| #####    | 1.02433  | 0.269 | 0.018 | #####    | NKT     | Cd226   |
| #####    | 1.539608 | 0.578 | 0.09  | #####    | NKT     | Itk     |
| #####    | 1.774806 | 0.587 | 0.094 | #####    | NKT     | Cd69    |
| #####    | 1.3677   | 0.456 | 0.056 | #####    | NKT     | Bcl11b  |
| #####    | 2.254469 | 0.718 | 0.156 | #####    | NKT     | Nr4a2   |
| #####    | 2.119448 | 0.68  | 0.128 | #####    | NKT     | Ccl4    |

|       |          |       |       |       |     |               |
|-------|----------|-------|-------|-------|-----|---------------|
| ##### | 2.00715  | 0.932 | 0.298 | ##### | NKT | Hcst          |
| ##### | 1.642521 | 0.725 | 0.143 | ##### | NKT | Cd2           |
| ##### | 1.861899 | 0.905 | 0.261 | ##### | NKT | Ptpn18        |
| ##### | 1.569595 | 0.576 | 0.096 | ##### | NKT | Cd27          |
| ##### | 1.665675 | 0.752 | 0.181 | ##### | NKT | 1-Sep         |
| ##### | 1.797359 | 0.697 | 0.157 | ##### | NKT | Hopx          |
| ##### | 2.460721 | 0.987 | 0.717 | ##### | NKT | H2-K1         |
| ##### | 1.585037 | 0.606 | 0.118 | ##### | NKT | H2-Q6         |
| ##### | 1.232081 | 0.559 | 0.09  | ##### | NKT | Il2rb         |
| ##### | 1.394598 | 0.604 | 0.111 | ##### | NKT | Dok2          |
| ##### | 1.528643 | 0.619 | 0.117 | ##### | NKT | Gimap3        |
| ##### | 2.190082 | 0.949 | 0.441 | ##### | NKT | AW112010      |
| ##### | 1.245512 | 0.417 | 0.056 | ##### | NKT | Grap2         |
| ##### | 1.35803  | 0.479 | 0.077 | ##### | NKT | Gm8369        |
| ##### | 1.53457  | 0.633 | 0.139 | ##### | NKT | Itgb7         |
| ##### | 1.094955 | 0.324 | 0.036 | ##### | NKT | Tbx21         |
| ##### | 1.372536 | 1     | 0.982 | ##### | NKT | H2-D1         |
| ##### | 1.333063 | 0.462 | 0.08  | ##### | NKT | Cd48          |
| ##### | 1.141306 | 0.456 | 0.076 | ##### | NKT | Cd247         |
| ##### | 1.145047 | 0.354 | 0.047 | ##### | NKT | Ccr5          |
| ##### | 1.1948   | 0.403 | 0.062 | ##### | NKT | Zap70         |
| ##### | 1.561697 | 0.744 | 0.224 | ##### | NKT | Tnfaip3       |
| ##### | 1.68462  | 0.831 | 0.274 | ##### | NKT | Ltb           |
| ##### | 1.843573 | 0.867 | 0.412 | ##### | NKT | Psmb8         |
| ##### | -2.09003 | 0.922 | 0.99  | ##### | NKT | Ftl1          |
| ##### | 1.672501 | 0.998 | 0.481 | ##### | NKT | Cd52          |
| ##### | 1.12914  | 0.352 | 0.048 | ##### | NKT | Ctla4         |
| ##### | 1.207376 | 0.331 | 0.044 | ##### | NKT | Gimap7        |
| ##### | 1.298884 | 0.288 | 0.034 | ##### | NKT | Serpina3g     |
| ##### | 1.249473 | 1     | 0.815 | ##### | NKT | Rps15a        |
| ##### | 1.445097 | 0.576 | 0.14  | ##### | NKT | B4galnt1      |
| ##### | 1.166264 | 1     | 0.869 | ##### | NKT | Rps13         |
| ##### | 2.394351 | 0.5   | 0.108 | ##### | NKT | Trbc1         |
| ##### | -3.32554 | 0.089 | 0.772 | ##### | NKT | Ifitm2        |
| ##### | 1.125544 | 0.998 | 0.841 | ##### | NKT | Rpl19         |
| ##### | 1.43686  | 0.82  | 0.294 | ##### | NKT | Ets1          |
| ##### | 1.541379 | 0.97  | 0.662 | ##### | NKT | S100a10       |
| ##### | 1.280462 | 0.992 | 0.905 | ##### | NKT | B2m           |
| ##### | 1.391541 | 0.934 | 0.396 | ##### | NKT | Laptm5        |
| ##### | 1.139644 | 1     | 0.867 | ##### | NKT | Rps24         |
| ##### | 1.189544 | 0.439 | 0.08  | ##### | NKT | Ccr2          |
| ##### | 1.27343  | 0.508 | 0.108 | ##### | NKT | Gimap4        |
| ##### | 1.355591 | 0.983 | 0.451 | ##### | NKT | Rac2          |
| ##### | 1.064705 | 1     | 0.869 | ##### | NKT | Rps3          |
| ##### | 1.04436  | 0.375 | 0.065 | ##### | NKT | Rasal3        |
| ##### | 1.157221 | 0.356 | 0.058 | ##### | NKT | Il21r         |
| ##### | -3.00324 | 0.475 | 0.853 | ##### | NKT | Cst3          |
| ##### | -3.37004 | 0.093 | 0.724 | ##### | NKT | Ifitm3        |
| ##### | 1.043467 | 1     | 0.898 | ##### | NKT | Rps10         |
| ##### | 1.063443 | 0.998 | 0.851 | ##### | NKT | Rps11         |
| ##### | 1.042527 | 0.379 | 0.068 | ##### | NKT | Traf1         |
| ##### | 1.016478 | 0.28  | 0.039 | ##### | NKT | Phf11b        |
| ##### | 1.11661  | 0.388 | 0.071 | ##### | NKT | 1700097N02Rik |
| ##### | 1.713698 | 0.583 | 0.174 | ##### | NKT | Gramd3        |

|          |          |       |       |          |     |          |
|----------|----------|-------|-------|----------|-----|----------|
| #####    | 1.071327 | 0.331 | 0.053 | #####    | NKT | Gpr171   |
| #####    | 1.205695 | 0.542 | 0.133 | #####    | NKT | Gimap1   |
| #####    | 1.236516 | 0.364 | 0.066 | #####    | NKT | Tagap    |
| #####    | 1.144946 | 0.398 | 0.077 | #####    | NKT | Runx3    |
| #####    | 1.388037 | 0.873 | 0.511 | #####    | NKT | Mbnl1    |
| #####    | 1.31214  | 0.65  | 0.202 | #####    | NKT | Dusp5    |
| #####    | 1.132088 | 0.992 | 0.788 | #####    | NKT | Rpl27    |
| #####    | 1.357858 | 0.555 | 0.16  | #####    | NKT | Gng2     |
| #####    | 1.221346 | 0.9   | 0.387 | #####    | NKT | Selplg   |
| #####    | -2.62397 | 0.011 | 0.649 | #####    | NKT | Aldh2    |
| #####    | 1.124356 | 0.398 | 0.081 | #####    | NKT | Slpr4    |
| #####    | 1.385747 | 0.926 | 0.686 | #####    | NKT | Shisa5   |
| #####    | 1.065627 | 0.394 | 0.083 | #####    | NKT | Acp5     |
| #####    | -2.58855 | 0.047 | 0.658 | #####    | NKT | Timp2    |
| #####    | 1.189161 | 0.278 | 0.045 | #####    | NKT | Abcb1b   |
| #####    | 1.166252 | 1     | 0.764 | #####    | NKT | Tmsb10   |
| #####    | 1.167536 | 0.422 | 0.098 | #####    | NKT | Itga4    |
| #####    | 1.561203 | 0.782 | 0.38  | #####    | NKT | Id2      |
| #####    | -4.1197  | 0.123 | 0.667 | #####    | NKT | Cebpd    |
| #####    | 1.319374 | 0.636 | 0.243 | #####    | NKT | Psmb9    |
| #####    | 1.039067 | 0.411 | 0.093 | #####    | NKT | Rhoh     |
| #####    | -2.96618 | 0.023 | 0.614 | #####    | NKT | Cd63     |
| #####    | 1.038463 | 0.513 | 0.141 | #####    | NKT | Tbc1d10c |
| #####    | -5.63854 | 0.396 | 0.779 | #####    | NKT | Gsn      |
| #####    | 1.451364 | 0.907 | 0.628 | #####    | NKT | Zfp3612  |
| #####    | 1.090364 | 0.633 | 0.208 | #####    | NKT | Itgal    |
| #####    | 1.1197   | 0.934 | 0.755 | #####    | NKT | Pabpc1   |
| #####    | 1.195126 | 0.888 | 0.585 | #####    | NKT | Sub1     |
| #####    | -2.66195 | 0.051 | 0.614 | #####    | NKT | Cd9      |
| #####    | 1.222841 | 0.922 | 0.715 | #####    | NKT | Sh3bgrl3 |
| #####    | -2.95591 | 0.036 | 0.589 | #####    | NKT | Ctsl     |
| #####    | 1.126814 | 0.792 | 0.341 | #####    | NKT | Vps37b   |
| #####    | -3.2009  | 0.059 | 0.594 | #####    | NKT | Pi16     |
| #####    | -2.35416 | 0.049 | 0.589 | 1.61E-99 | NKT | Selenop  |
| #####    | 1.255135 | 0.845 | 0.486 | 3.69E-99 | NKT | Ucp2     |
| #####    | 1.005468 | 0.432 | 0.112 | 6.66E-99 | NKT | Il2rg    |
| #####    | -2.22892 | 0.157 | 0.679 | 1.19E-97 | NKT | Zfp36    |
| #####    | -1.92803 | 0.008 | 0.552 | 4.00E-97 | NKT | App      |
| #####    | 1.163454 | 0.447 | 0.133 | 6.98E-97 | NKT | Tap1     |
| #####    | -2.14532 | 0.011 | 0.555 | 9.66E-97 | NKT | Mgst1    |
| #####    | 1.243121 | 0.627 | 0.263 | 1.20E-95 | NKT | Zdhhc18  |
| #####    | -2.7283  | 0.021 | 0.555 | 1.70E-95 | NKT | Crispld2 |
| 2.40E-99 | -2.87122 | 0.036 | 0.56  | 4.32E-95 | NKT | Cd81     |
| 6.06E-96 | -2.87543 | 0.038 | 0.552 | 1.09E-91 | NKT | Igfbp4   |
| 1.96E-94 | -1.90054 | 0.006 | 0.527 | 3.53E-90 | NKT | Marcks   |
| 4.09E-94 | -4.27754 | 0.106 | 0.582 | 7.36E-90 | NKT | Igfbp7   |
| 7.00E-94 | 1.144344 | 0.456 | 0.146 | 1.26E-89 | NKT | Grap     |
| 1.41E-92 | -3.73947 | 0.047 | 0.543 | 2.54E-88 | NKT | Sparcl1  |
| 2.23E-92 | -2.37053 | 0.044 | 0.547 | 4.02E-88 | NKT | Zbtb20   |
| 1.25E-91 | -3.46149 | 0.023 | 0.525 | 2.26E-87 | NKT | Serping1 |
| 1.86E-91 | -4.09732 | 0.07  | 0.553 | 3.35E-87 | NKT | Bgn      |
| 2.94E-91 | -2.44279 | 0.015 | 0.521 | 5.30E-87 | NKT | Gstm1    |
| 6.39E-91 | 1.009645 | 0.625 | 0.232 | 1.15E-86 | NKT | Fyb      |
| 1.62E-89 | -3.41607 | 0.042 | 0.532 | 2.91E-85 | NKT | Lum      |

|          |          |       |       |          |     |            |
|----------|----------|-------|-------|----------|-----|------------|
| 3.74E-89 | -3.71747 | 0.064 | 0.544 | 6.73E-85 | NKT | Htra3      |
| 8.05E-89 | -3.63784 | 0.036 | 0.524 | 1.45E-84 | NKT | Clec3b     |
| 1.25E-88 | -3.93197 | 0.059 | 0.538 | 2.25E-84 | NKT | Sparc      |
| 3.24E-88 | -5.57157 | 0.267 | 0.65  | 5.83E-84 | NKT | Dcn        |
| 5.34E-88 | -2.47721 | 0.019 | 0.513 | 9.61E-84 | NKT | Rarres2    |
| 1.40E-87 | -3.16791 | 0.025 | 0.514 | 2.52E-83 | NKT | Gpx3       |
| 4.55E-87 | -2.06111 | 0.165 | 0.631 | 8.19E-83 | NKT | Rhob       |
| 9.48E-87 | -1.46226 | 0.472 | 0.81  | 1.71E-82 | NKT | Psap       |
| 1.87E-86 | -2.73255 | 0.03  | 0.513 | 3.37E-82 | NKT | Cygb       |
| 4.12E-86 | -4.55948 | 0.136 | 0.579 | 7.42E-82 | NKT | Mgp        |
| 4.75E-86 | -3.0966  | 0.03  | 0.523 | 8.56E-82 | NKT | G0s2       |
| 6.21E-86 | -3.25487 | 0.036 | 0.514 | 1.12E-81 | NKT | Colla2     |
| 7.42E-86 | -2.14793 | 0.011 | 0.499 | 1.33E-81 | NKT | Lhfp       |
| 8.02E-86 | -2.89895 | 0.032 | 0.513 | 1.44E-81 | NKT | Pcolce     |
| 8.96E-86 | -1.90752 | 0.119 | 0.607 | 1.61E-81 | NKT | Anxa1      |
| 1.71E-84 | -2.05065 | 0.015 | 0.497 | 3.09E-80 | NKT | Lrp1       |
| 2.52E-84 | -3.14567 | 0.023 | 0.5   | 4.53E-80 | NKT | Colla1     |
| 3.19E-84 | -1.44583 | 0.102 | 0.591 | 5.73E-80 | NKT | Lamp2      |
| 4.47E-84 | -2.86924 | 0.061 | 0.524 | 8.05E-80 | NKT | Ltbp4      |
| 5.69E-84 | -3.15086 | 0.025 | 0.5   | 1.02E-79 | NKT | Serpinh1   |
| 1.54E-83 | 1.198653 | 0.708 | 0.405 | 2.77E-79 | NKT | Abrac1     |
| 2.52E-83 | -2.55557 | 0.475 | 0.783 | 4.54E-79 | NKT | Fos        |
| 3.75E-83 | -1.89775 | 0.068 | 0.539 | 6.75E-79 | NKT | Sptbn1     |
| 5.51E-83 | -2.51424 | 0.023 | 0.497 | 9.92E-79 | NKT | Cd34       |
| 1.47E-82 | -2.49374 | 0.008 | 0.484 | 2.64E-78 | NKT | Serpinf1   |
| 4.21E-82 | -2.08308 | 0.006 | 0.482 | 7.58E-78 | NKT | Pmp22      |
| 7.92E-82 | -2.56458 | 0.017 | 0.487 | 1.43E-77 | NKT | Col6a1     |
| 1.13E-81 | -1.84928 | 0.03  | 0.502 | 2.03E-77 | NKT | Rnase4     |
| 1.15E-81 | -2.42915 | 0.028 | 0.494 | 2.07E-77 | NKT | Mmp2       |
| 1.62E-81 | -3.57303 | 0.021 | 0.49  | 2.91E-77 | NKT | Lpl        |
| 4.27E-81 | -3.49628 | 0.057 | 0.512 | 7.68E-77 | NKT | Col3a1     |
| 8.51E-81 | -1.87906 | 0.019 | 0.487 | 1.53E-76 | NKT | Tcf4       |
| 9.86E-81 | 1.082888 | 0.5   | 0.182 | 1.78E-76 | NKT | D16Ert472e |
| 1.16E-80 | -3.02512 | 0.03  | 0.494 | 2.09E-76 | NKT | Fbln1      |
| 1.97E-80 | -2.48067 | 0.011 | 0.476 | 3.55E-76 | NKT | Col6a2     |
| 2.06E-80 | -2.46233 | 0.008 | 0.476 | 3.71E-76 | NKT | Fbln2      |
| 3.11E-80 | -1.74121 | 0.013 | 0.481 | 5.60E-76 | NKT | Cd302      |
| 3.16E-80 | -2.51404 | 0.008 | 0.475 | 5.68E-76 | NKT | Ccdc80     |
| 4.78E-80 | -2.45242 | 0.025 | 0.49  | 8.60E-76 | NKT | Cfh        |
| 1.48E-79 | -2.30693 | 0.015 | 0.477 | 2.67E-75 | NKT | Fstl1      |
| 6.59E-79 | -2.00481 | 0.008 | 0.47  | 1.19E-74 | NKT | Nfix       |
| 3.36E-78 | -2.15816 | 0.028 | 0.484 | 6.04E-74 | NKT | Dpt        |
| 7.67E-78 | -2.17054 | 0.013 | 0.469 | 1.38E-73 | NKT | Nid1       |
| 1.52E-77 | -1.99172 | 0.013 | 0.471 | 2.73E-73 | NKT | Rbp1       |
| 1.94E-77 | -2.46273 | 0.011 | 0.465 | 3.50E-73 | NKT | Coll5a1    |
| 2.07E-77 | 1.03885  | 0.434 | 0.153 | 3.73E-73 | NKT | 6-Sep      |
| 8.85E-77 | -1.78969 | 0.011 | 0.466 | 1.59E-72 | NKT | Sdc2       |
| 2.34E-76 | -1.80518 | 0.517 | 0.831 | 4.22E-72 | NKT | Dusp1      |
| 6.97E-76 | -2.0023  | 0.013 | 0.462 | 1.26E-71 | NKT | Hspg2      |
| 9.49E-76 | 1.236555 | 0.47  | 0.177 | 1.71E-71 | NKT | Sipa1l1    |
| 1.02E-75 | -1.63748 | 0.242 | 0.622 | 1.83E-71 | NKT | Laptm4a    |
| 1.26E-75 | -1.83408 | 0.061 | 0.505 | 2.27E-71 | NKT | Selenom    |
| 1.58E-75 | -1.43277 | 0.049 | 0.509 | 2.84E-71 | NKT | Myadm      |
| 1.70E-75 | 1.175463 | 0.701 | 0.435 | 3.07E-71 | NKT | Saraf      |

|          |          |       |       |          |     |         |
|----------|----------|-------|-------|----------|-----|---------|
| 6.27E-75 | -1.63544 | 0.049 | 0.498 | 1.13E-70 | NKT | Nenf    |
| 1.10E-74 | -2.56759 | 0.028 | 0.47  | 1.97E-70 | NKT | Smoc2   |
| 1.10E-74 | -2.3298  | 0.034 | 0.48  | 1.98E-70 | NKT | Atf3    |
| 1.53E-74 | -1.67751 | 0.008 | 0.458 | 2.75E-70 | NKT | Nfib    |
| 1.74E-74 | -1.87121 | 0.013 | 0.458 | 3.13E-70 | NKT | Loxl1   |
| 5.37E-74 | -2.01356 | 0.008 | 0.451 | 9.66E-70 | NKT | Col4a1  |
| 5.55E-73 | -1.62872 | 0.011 | 0.45  | 9.98E-69 | NKT | Rhoj    |
| 9.43E-73 | -2.88245 | 0.163 | 0.555 | 1.70E-68 | NKT | Egr1    |
| 1.19E-72 | -1.83536 | 0.015 | 0.454 | 2.14E-68 | NKT | Prelp   |
| 1.66E-72 | -1.8973  | 0.038 | 0.476 | 3.00E-68 | NKT | Axl     |
| 2.27E-72 | -1.68086 | 0.019 | 0.46  | 4.09E-68 | NKT | Mxra8   |
| 2.29E-72 | -1.94543 | 0.004 | 0.44  | 4.13E-68 | NKT | Pcsk6   |
| 2.30E-72 | -1.73913 | 0.006 | 0.443 | 4.14E-68 | NKT | Gpm6b   |
| 2.33E-72 | -1.74609 | 0.017 | 0.455 | 4.20E-68 | NKT | Abca8a  |
| 9.50E-72 | 1.002124 | 0.843 | 0.642 | 1.71E-67 | NKT | Ifngr1  |
| 3.61E-71 | -1.80589 | 0.021 | 0.451 | 6.49E-67 | NKT | Tnxb    |
| 4.69E-71 | -1.83838 | 0.013 | 0.444 | 8.44E-67 | NKT | Plpp3   |
| 6.28E-71 | -1.64795 | 0.038 | 0.47  | 1.13E-66 | NKT | Rcn3    |
| 1.04E-70 | -3.78405 | 0.144 | 0.547 | 1.87E-66 | NKT | Mt1     |
| 1.13E-70 | 1.022167 | 0.767 | 0.566 | 2.03E-66 | NKT | Cox5a   |
| 3.59E-70 | -2.08315 | 0.013 | 0.441 | 6.46E-66 | NKT | Gas1    |
| 5.21E-70 | -1.56278 | 0.013 | 0.44  | 9.37E-66 | NKT | Cpq     |
| 2.08E-69 | -1.7293  | 0.032 | 0.462 | 3.74E-65 | NKT | Slc43a3 |
| 1.26E-68 | 1.072046 | 0.544 | 0.237 | 2.26E-64 | NKT | Itpkb   |
| 1.96E-68 | -1.88043 | 0.03  | 0.452 | 3.53E-64 | NKT | Ecml    |
| 2.55E-68 | -2.50425 | 0.081 | 0.495 | 4.58E-64 | NKT | Klf4    |
| 3.04E-68 | -1.32326 | 0.095 | 0.528 | 5.47E-64 | NKT | Dstn    |
| 3.45E-68 | -1.43082 | 0.004 | 0.425 | 6.21E-64 | NKT | Bicc1   |
| 3.53E-68 | -2.69631 | 0.564 | 0.846 | 6.36E-64 | NKT | Cebpb   |
| 6.12E-68 | -1.3481  | 0.028 | 0.452 | 1.10E-63 | NKT | Fcgrt   |
| 6.55E-68 | 1.03438  | 0.591 | 0.294 | 1.18E-63 | NKT | Sp100   |
| 6.86E-68 | -1.67093 | 0.07  | 0.494 | 1.23E-63 | NKT | Klf9    |
| 8.45E-68 | -1.77814 | 0.013 | 0.43  | 1.52E-63 | NKT | Lamb1   |
| 1.09E-67 | -1.60619 | 0.013 | 0.432 | 1.95E-63 | NKT | Olfml3  |
| 1.13E-67 | -2.67198 | 0.307 | 0.647 | 2.03E-63 | NKT | Jun     |
| 1.21E-67 | 1.055069 | 0.39  | 0.139 | 2.17E-63 | NKT | H2-T22  |
| 1.35E-67 | -2.17462 | 0.059 | 0.479 | 2.43E-63 | NKT | Id3     |
| 1.59E-67 | 1.039593 | 0.612 | 0.312 | 2.87E-63 | NKT | Zc3hav1 |
| 1.98E-67 | -1.44502 | 0     | 0.414 | 3.56E-63 | NKT | Lama2   |
| 2.35E-67 | -1.82816 | 0.112 | 0.527 | 4.23E-63 | NKT | Cdkn1a  |
| 2.88E-67 | -1.62437 | 0.008 | 0.424 | 5.19E-63 | NKT | Tcf21   |
| 4.63E-67 | -1.52232 | 0.006 | 0.42  | 8.33E-63 | NKT | Ptgis   |
| 1.37E-66 | -1.47603 | 0.008 | 0.42  | 2.47E-62 | NKT | Plxdc2  |
| 2.02E-66 | -1.6426  | 0.017 | 0.435 | 3.63E-62 | NKT | Ebf1    |
| 3.14E-66 | -1.47038 | 0.008 | 0.421 | 5.65E-62 | NKT | Cavin3  |
| 7.92E-66 | -1.39796 | 0.008 | 0.418 | 1.43E-61 | NKT | Ddah2   |
| 1.16E-65 | -1.34726 | 0.019 | 0.434 | 2.08E-61 | NKT | Fxyd1   |
| 2.53E-65 | -1.24894 | 0.163 | 0.584 | 4.55E-61 | NKT | Ctsz    |
| 7.12E-65 | -1.69459 | 0.008 | 0.413 | 1.28E-60 | NKT | Islr    |
| 1.09E-64 | -1.64254 | 0.068 | 0.476 | 1.97E-60 | NKT | Lamc1   |
| 1.78E-64 | -1.48178 | 0.015 | 0.419 | 3.21E-60 | NKT | Nupr1   |
| 1.96E-64 | -1.41284 | 0.051 | 0.463 | 3.53E-60 | NKT | Rhoc    |
| 2.06E-64 | -1.70131 | 0.061 | 0.471 | 3.71E-60 | NKT | Crip2   |
| 2.43E-64 | -1.45491 | 0.419 | 0.773 | 4.37E-60 | NKT | Sat1    |

|          |          |       |       |          |     |          |
|----------|----------|-------|-------|----------|-----|----------|
| 3.43E-64 | 1.106886 | 0.684 | 0.46  | 6.18E-60 | NKT | H2afy    |
| 5.68E-64 | -1.25183 | 0.006 | 0.407 | 1.02E-59 | NKT | S100a16  |
| 8.46E-64 | -1.9637  | 0.023 | 0.424 | 1.52E-59 | NKT | Ckb      |
| 8.62E-64 | -1.52217 | 0.008 | 0.408 | 1.55E-59 | NKT | Oaf      |
| 1.07E-63 | -1.31042 | 0.004 | 0.403 | 1.93E-59 | NKT | Nfia     |
| 3.18E-63 | -1.4945  | 0.008 | 0.407 | 5.72E-59 | NKT | Ramp2    |
| 3.18E-63 | -2.47962 | 0.036 | 0.432 | 5.73E-59 | NKT | Mfap5    |
| 1.03E-62 | -1.36551 | 0.006 | 0.402 | 1.86E-58 | NKT | Col5a1   |
| 1.04E-62 | -1.50577 | 0.008 | 0.405 | 1.87E-58 | NKT | Pam      |
| 1.31E-62 | -1.75818 | 0.015 | 0.411 | 2.36E-58 | NKT | Ogn      |
| 1.41E-62 | 1.047968 | 0.693 | 0.476 | 2.55E-58 | NKT | Psmel    |
| 2.13E-62 | -1.25382 | 0.008 | 0.405 | 3.83E-58 | NKT | Itgb5    |
| 4.95E-62 | -1.31613 | 0.006 | 0.399 | 8.92E-58 | NKT | Entpd2   |
| 1.00E-61 | -1.2363  | 0.004 | 0.395 | 1.81E-57 | NKT | Cald1    |
| 1.27E-61 | 1.023636 | 0.697 | 0.424 | 2.28E-57 | NKT | H2-Q4    |
| 3.23E-61 | -1.15905 | 0.008 | 0.401 | 5.82E-57 | NKT | Fkbp9    |
| 4.12E-61 | -1.25088 | 0.011 | 0.401 | 7.41E-57 | NKT | Pdgfra   |
| 8.50E-61 | -1.35724 | 0.004 | 0.391 | 1.53E-56 | NKT | Fbln5    |
| 1.20E-60 | -1.27297 | 0.011 | 0.401 | 2.15E-56 | NKT | Fhl1     |
| 1.36E-60 | -1.20275 | 0.11  | 0.535 | 2.45E-56 | NKT | Tnfrsfla |
| 2.61E-60 | -1.29055 | 0.04  | 0.434 | 4.70E-56 | NKT | Nfic     |
| 3.33E-60 | -1.33295 | 0.011 | 0.395 | 5.99E-56 | NKT | Adamts2  |
| 4.02E-60 | -1.54965 | 0.006 | 0.39  | 7.24E-56 | NKT | Adamts5  |
| 5.04E-60 | -1.29263 | 0.006 | 0.391 | 9.07E-56 | NKT | Col5a2   |
| 6.10E-60 | -1.54165 | 0.032 | 0.424 | 1.10E-55 | NKT | Spry1    |
| 7.55E-60 | -1.14453 | 0.002 | 0.384 | 1.36E-55 | NKT | Fermt2   |
| 1.06E-59 | -1.18045 | 0.015 | 0.401 | 1.90E-55 | NKT | Pkd2     |
| 3.36E-59 | -1.18339 | 0.002 | 0.381 | 6.04E-55 | NKT | Mxra7    |
| 4.20E-59 | -1.0566  | 0     | 0.377 | 7.56E-55 | NKT | Fkbp7    |
| 5.46E-59 | -1.65829 | 0.002 | 0.379 | 9.83E-55 | NKT | Col8a1   |
| 6.49E-59 | -3.06698 | 0.042 | 0.423 | 1.17E-54 | NKT | Hspb1    |
| 6.80E-59 | -1.0548  | 0.004 | 0.382 | 1.22E-54 | NKT | Ckap4    |
| 1.42E-58 | -1.14808 | 0.996 | 0.996 | 2.56E-54 | NKT | Fth1     |
| 1.54E-58 | -1.18525 | 0     | 0.374 | 2.77E-54 | NKT | Nav1     |
| 1.57E-58 | -2.24019 | 0.019 | 0.396 | 2.83E-54 | NKT | Dpep1    |
| 2.17E-58 | -1.30294 | 0.004 | 0.379 | 3.90E-54 | NKT | Ace      |
| 2.43E-58 | -1.64271 | 0.333 | 0.612 | 4.37E-54 | NKT | Anxa5    |
| 2.95E-58 | -1.35517 | 0.002 | 0.376 | 5.31E-54 | NKT | Fbn1     |
| 3.05E-58 | -1.23941 | 0.006 | 0.382 | 5.49E-54 | NKT | Emilin1  |
| 7.64E-58 | -2.27976 | 0.019 | 0.393 | 1.38E-53 | NKT | Meg3     |
| 7.75E-58 | -1.20163 | 0.328 | 0.642 | 1.39E-53 | NKT | Lamp1    |
| 1.07E-57 | -1.0709  | 0.006 | 0.378 | 1.92E-53 | NKT | Fgfr1    |
| 1.79E-57 | -1.4661  | 0.006 | 0.378 | 3.23E-53 | NKT | Col6a3   |
| 2.23E-57 | -1.67293 | 0.002 | 0.372 | 4.02E-53 | NKT | Timp3    |
| 2.53E-57 | -1.23322 | 0.002 | 0.372 | 4.55E-53 | NKT | Medag    |
| 7.97E-57 | -1.29078 | 0.002 | 0.369 | 1.43E-52 | NKT | Selenbp1 |
| 1.39E-56 | 1.020365 | 0.415 | 0.172 | 2.51E-52 | NKT | Cbx4     |
| 1.59E-56 | -2.53911 | 0.03  | 0.399 | 2.85E-52 | NKT | Thbs1    |
| 2.39E-56 | -1.02934 | 0.002 | 0.367 | 4.30E-52 | NKT | Cnn3     |
| 4.50E-56 | -3.30021 | 0.057 | 0.422 | 8.10E-52 | NKT | Apoe     |
| 5.52E-56 | -1.14769 | 0.004 | 0.369 | 9.94E-52 | NKT | Lama4    |
| 1.07E-55 | -1.01845 | 0.002 | 0.364 | 1.93E-51 | NKT | P3h3     |
| 1.26E-55 | -1.51899 | 0.413 | 0.73  | 2.26E-51 | NKT | Neat1    |
| 1.58E-55 | -1.23742 | 0.013 | 0.379 | 2.84E-51 | NKT | Sod3     |

|          |          |       |       |          |     |          |
|----------|----------|-------|-------|----------|-----|----------|
| 3.43E-55 | -1.06378 | 0.004 | 0.365 | 6.18E-51 | NKT | Cavin1   |
| 4.47E-55 | -1.47838 | 0.008 | 0.369 | 8.05E-51 | NKT | Pcolce2  |
| 1.53E-54 | -1.70966 | 0.032 | 0.396 | 2.75E-50 | NKT | Trib1    |
| 1.83E-54 | -1.03655 | 0     | 0.355 | 3.29E-50 | NKT | Mmp23    |
| 2.05E-54 | -1.07509 | 0.07  | 0.46  | 3.69E-50 | NKT | Creg1    |
| 2.27E-54 | -1.26326 | 0.004 | 0.361 | 4.08E-50 | NKT | Ppplr14a |
| 2.59E-54 | -1.13055 | 0.002 | 0.357 | 4.67E-50 | NKT | Aebp1    |
| 6.91E-54 | -1.47192 | 0.03  | 0.39  | 1.24E-49 | NKT | Atf5     |
| 7.10E-54 | -1.07927 | 0.083 | 0.471 | 1.28E-49 | NKT | Lmo4     |
| 1.26E-53 | -3.2999  | 0.11  | 0.477 | 2.27E-49 | NKT | Msrbl    |
| 1.32E-53 | -1.6778  | 0.006 | 0.36  | 2.37E-49 | NKT | Tnfaip2  |
| 1.34E-53 | -1.4794  | 0.227 | 0.546 | 2.40E-49 | NKT | Mtchl    |
| 1.79E-53 | -1.27529 | 0.006 | 0.359 | 3.22E-49 | NKT | Serpine2 |
| 2.12E-53 | -1.32607 | 0.239 | 0.574 | 3.82E-49 | NKT | Cyb5a    |
| 2.56E-53 | -1.05877 | 0     | 0.349 | 4.61E-49 | NKT | Dpysl3   |
| 5.69E-53 | -1.24228 | 0.106 | 0.471 | 1.02E-48 | NKT | Nedd4    |
| 1.76E-52 | -1.98303 | 0.025 | 0.376 | 3.17E-48 | NKT | C3       |
| 2.36E-52 | -1.02505 | 0.055 | 0.424 | 4.25E-48 | NKT | Vkorcl   |
| 2.60E-52 | -1.21371 | 0.004 | 0.35  | 4.68E-48 | NKT | Tm4sf1   |
| 3.41E-52 | -1.08546 | 0.057 | 0.418 | 6.13E-48 | NKT | Rras     |
| 5.89E-52 | -1.03356 | 0.011 | 0.361 | 1.06E-47 | NKT | Il1lral  |
| 1.96E-51 | -1.14292 | 0.011 | 0.356 | 3.53E-47 | NKT | Angptl2  |
| 8.94E-51 | -1.1414  | 0.178 | 0.568 | 1.61E-46 | NKT | Ctnnb1   |
| 1.86E-50 | -1.55266 | 0.011 | 0.348 | 3.35E-46 | NKT | Aspn     |
| 1.89E-50 | -1.0712  | 0.496 | 0.763 | 3.41E-46 | NKT | Anxa2    |
| 2.30E-50 | -1.0769  | 0     | 0.334 | 4.14E-46 | NKT | Col4a2   |
| 2.97E-50 | -1.55708 | 0.006 | 0.342 | 5.35E-46 | NKT | Spon2    |
| 3.67E-50 | -1.01946 | 0.008 | 0.346 | 6.60E-46 | NKT | Vwal     |
| 3.75E-50 | -1.19056 | 0.006 | 0.343 | 6.76E-46 | NKT | Htral    |
| 8.67E-50 | -1.35329 | 0.004 | 0.338 | 1.56E-45 | NKT | Gfpt2    |
| 9.18E-50 | -1.29292 | 0.331 | 0.695 | 1.65E-45 | NKT | Gpx1     |
| 3.30E-49 | -1.16639 | 0.004 | 0.335 | 5.94E-45 | NKT | Plala    |
| 3.55E-49 | -1.45952 | 0.093 | 0.451 | 6.40E-45 | NKT | Ier3     |
| 7.73E-49 | -1.29383 | 0.004 | 0.333 | 1.39E-44 | NKT | Eln      |
| 1.39E-48 | -1.00424 | 0.076 | 0.432 | 2.50E-44 | NKT | Calu     |
| 2.90E-48 | -1.01317 | 0.214 | 0.601 | 5.22E-44 | NKT | Ppplr2   |
| 3.87E-48 | -1.99505 | 0.216 | 0.526 | 6.97E-44 | NKT | Socs3    |
| 6.09E-48 | 1.115502 | 0.655 | 0.465 | 1.10E-43 | NKT | Slc3a2   |
| 6.48E-48 | -1.06876 | 0.04  | 0.381 | 1.17E-43 | NKT | Socs2    |
| 7.89E-48 | -2.64329 | 0.019 | 0.345 | 1.42E-43 | NKT | Cxcl1    |
| 8.38E-48 | -1.26144 | 0     | 0.321 | 1.51E-43 | NKT | Gsta3    |
| 1.25E-47 | -1.41929 | 0.006 | 0.329 | 2.25E-43 | NKT | Nbl1     |
| 2.96E-47 | 1.250841 | 0.644 | 0.454 | 5.33E-43 | NKT | Ubalcl2  |
| 3.08E-47 | -1.04843 | 0.159 | 0.506 | 5.55E-43 | NKT | Tmed3    |
| 3.99E-47 | -1.20625 | 0.008 | 0.331 | 7.18E-43 | NKT | Gda      |
| 1.00E-46 | -2.90865 | 0.028 | 0.345 | 1.81E-42 | NKT | Fcer1g   |
| 2.01E-46 | -3.8916  | 0.049 | 0.363 | 3.62E-42 | NKT | Tyrobp   |
| 3.69E-46 | -1.08745 | 0.002 | 0.317 | 6.65E-42 | NKT | Sfrpl    |
| 6.67E-46 | -1.21992 | 0.121 | 0.459 | 1.20E-41 | NKT | Emp1     |
| 1.05E-45 | -1.11453 | 0.006 | 0.32  | 1.89E-41 | NKT | Col5a3   |
| 6.58E-45 | -1.05051 | 0.004 | 0.313 | 1.18E-40 | NKT | Fxyd6    |
| 1.30E-44 | -2.12157 | 0.013 | 0.321 | 2.35E-40 | NKT | Cyr61    |
| 3.37E-44 | -1.33654 | 0.114 | 0.447 | 6.06E-40 | NKT | Errfil   |
| 5.38E-44 | -1.40387 | 0.011 | 0.318 | 9.69E-40 | NKT | Emilin2  |

|          |          |       |       |          |     |          |
|----------|----------|-------|-------|----------|-----|----------|
| 2.37E-43 | -1.07749 | 0.002 | 0.301 | 4.26E-39 | NKT | Fibin    |
| 1.22E-42 | -1.49044 | 0.292 | 0.651 | 2.21E-38 | NKT | Litaf    |
| 2.74E-42 | -1.19733 | 0.04  | 0.355 | 4.94E-38 | NKT | Jdp2     |
| 5.91E-42 | -1.08681 | 0.004 | 0.297 | 1.06E-37 | NKT | Adamts1  |
| 6.80E-42 | -2.17666 | 0.021 | 0.318 | 1.22E-37 | NKT | Plaur    |
| 8.11E-42 | 1.044775 | 0.331 | 0.137 | 1.46E-37 | NKT | Serpinb9 |
| 1.21E-41 | -1.3877  | 0.451 | 0.643 | 2.18E-37 | NKT | Tubal1   |
| 1.22E-41 | -1.01758 | 0.144 | 0.498 | 2.20E-37 | NKT | Klf3     |
| 1.75E-41 | -1.01121 | 0.004 | 0.294 | 3.15E-37 | NKT | Gas6     |
| 3.55E-41 | -1.20252 | 0.142 | 0.465 | 6.40E-37 | NKT | Phlda1   |
| 4.90E-41 | -1.06633 | 0.04  | 0.347 | 8.83E-37 | NKT | Plin2    |
| 8.37E-41 | -1.11406 | 0.025 | 0.322 | 1.51E-36 | NKT | Bag3     |
| 2.07E-40 | -2.61759 | 0.011 | 0.294 | 3.72E-36 | NKT | Alox5ap  |
| 7.24E-40 | -1.69602 | 0.017 | 0.303 | 1.30E-35 | NKT | Mt2      |
| 7.59E-40 | -1.05031 | 0.097 | 0.409 | 1.37E-35 | NKT | Itm2a    |
| 2.37E-39 | -1.04495 | 0     | 0.276 | 4.27E-35 | NKT | Sirpa    |
| 1.65E-38 | -1.13795 | 0.011 | 0.286 | 2.97E-34 | NKT | Tppp3    |
| 1.71E-38 | -1.0355  | 0.004 | 0.277 | 3.08E-34 | NKT | Fmo2     |
| 2.02E-38 | -1.08142 | 0.159 | 0.488 | 3.63E-34 | NKT | Ndel1    |
| 2.80E-38 | -1.29386 | 0.002 | 0.273 | 5.05E-34 | NKT | Ackr3    |
| 4.02E-38 | -1.1207  | 0.057 | 0.35  | 7.24E-34 | NKT | Gadd45a  |
| 4.47E-38 | -1.7379  | 0.015 | 0.29  | 8.05E-34 | NKT | Tgfb1    |
| 1.84E-37 | -1.69761 | 0.25  | 0.571 | 3.32E-33 | NKT | Grin1    |
| 2.17E-37 | -2.41304 | 0.028 | 0.298 | 3.91E-33 | NKT | Lst1     |
| 1.79E-36 | -1.22728 | 0.008 | 0.273 | 3.22E-32 | NKT | Tgm2     |
| 3.53E-36 | -1.15817 | 0.07  | 0.36  | 6.36E-32 | NKT | Snap23   |
| 9.58E-36 | -1.17427 | 0.146 | 0.462 | 1.72E-31 | NKT | Nfkb1z   |
| 1.09E-35 | -1.56388 | 0.013 | 0.272 | 1.96E-31 | NKT | Tpd52    |
| 1.09E-35 | -2.35567 | 0.036 | 0.302 | 1.97E-31 | NKT | Slc16a3  |
| 1.90E-35 | -1.57644 | 0.015 | 0.275 | 3.42E-31 | NKT | Ctgf     |
| 2.31E-35 | -2.72613 | 0.004 | 0.258 | 4.16E-31 | NKT | Hp       |
| 2.74E-35 | -2.075   | 0.013 | 0.268 | 4.93E-31 | NKT | Ncf2     |
| 7.55E-35 | -1.56269 | 0.017 | 0.272 | 1.36E-30 | NKT | Sell     |
| 1.40E-34 | -1.22041 | 0.049 | 0.322 | 2.51E-30 | NKT | Tmcc1    |
| 3.96E-34 | -4.39802 | 0.059 | 0.315 | 7.12E-30 | NKT | Lyz2     |
| 5.75E-34 | -1.71472 | 0.066 | 0.33  | 1.03E-29 | NKT | Ets2     |
| 2.12E-33 | -1.82945 | 0.008 | 0.252 | 3.82E-29 | NKT | Sp1      |
| 3.86E-33 | -1.21823 | 0.078 | 0.351 | 6.94E-29 | NKT | Gadd45g  |
| 7.92E-33 | -1.09504 | 0.015 | 0.262 | 1.43E-28 | NKT | Hmox1    |
| 1.88E-32 | -2.87778 | 0.034 | 0.277 | 3.38E-28 | NKT | Ccl6     |
| 2.98E-32 | -1.11454 | 0.038 | 0.293 | 5.36E-28 | NKT | Kctd12   |
| 4.81E-32 | -2.8753  | 0.025 | 0.268 | 8.65E-28 | NKT | Ccr12    |
| 2.01E-31 | -3.04955 | 0.021 | 0.256 | 3.62E-27 | NKT | Il1r2    |
| 2.37E-31 | -5.44644 | 0.087 | 0.333 | 4.26E-27 | NKT | Retnlg   |
| 6.93E-31 | -6.44802 | 0.22  | 0.473 | 1.25E-26 | NKT | S100a8   |
| 1.97E-30 | -2.31849 | 0.023 | 0.253 | 3.54E-26 | NKT | Csf3r    |
| 2.70E-30 | -3.34447 | 0.036 | 0.267 | 4.86E-26 | NKT | Il1b     |
| 4.08E-30 | -1.06906 | 0.11  | 0.375 | 7.35E-26 | NKT | Uap1     |
| 2.31E-29 | 1.145445 | 0.706 | 0.565 | 4.15E-25 | NKT | Rpl13a   |
| 2.14E-25 | -6.49038 | 0.278 | 0.508 | 3.85E-21 | NKT | S100a9   |
| 2.72E-24 | -1.14639 | 0.083 | 0.302 | 4.89E-20 | NKT | Nin1     |
| 4.84E-23 | -1.01897 | 0.136 | 0.363 | 8.71E-19 | NKT | Nudt4    |
| 2.55E-22 | -1.04798 | 0.341 | 0.53  | 4.58E-18 | NKT | Fosb     |
| 9.37E-22 | -1.03774 | 0.117 | 0.333 | 1.69E-17 | NKT | Ugdh     |



|          |          |       |       |          |         |           |
|----------|----------|-------|-------|----------|---------|-----------|
| 1.93E-19 | -1.38413 | 0.146 | 0.344 | 3.47E-15 | NKT     | Rnf149    |
| 2.92E-19 | -1.02206 | 0.411 | 0.593 | 5.25E-15 | NKT     | Hspalb    |
| 1.26E-17 | -3.60476 | 0.263 | 0.506 | 2.27E-13 | NKT     | Hba-a1    |
| 6.86E-13 | -3.48452 | 0.468 | 0.674 | 1.23E-08 | NKT     | Hbb-bs    |
| 1.11E-12 | -1.23723 | 0.466 | 0.654 | 2.01E-08 | NKT     | Taldo1    |
| 1.16E-08 | -1.52715 | 0.195 | 0.285 | 0.000209 | NKT     | Lmnbl     |
| 1.53E-06 | -1.25374 | 0.761 | 0.798 | 0.0275   | NKT     | S100a11   |
| 0        | 4.683094 | 0.425 | 0.005 | 0        | Stromal | cRgs5     |
| 0        | 3.809545 | 0.345 | 0     | 0        | Stromal | cMyh11    |
| 0        | 2.92914  | 0.437 | 0.005 | 0        | Stromal | cEgfl7    |
| 0        | 2.83782  | 0.471 | 0.008 | 0        | Stromal | cMylk     |
| 0        | 2.828387 | 0.724 | 0.024 | 0        | Stromal | cTinagl1  |
| 0        | 2.687808 | 0.632 | 0.021 | 0        | Stromal | cBcam     |
| 0        | 2.535743 | 0.379 | 0.002 | 0        | Stromal | cHigd1b   |
| 0        | 2.519826 | 0.253 | 0     | 0        | Stromal | cCldn5    |
| 0        | 2.315916 | 0.379 | 0.001 | 0        | Stromal | cSneg     |
| 0        | 2.272503 | 0.425 | 0.004 | 0        | Stromal | cTcf15    |
| 0        | 2.260343 | 0.414 | 0.002 | 0        | Stromal | cRgs4     |
| 0        | 2.116942 | 0.299 | 0     | 0        | Stromal | cEmcn     |
| 0        | 2.098189 | 0.563 | 0.001 | 0        | Stromal | cEsam     |
| 0        | 2.071782 | 0.31  | 0.001 | 0        | Stromal | cSorbs2   |
| 0        | 1.850429 | 0.368 | 0.003 | 0        | Stromal | cPcp411   |
| 0        | 1.805114 | 0.31  | 0     | 0        | Stromal | cCdh5     |
| 0        | 1.795516 | 0.402 | 0.006 | 0        | Stromal | cMcam     |
| 0        | 1.786183 | 0.322 | 0.002 | 0        | Stromal | cLmod1    |
| 0        | 1.601677 | 0.276 | 0.002 | 0        | Stromal | cApold1   |
| 0        | 1.594506 | 0.322 | 0.004 | 0        | Stromal | cCspg4    |
| 0        | 1.463109 | 0.253 | 0.001 | 0        | Stromal | cTiel     |
| 0        | 1.37078  | 0.333 | 0     | 0        | Stromal | cCasq2    |
| 0        | 1.250929 | 0.264 | 0.003 | 0        | Stromal | cF11r     |
| 0        | 1.208392 | 0.264 | 0.002 | 0        | Stromal | cMap3k7c1 |
| 0        | 1.194773 | 0.253 | 0.001 | 0        | Stromal | cNrip2    |
| 0        | 1.139661 | 0.253 | 0     | 0        | Stromal | cOlfr558  |
| #####    | 1.158407 | 0.31  | 0.005 | #####    | Stromal | cCcdc3    |
| #####    | 1.359352 | 0.253 | 0.003 | #####    | Stromal | cPln      |
| #####    | 1.471868 | 0.253 | 0.003 | #####    | Stromal | cKdr      |
| #####    | 1.187803 | 0.345 | 0.007 | #####    | Stromal | cPerp     |
| #####    | 1.764818 | 0.425 | 0.011 | #####    | Stromal | cAoc3     |
| #####    | 2.989101 | 0.69  | 0.031 | #####    | Stromal | cCav1     |
| #####    | 5.234221 | 0.517 | 0.022 | #####    | Stromal | cFabp4    |
| #####    | 2.713321 | 0.253 | 0.005 | #####    | Stromal | cCd36     |
| #####    | 2.32943  | 0.483 | 0.02  | #####    | Stromal | cGja4     |
| #####    | 1.835275 | 0.448 | 0.018 | #####    | Stromal | cCav2     |
| #####    | 1.532766 | 0.253 | 0.006 | #####    | Stromal | cEcscr    |
| #####    | 1.559289 | 0.391 | 0.016 | #####    | Stromal | cAtp1b2   |
| #####    | 2.155263 | 0.276 | 0.009 | #####    | Stromal | cAqp1     |
| #####    | 1.222704 | 0.287 | 0.01  | #####    | Stromal | cRcan2    |
| #####    | 1.510057 | 0.299 | 0.012 | #####    | Stromal | cClu      |
| #####    | 3.117384 | 0.483 | 0.033 | #####    | Stromal | cCox4i2   |
| #####    | 1.011597 | 0.299 | 0.014 | #####    | Stromal | cPedh1    |
| #####    | 1.248419 | 0.322 | 0.016 | #####    | Stromal | cItga7    |
| #####    | 4.820997 | 0.54  | 0.051 | 3.41E-97 | Stromal | cMyl9     |
| 7.76E-97 | 1.794536 | 0.31  | 0.016 | 1.40E-92 | Stromal | cRasd1    |
| 9.36E-95 | 1.027802 | 0.253 | 0.011 | 1.68E-90 | Stromal | cMrvil    |

|          |          |       |       |          |         |           |
|----------|----------|-------|-------|----------|---------|-----------|
| 2.52E-92 | 2.837747 | 0.437 | 0.036 | 4.53E-88 | Stromal | cMustn1   |
| 1.23E-91 | 2.432462 | 0.517 | 0.051 | 2.21E-87 | Stromal | cNotch3   |
| 4.92E-81 | 1.196503 | 0.31  | 0.02  | 8.85E-77 | Stromal | cRbpms2   |
| 5.65E-81 | 5.630692 | 0.402 | 0.034 | 1.02E-76 | Stromal | cTagln    |
| 4.21E-78 | 2.347195 | 0.402 | 0.035 | 7.59E-74 | Stromal | cDes      |
| 3.81E-65 | 3.538175 | 0.552 | 0.082 | 6.87E-61 | Stromal | cGml3889  |
| 7.59E-65 | 1.718628 | 0.379 | 0.037 | 1.37E-60 | Stromal | cTcim     |
| 1.38E-60 | 1.204668 | 0.31  | 0.027 | 2.48E-56 | Stromal | cKitl     |
| 1.12E-59 | 1.836886 | 0.402 | 0.044 | 2.02E-55 | Stromal | cCpe      |
| 5.78E-57 | 1.541743 | 0.264 | 0.021 | 1.04E-52 | Stromal | cPtprb    |
| 1.61E-55 | 2.039094 | 0.506 | 0.078 | 2.90E-51 | Stromal | cGucylal  |
| 4.25E-53 | 1.647557 | 0.264 | 0.022 | 7.65E-49 | Stromal | cArt3     |
| 3.33E-51 | 2.541856 | 0.471 | 0.07  | 6.00E-47 | Stromal | cCd200    |
| 3.99E-51 | 1.511528 | 0.414 | 0.055 | 7.18E-47 | Stromal | cGjcl     |
| 1.30E-50 | 2.93148  | 0.862 | 0.325 | 2.35E-46 | Stromal | cGngl1    |
| 4.63E-50 | 1.118401 | 0.414 | 0.052 | 8.34E-46 | Stromal | cPlekhol  |
| 1.54E-49 | 2.232872 | 0.253 | 0.022 | 2.77E-45 | Stromal | cAbcc9    |
| 8.26E-46 | 2.669974 | 0.483 | 0.086 | 1.49E-41 | Stromal | cCavin2   |
| 8.68E-46 | 1.502739 | 0.356 | 0.046 | 1.56E-41 | Stromal | cPalld    |
| 6.32E-44 | 2.419732 | 0.517 | 0.096 | 1.14E-39 | Stromal | cIgfbp5   |
| 1.32E-43 | 1.928254 | 0.494 | 0.093 | 2.38E-39 | Stromal | cGucylb1  |
| 3.73E-37 | 1.086768 | 0.276 | 0.033 | 6.71E-33 | Stromal | cRapgef5  |
| 1.05E-36 | 4.180363 | 0.575 | 0.159 | 1.90E-32 | Stromal | cTpm2     |
| 1.54E-36 | 2.299043 | 0.552 | 0.142 | 2.78E-32 | Stromal | cEpas1    |
| 2.12E-35 | 1.676133 | 0.402 | 0.071 | 3.81E-31 | Stromal | cPdlm3    |
| 2.42E-35 | 1.348697 | 0.402 | 0.072 | 4.35E-31 | Stromal | cCrim1    |
| 4.05E-35 | 1.143838 | 0.287 | 0.037 | 7.30E-31 | Stromal | cTesc     |
| 5.53E-35 | 2.429714 | 0.632 | 0.209 | 9.95E-31 | Stromal | cTsc22d1  |
| 8.90E-34 | 1.911282 | 0.356 | 0.06  | 1.60E-29 | Stromal | cTspan7   |
| 3.29E-32 | 1.080229 | 0.345 | 0.058 | 5.92E-28 | Stromal | cSorbs1   |
| 8.19E-32 | 2.696176 | 0.77  | 0.34  | 1.48E-27 | Stromal | cTm4sf1   |
| 3.71E-31 | 3.306421 | 0.253 | 0.033 | 6.68E-27 | Stromal | cKcnj8    |
| 1.79E-30 | 1.969759 | 0.644 | 0.235 | 3.23E-26 | Stromal | cTns1     |
| 3.32E-30 | 2.024527 | 0.368 | 0.068 | 5.98E-26 | Stromal | cRasl1la  |
| 1.48E-29 | 1.071626 | 0.264 | 0.038 | 2.66E-25 | Stromal | cTbx2     |
| 5.54E-28 | 1.378234 | 0.379 | 0.08  | 9.98E-24 | Stromal | cNr2f2    |
| 8.64E-28 | 1.992741 | 0.793 | 0.362 | 1.56E-23 | Stromal | cTimp3    |
| 4.91E-27 | 1.487446 | 0.356 | 0.071 | 8.83E-23 | Stromal | cMyolb    |
| 1.31E-26 | 1.284824 | 0.276 | 0.044 | 2.36E-22 | Stromal | cHrct1    |
| 1.86E-26 | 1.900462 | 0.69  | 0.305 | 3.34E-22 | Stromal | cRbpms    |
| 3.11E-26 | -2.32192 | 0.08  | 0.713 | 5.60E-22 | Stromal | cLspl     |
| 1.69E-25 | 1.078089 | 0.322 | 0.059 | 3.04E-21 | Stromal | cTrp53i11 |
| 3.29E-24 | 2.394323 | 0.575 | 0.212 | 5.91E-20 | Stromal | cPtp4a3   |
| 4.37E-24 | 1.171574 | 0.287 | 0.051 | 7.86E-20 | Stromal | cChchd10  |
| 1.41E-23 | 1.11297  | 0.402 | 0.099 | 2.54E-19 | Stromal | cEhd4     |
| 2.19E-23 | 1.064031 | 0.31  | 0.063 | 3.94E-19 | Stromal | cCol18a1  |
| 8.90E-23 | 1.581763 | 0.46  | 0.137 | 1.60E-18 | Stromal | cCystm1   |
| 1.22E-22 | 1.866184 | 0.299 | 0.061 | 2.20E-18 | Stromal | cPecam1   |
| 1.71E-22 | 1.268743 | 0.299 | 0.06  | 3.08E-18 | Stromal | cBtbd3    |
| 2.74E-22 | 1.623505 | 0.667 | 0.294 | 4.94E-18 | Stromal | cCd151    |
| 4.34E-22 | 1.582927 | 0.644 | 0.297 | 7.81E-18 | Stromal | cActn4    |
| 1.02E-21 | 1.072419 | 0.299 | 0.062 | 1.83E-17 | Stromal | cPpp1r12b |
| 1.55E-21 | 2.315711 | 0.529 | 0.196 | 2.78E-17 | Stromal | cCsrp2    |
| 1.80E-20 | -1.88415 | 0.598 | 0.865 | 3.25E-16 | Stromal | cS100a6   |

|          |          |       |       |          |         |           |
|----------|----------|-------|-------|----------|---------|-----------|
| 2.46E-20 | 1.594641 | 0.414 | 0.122 | 4.43E-16 | Stromal | cItgal    |
| 2.78E-20 | 1.504106 | 0.782 | 0.46  | 5.00E-16 | Stromal | cCrip2    |
| 3.02E-20 | 2.053473 | 0.402 | 0.114 | 5.44E-16 | Stromal | cMgll     |
| 3.92E-20 | -1.4923  | 0.08  | 0.631 | 7.06E-16 | Stromal | cCelf2    |
| 4.54E-20 | -1.54291 | 0.92  | 0.989 | 8.18E-16 | Stromal | cFtl1     |
| 9.53E-20 | 2.210231 | 0.667 | 0.385 | 1.72E-15 | Stromal | cCald1    |
| 1.09E-19 | 1.511521 | 0.471 | 0.156 | 1.96E-15 | Stromal | cLdhb     |
| 1.31E-19 | 5.055492 | 0.402 | 0.122 | 2.35E-15 | Stromal | cActa2    |
| 1.63E-19 | 1.445154 | 0.713 | 0.409 | 2.93E-15 | Stromal | cRras     |
| 1.69E-19 | 1.158036 | 0.264 | 0.053 | 3.04E-15 | Stromal | cTspan12  |
| 4.25E-19 | 1.404828 | 0.793 | 0.51  | 7.65E-15 | Stromal | cUqcr11   |
| 7.36E-19 | 1.096687 | 0.448 | 0.144 | 1.33E-14 | Stromal | cDab2ip   |
| 7.82E-19 | 1.213397 | 0.862 | 0.657 | 1.41E-14 | Stromal | cCox7a2   |
| 8.15E-19 | 1.683794 | 0.92  | 0.913 | 1.47E-14 | Stromal | cMyl6     |
| 1.38E-18 | 1.026888 | 0.299 | 0.068 | 2.49E-14 | Stromal | cPlxnd1   |
| 2.17E-18 | 1.074238 | 0.494 | 0.168 | 3.91E-14 | Stromal | cMef2c    |
| 2.25E-18 | 1.507991 | 0.655 | 0.356 | 4.05E-14 | Stromal | cCavin1   |
| 4.28E-18 | 1.815336 | 0.667 | 0.37  | 7.70E-14 | Stromal | cMfge8    |
| 5.98E-18 | 1.034267 | 0.287 | 0.067 | 1.08E-13 | Stromal | cPlcel    |
| 6.40E-18 | 2.748006 | 0.575 | 0.295 | 1.15E-13 | Stromal | cTpml     |
| 7.51E-18 | 1.508867 | 0.54  | 0.23  | 1.35E-13 | Stromal | cPkig     |
| 3.56E-17 | 1.160279 | 0.828 | 0.649 | 6.41E-13 | Stromal | cAtp5j    |
| 5.63E-17 | 1.039147 | 0.299 | 0.076 | 1.01E-12 | Stromal | cMap3k20  |
| 7.34E-17 | -2.22189 | 0.092 | 0.55  | 1.32E-12 | Stromal | cCot11    |
| 9.25E-17 | -1.96868 | 0.299 | 0.772 | 1.67E-12 | Stromal | cFxyd5    |
| 2.54E-16 | 1.226942 | 0.966 | 0.793 | 4.57E-12 | Stromal | cmt-Nd1   |
| 2.73E-16 | 1.953408 | 0.425 | 0.149 | 4.92E-12 | Stromal | cFabp5    |
| 3.52E-16 | 1.28648  | 0.759 | 0.507 | 6.34E-12 | Stromal | cItgb1    |
| 3.69E-16 | 1.337098 | 0.793 | 0.469 | 6.65E-12 | Stromal | cId3      |
| 4.00E-16 | 1.504628 | 0.506 | 0.207 | 7.20E-12 | Stromal | cHes1     |
| 9.59E-16 | -3.43582 | 0.046 | 0.494 | 1.73E-11 | Stromal | cCd52     |
| 1.02E-15 | 1.21769  | 0.517 | 0.219 | 1.84E-11 | Stromal | cOaz2     |
| 1.36E-15 | 1.265467 | 0.529 | 0.235 | 2.46E-11 | Stromal | cCtnna1   |
| 1.71E-15 | 1.756203 | 0.483 | 0.193 | 3.08E-11 | Stromal | cId1      |
| 1.80E-15 | 2.565531 | 0.299 | 0.078 | 3.24E-11 | Stromal | cRad      |
| 2.07E-15 | -3.71164 | 0.299 | 0.643 | 3.72E-11 | Stromal | cDcn      |
| 2.22E-15 | 2.829229 | 0.506 | 0.227 | 4.00E-11 | Stromal | cNdufa412 |
| 2.62E-15 | 2.379241 | 0.506 | 0.231 | 4.72E-11 | Stromal | cCsrp1    |
| 4.23E-15 | 1.196324 | 0.575 | 0.273 | 7.62E-11 | Stromal | cPpplr12c |
| 4.52E-15 | -2.87956 | 0.103 | 0.522 | 8.14E-11 | Stromal | cLum      |
| 5.12E-15 | -2.82613 | 0.034 | 0.465 | 9.22E-11 | Stromal | cRac2     |
| 8.95E-15 | 1.4297   | 0.414 | 0.156 | 1.61E-10 | Stromal | cSmtn     |
| 9.24E-15 | 1.27018  | 0.77  | 0.571 | 1.66E-10 | Stromal | cSlc25a4  |
| 1.04E-14 | 1.036447 | 0.414 | 0.152 | 1.88E-10 | Stromal | cVcl      |
| 1.65E-14 | -3.18255 | 0.149 | 0.535 | 2.98E-10 | Stromal | cHtra3    |
| 2.12E-14 | 1.349677 | 0.563 | 0.304 | 3.81E-10 | Stromal | cEhd2     |
| 2.54E-14 | -2.59534 | 0.046 | 0.466 | 4.58E-10 | Stromal | cCorola   |
| 4.15E-14 | -2.29377 | 0.092 | 0.485 | 7.48E-10 | Stromal | cMmp2     |
| 6.54E-14 | -1.17451 | 0.483 | 0.827 | 1.18E-09 | Stromal | cTsc22d3  |
| 6.62E-14 | 1.621817 | 0.874 | 0.673 | 1.19E-09 | Stromal | cCrip1    |
| 7.07E-14 | 1.427441 | 0.437 | 0.177 | 1.27E-09 | Stromal | cFilip11  |
| 8.60E-14 | -2.68084 | 0.08  | 0.485 | 1.55E-09 | Stromal | cFbln1    |
| 1.05E-13 | 1.06974  | 0.862 | 0.688 | 1.89E-09 | Stromal | cSelenow  |
| 1.10E-13 | -1.55551 | 0.115 | 0.544 | 1.97E-09 | Stromal | cMgst1    |

|          |          |       |       |          |         |           |
|----------|----------|-------|-------|----------|---------|-----------|
| 1.14E-13 | 1.352816 | 0.471 | 0.202 | 2.05E-09 | Stromal | cDlc1     |
| 1.23E-13 | 1.559448 | 0.448 | 0.195 | 2.21E-09 | Stromal | cMap1b    |
| 1.27E-13 | -1.80971 | 0.057 | 0.475 | 2.29E-09 | Stromal | cDpt      |
| 3.10E-13 | -1.58153 | 0.023 | 0.424 | 5.57E-09 | Stromal | cOlfml3   |
| 3.33E-13 | 1.31531  | 0.31  | 0.099 | 5.99E-09 | Stromal | cArhgap31 |
| 4.14E-13 | 1.44124  | 0.678 | 0.457 | 7.45E-09 | Stromal | cAtpif1   |
| 5.72E-13 | -2.25806 | 0.069 | 0.462 | 1.03E-08 | Stromal | cSmoc2    |
| 5.81E-13 | 1.700789 | 0.678 | 0.438 | 1.05E-08 | Stromal | cErrfil   |
| 8.61E-13 | -1.95984 | 0.011 | 0.41  | 1.55E-08 | Stromal | cLaptm5   |
| 9.68E-13 | -2.23186 | 0.011 | 0.4   | 1.74E-08 | Stromal | cSelplg   |
| 1.48E-12 | 1.514255 | 0.575 | 0.301 | 2.67E-08 | Stromal | cFam162a  |
| 1.58E-12 | -1.12901 | 0.184 | 0.579 | 2.84E-08 | Stromal | cSerpl    |
| 1.67E-12 | -2.2525  | 0.034 | 0.414 | 3.01E-08 | Stromal | cPtprc    |
| 1.67E-12 | 1.017265 | 0.954 | 0.843 | 3.01E-08 | Stromal | cmt-Cytb  |
| 1.91E-12 | -2.13575 | 0     | 0.381 | 3.44E-08 | Stromal | cCytip    |
| 1.97E-12 | 1.749705 | 0.379 | 0.147 | 3.54E-08 | Stromal | c4-Sep    |
| 2.13E-12 | -1.98073 | 0.103 | 0.474 | 3.84E-08 | Stromal | cSerpinfl |
| 3.88E-12 | -2.55391 | 0.172 | 0.515 | 6.99E-08 | Stromal | cClec3b   |
| 4.07E-12 | 1.353342 | 0.483 | 0.234 | 7.32E-08 | Stromal | cPim3     |
| 4.93E-12 | -1.82074 | 0.011 | 0.391 | 8.88E-08 | Stromal | cCd53     |
| 5.04E-12 | -2.04327 | 0.011 | 0.383 | 9.07E-08 | Stromal | cGmfg     |
| 5.29E-12 | 1.020176 | 0.586 | 0.325 | 9.53E-08 | Stromal | cMprp     |
| 5.90E-12 | 1.090567 | 0.943 | 0.827 | 1.06E-07 | Stromal | cmt-Nd4   |
| 7.64E-12 | -1.63559 | 0.092 | 0.449 | 1.38E-07 | Stromal | cLoxl1    |
| 8.56E-12 | 1.332604 | 0.471 | 0.233 | 1.54E-07 | Stromal | cPls3     |
| 1.02E-11 | -2.1843  | 0.103 | 0.459 | 1.84E-07 | Stromal | cStkl7b   |
| 1.19E-11 | -2.59389 | 0.034 | 0.392 | 2.14E-07 | Stromal | cLcpl     |
| 1.21E-11 | 1.117948 | 0.598 | 0.374 | 2.18E-07 | Stromal | cFermt2   |
| 1.30E-11 | -1.17108 | 0.023 | 0.394 | 2.34E-07 | Stromal | cPdgebra  |
| 1.33E-11 | 1.017486 | 0.782 | 0.58  | 2.40E-07 | Stromal | cFkbpla   |
| 1.40E-11 | 1.675353 | 0.368 | 0.148 | 2.53E-07 | Stromal | cLims2    |
| 2.18E-11 | -1.08899 | 0.287 | 0.648 | 3.92E-07 | Stromal | cIfngr1   |
| 2.62E-11 | -2.01915 | 0.149 | 0.505 | 4.72E-07 | Stromal | cGpx3     |
| 2.70E-11 | -1.22519 | 0.034 | 0.391 | 4.85E-07 | Stromal | cEntpd2   |
| 4.62E-11 | -1.32975 | 0.08  | 0.435 | 8.31E-07 | Stromal | cGpm6b    |
| 4.96E-11 | -1.78314 | 0.241 | 0.584 | 8.92E-07 | Stromal | cPil6     |
| 6.20E-11 | -2.09654 | 0.161 | 0.49  | 1.12E-06 | Stromal | cColla1   |
| 6.43E-11 | -1.94816 | 0.034 | 0.389 | 1.16E-06 | Stromal | cDpepl    |
| 9.17E-11 | 1.929728 | 0.517 | 0.29  | 1.65E-06 | Stromal | cAdamts1  |
| 1.20E-10 | 1.077714 | 0.586 | 0.339 | 2.16E-06 | Stromal | cLims1    |
| 1.23E-10 | -1.24147 | 0.057 | 0.394 | 2.21E-06 | Stromal | cCol5a1   |
| 1.37E-10 | 1.020954 | 0.264 | 0.084 | 2.47E-06 | Stromal | cTjpl     |
| 1.98E-10 | 1.024678 | 0.299 | 0.107 | 3.56E-06 | Stromal | cPde3a    |
| 2.68E-10 | 1.162401 | 0.471 | 0.235 | 4.83E-06 | Stromal | cActn1    |
| 2.70E-10 | 1.004074 | 0.724 | 0.542 | 4.86E-06 | Stromal | cUqcrb    |
| 2.75E-10 | 1.071632 | 0.299 | 0.099 | 4.95E-06 | Stromal | cPostn    |
| 2.89E-10 | 1.092123 | 0.586 | 0.369 | 5.21E-06 | Stromal | cHcfc1r1  |
| 3.01E-10 | 1.489693 | 0.575 | 0.369 | 5.42E-06 | Stromal | cPpplr12a |
| 3.07E-10 | 1.227269 | 0.517 | 0.298 | 5.53E-06 | Stromal | cMast4    |
| 3.30E-10 | -1.23689 | 0.023 | 0.364 | 5.95E-06 | Stromal | cHsd11b1  |
| 3.95E-10 | -1.17449 | 0.08  | 0.417 | 7.12E-06 | Stromal | cBiccl    |
| 4.09E-10 | -3.97716 | 0.69  | 0.771 | 7.36E-06 | Stromal | cGsn      |
| 5.02E-10 | -1.30419 | 0.138 | 0.477 | 9.04E-06 | Stromal | cGpsm3    |
| 5.91E-10 | -1.79312 | 0.241 | 0.56  | 1.06E-05 | Stromal | cPim1     |

|          |          |       |       |          |         |                |
|----------|----------|-------|-------|----------|---------|----------------|
| 6.07E-10 | 1.071829 | 0.264 | 0.087 | 1.09E-05 | Stromal | cBcr           |
| 6.20E-10 | -1.55667 | 0.115 | 0.432 | 1.12E-05 | Stromal | cPcsk6         |
| 6.66E-10 | -1.223   | 0.08  | 0.42  | 1.20E-05 | Stromal | cEzr           |
| 6.71E-10 | 1.826533 | 0.437 | 0.22  | 1.21E-05 | Stromal | cPdgfrb        |
| 6.76E-10 | 1.085442 | 0.552 | 0.324 | 1.22E-05 | Stromal | cMacf1         |
| 7.00E-10 | -1.11732 | 0.908 | 0.976 | 1.26E-05 | Stromal | cActg1         |
| 7.57E-10 | -1.70201 | 0     | 0.314 | 1.36E-05 | Stromal | cHest          |
| 7.62E-10 | 1.166522 | 0.437 | 0.215 | 1.37E-05 | Stromal | c2010111I01Rik |
| 8.51E-10 | -3.064   | 0.299 | 0.559 | 1.53E-05 | Stromal | cSrgn          |
| 8.63E-10 | -1.02609 | 0.034 | 0.365 | 1.55E-05 | Stromal | cMedag         |
| 9.42E-10 | -1.32981 | 0.092 | 0.416 | 1.70E-05 | Stromal | cTcf21         |
| 1.08E-09 | -3.68989 | 0.046 | 0.357 | 1.94E-05 | Stromal | cTyrobp        |
| 1.24E-09 | -1.50406 | 0.471 | 0.774 | 2.23E-05 | Stromal | cMcl1          |
| 1.27E-09 | -1.82203 | 0.161 | 0.456 | 2.29E-05 | Stromal | cColl5a1       |
| 1.93E-09 | 1.32648  | 0.437 | 0.217 | 3.48E-05 | Stromal | cPrss23        |
| 2.15E-09 | -1.02218 | 0.839 | 0.802 | 3.87E-05 | Stromal | cRpsa          |
| 2.87E-09 | -1.10705 | 0.08  | 0.401 | 5.17E-05 | Stromal | cOaf           |
| 2.91E-09 | -1.43161 | 0.011 | 0.312 | 5.24E-05 | Stromal | cEmilin2       |
| 3.27E-09 | 1.122626 | 0.517 | 0.298 | 5.88E-05 | Stromal | cLamb2         |
| 3.54E-09 | -1.5398  | 0.264 | 0.581 | 6.37E-05 | Stromal | cIfi2712a      |
| 4.06E-09 | 1.037799 | 0.874 | 0.547 | 7.30E-05 | Stromal | cCd81          |
| 4.12E-09 | -1.24495 | 0.046 | 0.345 | 7.42E-05 | Stromal | cGadd45a       |
| 4.37E-09 | -1.42915 | 0.034 | 0.336 | 7.87E-05 | Stromal | cSpon2         |
| 4.53E-09 | -1.28714 | 0.138 | 0.442 | 8.16E-05 | Stromal | cTnxb          |
| 4.79E-09 | -1.69316 | 0.034 | 0.329 | 8.63E-05 | Stromal | cEmb           |
| 4.98E-09 | -2.84647 | 0.069 | 0.362 | 8.97E-05 | Stromal | cMxd1          |
| 4.98E-09 | 1.1733   | 0.667 | 0.495 | 8.97E-05 | Stromal | cAplp2         |
| 6.67E-09 | -1.80199 | 0.115 | 0.424 | 0.00012  | Stromal | cMfap5         |
| 7.85E-09 | -1.18995 | 0.149 | 0.431 | 0.000141 | Stromal | cCpq           |
| 7.97E-09 | 1.401061 | 0.46  | 0.261 | 0.000144 | Stromal | cLpp           |
| 7.99E-09 | -1.05133 | 0.092 | 0.403 | 0.000144 | Stromal | cItm2a         |
| 9.04E-09 | -1.48894 | 0     | 0.283 | 0.000163 | Stromal | cItgb2         |
| 9.33E-09 | -1.18315 | 0.057 | 0.362 | 0.000168 | Stromal | cPcolce2       |
| 1.07E-08 | -1.34662 | 0.115 | 0.405 | 0.000193 | Stromal | cIslr          |
| 1.37E-08 | 1.026676 | 0.276 | 0.105 | 0.000247 | Stromal | cCdc42ep4      |
| 1.47E-08 | -1.30345 | 0.011 | 0.29  | 0.000264 | Stromal | cArhgap45      |
| 1.53E-08 | -1.22305 | 0.046 | 0.332 | 0.000275 | Stromal | cGfpt2         |
| 1.57E-08 | -1.68714 | 0.379 | 0.65  | 0.000284 | Stromal | cTaldol        |
| 1.74E-08 | -1.57227 | 0.08  | 0.369 | 0.000313 | Stromal | cC3            |
| 1.78E-08 | 1.077459 | 0.713 | 0.582 | 0.000321 | Stromal | cCox6a1        |
| 1.89E-08 | -1.69092 | 0.011 | 0.288 | 0.000341 | Stromal | cLtb           |
| 2.26E-08 | -1.51    | 0.069 | 0.353 | 0.000408 | Stromal | cTnfaip2       |
| 2.44E-08 | 1.054458 | 0.264 | 0.1   | 0.000439 | Stromal | cCbfa2t3       |
| 3.10E-08 | -1.10556 | 0.046 | 0.325 | 0.000558 | Stromal | cGda           |
| 3.14E-08 | -1.19256 | 0.161 | 0.447 | 0.000565 | Stromal | cAbca8a        |
| 3.22E-08 | -2.11904 | 0.264 | 0.503 | 0.00058  | Stromal | cCol3a1        |
| 3.28E-08 | 1.089282 | 0.736 | 0.648 | 0.000591 | Stromal | cAtp5b         |
| 3.41E-08 | -6.63387 | 0.184 | 0.468 | 0.000614 | Stromal | cS100a8        |
| 3.84E-08 | -1.52717 | 0     | 0.264 | 0.000691 | Stromal | cNcf4          |
| 4.33E-08 | -1.16324 | 0.138 | 0.42  | 0.00078  | Stromal | cRhog          |
| 4.50E-08 | -1.91509 | 0.023 | 0.29  | 0.000809 | Stromal | cSamsn1        |
| 4.93E-08 | 1.009915 | 0.31  | 0.13  | 0.000888 | Stromal | cNdrgl         |
| 5.01E-08 | -1.02306 | 0.161 | 0.453 | 0.000901 | Stromal | cR3hdm4        |
| 5.03E-08 | -1.31467 | 0     | 0.261 | 0.000906 | Stromal | cCd37          |

|          |          |       |       |          |           |           |
|----------|----------|-------|-------|----------|-----------|-----------|
| 5.71E-08 | 1.084516 | 0.598 | 0.406 | 0.001028 | Stromal   | cNdufa5   |
| 6.25E-08 | 1.108414 | 0.356 | 0.169 | 0.001124 | Stromal   | cAlad     |
| 6.44E-08 | 1.602164 | 0.356 | 0.18  | 0.00116  | Stromal   | cWtip     |
| 8.17E-08 | -1.80383 | 0.046 | 0.307 | 0.001472 | Stromal   | cSlfn2    |
| 8.38E-08 | -1.23167 | 0.069 | 0.336 | 0.001508 | Stromal   | cFam49b   |
| 9.35E-08 | -1.0748  | 0.046 | 0.315 | 0.001683 | Stromal   | cGsta3    |
| 9.91E-08 | -1.19371 | 0.218 | 0.451 | 0.001784 | Stromal   | cMxra8    |
| 1.12E-07 | -1.53198 | 0.011 | 0.267 | 0.002022 | Stromal   | cSell     |
| 1.18E-07 | 1.662656 | 0.402 | 0.219 | 0.002126 | Stromal   | cCxcl12   |
| 1.20E-07 | -2.41582 | 0.08  | 0.339 | 0.002159 | Stromal   | cFcer1g   |
| 1.35E-07 | -1.68445 | 0.31  | 0.565 | 0.002434 | Stromal   | cGrina    |
| 2.27E-07 | 1.549988 | 0.379 | 0.2   | 0.004089 | Stromal   | cSlc9a3r2 |
| 2.37E-07 | -1.24851 | 0.092 | 0.358 | 0.00426  | Stromal   | cLimd2    |
| 2.63E-07 | -1.29501 | 0.023 | 0.264 | 0.004726 | Stromal   | cHcls1    |
| 2.95E-07 | -1.05048 | 0.241 | 0.487 | 0.005303 | Stromal   | cLrp1     |
| 3.03E-07 | -1.14588 | 0.115 | 0.372 | 0.005453 | Stromal   | cCol8a1   |
| 3.08E-07 | 2.000779 | 0.609 | 0.518 | 0.005541 | Stromal   | cDstn     |
| 3.32E-07 | -1.76989 | 0.322 | 0.504 | 0.005982 | Stromal   | cColla2   |
| 3.46E-07 | -5.46394 | 0.08  | 0.329 | 0.006222 | Stromal   | cRetnlg   |
| 3.74E-07 | -2.31358 | 0.046 | 0.288 | 0.006729 | Stromal   | cAlox5ap  |
| 3.81E-07 | -1.10964 | 0.195 | 0.466 | 0.006868 | Stromal   | cFbln2    |
| 4.13E-07 | 1.01115  | 0.632 | 0.459 | 0.007428 | Stromal   | cNdufb7   |
| 4.55E-07 | -1.18529 | 0.195 | 0.513 | 0.008195 | Stromal   | cG0s2     |
| 4.78E-07 | -1.49707 | 0.563 | 0.841 | 0.008604 | Stromal   | cCebpb    |
| 5.15E-07 | -1.4614  | 0.023 | 0.265 | 0.009265 | Stromal   | cCxcr4    |
| 6.24E-07 | 1.611184 | 0.494 | 0.352 | 0.011237 | Stromal   | cPpplr14a |
| 7.04E-07 | -2.60291 | 0.023 | 0.253 | 0.012681 | Stromal   | cHp       |
| 7.07E-07 | -1.5988  | 0.057 | 0.296 | 0.012737 | Stromal   | cNeur13   |
| 7.17E-07 | -1.82075 | 0.103 | 0.34  | 0.012911 | Stromal   | cRnf149   |
| 8.22E-07 | 1.029889 | 0.356 | 0.178 | 0.014795 | Stromal   | cTspan4   |
| 9.08E-07 | 1.013583 | 0.563 | 0.386 | 0.016342 | Stromal   | cNdufa12  |
| 1.12E-06 | -3.24798 | 0.034 | 0.263 | 0.020085 | Stromal   | cIl1b     |
| 1.13E-06 | 1.007083 | 0.402 | 0.24  | 0.02038  | Stromal   | cMarveldl |
| 1.20E-06 | 1.057638 | 0.494 | 0.339 | 0.021518 | Stromal   | cSh3bgr1  |
| 1.29E-06 | -4.14559 | 0.08  | 0.31  | 0.023199 | Stromal   | cLyz2     |
| 1.37E-06 | -1.53725 | 0.034 | 0.256 | 0.024687 | Stromal   | cSor11    |
| 1.45E-06 | -2.69188 | 0.046 | 0.272 | 0.026119 | Stromal   | cCcl6     |
| 1.50E-06 | -1.05687 | 0.149 | 0.403 | 0.026933 | Stromal   | cOgn      |
| 1.58E-06 | -1.28673 | 0.253 | 0.467 | 0.02838  | Stromal   | cCol6a2   |
| 1.75E-06 | -1.98739 | 0.057 | 0.285 | 0.031417 | Stromal   | cPglyrp1  |
| 1.78E-06 | -1.31143 | 0.149 | 0.389 | 0.031998 | Stromal   | cTrib1    |
| 2.33E-06 | 1.153535 | 0.31  | 0.153 | 0.041921 | Stromal   | cTshz2    |
| 2.38E-06 | -1.48545 | 0.345 | 0.503 | 0.042883 | Stromal   | cPcolce   |
| 0        | 5.133017 | 0.957 | 0.002 |          | Basophils | Cyp11a1   |
| 0        | 4.928959 | 0.87  | 0.001 |          | Basophils | Mcpt8     |
| 0        | 4.848309 | 0.435 | 0.002 |          | Basophils | Il4       |
| 0        | 4.010514 | 0.87  | 0.002 |          | Basophils | Gata2     |
| 0        | 3.980787 | 0.783 | 0.001 |          | Basophils | Cpa3      |
| 0        | 3.176374 | 0.761 | 0.001 |          | Basophils | Cd200r3   |
| 0        | 2.866436 | 0.457 | 0.003 |          | Basophils | Il13      |
| 0        | 2.736414 | 0.696 | 0     |          | Basophils | Fcer1a    |
| 0        | 2.452967 | 0.674 | 0     |          | Basophils | Ms4a2     |
| 0        | 1.992254 | 0.543 | 0.001 |          | Basophils | Csrp3     |
| 0        | 1.44215  | 0.261 | 0     |          | Basophils | Slc6a4    |

|          |          |       |       |          |                             |
|----------|----------|-------|-------|----------|-----------------------------|
| 0        | 1.282541 | 0.348 | 0     | 0        | Basophil $\delta$ Alox15    |
| 0        | 1.254257 | 0.304 | 0.002 | 0        | Basophil $\delta$ Npl       |
| 0        | 1.187841 | 0.261 | 0.001 | 0        | Basophil $\delta$ Slc18a2   |
| 0        | 1.177799 | 0.283 | 0     | 0        | Basophil $\delta$ Grm6      |
| #####    | 2.463187 | 0.522 | 0.009 | #####    | Basophil $\delta$ Hgf       |
| #####    | 3.335507 | 0.674 | 0.022 | #####    | Basophil $\delta$ Csf2rb2   |
| #####    | 1.862434 | 0.413 | 0.01  | #####    | Basophil $\delta$ C3ar1     |
| #####    | 5.006119 | 0.913 | 0.058 | #####    | Basophil $\delta$ Ccl9      |
| #####    | 2.760116 | 0.804 | 0.043 | #####    | Basophil $\delta$ Lat2      |
| #####    | 2.074567 | 0.478 | 0.017 | #####    | Basophil $\delta$ Klf5      |
| #####    | 2.1662   | 0.609 | 0.029 | #####    | Basophil $\delta$ Syt13     |
| #####    | 1.629313 | 0.478 | 0.017 | #####    | Basophil $\delta$ Cdh1      |
| 2.33E-94 | 1.429545 | 0.478 | 0.022 | 4.20E-90 | Basophil $\delta$ Matk      |
| 3.45E-92 | 3.844019 | 0.891 | 0.089 | 6.21E-88 | Basophil $\delta$ Il6       |
| 1.01E-90 | 6.958724 | 0.935 | 0.106 | 1.83E-86 | Basophil $\delta$ Ccl3      |
| 3.98E-87 | 1.605731 | 0.348 | 0.013 | 7.16E-83 | Basophil $\delta$ Fosl1     |
| 1.89E-83 | 1.648989 | 0.348 | 0.014 | 3.41E-79 | Basophil $\delta$ Itga2b    |
| 3.87E-78 | 6.733433 | 0.978 | 0.138 | 6.96E-74 | Basophil $\delta$ Ccl4      |
| 5.24E-72 | 3.394832 | 0.739 | 0.078 | 9.43E-68 | Basophil $\delta$ Slc7a5    |
| 3.45E-68 | 3.788886 | 0.913 | 0.125 | 6.22E-64 | Basophil $\delta$ Osm       |
| 1.76E-62 | 1.810694 | 0.565 | 0.047 | 3.17E-58 | Basophil $\delta$ Il18r1    |
| 3.41E-54 | 2.19852  | 0.543 | 0.05  | 6.13E-50 | Basophil $\delta$ Cd7       |
| 7.29E-53 | 4.063803 | 1     | 0.24  | 1.31E-48 | Basophil $\delta$ Hdc       |
| 4.69E-51 | 3.078176 | 0.609 | 0.071 | 8.45E-47 | Basophil $\delta$ Serpinbla |
| 8.78E-51 | 1.103374 | 0.304 | 0.017 | 1.58E-46 | Basophil $\delta$ Specc1    |
| 1.16E-50 | 1.702497 | 0.391 | 0.028 | 2.09E-46 | Basophil $\delta$ Adora2b   |
| 3.55E-50 | 4.163903 | 0.717 | 0.102 | 6.40E-46 | Basophil $\delta$ Cks2      |
| 3.72E-50 | 4.233626 | 1     | 0.236 | 6.70E-46 | Basophil $\delta$ Ifitm1    |
| 7.61E-50 | 1.582505 | 0.413 | 0.032 | 1.37E-45 | Basophil $\delta$ Tec       |
| 3.51E-49 | 3.400082 | 0.978 | 0.229 | 6.31E-45 | Basophil $\delta$ Lilr4b    |
| 2.06E-48 | 2.811774 | 0.739 | 0.109 | 3.71E-44 | Basophil $\delta$ Csf2rb    |
| 3.93E-48 | 1.735876 | 0.478 | 0.045 | 7.08E-44 | Basophil $\delta$ Tbcl4     |
| 6.84E-48 | 1.342553 | 0.261 | 0.013 | 1.23E-43 | Basophil $\delta$ Slc7a8    |
| 8.18E-47 | 1.640636 | 0.543 | 0.058 | 1.47E-42 | Basophil $\delta$ Atplb1    |
| 1.20E-44 | 4.00087  | 0.783 | 0.14  | 2.17E-40 | Basophil $\delta$ Acod1     |
| 8.34E-44 | 1.701203 | 0.457 | 0.043 | 1.50E-39 | Basophil $\delta$ Aqp9      |
| 5.75E-43 | 4.201494 | 0.522 | 0.058 | 1.04E-38 | Basophil $\delta$ Gzmb      |
| 8.01E-43 | 1.625213 | 0.478 | 0.048 | 1.44E-38 | Basophil $\delta$ Lilrb4a   |
| 4.19E-42 | 1.28822  | 0.37  | 0.029 | 7.55E-38 | Basophil $\delta$ Cd244     |
| 1.13E-41 | 2.744674 | 0.826 | 0.16  | 2.04E-37 | Basophil $\delta$ Trf       |
| 9.38E-41 | 1.911006 | 0.674 | 0.1   | 1.69E-36 | Basophil $\delta$ Itk       |
| 6.48E-40 | 1.352299 | 0.326 | 0.025 | 1.17E-35 | Basophil $\delta$ Padi2     |
| 1.08E-39 | 1.584439 | 0.457 | 0.048 | 1.94E-35 | Basophil $\delta$ Dapp1     |
| 2.39E-39 | 1.268241 | 0.391 | 0.035 | 4.29E-35 | Basophil $\delta$ Llcam     |
| 5.94E-39 | 1.475783 | 0.435 | 0.044 | 1.07E-34 | Basophil $\delta$ Mapkapk3  |
| 8.56E-39 | 2.988065 | 0.891 | 0.218 | 1.54E-34 | Basophil $\delta$ Plek      |
| 1.57E-38 | 3.296592 | 0.761 | 0.151 | 2.83E-34 | Basophil $\delta$ Ptgs2     |
| 8.50E-38 | 3.101927 | 0.652 | 0.112 | 1.53E-33 | Basophil $\delta$ Eroll     |
| 1.99E-37 | 1.994383 | 0.739 | 0.139 | 3.59E-33 | Basophil $\delta$ Tnfaip8   |
| 2.44E-36 | 1.075738 | 0.283 | 0.02  | 4.40E-32 | Basophil $\delta$ Mboat1    |
| 1.36E-35 | 1.679745 | 0.587 | 0.083 | 2.44E-31 | Basophil $\delta$ Il7r      |
| 8.15E-35 | 2.779082 | 0.63  | 0.106 | 1.47E-30 | Basophil $\delta$ Nlrp3     |
| 1.11E-34 | 1.956059 | 0.761 | 0.148 | 2.00E-30 | Basophil $\delta$ Itgb7     |
| 5.49E-34 | 3.16303  | 0.696 | 0.132 | 9.89E-30 | Basophil $\delta$ Rgs1      |

|          |          |       |       |          |                               |
|----------|----------|-------|-------|----------|-------------------------------|
| 5.37E-33 | 1.531496 | 0.5   | 0.066 | 9.66E-29 | Basophil $\varsigma$ Alox5    |
| 1.82E-30 | 1.219176 | 0.435 | 0.053 | 3.28E-26 | Basophil $\varsigma$ Rab44    |
| 2.24E-30 | 1.940423 | 0.783 | 0.176 | 4.03E-26 | Basophil $\varsigma$ Ncf1     |
| 6.89E-30 | 2.102585 | 0.957 | 0.286 | 1.24E-25 | Basophil $\varsigma$ Alox5ap  |
| 9.22E-30 | 4.161165 | 0.957 | 0.442 | 1.66E-25 | Basophil $\varsigma$ Ier3     |
| 2.55E-29 | 2.464707 | 0.804 | 0.217 | 4.60E-25 | Basophil $\varsigma$ Cyp4f18  |
| 5.78E-29 | 3.637104 | 0.565 | 0.107 | 1.04E-24 | Basophil $\varsigma$ Gm20186  |
| 1.12E-26 | 1.854711 | 0.935 | 0.305 | 2.02E-22 | Basophil $\varsigma$ Lgals3   |
| 1.55E-26 | 1.406543 | 0.391 | 0.053 | 2.78E-22 | Basophil $\varsigma$ Stx3     |
| 1.26E-25 | 1.266072 | 0.37  | 0.047 | 2.27E-21 | Basophil $\varsigma$ Hist1hle |
| 4.27E-25 | 1.539522 | 0.587 | 0.111 | 7.68E-21 | Basophil $\varsigma$ Plac8    |
| 5.54E-25 | 2.360946 | 0.848 | 0.31  | 9.98E-21 | Basophil $\varsigma$ Emilin2  |
| 6.11E-25 | 3.225477 | 0.804 | 0.27  | 1.10E-20 | Basophil $\varsigma$ Ccl6     |
| 1.14E-24 | 1.358701 | 0.37  | 0.048 | 2.06E-20 | Basophil $\varsigma$ Tespal   |
| 1.30E-24 | 2.304173 | 0.783 | 0.234 | 2.33E-20 | Basophil $\varsigma$ Tnfaip3  |
| 3.04E-24 | 1.020705 | 0.326 | 0.039 | 5.47E-20 | Basophil $\varsigma$ Cish     |
| 1.15E-23 | 2.68891  | 0.913 | 0.591 | 2.06E-19 | Basophil $\varsigma$ Sub1     |
| 3.34E-23 | 1.307566 | 0.391 | 0.056 | 6.01E-19 | Basophil $\varsigma$ Pmaip1   |
| 3.29E-22 | 2.730568 | 0.87  | 0.497 | 5.92E-18 | Basophil $\varsigma$ Tax1bp1  |
| 1.01E-21 | 2.221058 | 0.761 | 0.256 | 1.81E-17 | Basophil $\varsigma$ Plk3     |
| 1.02E-21 | 1.212981 | 0.478 | 0.085 | 1.83E-17 | Basophil $\varsigma$ Il18rap  |
| 1.40E-21 | 1.537801 | 0.87  | 0.287 | 2.52E-17 | Basophil $\varsigma$ Samsn1   |
| 1.51E-21 | 3.005349 | 0.717 | 0.25  | 2.71E-17 | Basophil $\varsigma$ Csfl     |
| 3.49E-21 | 1.781981 | 0.935 | 0.389 | 6.29E-17 | Basophil $\varsigma$ Cd53     |
| 4.15E-21 | 2.320744 | 0.717 | 0.241 | 7.47E-17 | Basophil $\varsigma$ Ddit4    |
| 5.73E-21 | 1.198703 | 0.543 | 0.108 | 1.03E-16 | Basophil $\varsigma$ Napsa    |
| 1.04E-20 | 1.482927 | 0.978 | 0.336 | 1.87E-16 | Basophil $\varsigma$ Fcer1g   |
| 4.29E-20 | 1.537265 | 0.348 | 0.052 | 7.73E-16 | Basophil $\varsigma$ Gcnt1    |
| 1.14E-19 | 2.211403 | 0.478 | 0.104 | 2.05E-15 | Basophil $\varsigma$ Hilpda   |
| 1.95E-19 | 1.652289 | 0.413 | 0.078 | 3.51E-15 | Basophil $\varsigma$ Nabp1    |
| 2.15E-19 | 2.461252 | 0.957 | 0.723 | 3.87E-15 | Basophil $\varsigma$ Neat1    |
| 6.32E-19 | 2.589799 | 0.717 | 0.271 | 1.14E-14 | Basophil $\varsigma$ Furin    |
| 1.11E-18 | 1.695285 | 0.413 | 0.075 | 1.99E-14 | Basophil $\varsigma$ Gpr183   |
| 1.50E-18 | 1.170161 | 0.543 | 0.123 | 2.70E-14 | Basophil $\varsigma$ Ptpre    |
| 1.80E-18 | -2.99574 | 0.37  | 0.865 | 3.25E-14 | Basophil $\varsigma$ Sl100a6  |
| 2.19E-18 | 1.700115 | 0.435 | 0.092 | 3.94E-14 | Basophil $\varsigma$ Frmd4b   |
| 3.47E-18 | 1.965684 | 0.848 | 0.52  | 6.25E-14 | Basophil $\varsigma$ Mpc2     |
| 5.02E-18 | 1.770924 | 0.957 | 0.769 | 9.04E-14 | Basophil $\varsigma$ Fxyd5    |
| 5.21E-18 | 1.097932 | 0.37  | 0.064 | 9.38E-14 | Basophil $\varsigma$ Spn      |
| 5.85E-18 | 1.136113 | 0.37  | 0.063 | 1.05E-13 | Basophil $\varsigma$ Inpp4b   |
| 5.85E-18 | 1.922996 | 0.87  | 0.454 | 1.05E-13 | Basophil $\varsigma$ Nfkbiz   |
| 6.60E-18 | 2.166219 | 0.478 | 0.105 | 1.19E-13 | Basophil $\varsigma$ Cd69     |
| 8.70E-18 | 1.038808 | 0.326 | 0.05  | 1.57E-13 | Basophil $\varsigma$ Cst7     |
| 1.26E-16 | 1.419772 | 0.522 | 0.146 | 2.27E-12 | Basophil $\varsigma$ Nt5c3    |
| 1.49E-16 | 1.016692 | 0.326 | 0.054 | 2.68E-12 | Basophil $\varsigma$ Itgb3    |
| 1.72E-16 | 1.313696 | 0.478 | 0.123 | 3.10E-12 | Basophil $\varsigma$ Coq8b    |
| 1.82E-16 | 1.277128 | 0.37  | 0.071 | 3.27E-12 | Basophil $\varsigma$ Orai2    |
| 2.15E-16 | 1.450274 | 1     | 0.557 | 3.87E-12 | Basophil $\varsigma$ Srgn     |
| 2.59E-16 | 1.761517 | 0.935 | 0.674 | 4.67E-12 | Basophil $\varsigma$ Tagln2   |
| 3.00E-16 | 1.690385 | 0.783 | 0.301 | 5.41E-12 | Basophil $\varsigma$ Fam107b  |
| 3.45E-16 | 1.371116 | 0.478 | 0.119 | 6.20E-12 | Basophil $\varsigma$ Jak2     |
| 1.42E-15 | 1.554057 | 0.457 | 0.113 | 2.56E-11 | Basophil $\varsigma$ Klhl6    |
| 1.69E-15 | 1.581057 | 0.652 | 0.221 | 3.04E-11 | Basophil $\varsigma$ Dgat1    |
| 2.04E-15 | 2.061218 | 0.891 | 0.601 | 3.68E-11 | Basophil $\varsigma$ Cd9      |



|          |          |       |       |          |                               |
|----------|----------|-------|-------|----------|-------------------------------|
| 2.62E-15 | -2.09202 | 0.304 | 0.804 | 4.73E-11 | Basophil $\delta$ Psap        |
| 9.03E-15 | 2.21486  | 0.913 | 0.691 | 1.63E-10 | Basophil $\delta$ Nfkb1a      |
| 1.72E-14 | 1.616559 | 0.522 | 0.148 | 3.10E-10 | Basophil $\delta$ Baz1a       |
| 1.91E-14 | 1.143036 | 0.5   | 0.13  | 3.45E-10 | Basophil $\delta$ Hacd4       |
| 2.45E-14 | 1.535075 | 0.652 | 0.273 | 4.41E-10 | Basophil $\delta$ Pfkip       |
| 4.25E-14 | 2.310946 | 0.457 | 0.131 | 7.65E-10 | Basophil $\delta$ Hs3st1      |
| 7.99E-14 | 1.312365 | 0.478 | 0.142 | 1.44E-09 | Basophil $\delta$ Rfc2        |
| 8.47E-14 | 1.335993 | 0.717 | 0.263 | 1.53E-09 | Basophil $\delta$ Cxcr4       |
| 9.56E-14 | 1.328301 | 0.935 | 0.812 | 1.72E-09 | Basophil $\delta$ Pnrc1       |
| 1.03E-13 | 1.622261 | 0.63  | 0.212 | 1.86E-09 | Basophil $\delta$ Dusp5       |
| 1.54E-13 | 2.667237 | 0.783 | 0.532 | 2.78E-09 | Basophil $\delta$ Ifrd1       |
| 1.87E-13 | 1.200742 | 0.37  | 0.087 | 3.37E-09 | Basophil $\delta$ Tle1        |
| 3.82E-13 | 1.17793  | 0.804 | 0.327 | 6.88E-09 | Basophil $\delta$ Emb         |
| 5.58E-13 | 1.067616 | 0.978 | 0.838 | 1.00E-08 | Basophil $\delta$ Rpl38       |
| 8.35E-13 | 1.691589 | 0.717 | 0.377 | 1.50E-08 | Basophil $\delta$ Rab11a      |
| 1.10E-12 | 1.299346 | 0.761 | 0.311 | 1.99E-08 | Basophil $\delta$ Hcst        |
| 1.27E-12 | -1.91831 | 0     | 0.582 | 2.29E-08 | Basophil $\delta$ Fkbp1a      |
| 1.43E-12 | -3.10961 | 0     | 0.581 | 2.57E-08 | Basophil $\delta$ Ifi2712a    |
| 2.22E-12 | 1.180139 | 0.652 | 0.24  | 4.00E-08 | Basophil $\delta$ Fyb         |
| 2.46E-12 | 1.231272 | 0.304 | 0.065 | 4.43E-08 | Basophil $\delta$ Cables1     |
| 2.73E-12 | 1.10219  | 0.587 | 0.193 | 4.92E-08 | Basophil $\delta$ 1-Sep       |
| 4.86E-12 | 1.23122  | 1     | 0.989 | 8.76E-08 | Basophil $\delta$ Ft11        |
| 6.88E-12 | -3.86952 | 0.174 | 0.656 | 1.24E-07 | Basophil $\delta$ Cebpd       |
| 8.85E-12 | 1.258343 | 0.826 | 0.446 | 1.59E-07 | Basophil $\delta$ Vasp        |
| 1.03E-11 | 1.01633  | 0.652 | 0.222 | 1.86E-07 | Basophil $\delta$ Fcgr3       |
| 1.29E-11 | -2.39672 | 0.043 | 0.578 | 2.33E-07 | Basophil $\delta$ Selenop     |
| 1.40E-11 | 1.410197 | 0.522 | 0.189 | 2.53E-07 | Basophil $\delta$ Zc3h12a     |
| 1.84E-11 | 1.621124 | 0.652 | 0.315 | 3.32E-07 | Basophil $\delta$ Clint1      |
| 1.94E-11 | -2.79751 | 0     | 0.544 | 3.48E-07 | Basophil $\delta$ Crispld2    |
| 1.96E-11 | -2.11643 | 0.13  | 0.645 | 3.53E-07 | Basophil $\delta$ Timp2       |
| 1.97E-11 | 1.156038 | 0.891 | 0.76  | 3.55E-07 | Basophil $\delta$ Rapl1b      |
| 1.99E-11 | 1.393789 | 0.717 | 0.398 | 3.58E-07 | Basophil $\delta$ Rnf130      |
| 2.34E-11 | 1.946016 | 0.826 | 0.558 | 4.21E-07 | Basophil $\delta$ Pim1        |
| 2.42E-11 | -1.93854 | 0     | 0.541 | 4.35E-07 | Basophil $\delta$ App         |
| 3.14E-11 | -1.80681 | 0.261 | 0.711 | 5.66E-07 | Basophil $\delta$ Ifitm3      |
| 3.56E-11 | 1.251401 | 0.543 | 0.204 | 6.41E-07 | Basophil $\delta$ Mboat7      |
| 3.59E-11 | 1.362725 | 1     | 0.976 | 6.47E-07 | Basophil $\delta$ Actg1       |
| 5.78E-11 | 1.095087 | 0.5   | 0.166 | 1.04E-06 | Basophil $\delta$ Smim3       |
| 5.89E-11 | -2.25706 | 0.652 | 0.845 | 1.06E-06 | Basophil $\delta$ Cst3        |
| 6.07E-11 | -1.67137 | 0     | 0.527 | 1.09E-06 | Basophil $\delta$ Tnfrsfla    |
| 6.95E-11 | 1.101904 | 0.696 | 0.322 | 1.25E-06 | Basophil $\delta$ Man2b1      |
| 7.49E-11 | 1.520758 | 0.674 | 0.299 | 1.35E-06 | Basophil $\delta$ Rgs2        |
| 7.52E-11 | 1.295345 | 0.522 | 0.189 | 1.35E-06 | Basophil $\delta$ D16Ertd472e |
| 8.49E-11 | -3.64526 | 0     | 0.522 | 1.53E-06 | Basophil $\delta$ Lum         |
| 9.82E-11 | -3.93958 | 0.022 | 0.534 | 1.77E-06 | Basophil $\delta$ Htra3       |
| 1.21E-10 | -1.91473 | 0     | 0.516 | 2.19E-06 | Basophil $\delta$ Marcks      |
| 1.30E-10 | 1.337669 | 0.348 | 0.096 | 2.35E-06 | Basophil $\delta$ Stk19       |
| 1.37E-10 | 1.197079 | 0.391 | 0.109 | 2.47E-06 | Basophil $\delta$ Tmem71      |
| 1.56E-10 | -3.237   | 0     | 0.513 | 2.80E-06 | Basophil $\delta$ G0s2        |
| 2.26E-10 | -1.66868 | 0.065 | 0.573 | 4.07E-06 | Basophil $\delta$ Slc25a4     |
| 2.39E-10 | -1.80584 | 0.022 | 0.526 | 4.31E-06 | Basophil $\delta$ Ybx3        |
| 2.63E-10 | -3.27809 | 0     | 0.504 | 4.74E-06 | Basophil $\delta$ Gpx3        |
| 2.66E-10 | -1.53732 | 0.065 | 0.576 | 4.78E-06 | Basophil $\delta$ Ctsz        |
| 2.68E-10 | -2.2687  | 0     | 0.504 | 4.83E-06 | Basophil $\delta$ Pmepal      |

|          |          |       |       |          |                            |
|----------|----------|-------|-------|----------|----------------------------|
| 2.87E-10 | -1.5957  | 0.043 | 0.539 | 5.17E-06 | Basophil <i>s</i> Ifi27    |
| 2.94E-10 | 1.145755 | 0.87  | 0.72  | 5.30E-06 | Basophil <i>s</i> Sh3bgrl3 |
| 3.20E-10 | -4.07242 | 0.043 | 0.528 | 5.77E-06 | Basophil <i>s</i> Sparc    |
| 4.35E-10 | -2.10645 | 0     | 0.497 | 7.84E-06 | Basophil <i>s</i> Selenom  |
| 4.84E-10 | -2.70608 | 0.022 | 0.52  | 8.71E-06 | Basophil <i>s</i> Socs3    |
| 5.39E-10 | -3.74203 | 0.065 | 0.533 | 9.71E-06 | Basophil <i>s</i> Sparcl1  |
| 5.41E-10 | -2.69185 | 0.065 | 0.541 | 9.74E-06 | Basophil <i>s</i> Igfbp4   |
| 5.69E-10 | -1.93619 | 0.043 | 0.544 | 1.02E-05 | Basophil <i>s</i> Mgst1    |
| 6.00E-10 | -5.39814 | 0.239 | 0.643 | 1.08E-05 | Basophil <i>s</i> Dcn      |
| 6.47E-10 | 1.519057 | 0.261 | 0.058 | 1.16E-05 | Basophil <i>s</i> Slco2b1  |
| 6.48E-10 | -3.21852 | 0     | 0.49  | 1.17E-05 | Basophil <i>s</i> Colla1   |
| 6.68E-10 | -1.49064 | 0.565 | 0.794 | 1.20E-05 | Basophil <i>s</i> mt-Nd1   |
| 6.76E-10 | 1.078848 | 0.326 | 0.085 | 1.22E-05 | Basophil <i>s</i> Runx1    |
| 7.24E-10 | -3.98008 | 0.087 | 0.543 | 1.30E-05 | Basophil <i>s</i> Bgn      |
| 7.46E-10 | -2.96432 | 0.022 | 0.503 | 1.34E-05 | Basophil <i>s</i> Pcolce   |
| 7.67E-10 | 1.262436 | 0.413 | 0.129 | 1.38E-05 | Basophil <i>s</i> Ripor2   |
| 7.82E-10 | -3.38626 | 0.043 | 0.515 | 1.41E-05 | Basophil <i>s</i> Serping1 |
| 7.91E-10 | -2.73904 | 0.022 | 0.503 | 1.42E-05 | Basophil <i>s</i> Cygb     |
| 7.93E-10 | -2.09344 | 0     | 0.487 | 1.43E-05 | Basophil <i>s</i> Lrp1     |
| 8.86E-10 | -1.54162 | 0.043 | 0.523 | 1.59E-05 | Basophil <i>s</i> Ddost    |
| 1.03E-09 | 2.066228 | 0.63  | 0.294 | 1.85E-05 | Basophil <i>s</i> Neurl3   |
| 1.06E-09 | -1.00964 | 0.261 | 0.779 | 1.91E-05 | Basophil <i>s</i> Sem1     |
| 1.16E-09 | -3.03597 | 0.022 | 0.504 | 2.09E-05 | Basophil <i>s</i> Colla2   |
| 1.16E-09 | -2.55962 | 0     | 0.481 | 2.10E-05 | Basophil <i>s</i> Cfh      |
| 1.48E-09 | 1.487577 | 0.652 | 0.286 | 2.66E-05 | Basophil <i>s</i> Ltb      |
| 1.53E-09 | 1.213959 | 0.848 | 0.642 | 2.75E-05 | Basophil <i>s</i> Litaf    |
| 1.54E-09 | 1.98325  | 0.739 | 0.517 | 2.77E-05 | Basophil <i>s</i> Sqstm1   |
| 1.60E-09 | -2.24092 | 0.087 | 0.536 | 2.88E-05 | Basophil <i>s</i> Zbtb20   |
| 1.68E-09 | -2.26497 | 0     | 0.475 | 3.02E-05 | Basophil <i>s</i> Dpt      |
| 1.81E-09 | -3.10027 | 0.022 | 0.49  | 3.26E-05 | Basophil <i>s</i> Serpinh1 |
| 1.82E-09 | 1.03125  | 0.348 | 0.103 | 3.27E-05 | Basophil <i>s</i> Mob3c    |
| 1.82E-09 | 1.407518 | 0.587 | 0.297 | 3.27E-05 | Basophil <i>s</i> Nfil3    |
| 1.85E-09 | -3.58439 | 0.043 | 0.503 | 3.33E-05 | Basophil <i>s</i> Col3a1   |
| 1.85E-09 | 1.170075 | 0.739 | 0.38  | 3.34E-05 | Basophil <i>s</i> Gmfg     |
| 1.94E-09 | -2.10607 | 0     | 0.472 | 3.49E-05 | Basophil <i>s</i> Pmp22    |
| 2.32E-09 | -1.76806 | 0.022 | 0.489 | 4.18E-05 | Basophil <i>s</i> Nenf     |
| 2.34E-09 | -1.78122 | 0.109 | 0.567 | 4.21E-05 | Basophil <i>s</i> Cyb5a    |
| 2.46E-09 | -3.09066 | 0.022 | 0.485 | 4.44E-05 | Basophil <i>s</i> Fbln1    |
| 2.49E-09 | -2.43595 | 0.022 | 0.484 | 4.48E-05 | Basophil <i>s</i> Mmp2     |
| 2.69E-09 | -2.49609 | 0     | 0.467 | 4.85E-05 | Basophil <i>s</i> Col6a2   |
| 2.95E-09 | -4.41297 | 0.152 | 0.569 | 5.31E-05 | Basophil <i>s</i> Mgp      |
| 3.12E-09 | -1.40524 | 0.022 | 0.494 | 5.61E-05 | Basophil <i>s</i> Hmgn1    |
| 3.12E-09 | -3.61566 | 0.022 | 0.481 | 5.63E-05 | Basophil <i>s</i> Lpl      |
| 3.22E-09 | -2.479   | 0.13  | 0.549 | 5.79E-05 | Basophil <i>s</i> Cd81     |
| 3.50E-09 | 2.082495 | 0.5   | 0.231 | 6.30E-05 | Basophil <i>s</i> Prkd3    |
| 3.60E-09 | -2.55924 | 0.022 | 0.477 | 6.48E-05 | Basophil <i>s</i> Col6a1   |
| 3.99E-09 | -2.20886 | 0     | 0.46  | 7.19E-05 | Basophil <i>s</i> Nid1     |
| 4.42E-09 | -1.97919 | 0     | 0.458 | 7.95E-05 | Basophil <i>s</i> Phlda1   |
| 4.77E-09 | -2.4373  | 0.022 | 0.474 | 8.59E-05 | Basophil <i>s</i> Serpinf1 |
| 5.23E-09 | 1.187802 | 0.652 | 0.362 | 9.42E-05 | Basophil <i>s</i> Plp2     |
| 5.57E-09 | -1.92196 | 0.022 | 0.489 | 0.0001   | Basophil <i>s</i> Lhfp     |
| 5.62E-09 | 1.63761  | 0.848 | 0.595 | 0.000101 | Basophil <i>s</i> Anxa1    |
| 5.75E-09 | -2.72138 | 0.087 | 0.515 | 0.000104 | Basophil <i>s</i> Ltbp4    |
| 5.83E-09 | -3.35211 | 0.087 | 0.514 | 0.000105 | Basophil <i>s</i> Clec3b   |

|          |          |       |       |          |                            |
|----------|----------|-------|-------|----------|----------------------------|
| 6.02E-09 | -2.0353  | 0     | 0.453 | 0.000108 | Basophil $\delta$ Hspg2    |
| 6.04E-09 | -1.30537 | 0.087 | 0.543 | 0.000109 | Basophil $\delta$ Uqcrb    |
| 6.07E-09 | -1.88549 | 0     | 0.453 | 0.000109 | Basophil $\delta$ Slc43a3  |
| 6.34E-09 | -1.50357 | 0.174 | 0.611 | 0.000114 | Basophil $\delta$ Ctsb     |
| 6.41E-09 | -2.42062 | 0.022 | 0.471 | 0.000115 | Basophil $\delta$ Id3      |
| 6.52E-09 | -1.46985 | 0.022 | 0.478 | 0.000117 | Basophil $\delta$ Dhrs7    |
| 6.66E-09 | -2.14023 | 0.043 | 0.503 | 0.00012  | Basophil $\delta$ Rarres2  |
| 6.70E-09 | -1.4508  | 0.196 | 0.647 | 0.000121 | Basophil $\delta$ Ifngr1   |
| 6.82E-09 | -2.77404 | 0.043 | 0.487 | 0.000123 | Basophil $\delta$ Klf4     |
| 6.91E-09 | -1.7867  | 0     | 0.451 | 0.000124 | Basophil $\delta$ Mxra8    |
| 7.09E-09 | -2.38369 | 0.022 | 0.47  | 0.000128 | Basophil $\delta$ Atf3     |
| 7.72E-09 | -1.91653 | 0     | 0.449 | 0.000139 | Basophil $\delta$ Loxl1    |
| 8.32E-09 | -1.65293 | 0.326 | 0.676 | 0.00015  | Basophil $\delta$ Calr     |
| 8.43E-09 | -1.9781  | 0.022 | 0.467 | 0.000152 | Basophil $\delta$ Axl      |
| 8.46E-09 | -1.57674 | 0.022 | 0.478 | 0.000152 | Basophil $\delta$ Atp2b1   |
| 9.01E-09 | 1.17783  | 0.5   | 0.21  | 0.000162 | Basophil $\delta$ Ikbkb    |
| 1.02E-08 | -2.33535 | 0.022 | 0.466 | 0.000184 | Basophil $\delta$ Fbln2    |
| 1.06E-08 | -1.45312 | 0     | 0.443 | 0.00019  | Basophil $\delta$ Fcgrt    |
| 1.14E-08 | -1.63718 | 0.022 | 0.471 | 0.000205 | Basophil $\delta$ Cd302    |
| 1.14E-08 | -2.03004 | 0     | 0.442 | 0.000205 | Basophil $\delta$ Col4a1   |
| 1.15E-08 | -1.13112 | 0.196 | 0.627 | 0.000206 | Basophil $\delta$ Mrfap1   |
| 1.19E-08 | -1.65652 | 0     | 0.441 | 0.000213 | Basophil $\delta$ Rhoj     |
| 1.42E-08 | -2.3173  | 0.022 | 0.466 | 0.000256 | Basophil $\delta$ Ccdc80   |
| 1.44E-08 | -1.3715  | 0     | 0.438 | 0.00026  | Basophil $\delta$ Txndc5   |
| 1.47E-08 | 1.232514 | 0.652 | 0.373 | 0.000265 | Basophil $\delta$ Etf1     |
| 1.53E-08 | 1.267772 | 0.326 | 0.101 | 0.000275 | Basophil $\delta$ Bri3bp   |
| 1.57E-08 | -1.80043 | 0.239 | 0.639 | 0.000282 | Basophil $\delta$ Tubala   |
| 1.60E-08 | -1.5499  | 0.609 | 0.77  | 0.000288 | Basophil $\delta$ mt-Nd2   |
| 1.62E-08 | 1.380457 | 0.957 | 0.971 | 0.000292 | Basophil $\delta$ H3f3b    |
| 1.64E-08 | -1.87818 | 0     | 0.436 | 0.000295 | Basophil $\delta$ Plpp3    |
| 1.73E-08 | -2.35157 | 0.022 | 0.456 | 0.000312 | Basophil $\delta$ Coll15a1 |
| 1.74E-08 | -2.70086 | 0.022 | 0.452 | 0.000313 | Basophil $\delta$ Ly6a     |
| 1.75E-08 | -1.75312 | 0     | 0.434 | 0.000315 | Basophil $\delta$ Gpm6b    |
| 1.79E-08 | -1.86297 | 0.022 | 0.46  | 0.000322 | Basophil $\delta$ Nfix     |
| 1.83E-08 | -1.38366 | 0.13  | 0.569 | 0.000329 | Basophil $\delta$ Ahnak    |
| 1.85E-08 | -2.31668 | 0.065 | 0.488 | 0.000333 | Basophil $\delta$ Cd34     |
| 1.92E-08 | -1.5761  | 0.435 | 0.774 | 0.000345 | Basophil $\delta$ Txn1     |
| 1.96E-08 | -1.42168 | 0.087 | 0.536 | 0.000353 | Basophil $\delta$ Zfp3611  |
| 2.05E-08 | -1.23318 | 0.761 | 0.831 | 0.000368 | Basophil $\delta$ Rps2     |
| 2.06E-08 | -2.18601 | 0.043 | 0.468 | 0.000372 | Basophil $\delta$ Fstl1    |
| 2.21E-08 | -1.78448 | 0.13  | 0.539 | 0.000398 | Basophil $\delta$ Mtch1    |
| 2.28E-08 | -1.7869  | 0.022 | 0.462 | 0.00041  | Basophil $\delta$ Crip2    |
| 2.46E-08 | -1.5699  | 0.022 | 0.451 | 0.000443 | Basophil $\delta$ Camk2n1  |
| 2.53E-08 | 1.607006 | 0.37  | 0.119 | 0.000456 | Basophil $\delta$ Ctsc     |
| 2.62E-08 | -1.17938 | 0.739 | 0.807 | 0.000472 | Basophil $\delta$ Ptma     |
| 2.66E-08 | -1.65347 | 0.022 | 0.448 | 0.000478 | Basophil $\delta$ Nfib     |
| 2.73E-08 | -1.76902 | 0     | 0.426 | 0.000492 | Basophil $\delta$ Ebf1     |
| 2.75E-08 | -1.1416  | 0.435 | 0.827 | 0.000495 | Basophil $\delta$ Tsc22d3  |
| 2.81E-08 | 1.048072 | 0.587 | 0.287 | 0.000506 | Basophil $\delta$ Prkd     |
| 2.97E-08 | -1.77984 | 0.043 | 0.468 | 0.000535 | Basophil $\delta$ Lamc1    |
| 3.12E-08 | -1.17425 | 0.043 | 0.5   | 0.000561 | Basophil $\delta$ Myadm    |
| 3.17E-08 | -2.62204 | 0     | 0.424 | 0.000572 | Basophil $\delta$ Mfap5    |
| 3.19E-08 | -1.65892 | 0     | 0.424 | 0.000575 | Basophil $\delta$ Olfml3   |
| 3.21E-08 | -1.48736 | 0.022 | 0.455 | 0.000577 | Basophil $\delta$ Rhoc     |

|          |          |       |       |          |                    |
|----------|----------|-------|-------|----------|--------------------|
| 3.36E-08 | 1.009983 | 0.87  | 0.668 | 0.000605 | BasophilS100a10    |
| 3.58E-08 | -1.28    | 0.804 | 0.843 | 0.000644 | BasophilSmt-Cytb   |
| 3.58E-08 | -1.81489 | 0     | 0.421 | 0.000645 | BasophilSLamb1     |
| 3.65E-08 | -1.72468 | 0.043 | 0.457 | 0.000658 | BasophilSdc2       |
| 3.77E-08 | -1.11426 | 0.283 | 0.648 | 0.00068  | BasophilSPrdx1     |
| 3.91E-08 | -1.23215 | 0.283 | 0.706 | 0.000703 | BasophilSRpl2211   |
| 4.28E-08 | -1.68192 | 0.022 | 0.447 | 0.000771 | BasophilSAbca8a    |
| 4.65E-08 | -1.52576 | 0.261 | 0.711 | 0.000837 | BasophilSLspl      |
| 4.68E-08 | -1.11707 | 0.022 | 0.442 | 0.000842 | BasophilSNdufc2    |
| 4.71E-08 | -1.4504  | 0     | 0.416 | 0.000848 | BasophilSBicc1     |
| 4.73E-08 | -1.72047 | 0     | 0.416 | 0.000852 | BasophilSPryl      |
| 4.83E-08 | -1.30698 | 0.261 | 0.661 | 0.000869 | BasophilSmt-Nd3    |
| 5.00E-08 | -1.63909 | 0     | 0.415 | 0.0009   | BasophilSTcf21     |
| 5.05E-08 | -3.24236 | 0     | 0.415 | 0.000909 | BasophilSHspb1     |
| 5.54E-08 | 1.169983 | 0.63  | 0.392 | 0.000997 | BasophilSNfkb1     |
| 5.71E-08 | -2.31587 | 0.043 | 0.461 | 0.001028 | BasophilSsmoc2     |
| 5.71E-08 | -1.50209 | 0     | 0.413 | 0.001029 | BasophilSCavin3    |
| 6.11E-08 | -1.52756 | 0     | 0.412 | 0.0011   | BasophilSPtgis     |
| 6.45E-08 | -1.34076 | 0     | 0.411 | 0.001161 | BasophilSslc29a1   |
| 6.69E-08 | -2.04693 | 0.022 | 0.432 | 0.001205 | BasophilSGas1      |
| 6.86E-08 | -1.41387 | 0     | 0.409 | 0.001235 | BasophilSDdah2     |
| 7.73E-08 | -1.0325  | 0     | 0.407 | 0.001392 | BasophilSNdufa5    |
| 8.28E-08 | -1.42632 | 0     | 0.406 | 0.001491 | BasophilSLama2     |
| 8.37E-08 | -1.4984  | 0.283 | 0.615 | 0.001507 | BasophilSLaptm4a   |
| 8.56E-08 | -1.64791 | 0.022 | 0.44  | 0.001541 | BasophilSErrfil    |
| 8.78E-08 | -1.71065 | 0     | 0.405 | 0.001581 | BasophilSIslr      |
| 8.84E-08 | -1.76602 | 0.283 | 0.606 | 0.001592 | BasophilSAnxa5     |
| 9.06E-08 | -1.56269 | 0.065 | 0.478 | 0.001631 | BasophilSTcf4      |
| 9.64E-08 | -1.81376 | 0     | 0.403 | 0.001736 | BasophilSOgn       |
| 1.04E-07 | -1.04876 | 0.283 | 0.703 | 0.001868 | BasophilSNdufa13   |
| 1.06E-07 | 1.324217 | 0.739 | 0.546 | 0.001917 | BasophilSNcor1     |
| 1.08E-07 | -1.77073 | 0.022 | 0.432 | 0.001947 | BasophilSPcsk6     |
| 1.15E-07 | -1.81596 | 0.065 | 0.461 | 0.002073 | BasophilSRbp1      |
| 1.20E-07 | -1.25778 | 0     | 0.399 | 0.002156 | BasophilS100a16    |
| 1.21E-07 | -1.51792 | 0     | 0.399 | 0.002178 | BasophilSRamp2     |
| 1.34E-07 | 1.424118 | 0.761 | 0.517 | 0.002418 | BasophilSCdknla    |
| 1.36E-07 | -1.52523 | 0     | 0.397 | 0.002443 | BasophilSPam       |
| 1.40E-07 | -3.50183 | 0.152 | 0.539 | 0.002517 | BasophilSMt1       |
| 1.50E-07 | -1.97815 | 0.022 | 0.416 | 0.002706 | BasophilSCkb       |
| 1.51E-07 | -1.30382 | 0     | 0.394 | 0.00272  | BasophilSNfia      |
| 1.58E-07 | -1.37404 | 0     | 0.394 | 0.002852 | BasophilSCol5a1    |
| 1.59E-07 | -1.23617 | 0     | 0.394 | 0.002859 | BasophilSPkd2      |
| 1.60E-07 | -1.65802 | 0.043 | 0.445 | 0.002887 | BasophilSPrelp     |
| 1.72E-07 | -1.61363 | 0.087 | 0.477 | 0.003097 | BasophilSSerpinb6a |
| 1.77E-07 | -1.5779  | 0.152 | 0.529 | 0.003188 | BasophilSptbn1     |
| 1.83E-07 | -1.32602 | 0     | 0.391 | 0.003301 | BasophilSEntpd2    |
| 1.84E-07 | -1.34007 | 0.022 | 0.431 | 0.003319 | BasophilSCpq       |
| 1.90E-07 | -1.2903  | 0.022 | 0.425 | 0.003417 | BasophilSFxyd1     |
| 1.93E-07 | -1.36735 | 0.13  | 0.521 | 0.003471 | BasophilSPdia6     |
| 2.17E-07 | -4.78081 | 0.652 | 0.771 | 0.003906 | BasophilSGsn       |
| 2.19E-07 | -1.23936 | 0     | 0.387 | 0.003941 | BasophilSCald1     |
| 2.21E-07 | -1.35353 | 0     | 0.387 | 0.00398  | BasophilSAdamts2   |
| 2.29E-07 | -1.33515 | 0.174 | 0.577 | 0.004118 | BasophilSCts1      |
| 2.39E-07 | -1.03578 | 0.022 | 0.413 | 0.004306 | BasophilSTm2d2     |

|          |          |       |       |          |                   |
|----------|----------|-------|-------|----------|-------------------|
| 2.46E-07 | -2.34677 | 0     | 0.385 | 0.004423 | BasophilicMeg3    |
| 2.65E-07 | -1.08872 | 0.022 | 0.425 | 0.004765 | BasophilicCalu    |
| 2.76E-07 | -1.35802 | 0     | 0.383 | 0.004972 | BasophilicFbln5   |
| 3.08E-07 | -1.06733 | 0.043 | 0.44  | 0.005544 | BasophilicHexa    |
| 3.53E-07 | -1.01928 | 0.109 | 0.525 | 0.00636  | BasophilicPark7   |
| 3.70E-07 | 1.904356 | 0.348 | 0.118 | 0.006666 | BasophilicNfkbid  |
| 3.82E-07 | -1.37085 | 0.022 | 0.41  | 0.006881 | BasophilicNupr1   |
| 3.87E-07 | -1.14054 | 0     | 0.376 | 0.006962 | BasophilicFermt2  |
| 4.20E-07 | -1.02678 | 0     | 0.375 | 0.007554 | BasophilicIl6st   |
| 4.22E-07 | -1.39932 | 0.87  | 0.796 | 0.007603 | BasophilicRps20   |
| 4.32E-07 | -1.24876 | 0     | 0.374 | 0.007775 | BasophilicEmilin1 |
| 4.56E-07 | 1.478731 | 0.739 | 0.585 | 0.008216 | BasophilicPrdx6   |
| 4.76E-07 | -1.29992 | 0     | 0.372 | 0.008576 | BasophilicSod3    |
| 4.77E-07 | -1.10037 | 0     | 0.372 | 0.008596 | BasophilicMfge8   |
| 4.82E-07 | -1.65179 | 0     | 0.372 | 0.008679 | BasophilicCol8a1  |
| 4.90E-07 | -1.30156 | 0     | 0.371 | 0.008825 | BasophilicAce     |
| 4.95E-07 | -1.00064 | 0.109 | 0.533 | 0.008916 | BasophilicPebp1   |
| 5.01E-07 | -1.20038 | 0.196 | 0.593 | 0.009022 | BasophilicPpp1r2  |
| 5.06E-07 | -1.14478 | 0.043 | 0.417 | 0.009117 | BasophilicVkorc1  |
| 5.20E-07 | -1.48047 | 0     | 0.37  | 0.009367 | BasophilicCol6a3  |
| 5.24E-07 | -2.59935 | 0.022 | 0.392 | 0.009437 | BasophilicThbs1   |
| 5.60E-07 | -1.14004 | 0.022 | 0.393 | 0.01009  | BasophilicFkbp9   |
| 5.63E-07 | -2.0711  | 0     | 0.369 | 0.010131 | BasophilicC3      |
| 5.65E-07 | -1.34875 | 0     | 0.369 | 0.010179 | BasophilicFbn1    |
| 5.98E-07 | -1.19718 | 0.022 | 0.397 | 0.010768 | BasophilicItgb5   |
| 6.05E-07 | -1.09887 | 0.087 | 0.483 | 0.010889 | BasophilicAr11    |
| 6.56E-07 | -1.0864  | 0.022 | 0.391 | 0.011813 | BasophilicDpysl2  |
| 6.63E-07 | -2.23724 | 0.022 | 0.389 | 0.011935 | BasophilicDpep1   |
| 6.88E-07 | -1.23061 | 0     | 0.365 | 0.012386 | BasophilicMedag   |
| 6.98E-07 | -1.4828  | 0.065 | 0.442 | 0.012558 | BasophilicTnxb    |
| 7.13E-07 | -1.51046 | 0     | 0.364 | 0.012831 | BasophilicHsd11b1 |
| 7.84E-07 | -1.3185  | 0.065 | 0.452 | 0.014114 | BasophilicEmpl    |
| 8.01E-07 | -1.49566 | 0     | 0.361 | 0.014429 | BasophilicPcolce2 |
| 8.15E-07 | -1.15494 | 0     | 0.361 | 0.014667 | BasophilicLama4   |
| 8.34E-07 | 1.253498 | 0.283 | 0.093 | 0.015017 | BasophilicCebpa   |
| 8.97E-07 | -1.01983 | 0     | 0.359 | 0.016142 | BasophilicCnn3    |
| 9.08E-07 | -1.50626 | 0.022 | 0.382 | 0.016355 | BasophilicAdamts5 |
| 9.13E-07 | -1.48129 | 0.065 | 0.433 | 0.016437 | BasophilicPnp     |
| 9.17E-07 | -1.74221 | 0.478 | 0.776 | 0.016508 | BasophilicFos     |
| 9.64E-07 | -1.06759 | 0     | 0.358 | 0.01735  | BasophilicCavin1  |
| 1.01E-06 | -2.24147 | 0.283 | 0.583 | 0.01815  | BasophilicPil6    |
| 1.01E-06 | -1.13731 | 0.022 | 0.393 | 0.018228 | BasophilicPdgfra  |
| 1.05E-06 | -1.23164 | 0.022 | 0.383 | 0.018977 | BasophilicCol5a2  |
| 1.10E-06 | -1.03088 | 0.065 | 0.441 | 0.01972  | BasophilicUbl3    |
| 1.12E-06 | -1.02054 | 0.739 | 0.78  | 0.020176 | BasophilicRpl3    |
| 1.17E-06 | -1.48029 | 0.283 | 0.621 | 0.021078 | BasophilicRheb    |
| 1.41E-06 | -1.12219 | 0     | 0.35  | 0.025397 | BasophilicAebp1   |
| 1.45E-06 | -1.1783  | 0     | 0.349 | 0.026165 | BasophilicAngptl2 |
| 1.49E-06 | -1.41749 | 0.022 | 0.383 | 0.026787 | BasophilicAtf5    |
| 1.57E-06 | -1.02142 | 0     | 0.348 | 0.02828  | BasophilicMmp23   |
| 1.61E-06 | -1.48616 | 0.022 | 0.372 | 0.028927 | BasophilicGem     |
| 1.69E-06 | -1.11912 | 0.326 | 0.636 | 0.030387 | BasophilicLamp1   |
| 1.93E-06 | 1.023491 | 0.761 | 0.666 | 0.034719 | BasophilicGpi1    |
| 1.95E-06 | -1.21061 | 0     | 0.343 | 0.035179 | BasophilicTm4sf1  |

|          |          |       |       |          |                            |
|----------|----------|-------|-------|----------|----------------------------|
| 2.04E-06 | -1.04342 | 0     | 0.342 | 0.036724 | Basophil $\epsilon$ Dpys13 |
| 2.14E-06 | -1.17059 | 0.065 | 0.426 | 0.038527 | Basophil $\epsilon$ Nfic   |
| 2.34E-06 | -1.03752 | 0     | 0.339 | 0.042043 | Basophil $\epsilon$ Vwal   |
| 2.36E-06 | -1.0369  | 0.152 | 0.51  | 0.042501 | Basophil $\epsilon$ Rpn2   |
| 2.60E-06 | -1.09165 | 0.022 | 0.367 | 0.046842 | Basophil $\epsilon$ Nav1   |
| 2.65E-06 | -1.21161 | 0     | 0.336 | 0.047777 | Basophil $\epsilon$ Htral  |
| 2.67E-06 | -1.5814  | 0.022 | 0.364 | 0.048106 | Basophil $\epsilon$ Timp3  |
