# Supplementary material for: Integrated Single-Cell and RNA Sequencing Analysis Identifies Key Immune Cell and Dendritic Cells Associated Genes Participated in Myocarditis
Source: J Immunol Res. 2022 Oct 3;2022:8655343. doi: 10.1155/2022/8655343 (PMC9550476; doi:10.1155/2022/8655343)
Supplement: Supplementary Materials — See Figures S1-S2 and Table S1in the file of Supplementary Material. [file 8655343.f1.zip]

Archive with 3 entries (3 files):
- Supplemental Figure 1.pdf
- Supplemental Figure 2.pdf
- Supplemental Table 1.pdf
