# Supplementary figures and images for: Integrated Single-Cell and RNA Sequencing Analysis Identifies Key Immune Cell and Dendritic Cells Associated Genes Participated in Myocarditis
Source: Hindawi journal article supplement (doi:10.1155/2022/8655343), 2022-10-03

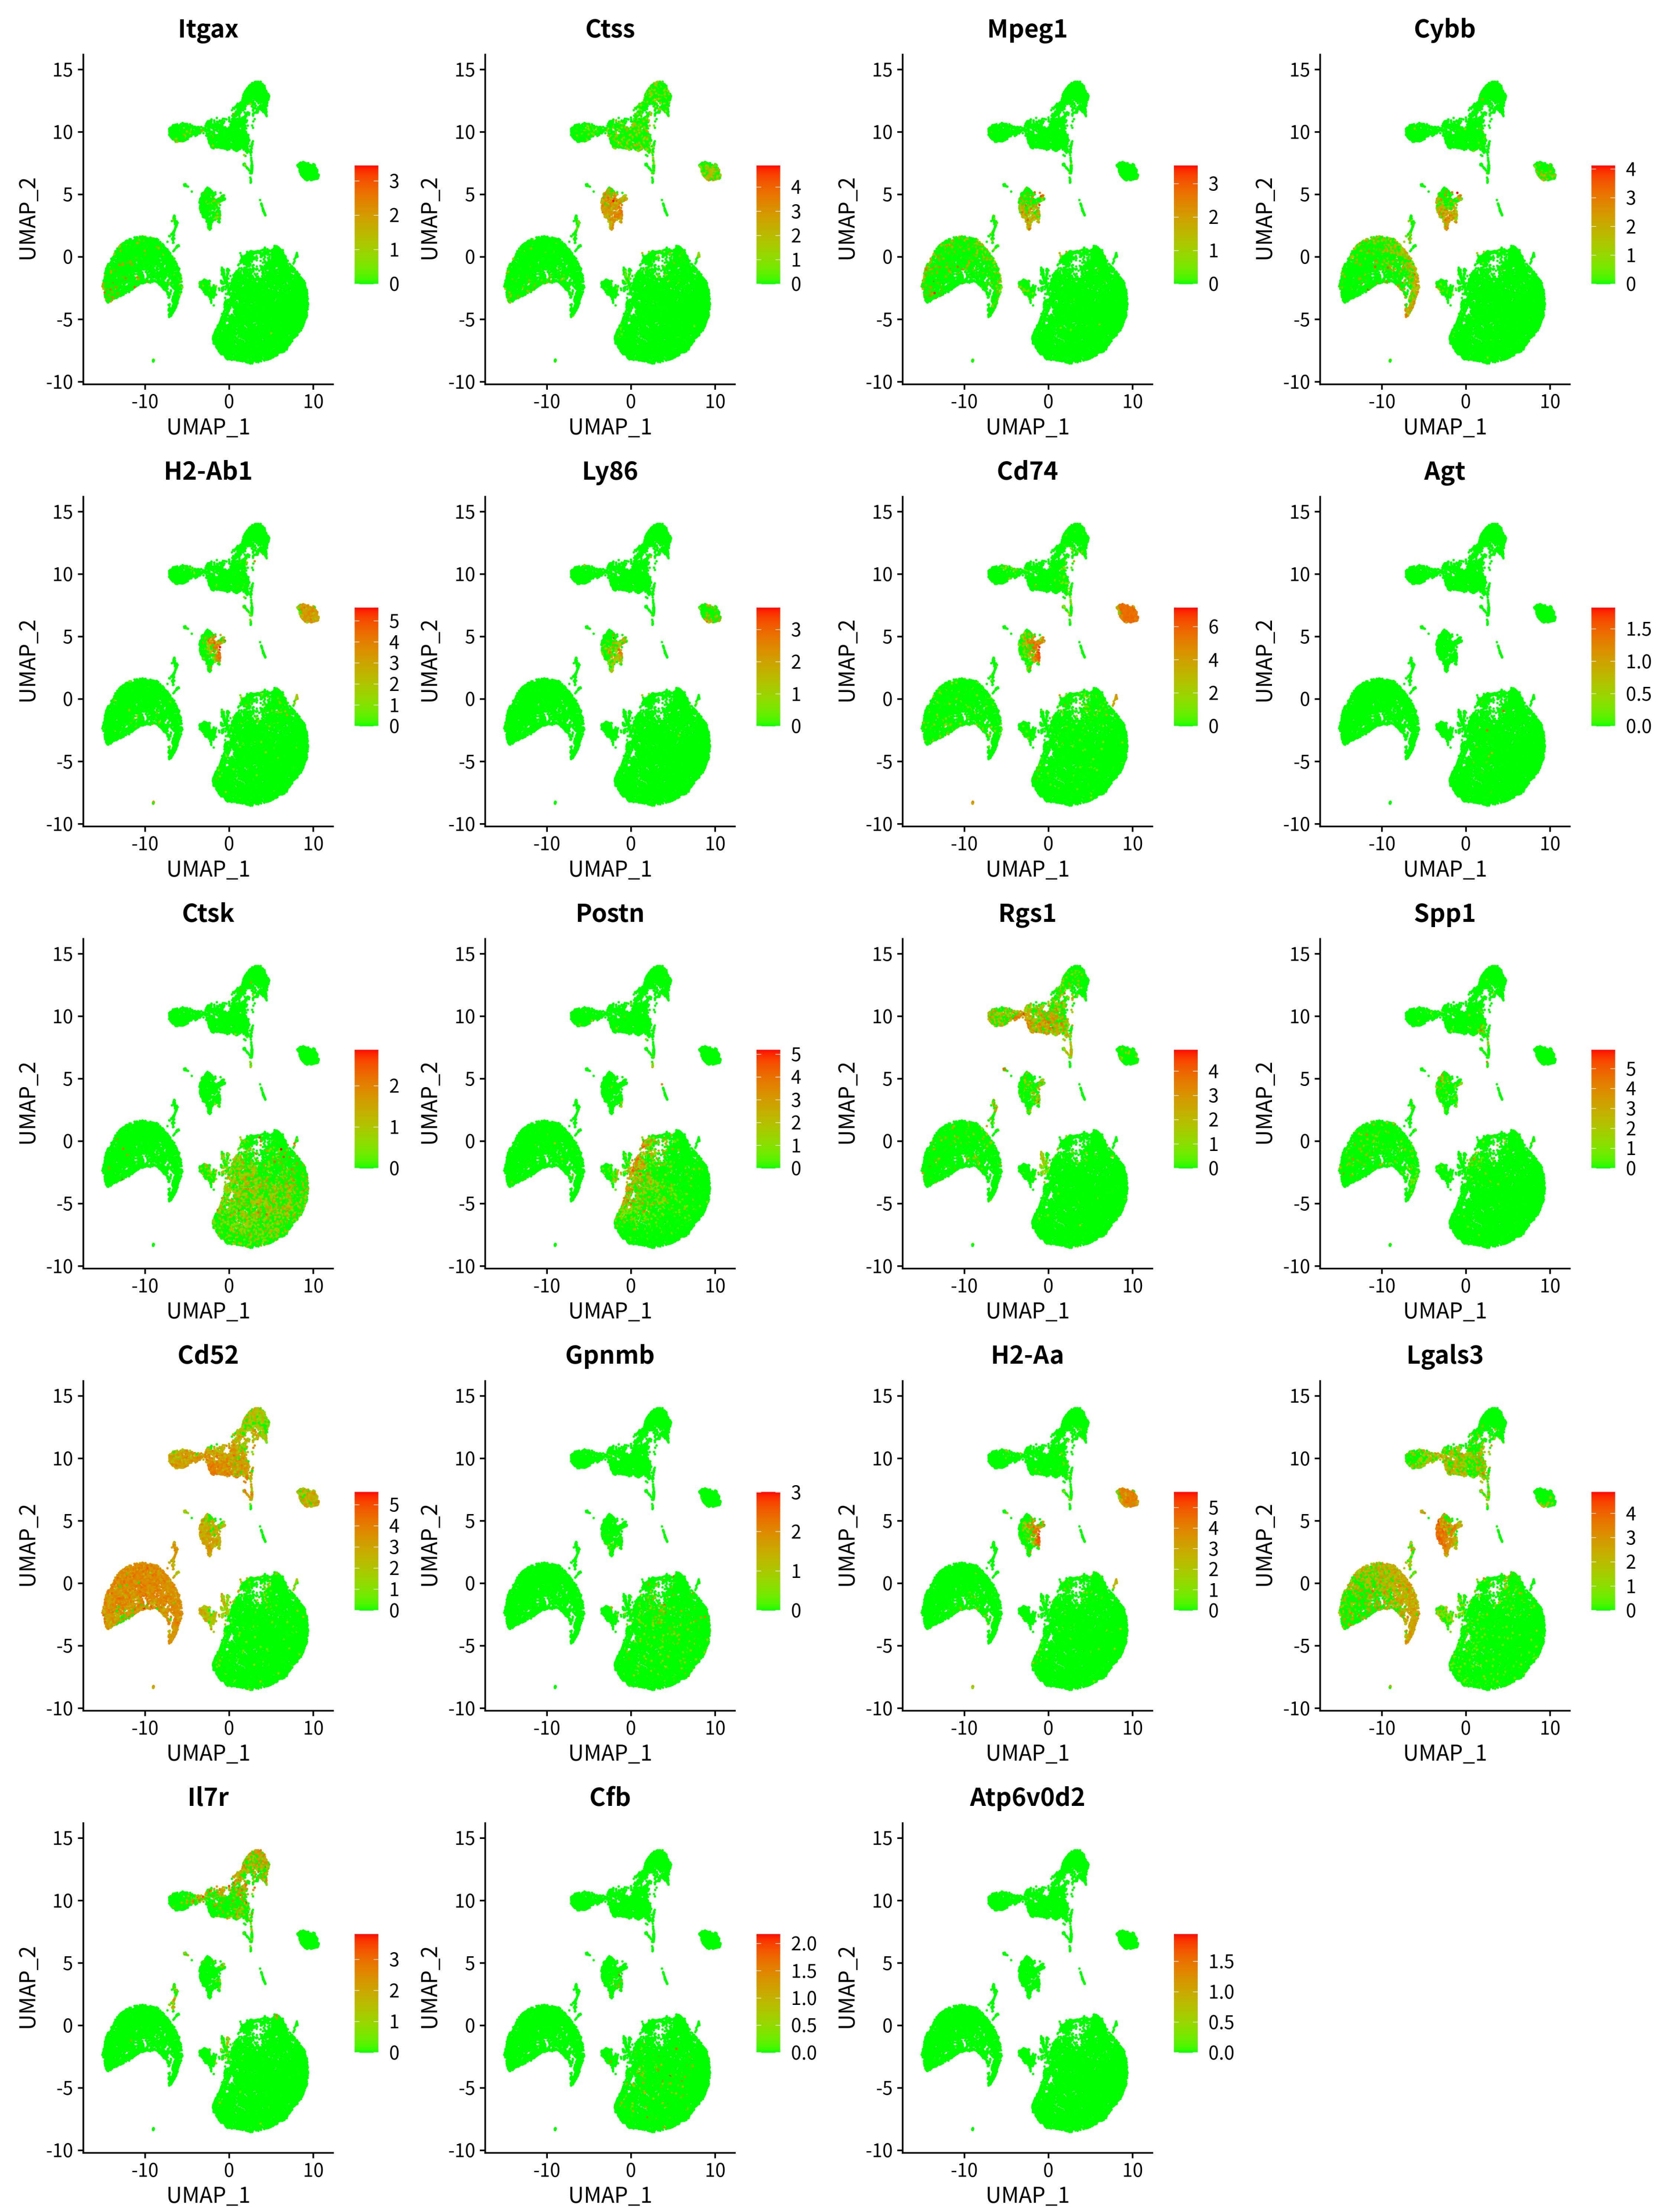

Supplement: f1 [file 8655343.f1.zip]

**Control**

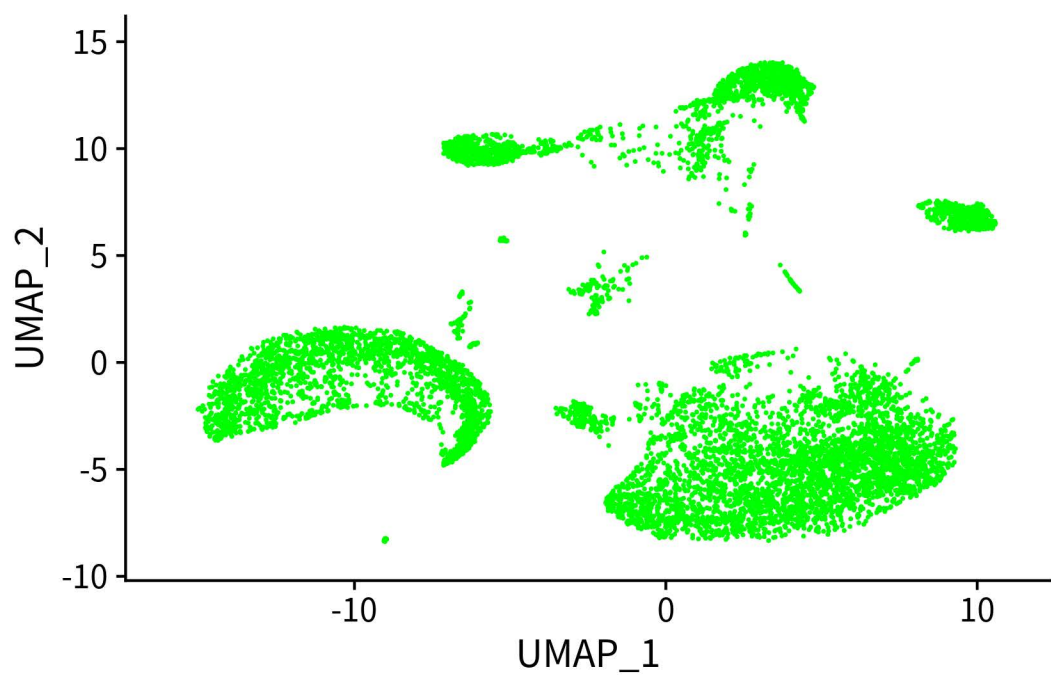

**Myocarditis**

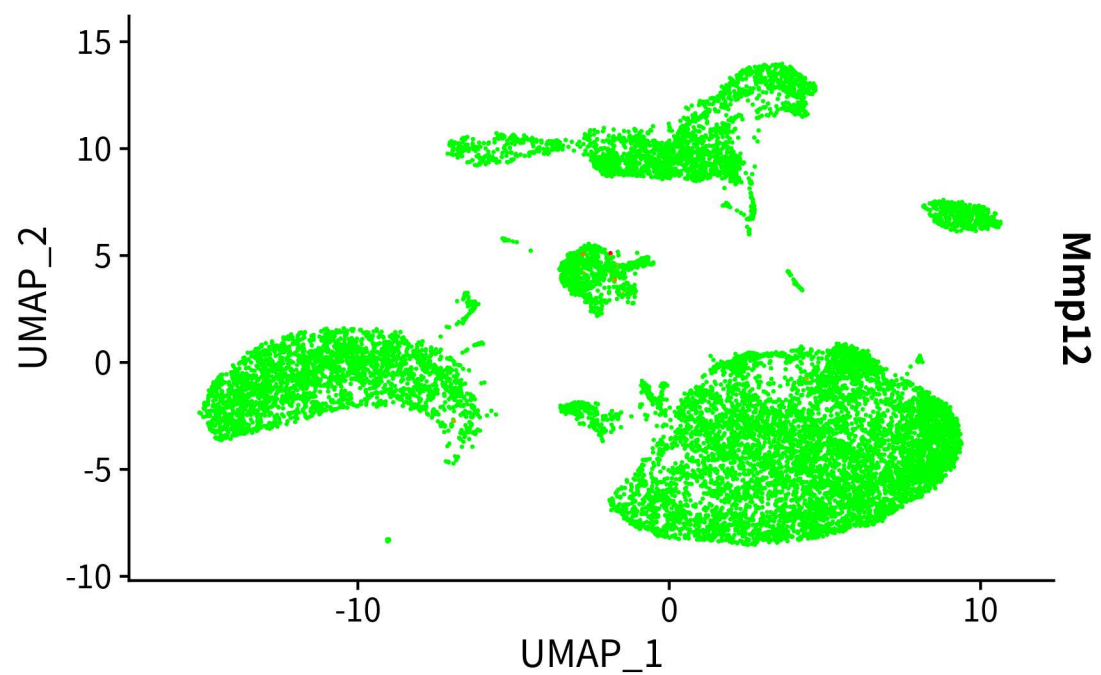

**Mmp12**

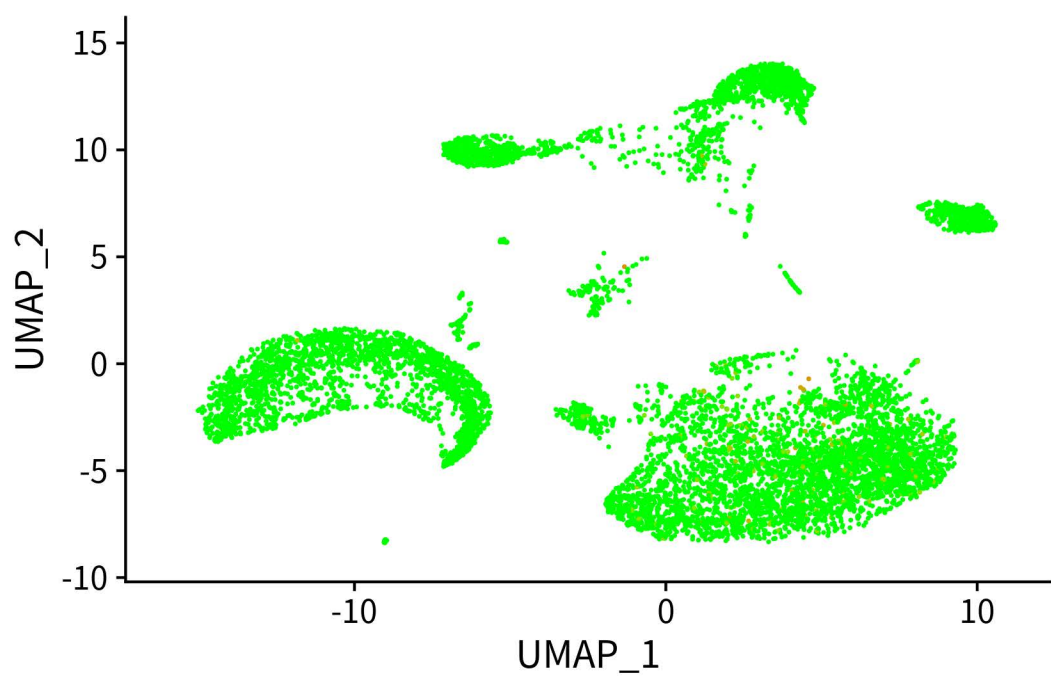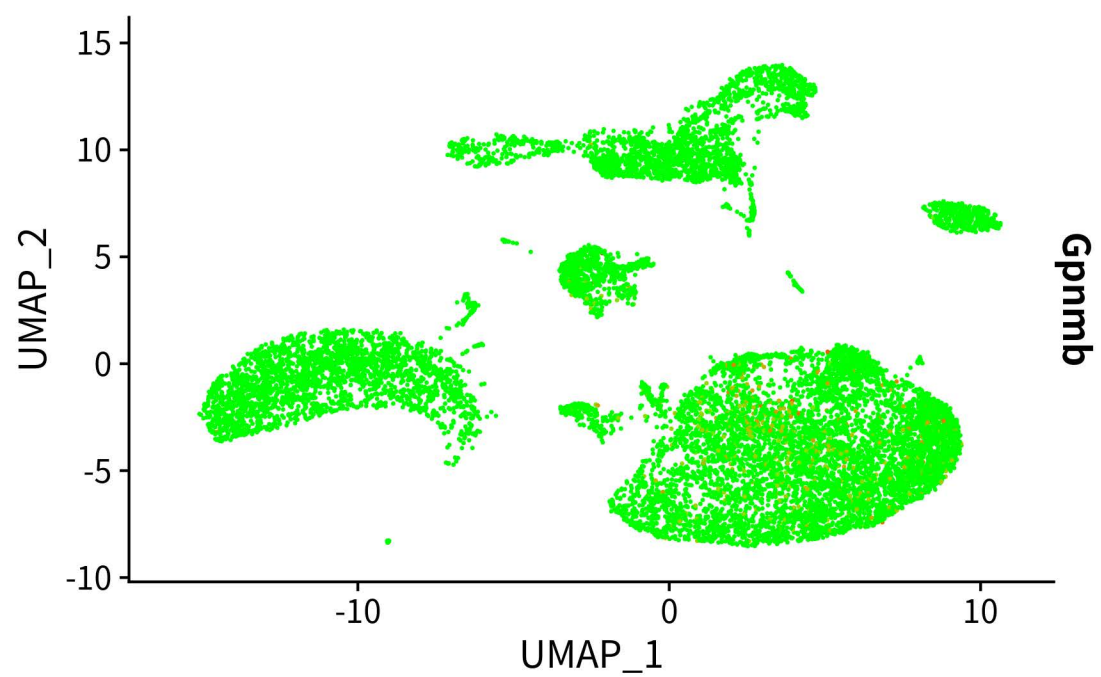

**Gpmmb**

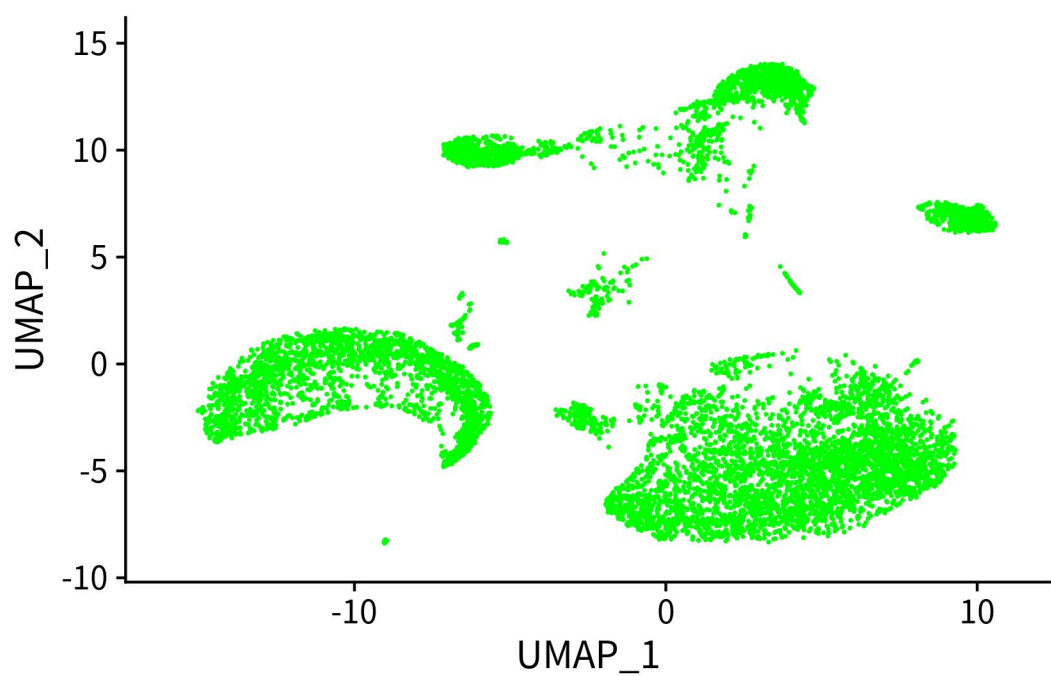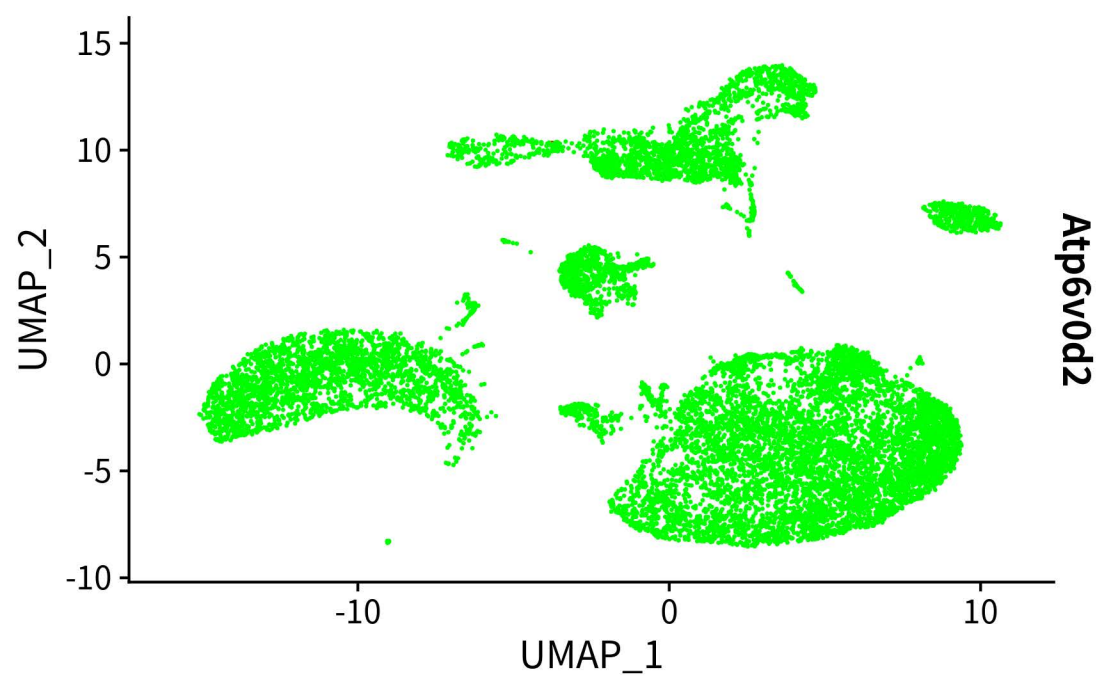

**Atp6v0d2**

Supplement: f1 [file 8655343.f1.zip]
